# Supplementary material for: A single-cell atlas reveals unanticipated cell type complexity in Drosophila ovaries
Source: HighWire-hosted journal article supplement (doi:10.1101/gr.274340.120), 2021-08-13
Supplement: Supplemental_Table_S1.xlsx [file Supplemental_Table_S1.xlsx]

## Sheet: Tab 1
Supplemental Table 1 - Markers
Tab 1 - All marker genes identified in the study. Table has following columns: gene - marker gene name; p_val - p-value (unadjusted); avg_logFC - log fold-change of the average expression between the cluster and cells from other clusters of the large cluster group (GC, germarium soma, or FC); pct.1 - percentage of cells where the gene is detected in cluster of interest; pct.2 - percentage of cell…
	gene	p_val	avg_logFC	pct.1	pct.2	p_val_adj	cluster
1	CG34323	3.73703e-211	1.38177	0.987	0.265	7.47405e-208	GC I
2	blanks	1.47573e-199	0.59823	0.875	0.211	2.95146e-196	GC I
3	c(3)G	2.54848e-193	1.66321	0.997	0.48	5.09697e-190	GC I
4	CG5194	1.69721e-192	1.15353	0.977	0.274	3.39441e-189	GC I
5	CG14932	1.50389e-191	1.19211	0.96	0.225	3.00778e-188	GC I
6	RpS10a	3.16794e-188	1.30661	0.98	0.36	6.33588e-185	GC I
7	Rbfox1	5.89285e-188	1.78541	0.997	0.746	1.17857e-184	GC I
8	mei-P26	3.17918e-186	1.5364	1	0.824	6.35836e-183	GC I
9	CG1943	1.35338e-185	1.61196	1	0.857	2.70676e-182	GC I
10	TfIIA-S	5.95994e-185	1.19435	1	0.973	1.19199e-181	GC I
11	AGO3	3.05286e-184	1.41165	0.993	0.395	6.10572e-181	GC I
12	cona	5.00745e-182	1.25586	0.98	0.354	1.00149e-178	GC I
13	Ssb-c31a	2.25399e-181	1.22054	1	0.968	4.50798e-178	GC I
14	baf	5.07015e-181	1.20507	1	0.975	1.01403e-177	GC I
15	CtBP	1.59655e-180	1.10132	1	0.984	3.19311e-177	GC I
16	CG44774	1.19284e-179	1.26826	1	0.766	2.38568e-176	GC I
17	HmgD	1.08381e-178	1.21054	1	0.995	2.16761e-175	GC I
18	X11Lbeta	3.00352e-178	0.525015	0.891	0.192	6.00703e-175	GC I
19	RpS19b	4.8275e-178	1.49292	0.983	0.464	9.65499e-175	GC I
20	asf1	8.78033e-178	1.19324	1	0.844	1.75607e-174	GC I
21	bam	8.48276e-177	1.17177	0.944	0.329	1.69655e-173	GC I
22	mnb	1.47868e-175	1.09289	1	0.874	2.95735e-172	GC I
23	Smn	2.56733e-175	1.29729	0.993	0.706	5.13467e-172	GC I
24	Ant2	1.42648e-172	1.0747	0.974	0.495	2.85296e-169	GC I
25	chinmo	5.44046e-172	1.14059	0.944	0.345	1.08809e-168	GC I
26	CG9926	5.64064e-172	0.925824	0.95	0.372	1.12813e-168	GC I
27	Jupiter	7.94863e-171	1.11367	1	0.983	1.58973e-167	GC I
28	Df31	8.29151e-171	1.03943	1	1	1.6583e-167	GC I
29	ovo	9.62752e-169	1.08244	0.977	0.404	1.9255e-165	GC I
30	trsn	2.57588e-168	1.08685	0.993	0.801	5.15176e-165	GC I
31	Lam	2.80304e-168	1.04461	1	0.958	5.60607e-165	GC I
32	qin	2.02905e-167	0.917318	0.927	0.309	4.05811e-164	GC I
33	CG15891	1.31919e-165	1.02487	0.98	0.565	2.63837e-162	GC I
34	His3.3B	6.08449e-165	1.1313	1	0.969	1.2169e-161	GC I
35	bru1	9.21364e-165	1.43928	0.997	0.485	1.84273e-161	GC I
36	CG13029	2.23256e-164	0.659876	0.891	0.233	4.46512e-161	GC I
37	CG10326	1.88615e-163	1.11266	0.98	0.668	3.77229e-160	GC I
38	shep	7.36249e-163	1.16818	0.993	0.812	1.4725e-159	GC I
39	corolla	2.193e-162	1.07948	0.927	0.373	4.38601e-159	GC I
40	RPA2	6.55062e-162	1.10657	0.997	0.818	1.31012e-158	GC I
41	tej	1.00347e-161	0.647826	0.904	0.246	2.00694e-158	GC I
42	CR32027	3.28472e-161	0.648142	0.927	0.322	6.56943e-158	GC I
43	stil	8.56525e-161	0.883023	0.931	0.277	1.71305e-157	GC I
44	Chrac-14	5.33517e-160	1.03337	0.987	0.777	1.06703e-156	GC I
45	CR44953	6.10151e-160	0.348668	0.838	0.257	1.2203e-156	GC I
46	Src64B	8.91591e-160	1.07127	0.977	0.584	1.78318e-156	GC I
47	CG32625	3.88156e-159	1.10625	0.967	0.441	7.76313e-156	GC I
48	borr	1.28774e-157	1.00654	0.983	0.634	2.57548e-154	GC I
49	vas	2.66055e-155	0.767373	0.934	0.359	5.3211e-152	GC I
50	Gbeta13F	4.29957e-155	1.10306	1	0.975	8.59913e-152	GC I
51	endos	8.38334e-155	0.940738	0.997	0.908	1.67667e-151	GC I
52	aub	2.11572e-154	1.15501	0.941	0.402	4.23145e-151	GC I
53	stet	7.14264e-154	0.70043	0.937	0.36	1.42853e-150	GC I
54	enc	7.58991e-154	1.10848	0.96	0.656	1.51798e-150	GC I
55	Hsp27	3.8115e-153	0.932538	1	0.987	7.62299e-150	GC I
56	CG6540	2.96083e-152	0.904203	0.993	0.747	5.92166e-149	GC I
57	CG8289	6.18914e-152	0.992691	0.983	0.663	1.23783e-148	GC I
58	Nipped-B	7.17902e-152	0.872545	0.997	0.924	1.4358e-148	GC I
59	pncr009:3L	1.45195e-151	0.945698	0.987	0.61	2.9039e-148	GC I
60	rhi	1.1508e-150	0.560668	0.901	0.359	2.30159e-147	GC I
61	CG4502	2.65029e-150	0.929154	0.993	0.825	5.30058e-147	GC I
62	Akap200	7.14176e-150	0.958891	0.993	0.832	1.42835e-146	GC I
63	CG14931	1.62924e-149	0.503951	0.878	0.262	3.25847e-146	GC I
64	CG9705	1.90963e-149	1.01984	0.96	0.665	3.81925e-146	GC I
65	Bsg	1.14306e-148	0.867025	0.997	0.913	2.28611e-145	GC I
66	Cks85A	2.90897e-148	0.849439	0.987	0.751	5.81793e-145	GC I
67	sina	2.99496e-148	0.909297	0.98	0.764	5.98993e-145	GC I
68	D1	3.56169e-148	0.849515	1	0.995	7.12338e-145	GC I
69	psq	1.93725e-146	0.876318	0.99	0.834	3.8745e-143	GC I
70	CG7372	1.29585e-145	1.15957	0.96	0.644	2.59169e-142	GC I
71	Pka-C1	1.5678e-145	0.94011	0.974	0.698	3.1356e-142	GC I
72	NaPi-III	1.89867e-145	0.773806	0.957	0.464	3.79735e-142	GC I
73	CG8300	4.19571e-144	0.823556	0.96	0.582	8.39142e-141	GC I
74	CG5281	2.19135e-143	0.405483	0.848	0.263	4.3827e-140	GC I
75	zpg	1.05668e-142	0.877757	0.934	0.385	2.11337e-139	GC I
76	CG6693	3.15974e-142	0.870292	0.964	0.655	6.31947e-139	GC I
77	Parp	4.09968e-142	0.836014	1	0.921	8.19936e-139	GC I
78	SMC2	6.14854e-141	0.875587	0.98	0.664	1.22971e-137	GC I
79	pav	1.95021e-140	1.04492	0.96	0.643	3.90042e-137	GC I
80	HipHop	2.51867e-140	0.868165	0.957	0.717	5.03733e-137	GC I
81	Ubi-p5E	1.06585e-139	0.958204	0.983	0.818	2.13169e-136	GC I
82	Oxp	2.95886e-139	0.760145	0.891	0.355	5.91772e-136	GC I
83	mad2	1.11671e-138	0.930012	0.97	0.689	2.23342e-135	GC I
84	RfC4	1.42379e-137	0.827578	0.997	0.896	2.84758e-134	GC I
85	kuk	3.1285e-137	0.970815	0.987	0.787	6.25701e-134	GC I
86	Pcl	1.97809e-136	0.807728	0.95	0.621	3.95619e-133	GC I
87	mub	5.19014e-136	0.904564	0.977	0.688	1.03803e-132	GC I
88	E(spl)mgamma-HLH	1.49072e-135	0.574299	0.868	0.422	2.98144e-132	GC I
89	otu	4.48728e-135	0.584844	0.888	0.342	8.97456e-132	GC I
90	Det	5.76549e-135	0.80988	0.974	0.668	1.1531e-131	GC I
91	E(spl)m8-HLH	3.78632e-134	1.40311	0.871	0.37	7.57265e-131	GC I
92	krimp	1.62877e-133	0.819246	0.917	0.493	3.25753e-130	GC I
93	CG9925	1.713e-133	0.654739	0.891	0.414	3.426e-130	GC I
94	CG45050	2.39092e-132	0.833764	0.983	0.816	4.78183e-129	GC I
95	ball	3.08296e-132	0.82732	0.967	0.741	6.16592e-129	GC I
96	Top2	5.05121e-132	0.863362	0.993	0.901	1.01024e-128	GC I
97	CG31053	4.5334e-130	0.482175	0.855	0.348	9.0668e-127	GC I
98	Cdc6	1.31115e-129	0.853833	0.954	0.65	2.62231e-126	GC I
99	Trf2	3.58294e-129	0.78484	0.993	0.892	7.16589e-126	GC I
100	nmo	7.69832e-129	0.805633	1	0.918	1.53966e-125	GC I
101	CG9801	8.12078e-129	0.335647	0.832	0.317	1.62416e-125	GC I
102	sti	1.55093e-128	0.767592	0.934	0.54	3.10186e-125	GC I
103	wap	5.39847e-128	0.808398	0.97	0.795	1.07969e-124	GC I
104	hrg	6.01872e-128	0.825883	0.97	0.692	1.20374e-124	GC I
105	egg	6.88654e-128	0.796453	0.934	0.61	1.37731e-124	GC I
106	msd1	1.50287e-127	0.830696	0.931	0.55	3.00574e-124	GC I
107	mahe	2.08716e-127	1.01344	0.974	0.808	4.17431e-124	GC I
108	SMC1	4.54501e-127	0.807012	0.964	0.759	9.09003e-124	GC I
109	CG8490	9.73279e-125	0.787007	0.921	0.556	1.94656e-121	GC I
110	Chrac-16	2.63753e-124	1.03195	0.99	0.841	5.27507e-121	GC I
111	Nse1	5.26048e-124	0.696368	0.924	0.5	1.0521e-120	GC I
112	Mcr	6.37978e-124	0.691011	0.891	0.504	1.27596e-120	GC I
113	Drep2	2.71266e-123	0.897288	0.878	0.447	5.42533e-120	GC I
114	Reep1	3.87903e-123	0.640727	0.934	0.503	7.75807e-120	GC I
115	Claspin	1.07947e-122	0.933908	0.974	0.741	2.15895e-119	GC I
116	RnrS	1.37513e-122	0.982828	0.974	0.793	2.75026e-119	GC I
117	Mis12	4.24974e-122	0.760033	0.921	0.527	8.49947e-119	GC I
118	orb	5.6593e-122	0.344651	0.871	0.371	1.13186e-118	GC I
119	unc-13	2.026e-121	0.764064	0.974	0.677	4.05199e-118	GC I
120	Rcd5	6.93452e-121	0.72006	0.957	0.658	1.3869e-117	GC I
121	Mkp3	8.27734e-120	0.73769	0.967	0.668	1.65547e-116	GC I
122	CG7154	1.11962e-119	0.747179	0.954	0.718	2.23924e-116	GC I
123	CG13949	1.94332e-119	0.462751	0.812	0.225	3.88664e-116	GC I
124	Pa1	4.80367e-119	0.734318	0.983	0.812	9.60735e-116	GC I
125	RfC38	1.18409e-118	0.740797	0.983	0.769	2.36818e-115	GC I
126	aurB	4.24798e-118	0.878875	0.967	0.737	8.49596e-115	GC I
127	CG7352	1.04945e-117	0.33608	0.835	0.378	2.09889e-114	GC I
128	Oda	2.91755e-117	0.645083	1	0.987	5.83511e-114	GC I
129	Ndc80	4.12872e-117	0.684132	0.941	0.608	8.25744e-114	GC I
130	Nrt	1.58207e-116	0.543965	0.908	0.446	3.16415e-113	GC I
131	CG13540	3.34296e-116	0.464339	0.716	0.101	6.68592e-113	GC I
132	CG7504	7.35103e-116	0.6446	0.904	0.526	1.47021e-112	GC I
133	akirin	4.30824e-115	0.63223	1	0.993	8.61649e-112	GC I
134	CG2247	7.47386e-115	0.682775	0.931	0.592	1.49477e-111	GC I
135	CG8223	1.81214e-114	0.907961	0.97	0.873	3.62428e-111	GC I
136	PMP34	8.57898e-113	0.601326	0.894	0.489	1.7158e-109	GC I
137	SKIP	2.43343e-112	0.429579	0.868	0.43	4.86685e-109	GC I
138	eIF4G2	3.81696e-112	0.786995	0.95	0.7	7.63392e-109	GC I
139	Rcd-1	6.04603e-112	0.86454	0.97	0.785	1.20921e-108	GC I
140	CG15628	1.08002e-111	0.488651	0.809	0.294	2.16004e-108	GC I
141	p120ctn	2.7363e-111	0.770329	0.937	0.751	5.4726e-108	GC I
142	cav	4.7897e-111	0.620931	0.898	0.492	9.5794e-108	GC I
143	Tpc1	1.26874e-110	0.492823	0.911	0.53	2.53748e-107	GC I
144	Tl	1.45077e-110	0.266773	0.779	0.148	2.90155e-107	GC I
145	gpp	2.20099e-110	0.68391	0.99	0.837	4.40198e-107	GC I
146	Cyt-c1L	3.1088e-110	0.425752	0.795	0.291	6.21761e-107	GC I
147	CG5059	4.49501e-110	0.764699	0.934	0.624	8.99001e-107	GC I
148	Syx13	4.04585e-109	0.611521	0.914	0.533	8.09171e-106	GC I
149	CG33181	4.72743e-109	0.547264	0.868	0.432	9.45485e-106	GC I
150	CG10880	7.76324e-109	0.737739	0.934	0.634	1.55265e-105	GC I
151	CG14464	8.87302e-109	0.683306	0.927	0.57	1.7746e-105	GC I
152	CG17625	1.01253e-108	0.329804	0.769	0.178	2.02506e-105	GC I
153	CG14036	1.90383e-108	0.644772	0.881	0.455	3.80767e-105	GC I
154	CG9272	3.33268e-108	0.557357	0.888	0.493	6.66537e-105	GC I
155	Reph	1.36156e-106	0.718813	0.921	0.624	2.72313e-103	GC I
156	qua	2.09254e-106	0.40723	0.805	0.288	4.18508e-103	GC I
157	Mink	2.39596e-106	0.712582	0.927	0.612	4.79192e-103	GC I
158	Rab27	1.43462e-105	0.508753	0.878	0.464	2.86925e-102	GC I
159	polo	1.93246e-105	0.644405	0.944	0.577	3.86491e-102	GC I
160	Mcm3	7.16707e-105	0.763417	0.934	0.717	1.43341e-101	GC I
161	dgt4	1.68806e-104	0.667756	0.917	0.6	3.37611e-101	GC I
162	l(2)k09913	1.85251e-104	0.641755	0.941	0.665	3.70501e-101	GC I
163	CG7945	3.15545e-104	0.574261	0.927	0.577	6.3109e-101	GC I
164	CR42862	5.32356e-104	0.681512	0.967	0.742	1.06471e-100	GC I
165	rad50	5.38553e-104	0.621787	0.927	0.615	1.07711e-100	GC I
166	pim	1.08833e-103	0.504946	0.888	0.442	2.17666e-100	GC I
167	CG1503	1.21293e-103	0.260815	0.772	0.228	2.42585e-100	GC I
168	His2Av	2.87671e-103	0.482225	1	0.999	5.75341e-100	GC I
169	CG4949	1.49197e-102	0.619073	0.871	0.464	2.98395e-99	GC I
170	Bgb	8.42162e-102	0.595163	0.875	0.509	1.68432e-98	GC I
171	CG9005	2.05433e-101	0.636399	0.937	0.605	4.10865e-98	GC I
172	Unr	6.62093e-101	0.564087	0.997	0.946	1.32419e-97	GC I
173	CG10336	1.43607e-100	0.680412	0.921	0.629	2.87214e-97	GC I
174	HP6	4.22554e-100	0.411451	0.743	0.136	8.45109e-97	GC I
175	CG32428	5.36115e-100	0.631678	0.983	0.829	1.07223e-96	GC I
176	CR43651	5.84937e-100	0.532369	0.868	0.515	1.16987e-96	GC I
177	dock	1.79365e-99	0.496014	0.888	0.499	3.5873e-96	GC I
178	RnrL	1.94976e-99	0.655108	0.917	0.633	3.89953e-96	GC I
179	Mcm5	9.85305e-99	0.656647	0.908	0.586	1.97061e-95	GC I
180	CG12721	1.18022e-98	0.407325	0.822	0.347	2.36043e-95	GC I
181	arm	1.40374e-98	0.649333	0.974	0.834	2.80748e-95	GC I
182	BicD	1.91975e-98	0.726548	0.921	0.752	3.8395e-95	GC I
183	CycA	3.67954e-98	0.718176	0.921	0.654	7.35909e-95	GC I
184	stx	4.43204e-98	0.679558	0.941	0.678	8.86408e-95	GC I
185	RhoGEF4	1.02042e-97	0.594704	0.921	0.597	2.04083e-94	GC I
186	CG14814	3.53903e-97	0.356031	0.875	0.45	7.07806e-94	GC I
187	bves	3.88297e-97	0.546708	0.934	0.604	7.76593e-94	GC I
188	Pxt	1.16012e-96	0.38941	0.785	0.268	2.32025e-93	GC I
189	fal	2.88167e-96	0.574249	0.875	0.497	5.76335e-93	GC I
190	Rpt3R	4.00044e-96	0.395144	0.825	0.411	8.00087e-93	GC I
191	CycJ	1.2407e-95	0.357052	0.805	0.353	2.4814e-92	GC I
192	CG4210	1.88034e-95	0.59397	0.908	0.578	3.76068e-92	GC I
193	Cap-D2	3.203e-95	0.472275	0.884	0.531	6.406e-92	GC I
194	nudE	1.71402e-94	0.628055	0.894	0.568	3.42803e-91	GC I
195	cmet	4.58102e-94	0.545574	0.894	0.56	9.16203e-91	GC I
196	Ts	4.88048e-94	0.769337	0.944	0.707	9.76095e-91	GC I
197	dnc	9.29449e-94	0.575217	0.881	0.455	1.8589e-90	GC I
198	CR43961	1.07271e-93	0.326448	0.743	0.165	2.14541e-90	GC I
199	CG1888	3.72842e-93	0.644072	0.937	0.717	7.45684e-90	GC I
200	CG14516	2.91923e-92	0.418191	0.805	0.318	5.83846e-89	GC I
201	Incenp	6.23975e-92	0.604809	0.974	0.719	1.24795e-88	GC I
202	Tsp39D	4.98228e-91	0.606629	0.901	0.607	9.96455e-88	GC I
203	aurA	6.6988e-91	0.428636	0.875	0.434	1.33976e-87	GC I
204	CR46148	8.65212e-91	0.260469	0.716	0.121	1.73042e-87	GC I
205	CG8173	3.18896e-89	0.551047	0.891	0.53	6.37793e-86	GC I
206	DNApol-alpha60	5.75101e-89	0.519039	0.875	0.555	1.1502e-85	GC I
207	CG9921	3.06283e-88	0.567964	0.917	0.606	6.12565e-85	GC I
208	glu	6.59709e-88	0.634487	0.941	0.755	1.31942e-84	GC I
209	CG17337	2.11351e-87	0.581907	0.871	0.506	4.22703e-84	GC I
210	CG34355	4.40751e-87	0.279428	0.749	0.263	8.81502e-84	GC I
211	CG32243	9.50897e-87	0.57518	0.937	0.668	1.90179e-83	GC I
212	CG9135	1.31243e-86	0.653068	0.944	0.659	2.62486e-83	GC I
213	vret	1.94903e-86	0.467568	0.865	0.475	3.89805e-83	GC I
214	CG42342	3.54737e-86	0.516397	0.828	0.446	7.09473e-83	GC I
215	CG7593	9.88569e-86	0.617325	0.947	0.73	1.97714e-82	GC I
216	Skp2	1.61283e-85	0.542366	0.898	0.577	3.22567e-82	GC I
217	Chd3	1.91349e-85	0.542695	0.858	0.491	3.82699e-82	GC I
218	CG31898	3.48462e-84	0.285786	0.795	0.405	6.96924e-81	GC I
219	CycB	7.49555e-84	0.650082	0.904	0.59	1.49911e-80	GC I
220	rdx	8.22935e-84	0.541426	0.934	0.708	1.64587e-80	GC I
221	Poc1	1.03059e-83	0.494366	0.881	0.563	2.06118e-80	GC I
222	agt	2.42624e-83	0.567461	0.868	0.595	4.85248e-80	GC I
223	CG12493	7.81714e-83	0.402684	0.723	0.181	1.56343e-79	GC I
224	PCNA	4.3485e-82	0.672978	0.98	0.878	8.69701e-79	GC I
225	rudhira	5.27499e-82	0.598984	0.95	0.77	1.055e-78	GC I
226	msd5	1.23567e-81	0.522228	0.914	0.62	2.47134e-78	GC I
227	CG43736	4.00448e-81	0.618955	0.96	0.797	8.00896e-78	GC I
228	tral	1.04435e-80	0.467889	1	0.956	2.08869e-77	GC I
229	Su(z)2	1.90412e-80	0.366108	0.894	0.546	3.80823e-77	GC I
230	Neos	4.7964e-80	0.487504	0.842	0.466	9.59279e-77	GC I
231	scramb1	2.10443e-79	0.56352	0.848	0.527	4.20885e-76	GC I
232	E(spl)m7-HLH	1.95839e-78	1.59839	0.894	0.665	3.91678e-75	GC I
233	G9a	2.6663e-78	0.573556	0.921	0.682	5.3326e-75	GC I
234	wde	4.45427e-78	0.597314	0.974	0.824	8.90853e-75	GC I
235	CG14561	6.37114e-78	0.535107	0.904	0.646	1.27423e-74	GC I
236	Cp1	1.39541e-77	0.453626	0.98	0.887	2.79081e-74	GC I
237	CR32207	4.17848e-77	0.439141	0.812	0.414	8.35697e-74	GC I
238	CG3655	7.24465e-77	0.501966	0.871	0.532	1.44893e-73	GC I
239	CR44833	2.39277e-76	0.313265	0.752	0.277	4.78553e-73	GC I
240	sbb	2.73883e-76	0.526912	0.983	0.886	5.47766e-73	GC I
241	CG14647	1.16317e-75	0.486661	0.884	0.588	2.32633e-72	GC I
242	CG30001	2.38791e-75	0.379342	0.815	0.418	4.77581e-72	GC I
243	CG6701	2.63486e-75	0.526292	0.908	0.622	5.26973e-72	GC I
244	norpA	2.84261e-75	0.4524	0.888	0.581	5.68522e-72	GC I
245	GLaz	7.47571e-75	0.404442	0.888	0.554	1.49514e-71	GC I
246	CG15309	1.35263e-74	0.441545	0.871	0.541	2.70525e-71	GC I
247	Lrch	3.10622e-74	0.408348	0.855	0.525	6.21245e-71	GC I
248	Cenp-C	3.47672e-74	0.504005	0.851	0.549	6.95344e-71	GC I
249	Rrp1	2.59432e-73	0.534507	0.937	0.712	5.18864e-70	GC I
250	CG43427	9.74417e-73	0.345063	0.911	0.573	1.94883e-69	GC I
251	Pur-alpha	3.60742e-72	0.486529	0.868	0.562	7.21484e-69	GC I
252	ncd	5.72781e-72	0.505201	0.924	0.663	1.14556e-68	GC I
253	chrb	1.17964e-71	0.485059	0.964	0.791	2.35928e-68	GC I
254	CG4004	1.64125e-71	0.489754	0.868	0.556	3.2825e-68	GC I
255	Msh6	2.1278e-71	0.366736	0.809	0.498	4.25559e-68	GC I
256	pbl	5.33429e-71	0.310246	0.868	0.527	1.06686e-67	GC I
257	BthD	1.0881e-70	0.543324	0.881	0.61	2.1762e-67	GC I
258	feo	6.62022e-70	0.407496	0.917	0.596	1.32404e-66	GC I
259	CG4570	6.62496e-70	0.571119	0.802	0.45	1.32499e-66	GC I
260	CG32767	6.63991e-70	0.526835	0.941	0.713	1.32798e-66	GC I
261	CG8097	2.34733e-69	0.446274	0.855	0.557	4.69466e-66	GC I
262	Paip2	3.11198e-69	0.337898	0.898	0.581	6.22396e-66	GC I
263	Nelf-E	5.26067e-69	0.335319	0.835	0.464	1.05213e-65	GC I
264	C1GalTA	7.14501e-69	0.384261	0.901	0.613	1.429e-65	GC I
265	Acf	1.52098e-68	0.505252	0.941	0.748	3.04196e-65	GC I
266	Pde9	1.6679e-68	0.332596	0.782	0.403	3.3358e-65	GC I
267	DNApol-alpha180	2.28702e-68	0.490894	0.861	0.587	4.57405e-65	GC I
268	CG12877	5.95507e-68	0.40399	0.868	0.568	1.19101e-64	GC I
269	Nuf2	6.5553e-68	0.407694	0.875	0.553	1.31106e-64	GC I
270	Fas1	1.25384e-67	0.472298	0.911	0.65	2.50767e-64	GC I
271	mxc	1.67681e-67	0.442463	0.838	0.542	3.35362e-64	GC I
272	scra	4.85645e-67	0.443619	0.941	0.665	9.7129e-64	GC I
273	Slbp	9.38152e-67	0.503999	0.944	0.846	1.8763e-63	GC I
274	CG10151	1.89074e-66	0.320777	0.733	0.377	3.78147e-63	GC I
275	Lk6	6.62308e-66	0.462306	0.993	0.962	1.32462e-62	GC I
276	CG14657	1.41374e-65	0.451471	0.825	0.534	2.82748e-62	GC I
277	UbcE2H	2.07671e-65	0.382688	0.914	0.598	4.15341e-62	GC I
278	CG13784	1.96046e-64	0.443534	0.835	0.547	3.92093e-61	GC I
279	hdm	2.05542e-64	0.362684	0.706	0.24	4.11084e-61	GC I
280	CG17574	3.05277e-64	0.433695	0.908	0.625	6.10554e-61	GC I
281	CG9328	3.33569e-64	0.429233	0.838	0.523	6.67137e-61	GC I
282	Ibf2	5.9132e-64	0.457301	0.957	0.769	1.18264e-60	GC I
283	CG43689	1.11553e-63	0.268185	0.71	0.321	2.23107e-60	GC I
284	pcs	1.4394e-63	0.462133	0.898	0.635	2.87881e-60	GC I
285	unc-119	2.52396e-63	0.496113	0.842	0.603	5.04791e-60	GC I
286	Rcc1	2.62221e-63	0.455416	0.98	0.885	5.24442e-60	GC I
287	dco	2.62567e-63	0.461924	0.894	0.632	5.25134e-60	GC I
288	Dsp1	5.72901e-63	0.566417	0.99	0.933	1.1458e-59	GC I
289	Mob2	6.3668e-63	0.463495	0.908	0.685	1.27336e-59	GC I
290	FASN3	8.11065e-63	0.336929	0.726	0.34	1.62213e-59	GC I
291	ATPsynepsilonL	1.19192e-62	0.354302	0.743	0.403	2.38384e-59	GC I
292	REPTOR-BP	2.39539e-62	0.427725	0.888	0.666	4.79077e-59	GC I
293	CR42254	5.50736e-62	0.440975	0.832	0.541	1.10147e-58	GC I
294	nesd	7.51517e-62	0.43921	0.891	0.618	1.50303e-58	GC I
295	CG34261	5.48847e-61	0.476415	0.789	0.457	1.09769e-57	GC I
296	CG9992	8.82827e-61	0.436035	0.851	0.584	1.76565e-57	GC I
297	NaCP60E	1.71742e-60	0.283213	0.855	0.527	3.43484e-57	GC I
298	fzy	1.76927e-60	0.39317	0.924	0.648	3.53853e-57	GC I
299	jigr1	2.37541e-60	0.449885	0.924	0.654	4.75082e-57	GC I
300	Syx1A	3.43702e-60	0.456904	0.941	0.803	6.87404e-57	GC I
301	tacc	5.09729e-60	0.461907	0.954	0.777	1.01946e-56	GC I
302	Hsp23	1.11027e-59	0.525333	1	0.882	2.22054e-56	GC I
303	hd	1.73294e-59	0.299839	0.818	0.509	3.46588e-56	GC I
304	Nxf3	2.27836e-59	0.279527	0.818	0.504	4.55672e-56	GC I
305	RhoBTB	3.89549e-59	0.413333	0.815	0.548	7.79099e-56	GC I
306	CR45667	5.80554e-59	0.37664	0.729	0.35	1.16111e-55	GC I
307	gnu	1.00049e-58	0.432479	0.759	0.417	2.00098e-55	GC I
308	Flo1	8.55579e-58	0.408801	0.911	0.695	1.71116e-54	GC I
309	mud	1.80845e-57	0.370639	0.835	0.583	3.61689e-54	GC I
310	jumu	2.20667e-57	0.438591	0.845	0.581	4.41335e-54	GC I
311	del	2.59986e-57	0.364022	0.736	0.352	5.19971e-54	GC I
312	cnn	8.1123e-57	0.277315	0.799	0.495	1.62246e-53	GC I
313	CG14207	8.64464e-57	0.405148	0.842	0.562	1.72893e-53	GC I
314	Baldspot	2.29008e-56	0.301171	0.848	0.529	4.58017e-53	GC I
315	wisp	3.71849e-56	0.258234	0.769	0.483	7.43699e-53	GC I
316	mms4	6.37327e-56	0.393568	0.746	0.449	1.27465e-52	GC I
317	skd	1.15929e-55	0.405843	0.924	0.753	2.31858e-52	GC I
318	CG44303	1.59253e-55	0.372588	0.812	0.49	3.18507e-52	GC I
319	DNApol-eta	6.48644e-55	0.280579	0.894	0.607	1.29729e-51	GC I
320	CG31125	2.18354e-54	0.349418	0.706	0.321	4.36708e-51	GC I
321	Gasz	2.56304e-54	0.310414	0.789	0.476	5.12609e-51	GC I
322	Adf1	1.02921e-53	0.364905	0.888	0.614	2.05842e-50	GC I
323	dup	1.36973e-53	0.444429	0.894	0.642	2.73945e-50	GC I
324	PhKgamma	1.90615e-53	0.365069	0.941	0.715	3.8123e-50	GC I
325	CG18190	3.00281e-53	0.37078	0.766	0.442	6.00563e-50	GC I
326	Syx4	1.44307e-52	0.251614	0.7	0.359	2.88614e-49	GC I
327	Sdc	2.36892e-52	0.379723	0.96	0.848	4.73784e-49	GC I
328	CG3630	2.37478e-52	0.393743	0.739	0.442	4.74956e-49	GC I
329	msps	5.60741e-52	0.419971	0.894	0.674	1.12148e-48	GC I
330	dnk	1.64633e-51	0.502722	0.95	0.771	3.29266e-48	GC I
331	me31B	3.99499e-51	0.366611	0.99	0.923	7.98997e-48	GC I
332	CG43062	4.63866e-51	0.262669	0.67	0.224	9.27733e-48	GC I
333	CG12702	6.02976e-51	0.251661	0.822	0.531	1.20595e-47	GC I
334	CG7130	7.4494e-51	0.28807	0.772	0.47	1.48988e-47	GC I
335	KrT95D	9.80559e-51	0.368637	0.858	0.628	1.96112e-47	GC I
336	CG2017	1.94535e-50	0.367376	0.818	0.53	3.89069e-47	GC I
337	Fer1HCH	2.05372e-50	0.384234	0.97	0.772	4.10745e-47	GC I
338	2021-09-04	2.51633e-50	0.299715	0.716	0.322	5.03265e-47	GC I
339	CG14438	9.02147e-50	0.416582	0.924	0.712	1.80429e-46	GC I
340	DNA-ligI	1.0853e-49	0.396044	0.848	0.611	2.1706e-46	GC I
341	Rcd-1r	1.20069e-49	0.321061	0.673	0.26	2.40137e-46	GC I
342	Bx	1.90236e-49	0.405418	0.789	0.541	3.80471e-46	GC I
343	tant	3.51287e-49	0.288477	0.769	0.489	7.02574e-46	GC I
344	CG30389	6.54469e-49	0.340909	0.845	0.58	1.30894e-45	GC I
345	how	7.92035e-49	0.318771	0.871	0.606	1.58407e-45	GC I
346	msb1l	9.3781e-49	0.284429	0.832	0.532	1.87562e-45	GC I
347	solo	1.40891e-48	0.386251	0.686	0.282	2.81782e-45	GC I
348	CR43857	2.54849e-48	0.4315	0.696	0.397	5.09698e-45	GC I
349	Tsp42Ef	5.81345e-48	0.306999	0.822	0.531	1.16269e-44	GC I
350	CG42232	1.32622e-47	0.475717	0.878	0.725	2.65244e-44	GC I
351	crq	1.39014e-47	0.299688	0.789	0.508	2.78028e-44	GC I
352	nonA-l	3.06915e-46	0.352091	0.739	0.463	6.1383e-43	GC I
353	dpa	1.87506e-45	0.389497	0.865	0.698	3.75012e-42	GC I
354	sip2	6.78782e-45	0.284742	0.871	0.6	1.35756e-41	GC I
355	grp	7.68059e-45	0.343791	0.934	0.755	1.53612e-41	GC I
356	CG11077	1.15395e-44	0.411374	0.914	0.81	2.3079e-41	GC I
357	Spn	1.38153e-44	0.368472	0.911	0.698	2.76306e-41	GC I
358	Spc105R	2.85488e-44	0.308651	0.795	0.532	5.70975e-41	GC I
359	CG14864	5.13147e-44	0.311286	0.693	0.388	1.02629e-40	GC I
360	CG12200	6.94432e-44	0.412142	0.7	0.396	1.38886e-40	GC I
361	l(3)L1231	9.74592e-44	0.454302	0.888	0.78	1.94918e-40	GC I
362	DNApol-alpha73	3.54788e-43	0.395491	0.769	0.539	7.09576e-40	GC I
363	Caf1-180	3.63379e-43	0.425069	0.908	0.769	7.26759e-40	GC I
364	tum	7.39438e-43	0.315293	0.835	0.568	1.47888e-39	GC I
365	CG8321	2.66731e-42	0.308873	0.752	0.487	5.33463e-39	GC I
366	CLIP-190	6.37682e-42	0.362753	0.898	0.742	1.27536e-38	GC I
367	Pcd	1.15418e-41	0.351366	0.848	0.626	2.30837e-38	GC I
368	Phf7	1.54415e-41	0.385891	0.739	0.528	3.0883e-38	GC I
369	bif	2.57021e-41	0.319189	0.934	0.722	5.14042e-38	GC I
370	spi	2.55442e-40	0.298922	0.838	0.551	5.10884e-37	GC I
371	Pdcd4	4.47788e-40	0.527099	0.997	0.992	8.95577e-37	GC I
372	sub	1.03612e-39	0.341703	0.789	0.584	2.07223e-36	GC I
373	CG9123	1.58635e-39	0.263215	0.696	0.404	3.1727e-36	GC I
374	heph	4.79685e-39	0.410018	0.957	0.878	9.5937e-36	GC I
375	CG5039	5.18534e-39	0.378486	0.723	0.483	1.03707e-35	GC I
376	CG7115	4.11319e-38	0.291749	0.723	0.47	8.22637e-35	GC I
377	Acer	1.96091e-37	0.31518	0.68	0.372	3.92181e-34	GC I
378	CycE	4.37734e-37	0.423925	0.792	0.611	8.75468e-34	GC I
379	Mcm6	8.57751e-37	0.345183	0.884	0.723	1.7155e-33	GC I
380	CG32280	1.12801e-35	0.368212	0.726	0.529	2.25603e-32	GC I
381	Cdk2	1.63634e-35	0.284992	0.868	0.652	3.27268e-32	GC I
382	CG7379	4.61077e-35	0.335688	0.759	0.526	9.22155e-32	GC I
383	CG30383	4.93929e-35	0.392764	0.67	0.405	9.87857e-32	GC I
384	ebd2	6.33673e-35	0.297562	0.68	0.387	1.26735e-31	GC I
385	ref(2)P	1.37421e-34	0.319207	0.855	0.679	2.74843e-31	GC I
386	S	2.41204e-34	0.328383	0.792	0.584	4.82408e-31	GC I
387	RpA-70	3.52888e-34	0.308143	0.865	0.667	7.05777e-31	GC I
388	betaTub56D	4.26374e-34	0.285124	1	0.999	8.52748e-31	GC I
389	CG32971	4.54953e-34	0.287398	0.594	0.127	9.09907e-31	GC I
390	BigH1	5.03629e-34	0.280206	0.706	0.479	1.00726e-30	GC I
391	piwi	1.05347e-33	0.335886	0.901	0.755	2.10694e-30	GC I
392	Gnf1	1.72871e-33	0.339006	0.914	0.76	3.45742e-30	GC I
393	tud	1.77302e-33	0.365675	0.828	0.703	3.54604e-30	GC I
394	dap	1.84521e-33	0.350086	0.894	0.735	3.69042e-30	GC I
395	CG5885	2.87981e-33	0.266431	1	0.984	5.75962e-30	GC I
396	Rab35	3.88225e-33	0.308948	0.924	0.796	7.7645e-30	GC I
397	CG1910	1.45158e-32	0.313074	0.993	0.978	2.90315e-29	GC I
398	CG12018	1.51712e-32	0.267731	0.789	0.574	3.03425e-29	GC I
399	CG12576	2.03435e-32	0.288057	0.825	0.627	4.0687e-29	GC I
400	GlyS	3.37417e-31	0.253957	0.789	0.59	6.74834e-28	GC I
401	CG10063	1.38015e-30	0.266204	0.752	0.479	2.7603e-27	GC I
402	CG32264	4.85506e-30	0.284683	0.911	0.742	9.71012e-27	GC I
403	CG14545	5.05363e-30	0.356961	0.696	0.469	1.01073e-26	GC I
404	lok	6.10202e-30	0.336553	0.805	0.659	1.2204e-26	GC I
405	Ote	7.53014e-30	0.338192	0.878	0.728	1.50603e-26	GC I
406	CG6927	1.22875e-29	0.299381	0.64	0.347	2.4575e-26	GC I
407	Mcm7	1.27147e-29	0.339213	0.809	0.659	2.54293e-26	GC I
408	Cks30A	6.52755e-29	0.323449	0.779	0.571	1.30551e-25	GC I
409	Orc6	9.72223e-29	0.281983	0.713	0.533	1.94445e-25	GC I
410	CG34401	1.87747e-28	0.276398	0.871	0.689	3.75495e-25	GC I
411	CG12795	4.37348e-27	0.25208	0.802	0.623	8.74696e-24	GC I
412	CG9752	8.19715e-27	0.277093	0.881	0.785	1.63943e-23	GC I
413	CR44417	9.8312e-27	0.335415	0.729	0.557	1.96624e-23	GC I
414	CG11885	2.00048e-26	0.258103	0.921	0.762	4.00096e-23	GC I
415	CR31044	6.01298e-26	0.526132	0.878	0.818	1.2026e-22	GC I
416	Pi3K68D	4.91822e-25	0.286972	0.673	0.48	9.83644e-22	GC I
417	CG12163	1.49053e-24	0.275156	0.828	0.727	2.98106e-21	GC I
418	Fer2LCH	1.76966e-24	0.301043	0.967	0.863	3.53931e-21	GC I
419	sle	6.07042e-23	0.251579	0.904	0.771	1.21408e-19	GC I
420	bun	5.58146e-22	0.277866	0.96	0.916	1.11629e-18	GC I
421	CG5757	2.27981e-21	0.277738	0.828	0.763	4.55962e-18	GC I
422	Psc	4.77501e-21	0.278579	0.875	0.786	9.55001e-18	GC I
423	Mcm2	1.65465e-19	0.282484	0.756	0.624	3.3093e-16	GC I
424	Klp61F	6.2651e-18	0.251165	0.726	0.576	1.25302e-14	GC I
425	Orc1	4.39644e-12	0.2721	0.67	0.579	8.79288e-09	GC I
426	CR43264	1.65254e-08	0.251266	0.776	0.635	3.30508e-05	GC I
427	bru1	0	2.61807	0.999	0.467	0	GC II
428	BigH1	0	1.62239	0.969	0.456	0	GC II
429	CG32625	0	1.40651	0.907	0.426	0	GC II
430	ovo	0	1.38836	0.916	0.388	0	GC II
431	zpg	0	1.34982	0.957	0.364	0	GC II
432	Jabba	0	1.3033	0.861	0.433	0	GC II
433	CG11674	0	1.29588	0.934	0.371	0	GC II
434	gnu	0	1.28075	0.931	0.396	0	GC II
435	AGO3	0	1.2754	0.939	0.377	0	GC II
436	His3.3B	0	1.2423	0.999	0.968	0	GC II
437	CG6770	0	1.20447	1	0.979	0	GC II
438	wisp	0	1.20055	0.902	0.466	0	GC II
439	CG1943	0	1.19583	0.998	0.852	0	GC II
440	osk	0	1.16311	0.865	0.469	0	GC II
441	Fer1HCH	0	1.11114	0.978	0.764	0	GC II
442	CG4502	0	1.07746	0.988	0.819	0	GC II
443	CG11899	0	1.03775	0.929	0.598	0	GC II
444	aub	0	1.03712	0.936	0.383	0	GC II
445	Reph	0	1.0268	0.948	0.613	0	GC II
446	stet	0	1.0155	0.921	0.34	0	GC II
447	alphaTub67C	0	1.01384	0.902	0.318	0	GC II
448	Smn	0	0.993559	0.974	0.697	0	GC II
449	yl	0	0.987028	0.856	0.426	0	GC II
450	CG32428	0	0.969664	0.974	0.824	0	GC II
451	CG14036	0	0.949614	0.901	0.439	0	GC II
452	Dhit	0	0.892051	0.862	0.406	0	GC II
453	akirin	0	0.856416	0.999	0.993	0	GC II
454	CG12721	0	0.83753	0.86	0.329	0	GC II
455	CG1890	0	0.825776	0.965	0.777	0	GC II
456	CG5194	0	0.82516	0.888	0.255	0	GC II
457	CG9926	0	0.821896	0.888	0.355	0	GC II
458	CG3831	0	0.807345	0.9	0.457	0	GC II
459	stil	0	0.769813	0.843	0.259	0	GC II
460	CG12355	0	0.765974	0.833	0.336	0	GC II
461	orb	0	0.765618	0.843	0.355	0	GC II
462	vas	0	0.757892	0.86	0.343	0	GC II
463	otu	0	0.678687	0.841	0.326	0	GC II
464	SK	0	0.539101	0.729	0.071	0	GC II
465	Pcd	1.8898e-307	0.870135	0.918	0.615	3.7796e-304	GC II
466	CycB	9.59151e-306	1.19753	0.942	0.577	1.9183e-302	GC II
467	rdx	1.60918e-301	0.943661	0.938	0.7	3.21836e-298	GC II
468	pncr009:3L	2.51032e-300	0.8598	0.924	0.6	5.02064e-297	GC II
469	dhd	3.31517e-298	2.96292	0.887	0.494	6.63034e-295	GC II
470	Corp	2.07555e-295	0.718016	0.813	0.286	4.1511e-292	GC II
471	Cyp6v1	2.53477e-292	0.764776	0.921	0.629	5.06954e-289	GC II
472	endos	1.22119e-290	0.830117	0.983	0.906	2.44238e-287	GC II
473	shep	6.86387e-287	1.01739	0.969	0.807	1.37277e-283	GC II
474	c(3)G	2.46494e-286	1.10563	0.859	0.469	4.92988e-283	GC II
475	CG17337	1.48585e-284	0.759169	0.877	0.493	2.9717e-281	GC II
476	CG14464	3.17139e-284	0.785442	0.896	0.559	6.34277e-281	GC II
477	CG4570	7.30253e-284	0.750968	0.866	0.434	1.46051e-280	GC II
478	exu	5.94622e-283	0.860023	0.823	0.393	1.18924e-279	GC II
479	tej	3.23271e-282	0.550871	0.783	0.23	6.46542e-279	GC II
480	CG14516	2.95261e-281	0.587292	0.799	0.301	5.90521e-278	GC II
481	Oda	1.21989e-280	0.789293	0.999	0.987	2.43977e-277	GC II
482	CG14545	7.22471e-279	1.08442	0.855	0.452	1.44494e-275	GC II
483	CG4842	2.0273e-277	0.440681	0.701	0.111	4.05461e-274	GC II
484	CG14647	5.38964e-277	0.8207	0.886	0.577	1.07793e-273	GC II
485	Ggt-1	2.97107e-276	0.772369	0.871	0.493	5.94214e-273	GC II
486	Idgf6	4.62512e-275	0.96772	0.849	0.465	9.25024e-272	GC II
487	Drep2	6.56924e-273	0.701256	0.836	0.435	1.31385e-269	GC II
488	Pdcd4	1.11787e-272	0.748143	0.998	0.991	2.23574e-269	GC II
489	Tl	5.63561e-270	0.341928	0.722	0.129	1.12712e-266	GC II
490	Ssb-c31a	4.92188e-266	0.831786	0.994	0.967	9.84376e-263	GC II
491	Tao	1.05865e-264	0.762792	0.914	0.691	2.11731e-261	GC II
492	CG18190	2.0326e-260	0.682395	0.833	0.427	4.06521e-257	GC II
493	glob1	1.15672e-258	0.524632	0.833	0.439	2.31343e-255	GC II
494	cona	1.88196e-255	0.897448	0.817	0.342	3.76393e-252	GC II
495	Unr	1.14543e-254	0.898154	0.985	0.944	2.29085e-251	GC II
496	CG32473	5.7246e-254	0.673859	0.862	0.526	1.14492e-250	GC II
497	CG8180	5.77613e-253	0.712087	0.808	0.376	1.15523e-249	GC II
498	CG33181	2.48687e-250	0.685693	0.814	0.419	4.97375e-247	GC II
499	mtrm	4.12773e-249	0.572043	0.791	0.388	8.25546e-246	GC II
500	Cks85A	4.44735e-248	0.815147	0.939	0.745	8.89471e-245	GC II
501	CG2678	5.78234e-247	0.495009	0.787	0.407	1.15647e-243	GC II
502	l(3)02640	1.02097e-246	0.652363	0.937	0.699	2.04194e-243	GC II
503	RpS19b	8.6937e-244	1.16857	0.85	0.453	1.73874e-240	GC II
504	CG3655	1.03793e-243	0.818348	0.871	0.52	2.07585e-240	GC II
505	GILT3	4.37246e-243	0.429198	0.714	0.189	8.74491e-240	GC II
506	CG11596	2.94799e-241	0.698227	0.875	0.575	5.89597e-238	GC II
507	CG9992	2.36117e-240	0.683252	0.888	0.572	4.72234e-237	GC II
508	plu	3.61862e-239	0.405555	0.715	0.22	7.23723e-236	GC II
509	CR32207	2.0579e-236	0.618429	0.805	0.4	4.11579e-233	GC II
510	skd	8.78481e-236	0.645691	0.937	0.747	1.75696e-232	GC II
511	swa	1.18471e-235	0.726496	0.793	0.396	2.36942e-232	GC II
512	rpk	1.53266e-235	0.586763	0.784	0.357	3.06532e-232	GC II
513	pgc	3.74018e-235	0.845172	0.807	0.473	7.48036e-232	GC II
514	CG10326	3.22945e-234	0.673849	0.913	0.661	6.45889e-231	GC II
515	lok	1.22776e-232	0.891642	0.9	0.649	2.45552e-229	GC II
516	krimp	1.60571e-228	0.489442	0.815	0.484	3.21142e-225	GC II
517	Akap200	3.10295e-227	0.705867	0.965	0.828	6.20589e-224	GC II
518	tral	7.69147e-227	0.679268	0.981	0.955	1.53829e-223	GC II
519	CG43658	2.28493e-226	0.847094	0.892	0.632	4.56985e-223	GC II
520	Idgf4	1.12508e-222	0.558378	0.782	0.382	2.25016e-219	GC II
521	CG9925	1.7043e-220	0.485618	0.779	0.404	3.40861e-217	GC II
522	GstE11	4.08332e-220	0.530762	0.791	0.426	8.16664e-217	GC II
523	Gs1	1.01524e-216	0.545068	0.761	0.358	2.03049e-213	GC II
524	Nost	1.63649e-216	0.870821	0.817	0.51	3.27299e-213	GC II
525	Chrac-14	7.54794e-216	0.646537	0.944	0.772	1.50959e-212	GC II
526	CG7054	1.05392e-215	0.454842	0.778	0.41	2.10784e-212	GC II
527	CG31053	4.80226e-213	0.516003	0.741	0.337	9.60451e-210	GC II
528	Src64B	7.93528e-212	0.779759	0.865	0.576	1.58706e-208	GC II
529	Rab35	1.24564e-211	0.707174	0.924	0.791	2.49129e-208	GC II
530	Cyp6a19	2.73207e-211	0.310437	0.731	0.344	5.46414e-208	GC II
531	Mkp3	4.31201e-210	0.645884	0.903	0.661	8.62401e-207	GC II
532	ea	5.63981e-210	0.408729	0.743	0.348	1.12796e-206	GC II
533	CG11897	1.41981e-209	0.480793	0.762	0.406	2.83963e-206	GC II
534	CG12200	6.1585e-209	0.715281	0.75	0.383	1.2317e-205	GC II
535	CR32027	8.46811e-209	0.46026	0.748	0.311	1.69362e-205	GC II
536	CG34323	1.90474e-208	0.694852	0.741	0.253	3.80948e-205	GC II
537	CG2556	1.08764e-207	0.375448	0.763	0.374	2.17528e-204	GC II
538	2021-09-04	9.73101e-207	0.461975	0.746	0.307	1.9462e-203	GC II
539	mei-P26	1.42564e-206	0.839712	0.952	0.821	2.85127e-203	GC II
540	GstT3	6.84708e-205	0.4399	0.8	0.491	1.36942e-201	GC II
541	ZnT35C	1.52518e-204	0.809779	0.773	0.403	3.05037e-201	GC II
542	CG11739	6.0187e-204	0.381295	0.798	0.486	1.20374e-200	GC II
543	dnc	6.10433e-203	0.635234	0.799	0.444	1.22087e-199	GC II
544	RpS5b	7.1337e-203	0.666176	1	0.998	1.42674e-199	GC II
545	qua	1.84781e-200	0.373357	0.706	0.275	3.69562e-197	GC II
546	gammaTub37C	2.64264e-198	0.320664	0.67	0.183	5.28529e-195	GC II
547	CG15820	2.82898e-198	0.458313	0.706	0.303	5.65795e-195	GC II
548	retn	5.8846e-198	0.364173	0.699	0.251	1.17692e-194	GC II
549	CG44774	1.34207e-197	0.756329	0.924	0.762	2.68414e-194	GC II
550	TfIIA-S	7.34499e-197	0.571901	0.986	0.973	1.469e-193	GC II
551	yin	3.87029e-195	0.419082	0.724	0.334	7.74058e-192	GC II
552	CG7208	2.32264e-194	0.422271	0.721	0.324	4.64528e-191	GC II
553	fal	5.63691e-194	0.609667	0.802	0.488	1.12738e-190	GC II
554	CG30377	6.34442e-194	0.488513	0.773	0.444	1.26888e-190	GC II
555	CG44838	5.45586e-193	0.46375	0.808	0.467	1.09117e-189	GC II
556	CG14931	2.39943e-190	0.396179	0.711	0.25	4.79887e-187	GC II
557	Syx1A	1.92167e-189	0.660766	0.939	0.798	3.84334e-186	GC II
558	CG15891	2.06611e-188	0.656039	0.843	0.558	4.13221e-185	GC II
559	DNApol-eta	8.01278e-188	0.532745	0.866	0.599	1.60256e-184	GC II
560	CG9123	2.20888e-183	0.38625	0.741	0.391	4.41775e-180	GC II
561	psq	1.35962e-182	0.646245	0.949	0.831	2.71923e-179	GC II
562	CG10880	3.24823e-182	0.600069	0.859	0.628	6.49647e-179	GC II
563	sina	5.7812e-182	0.696402	0.934	0.759	1.15624e-178	GC II
564	bgm	3.35041e-180	0.402391	0.672	0.209	6.70081e-177	GC II
565	Rcd5	4.67927e-179	0.555819	0.901	0.651	9.35854e-176	GC II
566	Phf7	6.50289e-179	0.481062	0.789	0.517	1.30058e-175	GC II
567	Pde9	1.19352e-178	0.541531	0.739	0.393	2.38705e-175	GC II
568	jigr1	2.38527e-177	0.598944	0.893	0.647	4.77054e-174	GC II
569	RpS10a	3.22783e-177	0.807324	0.73	0.353	6.45565e-174	GC II
570	NaPi-III	5.68471e-177	0.575769	0.783	0.456	1.13694e-173	GC II
571	del	8.49051e-176	0.471964	0.732	0.339	1.6981e-172	GC II
572	CG14814	2.25728e-175	0.516219	0.758	0.442	4.51455e-172	GC II
573	QC	1.35425e-174	0.41196	0.711	0.342	2.7085e-171	GC II
574	Fer2LCH	5.17462e-174	0.608895	0.974	0.859	1.03492e-170	GC II
575	CG12207	5.4397e-173	0.409057	0.796	0.521	1.08794e-169	GC II
576	gpp	1.53459e-172	0.619954	0.944	0.834	3.06918e-169	GC II
577	stx	4.51179e-172	0.721801	0.884	0.672	9.02358e-169	GC II
578	Mad	1.96272e-170	0.625701	0.85	0.608	3.92544e-167	GC II
579	CycJ	9.47369e-170	0.390132	0.706	0.343	1.89474e-166	GC II
580	feo	1.01376e-169	0.521406	0.85	0.589	2.02752e-166	GC II
581	Prip	3.47162e-169	0.87561	0.734	0.365	6.94323e-166	GC II
582	RPA2	5.49875e-168	0.574261	0.953	0.814	1.09975e-164	GC II
583	Spn	6.60668e-168	0.570517	0.891	0.691	1.32134e-164	GC II
584	mnb	3.20673e-166	0.549685	0.963	0.872	6.41346e-163	GC II
585	CG9705	4.1769e-166	0.503796	0.869	0.659	8.35381e-163	GC II
586	RfC4	2.17018e-165	0.500744	0.971	0.894	4.34036e-162	GC II
587	CG10863	8.93149e-165	0.526071	0.786	0.466	1.7863e-161	GC II
588	me31B	2.41579e-164	0.786689	0.968	0.922	4.83158e-161	GC II
589	chn	1.63425e-163	0.46224	0.805	0.514	3.2685e-160	GC II
590	Trf4-2	2.62123e-163	0.273475	0.658	0.238	5.24245e-160	GC II
591	GlyS	5.22781e-163	0.499855	0.818	0.581	1.04556e-159	GC II
592	CG7840	2.48205e-162	0.532822	0.872	0.683	4.9641e-159	GC II
593	Nipped-B	8.06592e-162	0.638259	0.957	0.924	1.61318e-158	GC II
594	Gasz	1.04987e-159	0.447092	0.768	0.466	2.09974e-156	GC II
595	Ubi-p5E	1.08326e-158	0.641071	0.938	0.815	2.16652e-155	GC II
596	S	2.05057e-157	0.493945	0.825	0.575	4.10114e-154	GC II
597	Dsp1	2.72469e-157	0.818347	0.974	0.932	5.44938e-154	GC II
598	ebd2	3.98177e-157	0.388769	0.71	0.375	7.96355e-154	GC II
599	dco	2.02142e-156	0.553431	0.85	0.625	4.04285e-153	GC II
600	CG13631	5.59702e-156	0.355974	0.719	0.361	1.1194e-152	GC II
601	grp	1.47902e-154	0.528896	0.903	0.75	2.95804e-151	GC II
602	dpr6	3.38255e-154	0.401415	0.677	0.307	6.76511e-151	GC II
603	Syn1	3.47666e-154	0.317966	0.642	0.213	6.95333e-151	GC II
604	nAChRalpha3	6.17458e-154	0.373632	0.737	0.387	1.23492e-150	GC II
605	Mnt	8.80015e-154	0.476301	0.848	0.627	1.76003e-150	GC II
606	rhi	7.92232e-153	0.557697	0.705	0.351	1.58446e-149	GC II
607	Baldspot	9.9515e-153	0.41797	0.807	0.52	1.9903e-149	GC II
608	CG32767	4.36315e-152	0.507305	0.884	0.708	8.72631e-149	GC II
609	GILT1	7.16844e-151	0.514756	0.938	0.82	1.43369e-147	GC II
610	fz	1.45649e-150	0.284273	0.71	0.374	2.91298e-147	GC II
611	CG14932	1.51007e-150	0.61593	0.665	0.216	3.02013e-147	GC II
612	Oxp	1.10209e-149	0.423408	0.699	0.347	2.20418e-146	GC II
613	goe	3.9564e-149	0.259226	0.67	0.294	7.9128e-146	GC II
614	Trf2	4.45889e-149	0.646502	0.957	0.89	8.91778e-146	GC II
615	CycA	5.03376e-149	0.526155	0.859	0.648	1.00675e-145	GC II
616	CG13148	2.1837e-148	0.26081	0.651	0.284	4.3674e-145	GC II
617	CG8173	1.26782e-147	0.441836	0.807	0.522	2.53564e-144	GC II
618	CG6767	1.88494e-147	0.470205	0.996	0.993	3.76988e-144	GC II
619	ced-6	3.74346e-147	0.483806	0.768	0.467	7.48692e-144	GC II
620	Tsp66E	8.50525e-147	0.309396	0.69	0.393	1.70105e-143	GC II
621	CG4753	2.19584e-146	0.416522	0.724	0.421	4.39167e-143	GC II
622	26-29-p	1.27956e-145	0.695985	0.913	0.828	2.55911e-142	GC II
623	CG15309	2.22575e-145	0.531032	0.786	0.535	4.45149e-142	GC II
624	CG15047	1.25388e-143	0.574969	0.688	0.337	2.50775e-140	GC II
625	arm	1.33489e-143	0.47772	0.952	0.83	2.66978e-140	GC II
626	CG5059	1.17549e-142	0.869763	0.8	0.621	2.35097e-139	GC II
627	fbp	2.07362e-142	0.366729	0.731	0.453	4.14723e-139	GC II
628	CG9005	3.25995e-142	0.471238	0.817	0.6	6.5199e-139	GC II
629	Rbp9	7.97434e-142	0.571018	0.682	0.305	1.59487e-138	GC II
630	dgt4	1.08044e-141	0.458185	0.835	0.593	2.16087e-138	GC II
631	CG43191	1.44128e-141	0.49696	0.612	0.2	2.88257e-138	GC II
632	ade3	3.05716e-140	0.562338	0.865	0.706	6.11433e-137	GC II
633	AGBE	8.30927e-140	0.446095	0.817	0.58	1.66185e-136	GC II
634	CR44417	4.24706e-139	0.435287	0.794	0.548	8.49412e-136	GC II
635	CG30389	1.14827e-138	0.46962	0.799	0.573	2.29654e-135	GC II
636	CR43961	2.2235e-138	0.257047	0.601	0.152	4.44701e-135	GC II
637	Swip-1	4.37187e-138	0.368204	0.701	0.412	8.74374e-135	GC II
638	CG7154	5.8742e-138	0.53731	0.888	0.713	1.17484e-134	GC II
639	nmo	9.76459e-138	0.586817	0.963	0.917	1.95292e-134	GC II
640	CG6175	1.78474e-137	0.484726	0.874	0.688	3.56949e-134	GC II
641	CG34401	1.28759e-136	0.46035	0.879	0.683	2.57518e-133	GC II
642	GstE6	3.4678e-136	0.459723	0.674	0.35	6.9356e-133	GC II
643	smg	9.14518e-136	0.460216	0.768	0.515	1.82904e-132	GC II
644	gcl	2.15187e-135	0.391403	0.773	0.545	4.30374e-132	GC II
645	CG45050	3.1787e-135	0.536738	0.934	0.812	6.35739e-132	GC II
646	pcs	1.08355e-134	0.492404	0.813	0.63	2.16711e-131	GC II
647	mnd	2.11582e-134	0.561282	0.725	0.461	4.23163e-131	GC II
648	CR45667	1.70322e-133	0.77753	0.675	0.34	3.40643e-130	GC II
649	CG8289	5.85277e-133	0.466608	0.854	0.659	1.17055e-129	GC II
650	Parp	2.18577e-132	0.667027	0.96	0.92	4.37154e-129	GC II
651	Nxf3	2.46833e-132	0.401133	0.748	0.497	4.93665e-129	GC II
652	UbcE2H	4.61255e-132	0.474737	0.813	0.593	9.22509e-129	GC II
653	CG45071	5.41676e-132	0.387276	0.696	0.462	1.08335e-128	GC II
654	CG13397	1.01842e-131	0.380654	0.677	0.412	2.03683e-128	GC II
655	G9a	1.13763e-131	0.493705	0.849	0.677	2.27527e-128	GC II
656	sn	8.54289e-131	0.353974	0.746	0.495	1.70858e-127	GC II
657	Rbfox1	1.42582e-130	0.535916	0.884	0.744	2.85163e-127	GC II
658	Spn27A	1.72405e-130	0.44219	0.809	0.56	3.44809e-127	GC II
659	rt	1.91253e-130	0.297297	0.631	0.264	3.82506e-127	GC II
660	CG6293	2.42876e-130	0.366804	0.646	0.285	4.85751e-127	GC II
661	BthD	2.1295e-129	0.611159	0.829	0.604	4.25901e-126	GC II
662	SKIP	1.88853e-128	0.326895	0.703	0.424	3.77706e-125	GC II
663	pbl	3.25154e-128	0.333599	0.783	0.52	6.50308e-125	GC II
664	CG30001	2.45556e-127	0.354869	0.705	0.411	4.91112e-124	GC II
665	CG7945	3.71339e-127	0.462855	0.796	0.572	7.42677e-124	GC II
666	qin	1.28572e-126	0.57044	0.667	0.302	2.57144e-123	GC II
667	Tpc1	7.38179e-126	0.347259	0.762	0.525	1.47636e-122	GC II
668	CR43144	4.92823e-125	0.287666	0.678	0.411	9.85647e-122	GC II
669	CG9921	5.37456e-125	0.575932	0.794	0.602	1.07491e-121	GC II
670	stai	6.18123e-124	0.451079	0.968	0.759	1.23625e-120	GC II
671	D2hgdh	2.20925e-123	0.38932	0.736	0.464	4.4185e-120	GC II
672	Nelf-E	6.65852e-123	0.419369	0.73	0.457	1.3317e-119	GC II
673	clos	2.78064e-122	0.318632	0.657	0.377	5.56128e-119	GC II
674	eIF4G2	1.13386e-121	0.593311	0.86	0.696	2.26773e-118	GC II
675	Lsd-2	1.84172e-120	0.320316	0.771	0.521	3.68345e-117	GC II
676	CG7091	3.37851e-120	0.350823	0.638	0.331	6.75702e-117	GC II
677	glec	4.01518e-120	0.457551	0.927	0.74	8.03037e-117	GC II
678	APC7	5.30362e-120	0.327559	0.646	0.317	1.06072e-116	GC II
679	Ect4	1.39337e-119	0.407373	0.76	0.524	2.78674e-116	GC II
680	nudE	2.78028e-119	0.499092	0.792	0.562	5.56056e-116	GC II
681	CG8177	8.61998e-119	0.423814	0.778	0.552	1.724e-115	GC II
682	Pcl	1.98582e-118	0.405797	0.833	0.616	3.97165e-115	GC II
683	Acer	2.51682e-117	0.308968	0.649	0.363	5.03363e-114	GC II
684	CG8490	2.53403e-117	0.433557	0.784	0.551	5.06805e-114	GC II
685	spd-2	1.67715e-116	0.289072	0.753	0.517	3.35431e-113	GC II
686	corolla	3.80079e-116	0.494146	0.669	0.368	7.60158e-113	GC II
687	CG5281	7.43538e-116	0.319801	0.623	0.255	1.48708e-112	GC II
688	CtBP	7.77383e-116	0.543137	0.991	0.984	1.55477e-112	GC II
689	CG4004	1.3708e-115	0.397489	0.784	0.55	2.74159e-112	GC II
690	shot	1.61735e-115	0.449611	0.827	0.659	3.23471e-112	GC II
691	CG33229	1.78201e-115	0.543581	0.912	0.825	3.56402e-112	GC II
692	Rcd-1	1.79317e-115	0.401619	0.913	0.781	3.58633e-112	GC II
693	InR	2.71396e-115	0.534625	0.88	0.705	5.42792e-112	GC II
694	CG14207	2.90078e-115	0.425587	0.778	0.556	5.80156e-112	GC II
695	CG2201	8.93879e-115	0.31738	0.642	0.312	1.78776e-111	GC II
696	GILT2	2.65373e-114	0.391284	0.659	0.366	5.30746e-111	GC II
697	CG6540	8.10171e-114	0.375265	0.898	0.744	1.62034e-110	GC II
698	RhoBTB	7.59574e-113	0.382789	0.763	0.542	1.51915e-109	GC II
699	Jupiter	9.8365e-113	0.289452	1	0.982	1.9673e-109	GC II
700	gb	1.60447e-112	0.44148	0.758	0.56	3.20894e-109	GC II
701	CG18622	1.76778e-112	0.27088	0.639	0.312	3.53555e-109	GC II
702	CG15771	6.04247e-112	0.426653	0.83	0.681	1.20849e-108	GC II
703	rudhira	2.05812e-111	0.543904	0.9	0.766	4.11624e-108	GC II
704	PhKgamma	2.35015e-111	0.39202	0.884	0.71	4.7003e-108	GC II
705	Lk6	7.66615e-111	0.407043	0.986	0.962	1.53323e-107	GC II
706	Gip	3.19761e-110	0.427634	0.833	0.615	6.39522e-107	GC II
707	CG10208	1.85863e-109	0.341601	0.657	0.405	3.71725e-106	GC II
708	CG9272	3.23406e-109	0.288354	0.737	0.488	6.46812e-106	GC II
709	CG32521	1.2754e-108	0.404505	0.732	0.491	2.5508e-105	GC II
710	dap	3.10841e-108	0.498508	0.871	0.73	6.21681e-105	GC II
711	sbb	7.56731e-108	0.527635	0.918	0.886	1.51346e-104	GC II
712	scramb1	3.5603e-107	0.431059	0.729	0.522	7.1206e-104	GC II
713	Pxt	3.51471e-106	0.255826	0.613	0.259	7.02941e-103	GC II
714	regucalcin	4.40977e-106	0.329146	0.713	0.486	8.81953e-103	GC II
715	trsn	9.22811e-106	0.510668	0.916	0.799	1.84562e-102	GC II
716	CG6287	2.6415e-105	0.672637	0.973	0.948	5.28299e-102	GC II
717	CG5757	3.2202e-103	0.377907	0.895	0.757	6.44039e-100	GC II
718	GstO1	4.41878e-103	0.381122	0.798	0.593	8.83755e-100	GC II
719	Sodh-2	9.38355e-103	0.278669	0.689	0.473	1.87671e-99	GC II
720	grk	1.03324e-102	0.360161	0.629	0.333	2.06647e-99	GC II
721	CG12744	2.95716e-101	0.372602	0.898	0.741	5.91433e-98	GC II
722	fs(1)Ya	5.02002e-101	0.467875	0.665	0.429	1.004e-97	GC II
723	CG12576	2.32629e-99	0.430921	0.815	0.621	4.65259e-96	GC II
724	CG42342	6.25119e-99	0.466657	0.672	0.442	1.25024e-95	GC II
725	ball	6.29165e-99	0.388546	0.893	0.737	1.25833e-95	GC II
726	Nse1	3.32753e-98	0.318065	0.736	0.496	6.65506e-95	GC II
727	Bsg	1.12288e-97	0.458193	0.954	0.912	2.24576e-94	GC II
728	C1GalTA	2.05472e-97	0.428196	0.761	0.611	4.10944e-94	GC II
729	dl	2.62226e-97	0.305142	0.638	0.352	5.24451e-94	GC II
730	Pka-C1	2.7903e-97	0.532359	0.851	0.695	5.5806e-94	GC II
731	agt	5.695e-97	0.373224	0.782	0.59	1.139e-93	GC II
732	CR45666	3.23959e-96	0.272479	0.617	0.321	6.47918e-93	GC II
733	Incenp	1.45487e-95	0.388428	0.88	0.715	2.90973e-92	GC II
734	Neos	1.74888e-95	0.317162	0.716	0.46	3.49775e-92	GC II
735	msd1	2.92121e-95	0.329812	0.793	0.545	5.84242e-92	GC II
736	ftz-f1	3.16854e-95	0.376937	0.731	0.523	6.33707e-92	GC II
737	CG42260	6.01963e-95	0.510849	0.574	0.183	1.20393e-91	GC II
738	Rcc1	6.61869e-95	0.529774	0.948	0.883	1.32374e-91	GC II
739	CG6701	7.58484e-95	0.342593	0.819	0.617	1.51697e-91	GC II
740	pav	1.92808e-94	0.340295	0.834	0.639	3.85615e-91	GC II
741	Sdc	2.3381e-94	0.409826	0.936	0.846	4.6762e-91	GC II
742	CG2017	3.03719e-94	0.324593	0.761	0.523	6.07437e-91	GC II
743	bves	3.64351e-94	0.40305	0.788	0.601	7.28701e-91	GC II
744	Hnf4	5.1581e-94	0.402176	0.746	0.581	1.03162e-90	GC II
745	CG8321	8.66785e-94	0.271032	0.715	0.48	1.73357e-90	GC II
746	CG2247	8.79037e-94	0.412154	0.768	0.589	1.75807e-90	GC II
747	nonA-l	1.89116e-93	0.292324	0.682	0.456	3.78233e-90	GC II
748	CG1888	2.26964e-93	0.336912	0.862	0.713	4.53928e-90	GC II
749	CG12877	4.05213e-93	0.412929	0.739	0.565	8.10426e-90	GC II
750	PMP34	6.85971e-93	0.297335	0.713	0.485	1.37194e-89	GC II
751	mub	1.55539e-92	0.402706	0.841	0.686	3.11079e-89	GC II
752	aay	1.66417e-92	0.405342	0.823	0.67	3.32835e-89	GC II
753	chinmo	2.02108e-92	0.493553	0.629	0.342	4.04216e-89	GC II
754	KrT95D	3.17927e-92	0.380481	0.796	0.624	6.35855e-89	GC II
755	png	3.418e-92	0.267388	0.664	0.449	6.836e-89	GC II
756	CG6693	4.41598e-91	0.399408	0.809	0.652	8.83197e-88	GC II
757	hrg	5.17236e-91	0.408902	0.844	0.689	1.03447e-87	GC II
758	Gapdh2	8.82029e-91	0.469417	0.973	0.951	1.76406e-87	GC II
759	Aldh	1.15018e-90	0.530426	0.897	0.779	2.30036e-87	GC II
760	Sptr	8.65447e-89	0.331798	0.84	0.651	1.73089e-85	GC II
761	Mos	3.68784e-88	0.277405	0.607	0.376	7.37569e-85	GC II
762	Sec61gamma	5.85555e-88	0.273893	0.995	0.992	1.17111e-84	GC II
763	GLaz	6.28465e-88	0.292669	0.757	0.55	1.25693e-84	GC II
764	CG4210	1.28206e-86	0.398332	0.748	0.575	2.56411e-83	GC II
765	Reep1	2.07218e-86	0.328835	0.716	0.5	4.14436e-83	GC II
766	Dip-B	3.6716e-86	0.338173	0.705	0.488	7.34321e-83	GC II
767	vret	7.6435e-86	0.374681	0.694	0.471	1.5287e-82	GC II
768	BicD	1.51234e-85	0.485744	0.887	0.748	3.02467e-82	GC II
769	gwl	8.4186e-85	0.328403	0.659	0.43	1.68372e-81	GC II
770	Inos	1.09503e-84	0.289224	0.829	0.63	2.19006e-81	GC II
771	CG7504	1.109e-84	0.393809	0.703	0.524	2.21799e-81	GC II
772	CG11077	1.14353e-84	0.338997	0.917	0.806	2.28706e-81	GC II
773	Slbp	7.5296e-84	0.320867	0.933	0.843	1.50592e-80	GC II
774	Chrac-16	2.00758e-83	0.340133	0.917	0.84	4.01515e-80	GC II
775	CG14721	5.68989e-83	0.373261	0.786	0.662	1.13798e-79	GC II
776	CG7372	4.48503e-82	0.321044	0.808	0.642	8.97006e-79	GC II
777	X11Lbeta	1.23975e-80	0.44268	0.57	0.186	2.4795e-77	GC II
778	Bx	1.25163e-80	0.319405	0.729	0.535	2.50325e-77	GC II
779	CG9328	1.50543e-80	0.302217	0.722	0.518	3.01087e-77	GC II
780	Pa1	2.66887e-80	0.448849	0.867	0.812	5.33774e-77	GC II
781	Zw	9.78664e-80	0.25157	0.664	0.477	1.95733e-76	GC II
782	CG4991	1.73353e-79	0.328652	0.566	0.288	3.46706e-76	GC II
783	mrj	2.68107e-79	0.334188	0.815	0.661	5.36214e-76	GC II
784	Chd3	1.04846e-77	0.335127	0.686	0.488	2.09692e-74	GC II
785	CG6329	1.32198e-76	0.384254	0.626	0.39	2.64396e-73	GC II
786	CG8300	2.88342e-76	0.399384	0.741	0.581	5.76684e-73	GC II
787	piwi	3.55625e-76	0.403753	0.841	0.753	7.11249e-73	GC II
788	dock	3.6034e-76	0.297647	0.713	0.495	7.20679e-73	GC II
789	FASN3	1.08128e-75	0.268911	0.595	0.334	2.16256e-72	GC II
790	CG9331	1.15934e-75	0.337732	0.631	0.413	2.31868e-72	GC II
791	borr	2.09122e-75	0.323519	0.807	0.631	4.18243e-72	GC II
792	Pgm	2.68588e-75	0.369661	0.848	0.707	5.37176e-72	GC II
793	GstE1	3.9399e-75	0.306074	0.732	0.535	7.8798e-72	GC II
794	CG2865	5.74855e-74	0.344946	0.81	0.67	1.14971e-70	GC II
795	squ	8.33853e-74	0.25885	0.766	0.582	1.66771e-70	GC II
796	Mob2	1.77678e-73	0.376454	0.804	0.683	3.55357e-70	GC II
797	rad50	1.80961e-73	0.337341	0.77	0.613	3.61922e-70	GC II
798	Argk	2.59217e-73	0.250071	0.97	0.887	5.18433e-70	GC II
799	bip1	4.62881e-73	0.314668	0.678	0.496	9.25762e-70	GC II
800	CG12608	6.81633e-73	0.335477	0.856	0.763	1.36327e-69	GC II
801	Rtnl1	1.07165e-72	0.275959	0.933	0.855	2.1433e-69	GC II
802	Rab27	3.99664e-72	0.297074	0.665	0.461	7.99329e-69	GC II
803	CG8223	8.10864e-72	0.29208	0.937	0.871	1.62173e-68	GC II
804	mud	1.01468e-71	0.344855	0.729	0.58	2.02936e-68	GC II
805	CG13949	1.71756e-71	0.309479	0.554	0.219	3.43511e-68	GC II
806	CG13698	1.83705e-71	0.36023	0.836	0.68	3.67409e-68	GC II
807	vilya	1.34484e-70	0.341139	0.602	0.385	2.68968e-67	GC II
808	GlcAT-P	2.62783e-69	0.271237	0.615	0.44	5.25566e-66	GC II
809	Ptpmeg2	3.83312e-69	0.312678	0.781	0.61	7.66623e-66	GC II
810	Elba2	5.30068e-69	0.261053	0.608	0.427	1.06014e-65	GC II
811	fax	2.28194e-68	0.497047	0.921	0.87	4.56389e-65	GC II
812	egg	4.10347e-68	0.395509	0.768	0.608	8.20694e-65	GC II
813	CG43689	4.29022e-68	0.279674	0.575	0.315	8.58043e-65	GC II
814	CG1665	5.07311e-68	0.295289	0.779	0.606	1.01462e-64	GC II
815	CG4949	3.45613e-67	0.252958	0.674	0.461	6.91226e-64	GC II
816	mad2	3.84939e-67	0.274995	0.84	0.686	7.69878e-64	GC II
817	CG34008	6.79273e-67	0.346362	0.631	0.454	1.35855e-63	GC II
818	Btk29A	6.96385e-67	0.27147	0.81	0.635	1.39277e-63	GC II
819	CG4297	2.06451e-66	0.26347	0.621	0.468	4.12902e-63	GC II
820	CG6927	2.11388e-66	0.287731	0.59	0.339	4.22776e-63	GC II
821	unc-13	3.83381e-65	0.337285	0.814	0.676	7.66762e-62	GC II
822	Eip55E	1.45322e-64	0.330076	0.932	0.848	2.90644e-61	GC II
823	Mcm5	3.82223e-64	0.295169	0.752	0.583	7.64446e-61	GC II
824	pdgy	3.44238e-63	0.270755	0.773	0.596	6.88476e-60	GC II
825	fok	4.09114e-63	0.347916	0.89	0.788	8.18229e-60	GC II
826	RhoGAP18B	5.3848e-62	0.250544	0.73	0.557	1.07696e-58	GC II
827	Psc	6.17217e-60	0.368109	0.853	0.784	1.23443e-56	GC II
828	CG15628	1.19781e-59	0.730982	0.565	0.289	2.39561e-56	GC II
829	UK114	2.05152e-59	0.456631	0.788	0.642	4.10303e-56	GC II
830	Bgb	2.88459e-59	0.269746	0.656	0.508	5.76918e-56	GC II
831	SMC2	6.8463e-59	0.315427	0.799	0.663	1.36926e-55	GC II
832	CG13784	8.6848e-59	0.282161	0.705	0.544	1.73696e-55	GC II
833	CG32264	2.21674e-58	0.347854	0.854	0.74	4.43347e-55	GC II
834	wde	7.7878e-58	0.524544	0.874	0.824	1.55756e-54	GC II
835	CG14441	1.01177e-57	0.27467	0.756	0.586	2.02354e-54	GC II
836	GstO3	1.84146e-57	0.261104	0.634	0.459	3.68292e-54	GC II
837	CG8097	2.65853e-57	0.354294	0.69	0.555	5.31705e-54	GC II
838	crq	5.48578e-57	0.260807	0.67	0.505	1.09716e-53	GC II
839	enc	9.66702e-57	0.382314	0.767	0.656	1.9334e-53	GC II
840	Gbeta13F	1.8964e-56	0.282251	0.985	0.975	3.79279e-53	GC II
841	CG34261	2.49602e-56	0.305669	0.653	0.453	4.99204e-53	GC II
842	CG5039	3.05615e-56	0.281704	0.639	0.479	6.1123e-53	GC II
843	l(2)k09913	4.16745e-56	0.265788	0.8	0.664	8.3349e-53	GC II
844	Ndc80	1.02469e-55	0.256872	0.75	0.607	2.04938e-52	GC II
845	CG7379	9.64825e-55	0.328726	0.672	0.523	1.92965e-51	GC II
846	hwt	6.1144e-54	0.343859	0.565	0.375	1.22288e-50	GC II
847	CG3770	2.16624e-53	0.323695	0.603	0.442	4.33247e-50	GC II
848	cdi	3.24247e-53	0.282644	0.763	0.628	6.48493e-50	GC II
849	Claspin	6.74046e-53	0.252095	0.86	0.739	1.34809e-49	GC II
850	Syx13	2.77015e-51	0.285611	0.674	0.533	5.5403e-48	GC II
851	asf1	4.77163e-51	0.279721	0.911	0.843	9.54327e-48	GC II
852	Hr4	4.89714e-51	0.257843	0.54	0.312	9.79428e-48	GC II
853	CG6084	1.46222e-50	0.250905	0.906	0.839	2.92444e-47	GC II
854	cav	5.42508e-49	0.286703	0.638	0.492	1.08502e-45	GC II
855	RpI12	7.91873e-47	0.272866	0.716	0.603	1.58375e-43	GC II
856	Wdr62	8.3921e-46	0.322071	0.835	0.811	1.67842e-42	GC II
857	tud	1.01722e-45	0.285033	0.818	0.699	2.03445e-42	GC II
858	CG8034	1.51727e-45	0.264442	0.798	0.684	3.03454e-42	GC II
859	aurA	1.72984e-45	0.255403	0.611	0.433	3.45967e-42	GC II
860	Lam	2.15036e-45	0.312171	0.976	0.958	4.30071e-42	GC II
861	mahe	2.0194e-43	0.251418	0.879	0.807	4.0388e-40	GC II
862	CG10254	1.67281e-42	0.349427	0.673	0.55	3.34561e-39	GC II
863	Vha55	1.96236e-42	0.27555	0.949	0.927	3.92472e-39	GC II
864	nesd	4.167e-41	0.262655	0.713	0.618	8.33401e-38	GC II
865	CG12262	1.34188e-39	0.251999	0.756	0.655	2.68376e-36	GC II
866	CG14657	2.43235e-37	0.264998	0.648	0.534	4.86469e-34	GC II
867	REPTOR-BP	4.58561e-36	0.334791	0.748	0.666	9.17122e-33	GC II
868	Cdk4	6.13121e-36	0.307769	0.779	0.696	1.22624e-32	GC II
869	Cad87A	8.19852e-36	0.275052	0.626	0.525	1.6397e-32	GC II
870	l(3)L1231	1.09487e-35	0.268298	0.839	0.779	2.18974e-32	GC II
871	CG9821	2.48255e-33	0.254731	0.989	0.997	4.9651e-30	GC II
872	norpA	1.62596e-32	0.251941	0.662	0.583	3.25191e-29	GC II
873	tacc	1.90518e-32	0.306285	0.827	0.778	3.81036e-29	GC II
874	Tsp39D	3.59311e-32	0.272765	0.705	0.608	7.18622e-29	GC II
875	Mink	2.48189e-30	0.252635	0.704	0.613	4.96378e-27	GC II
876	SMC1	1.97692e-25	0.309537	0.784	0.762	3.95384e-22	GC II
877	Ts	2.68016e-25	0.343089	0.763	0.709	5.36032e-22	GC II
878	CG43062	4.67919e-19	0.311321	0.455	0.221	9.35838e-16	GC II
879	baz	5.87475e-10	0.283365	0.8	0.803	1.17495e-06	GC II
880	CR42862	4.42504e-08	0.307027	0.705	0.749	8.85009e-05	GC II
881	Chd64	0	1.57703	0.994	0.866	0	germarium soma
882	Jupiter	0	1.35663	0.998	0.982	0	germarium soma
883	CG15098	0	1.25455	1	0.942	0	germarium soma
884	mamo	6.30863e-304	1.5312	1	0.966	1.26173e-300	germarium soma
885	SPARC	3.02762e-300	1.47248	1	0.832	6.05525e-297	germarium soma
886	Sirup	2.08814e-298	1.74736	0.994	0.833	4.17627e-295	germarium soma
887	Frl	5.97402e-293	1.00901	0.981	0.753	1.1948e-289	germarium soma
888	CG9821	8.49786e-291	0.857358	1	0.996	1.69957e-287	germarium soma
889	fax	2.8786e-288	1.32588	0.997	0.867	5.7572e-285	germarium soma
890	Cp1	2.48869e-287	1.18353	0.995	0.884	4.97737e-284	germarium soma
891	hdc	3.95918e-270	1.08622	0.997	0.917	7.91835e-267	germarium soma
892	GstS1	4.77357e-266	2.56301	0.956	0.663	9.54714e-263	germarium soma
893	zfh1	1.33393e-253	0.891841	0.838	0.275	2.66787e-250	germarium soma
894	Fer2LCH	1.60464e-250	1.16606	0.987	0.86	3.20927e-247	germarium soma
895	AnxB9	7.35475e-250	0.885736	0.997	0.935	1.47095e-246	germarium soma
896	mbl	2.69557e-248	0.963283	0.953	0.705	5.39115e-245	germarium soma
897	fng	5.92373e-245	0.914817	0.951	0.655	1.18475e-241	germarium soma
898	CG30195	5.85567e-241	1.08435	0.904	0.474	1.17113e-237	germarium soma
899	Atg8a	3.16024e-240	0.745156	0.995	0.943	6.32047e-237	germarium soma
900	cpo	4.5504e-236	0.817349	0.914	0.561	9.1008e-233	germarium soma
901	Cys	7.08607e-232	1.55983	0.852	0.407	1.41721e-228	germarium soma
902	Fas2	2.26743e-230	0.990901	0.995	0.869	4.53486e-227	germarium soma
903	CG5390	5.92499e-226	0.800901	0.904	0.562	1.185e-222	germarium soma
904	CtsB1	3.08079e-224	0.86932	0.997	0.953	6.16158e-221	germarium soma
905	MRE16	1.29609e-223	0.591005	1	1	2.59218e-220	germarium soma
906	CG45263	3.81932e-213	1.06348	0.866	0.496	7.63864e-210	germarium soma
907	chrb	8.90623e-213	0.925611	0.969	0.787	1.78125e-209	germarium soma
908	sick	2.00606e-211	0.796754	0.892	0.533	4.01211e-208	germarium soma
909	Nrt	6.69355e-211	1.02542	0.854	0.438	1.33871e-207	germarium soma
910	Wnt2	9.75868e-209	0.539547	0.818	0.377	1.95174e-205	germarium soma
911	Vago	1.67134e-207	0.625627	0.741	0.183	3.34269e-204	germarium soma
912	CG4250	3.29447e-207	1.39256	0.991	0.95	6.58894e-204	germarium soma
913	Xrp1	1.53117e-205	0.85052	0.978	0.811	3.06235e-202	germarium soma
914	cib	3.67131e-204	0.694807	0.956	0.708	7.34263e-201	germarium soma
915	GILT1	6.74774e-204	0.814675	0.976	0.82	1.34955e-200	germarium soma
916	stv	2.33293e-202	0.978332	0.97	0.8	4.66585e-199	germarium soma
917	Fer1HCH	5.61484e-199	0.970581	0.97	0.767	1.12297e-195	germarium soma
918	Eip93F	7.72597e-195	1.10163	0.92	0.662	1.54519e-191	germarium soma
919	ptc	4.34356e-194	0.952824	0.888	0.559	8.68713e-191	germarium soma
920	Cirl	6.35563e-194	0.751298	0.928	0.7	1.27113e-190	germarium soma
921	RapGAP1	2.22569e-189	0.777281	0.947	0.754	4.45138e-186	germarium soma
922	CG31705	1.82901e-188	0.667599	0.904	0.59	3.65801e-185	germarium soma
923	CG10082	1.52277e-186	0.982609	0.915	0.65	3.04554e-183	germarium soma
924	CG44325	1.69405e-186	1.62319	0.81	0.413	3.3881e-183	germarium soma
925	rudhira	1.87122e-185	0.817842	0.954	0.765	3.74244e-182	germarium soma
926	Eip75B	8.16741e-185	0.660216	0.994	0.929	1.63348e-181	germarium soma
927	Ect4	9.29975e-184	0.649658	0.882	0.521	1.85995e-180	germarium soma
928	Fas3	7.31814e-183	1.55102	0.975	0.808	1.46363e-179	germarium soma
929	nmo	1.60115e-180	0.857472	0.987	0.917	3.2023e-177	germarium soma
930	msi	3.93135e-179	0.756804	0.931	0.641	7.86271e-176	germarium soma
931	jim	8.75949e-177	0.673129	0.973	0.871	1.7519e-173	germarium soma
932	Lk6	1.79454e-176	0.659008	0.997	0.961	3.58908e-173	germarium soma
933	Rac2	2.34317e-176	0.633132	0.934	0.728	4.68635e-173	germarium soma
934	CG42747	5.69605e-176	0.500684	0.811	0.43	1.13921e-172	germarium soma
935	CG43658	4.10545e-175	0.809282	0.909	0.635	8.2109e-172	germarium soma
936	stai	1.31168e-172	0.871319	0.973	0.761	2.62337e-169	germarium soma
937	Akap200	1.14683e-170	0.88864	0.975	0.83	2.29366e-167	germarium soma
938	bab2	8.12667e-169	0.323118	0.748	0.347	1.62533e-165	germarium soma
939	Glycogenin	1.13799e-168	0.703482	0.909	0.627	2.27598e-165	germarium soma
940	shf	3.49492e-168	0.769482	0.763	0.342	6.98985e-165	germarium soma
941	sls	8.15604e-167	0.483813	0.805	0.461	1.63121e-163	germarium soma
942	NK7.1	1.34667e-166	0.640352	0.909	0.657	2.69333e-163	germarium soma
943	CG6770	1.44721e-165	0.876504	1	0.979	2.89441e-162	germarium soma
944	Syp	1.5571e-165	0.531467	0.997	0.961	3.1142e-162	germarium soma
945	CG13917	2.70711e-165	0.648153	0.932	0.754	5.41422e-162	germarium soma
946	CG3662	6.12142e-165	0.732695	0.934	0.75	1.22428e-161	germarium soma
947	CG3168	2.26199e-164	0.961735	0.821	0.489	4.52398e-161	germarium soma
948	CR42862	2.03184e-161	0.776157	0.928	0.739	4.06367e-158	germarium soma
949	miple2	2.89944e-158	0.654048	1	0.952	5.79888e-155	germarium soma
950	CG42389	4.9988e-157	0.615481	0.931	0.763	9.99759e-154	germarium soma
951	CG42566	2.94384e-155	0.705296	0.991	0.872	5.88767e-152	germarium soma
952	wb	1.59432e-153	1.01557	0.819	0.529	3.18864e-150	germarium soma
953	CG12163	2.16387e-153	0.584595	0.925	0.721	4.32774e-150	germarium soma
954	CG17224	6.54231e-153	0.64522	0.876	0.633	1.30846e-149	germarium soma
955	CG31676	5.02588e-152	0.894135	0.748	0.332	1.00518e-148	germarium soma
956	CG43427	5.96478e-152	0.598222	0.866	0.567	1.19296e-148	germarium soma
957	Idgf1	4.63235e-151	0.301995	0.673	0.175	9.26471e-148	germarium soma
958	Timp	6.28938e-151	1.88054	0.84	0.606	1.25788e-147	germarium soma
959	Ubi-p63E	9.65971e-150	0.608193	0.973	0.868	1.93194e-146	germarium soma
960	CG9328	6.75784e-149	0.618094	0.825	0.516	1.35157e-145	germarium soma
961	Pdk	4.8841e-147	0.668669	0.863	0.598	9.76819e-144	germarium soma
962	Act5C	7.2511e-147	0.466423	1	1	1.45022e-143	germarium soma
963	FER	6.69865e-146	0.530818	0.851	0.545	1.33973e-142	germarium soma
964	robo2	2.96929e-145	0.631241	0.769	0.408	5.93858e-142	germarium soma
965	CG7194	2.70633e-144	1.35593	0.86	0.598	5.41266e-141	germarium soma
966	babos	3.7403e-144	0.726716	0.973	0.855	7.48059e-141	germarium soma
967	cdi	3.82315e-144	0.648279	0.877	0.624	7.64631e-141	germarium soma
968	CG14207	4.48475e-144	0.666884	0.846	0.555	8.9695e-141	germarium soma
969	CG4404	1.47245e-142	0.575694	0.939	0.772	2.9449e-139	germarium soma
970	Glut4EF	3.82878e-142	0.647631	0.892	0.635	7.65757e-139	germarium soma
971	REPTOR	1.08474e-141	0.749091	0.962	0.806	2.16949e-138	germarium soma
972	heph	4.89882e-141	0.64098	0.983	0.875	9.79765e-138	germarium soma
973	SP1173	1.36704e-139	0.544163	0.726	0.334	2.73408e-136	germarium soma
974	CG32280	2.40953e-138	0.528873	0.8	0.522	4.81907e-135	germarium soma
975	Diap1	9.93891e-138	0.58301	0.926	0.759	1.98778e-134	germarium soma
976	mlt	1.27399e-135	0.54911	0.767	0.451	2.54799e-132	germarium soma
977	CG13631	1.32103e-135	0.616055	0.755	0.364	2.64206e-132	germarium soma
978	l(3)L1231	3.19823e-135	0.565452	0.932	0.775	6.39647e-132	germarium soma
979	cathD	1.32918e-134	0.509425	0.972	0.889	2.65836e-131	germarium soma
980	E(spl)m2-BFM	5.53852e-134	1.10237	0.868	0.629	1.1077e-130	germarium soma
981	rgr	5.87792e-134	0.618796	0.851	0.576	1.17558e-130	germarium soma
982	Oda	3.21944e-133	0.461611	0.997	0.987	6.43887e-130	germarium soma
983	kuz	1.44588e-132	0.52231	0.951	0.768	2.89177e-129	germarium soma
984	Flo1	3.16024e-132	0.511519	0.884	0.692	6.32048e-129	germarium soma
985	metro	4.73913e-132	0.56554	0.948	0.788	9.47825e-129	germarium soma
986	CR31044	7.72851e-130	0.512681	0.95	0.814	1.5457e-126	germarium soma
987	CG3638	9.61073e-130	0.59449	0.895	0.657	1.92215e-126	germarium soma
988	Gbeta13F	4.67668e-128	0.419546	0.995	0.975	9.35336e-125	germarium soma
989	CG5004	5.62357e-128	0.494405	0.881	0.644	1.12471e-124	germarium soma
990	Slc45-1	1.70514e-127	0.489297	0.67	0.222	3.41028e-124	germarium soma
991	Kank	9.14593e-127	0.494337	0.964	0.804	1.82919e-123	germarium soma
992	CG10527	9.38896e-127	1.04917	0.882	0.681	1.87779e-123	germarium soma
993	CG5758	2.49563e-125	0.417775	0.857	0.583	4.99125e-122	germarium soma
994	E(spl)m3-HLH	4.30959e-125	0.882661	0.962	0.862	8.61918e-122	germarium soma
995	hdly	4.71634e-125	0.480646	0.892	0.678	9.43268e-122	germarium soma
996	CG8539	2.73645e-124	0.507655	0.838	0.588	5.4729e-121	germarium soma
997	CG2691	1.94348e-123	0.570465	0.873	0.666	3.88695e-120	germarium soma
998	tna	3.22675e-123	0.607287	0.879	0.634	6.45351e-120	germarium soma
999	CG8034	4.22661e-123	0.618608	0.896	0.682	8.45322e-120	germarium soma
1000	arm	7.73624e-123	0.490869	0.962	0.831	1.54725e-119	germarium soma
1001	CG34445	9.04753e-123	0.529407	0.744	0.395	1.80951e-119	germarium soma
1002	CG42342	7.6973e-120	0.570549	0.761	0.441	1.53946e-116	germarium soma
1003	CG32486	2.00455e-118	0.687105	0.873	0.686	4.00911e-115	germarium soma
1004	CG9003	7.59222e-118	0.446606	0.825	0.579	1.51844e-114	germarium soma
1005	REPTOR-BP	2.79191e-117	0.527332	0.874	0.661	5.58381e-114	germarium soma
1006	mirr	3.97931e-117	0.823875	0.901	0.65	7.95863e-114	germarium soma
1007	Nrg	7.19615e-116	0.549705	0.899	0.711	1.43923e-112	germarium soma
1008	CG43143	1.87262e-115	0.675544	0.868	0.713	3.74523e-112	germarium soma
1009	Pka-R2	2.75149e-115	0.671345	0.945	0.772	5.50299e-112	germarium soma
1010	fz	1.17066e-114	0.445941	0.722	0.377	2.34131e-111	germarium soma
1011	CG34347	2.2292e-114	0.423359	0.832	0.599	4.4584e-111	germarium soma
1012	CG12643	4.07842e-114	0.346364	0.687	0.362	8.15684e-111	germarium soma
1013	fz2	6.44839e-112	0.600775	0.869	0.651	1.28968e-108	germarium soma
1014	so	8.74256e-112	0.30125	0.67	0.267	1.74851e-108	germarium soma
1015	upd1	1.70962e-111	0.453946	0.623	0.204	3.41923e-108	germarium soma
1016	CG1890	1.46228e-110	0.440431	0.925	0.781	2.92455e-107	germarium soma
1017	l(2)k09913	1.42947e-109	0.458018	0.884	0.662	2.85893e-106	germarium soma
1018	Aldh	2.16461e-108	0.519745	0.934	0.779	4.32922e-105	germarium soma
1019	sbb	1.50413e-107	0.471166	0.973	0.884	3.00826e-104	germarium soma
1020	tsh	2.57515e-107	0.569127	0.792	0.547	5.1503e-104	germarium soma
1021	meso18E	1.61751e-106	0.419704	0.799	0.541	3.23501e-103	germarium soma
1022	CG9932	6.69866e-105	0.616613	0.94	0.712	1.33973e-101	germarium soma
1023	CG2233	2.1896e-104	0.64644	0.665	0.331	4.3792e-101	germarium soma
1024	Wnt4	3.17526e-104	1.1013	0.689	0.35	6.35051e-101	germarium soma
1025	sda	6.18175e-103	1.19893	0.737	0.445	1.23635e-99	germarium soma
1026	CG8547	8.11341e-103	0.454581	0.763	0.494	1.62268e-99	germarium soma
1027	Sodh-2	1.29669e-102	0.538348	0.731	0.474	2.59337e-99	germarium soma
1028	vari	1.6888e-102	0.454221	0.824	0.574	3.37761e-99	germarium soma
1029	Argk	3.62799e-102	1.09701	0.972	0.888	7.25598e-99	germarium soma
1030	ths	7.83591e-102	0.461708	0.697	0.427	1.56718e-98	germarium soma
1031	Pde11	4.33246e-101	0.451633	0.854	0.63	8.66491e-98	germarium soma
1032	betaTub60D	6.92087e-101	0.478844	0.921	0.786	1.38417e-97	germarium soma
1033	scyl	3.36146e-100	0.55485	0.976	0.918	6.72293e-97	germarium soma
1034	CG30154	4.08378e-100	0.474152	0.665	0.326	8.16756e-97	germarium soma
1035	kek1	1.10557e-99	0.555412	0.967	0.873	2.21114e-96	germarium soma
1036	Arc1	1.40102e-99	0.506693	0.711	0.468	2.80205e-96	germarium soma
1037	Ten-a	1.59646e-99	0.460009	0.656	0.267	3.19293e-96	germarium soma
1038	shep	1.906e-99	0.407127	0.948	0.81	3.812e-96	germarium soma
1039	CG10479	3.66766e-99	0.358756	0.78	0.503	7.33531e-96	germarium soma
1040	Mob2	1.18512e-98	0.532252	0.86	0.682	2.37024e-95	germarium soma
1041	CG10407	1.75976e-98	0.410222	0.681	0.374	3.51953e-95	germarium soma
1042	CtBP	2.9485e-98	0.350193	0.995	0.984	5.89701e-95	germarium soma
1043	CG43886	5.15988e-98	0.463168	0.843	0.607	1.03198e-94	germarium soma
1044	pk	3.21276e-97	0.332232	0.687	0.374	6.42553e-94	germarium soma
1045	CG31324	4.32715e-97	0.670312	0.841	0.629	8.65431e-94	germarium soma
1046	SKIP	2.637e-96	0.444035	0.723	0.427	5.274e-93	germarium soma
1047	Spn	2.68849e-96	0.430732	0.899	0.693	5.37699e-93	germarium soma
1048	CG11658	1.68711e-95	0.25691	0.689	0.42	3.37423e-92	germarium soma
1049	sfl	3.74295e-95	0.456693	0.868	0.653	7.48589e-92	germarium soma
1050	CG12398	5.39919e-95	0.262873	0.656	0.303	1.07984e-91	germarium soma
1051	2021-12-01	5.13117e-94	0.667422	0.706	0.427	1.02623e-90	germarium soma
1052	Gclc	6.72192e-94	0.485796	0.797	0.571	1.34438e-90	germarium soma
1053	brat	7.51511e-94	0.468232	0.896	0.721	1.50302e-90	germarium soma
1054	CG1572	9.7381e-94	1.39122	0.81	0.576	1.94762e-90	germarium soma
1055	ttk	5.25918e-93	0.469912	0.939	0.808	1.05184e-89	germarium soma
1056	Tet	6.25354e-93	0.410227	0.774	0.539	1.25071e-89	germarium soma
1057	Nipped-B	8.89401e-93	0.388373	0.992	0.923	1.7788e-89	germarium soma
1058	Sap-r	1.50648e-92	0.461844	0.992	0.948	3.01297e-89	germarium soma
1059	puc	2.45563e-92	0.438439	0.877	0.704	4.91126e-89	germarium soma
1060	mfas	1.06893e-91	0.427914	0.665	0.343	2.13786e-88	germarium soma
1061	Tm1	6.95246e-91	0.441342	0.972	0.913	1.39049e-87	germarium soma
1062	CG15365	9.28143e-91	0.454442	0.731	0.476	1.85629e-87	germarium soma
1063	pgant2	1.11138e-90	0.270899	0.624	0.246	2.22275e-87	germarium soma
1064	fog	1.43989e-90	0.35473	0.739	0.499	2.87978e-87	germarium soma
1065	bbg	2.8076e-90	0.662551	0.888	0.72	5.61519e-87	germarium soma
1066	Sox14	4.47273e-90	0.474404	0.788	0.578	8.94547e-87	germarium soma
1067	jdp	8.90012e-90	0.263548	0.613	0.21	1.78002e-86	germarium soma
1068	Fas1	1.76008e-89	0.490274	0.819	0.648	3.52016e-86	germarium soma
1069	CG12290	2.36057e-89	0.431887	0.792	0.57	4.72115e-86	germarium soma
1070	bif	2.7697e-89	0.404601	0.892	0.719	5.53939e-86	germarium soma
1071	AdamTS-A	7.64924e-89	0.441725	0.825	0.605	1.52985e-85	germarium soma
1072	CG5059	1.94585e-87	0.380058	0.838	0.621	3.8917e-84	germarium soma
1073	CG30069	2.21856e-87	0.495978	0.769	0.521	4.43712e-84	germarium soma
1074	fz3	5.26729e-87	0.258532	0.67	0.388	1.05346e-83	germarium soma
1075	par-1	1.16403e-86	0.49058	0.923	0.838	2.32806e-83	germarium soma
1076	CG42797	1.51933e-86	0.604864	0.92	0.752	3.03865e-83	germarium soma
1077	CG3655	3.18284e-86	0.488537	0.777	0.528	6.36568e-83	germarium soma
1078	Con	6.21274e-86	0.34191	0.621	0.242	1.24255e-82	germarium soma
1079	CG13300	1.82338e-85	0.285522	0.667	0.389	3.64676e-82	germarium soma
1080	E(spl)mbeta-HLH	5.55972e-85	0.716671	0.98	0.886	1.11194e-81	germarium soma
1081	CG8399	7.1241e-85	0.289995	0.736	0.454	1.42482e-81	germarium soma
1082	CG3770	9.97467e-85	0.270876	0.693	0.44	1.99493e-81	germarium soma
1083	CG45050	1.1435e-84	0.440866	0.917	0.815	2.28701e-81	germarium soma
1084	IP3K2	6.63355e-84	0.365789	0.72	0.481	1.32671e-80	germarium soma
1085	CG42673	8.9976e-84	0.321961	0.715	0.434	1.79952e-80	germarium soma
1086	CG1136	9.4914e-84	0.388585	0.774	0.475	1.89828e-80	germarium soma
1087	neur	1.15495e-83	0.372343	0.675	0.413	2.30989e-80	germarium soma
1088	stx	2.8003e-83	0.488164	0.86	0.676	5.60059e-80	germarium soma
1089	Gmap	3.00339e-83	0.41807	0.969	0.897	6.00678e-80	germarium soma
1090	mam	3.74855e-83	0.438411	0.847	0.649	7.49709e-80	germarium soma
1091	CG17265	4.19029e-83	0.46137	0.827	0.634	8.38058e-80	germarium soma
1092	Npc2f	4.55143e-83	0.755163	0.638	0.315	9.10287e-80	germarium soma
1093	fend	2.14727e-82	0.413849	0.903	0.731	4.29454e-79	germarium soma
1094	Gbp1	4.26213e-82	0.326502	0.766	0.514	8.52427e-79	germarium soma
1095	Btk29A	9.31623e-82	0.45566	0.825	0.637	1.86325e-78	germarium soma
1096	dl	1.10221e-81	0.395809	0.665	0.355	2.20441e-78	germarium soma
1097	nuf	6.6891e-81	0.354522	0.802	0.591	1.33782e-77	germarium soma
1098	Ubi-p5E	9.45242e-81	0.369303	0.958	0.815	1.89048e-77	germarium soma
1099	CG8602	8.51072e-80	0.352807	0.892	0.702	1.70214e-76	germarium soma
1100	rgn	5.09958e-79	0.529168	0.97	0.855	1.01992e-75	germarium soma
1101	betaTub56D	6.54188e-79	0.346149	1	0.999	1.30838e-75	germarium soma
1102	ena	6.55231e-79	0.40082	0.937	0.818	1.31046e-75	germarium soma
1103	CG7702	8.92816e-79	0.370432	0.825	0.596	1.78563e-75	germarium soma
1104	CG44085	1.59721e-78	0.374625	0.649	0.376	3.19442e-75	germarium soma
1105	Tollo	3.08302e-78	0.459873	0.774	0.539	6.16605e-75	germarium soma
1106	CenB1A	7.58762e-78	0.287801	0.72	0.464	1.51752e-74	germarium soma
1107	hh	2.9078e-77	0.491872	0.597	0.255	5.81561e-74	germarium soma
1108	E23	4.70761e-77	0.39707	0.781	0.57	9.41522e-74	germarium soma
1109	CG12065	9.70581e-77	0.312355	0.739	0.49	1.94116e-73	germarium soma
1110	mnb	1.7747e-76	0.342316	0.958	0.873	3.54941e-73	germarium soma
1111	aop	2.30351e-76	0.460659	0.989	0.945	4.60702e-73	germarium soma
1112	CG33229	1.03152e-75	0.442814	0.94	0.825	2.06305e-72	germarium soma
1113	prominin-like	2.10883e-75	0.565559	0.766	0.583	4.21766e-72	germarium soma
1114	MESR3	2.42996e-75	0.30468	0.662	0.417	4.85992e-72	germarium soma
1115	Socs36E	1.37874e-74	0.464273	0.934	0.799	2.75749e-71	germarium soma
1116	Snoo	4.06747e-74	0.37177	0.785	0.578	8.13493e-71	germarium soma
1117	CG15309	9.45298e-74	0.459544	0.745	0.539	1.8906e-70	germarium soma
1118	CR43334	9.49388e-74	0.420839	0.77	0.542	1.89878e-70	germarium soma
1119	shg	1.51815e-73	0.416507	0.98	0.901	3.0363e-70	germarium soma
1120	ERp60	2.70107e-73	0.323286	0.984	0.972	5.40214e-70	germarium soma
1121	Sdc	3.37913e-73	0.355095	0.953	0.846	6.75827e-70	germarium soma
1122	Inx3	5.22165e-73	0.428573	0.881	0.739	1.04433e-69	germarium soma
1123	alphaTub84B	7.16364e-73	0.281119	1	1	1.43273e-69	germarium soma
1124	Unr	1.06081e-72	0.296736	0.983	0.945	2.12163e-69	germarium soma
1125	Ect3	1.5173e-72	0.571101	0.877	0.739	3.03461e-69	germarium soma
1126	sano	3.5848e-72	0.356054	0.67	0.425	7.16959e-69	germarium soma
1127	Cyp6a13	4.06656e-72	0.297905	0.711	0.482	8.13313e-69	germarium soma
1128	Orct2	9.24031e-72	0.337287	0.847	0.623	1.84806e-68	germarium soma
1129	CG34401	1.11002e-70	0.387855	0.851	0.686	2.22005e-67	germarium soma
1130	Tsp42Ef	1.61911e-70	0.306969	0.75	0.527	3.23822e-67	germarium soma
1131	Src64B	1.21202e-69	0.255186	0.803	0.582	2.42403e-66	germarium soma
1132	Hexo2	2.48832e-69	0.785892	0.69	0.482	4.97664e-66	germarium soma
1133	Pura	5.15875e-69	0.326322	0.675	0.448	1.03175e-65	germarium soma
1134	dlp	5.51801e-69	0.325624	0.78	0.556	1.1036e-65	germarium soma
1135	Pdcd4	6.13993e-68	0.361552	0.997	0.991	1.22799e-64	germarium soma
1136	CG32264	8.62715e-68	0.309391	0.903	0.739	1.72543e-64	germarium soma
1137	Thor	1.07111e-67	0.769525	0.847	0.713	2.14222e-64	germarium soma
1138	CG31808	1.83603e-67	0.67485	0.783	0.571	3.67205e-64	germarium soma
1139	GstT4	2.18574e-67	0.354996	0.583	0.25	4.37149e-64	germarium soma
1140	Atpalpha	6.41935e-67	0.345337	0.94	0.858	1.28387e-63	germarium soma
1141	RhoL	9.05011e-67	0.432578	0.774	0.557	1.81002e-63	germarium soma
1142	Irc	2.19541e-66	0.281714	0.538	0.09	4.39081e-63	germarium soma
1143	CG5080	2.37687e-66	0.283957	0.593	0.217	4.75375e-63	germarium soma
1144	trol	4.13718e-66	0.459866	0.997	0.983	8.27435e-63	germarium soma
1145	Mal-A5	4.21723e-66	0.334311	0.829	0.621	8.43447e-63	germarium soma
1146	CG6330	5.56691e-66	0.271786	0.648	0.376	1.11338e-62	germarium soma
1147	Rbfox1	1.57223e-65	0.305659	0.885	0.745	3.14447e-62	germarium soma
1148	cno	2.84e-65	0.325496	0.843	0.657	5.67999e-62	germarium soma
1149	cas	7.40677e-64	0.463424	0.605	0.226	1.48135e-60	germarium soma
1150	yip2	7.68526e-64	0.331884	0.796	0.613	1.53705e-60	germarium soma
1151	Fim	1.06021e-63	0.417958	0.825	0.653	2.12042e-60	germarium soma
1152	Imp	7.98172e-63	0.316196	0.994	0.971	1.59634e-59	germarium soma
1153	drpr	1.70977e-62	0.346769	0.865	0.688	3.41953e-59	germarium soma
1154	UbcE2H	3.68097e-62	0.267186	0.789	0.597	7.36194e-59	germarium soma
1155	CG1146	9.15304e-62	0.272996	0.704	0.476	1.83061e-58	germarium soma
1156	sty	1.02665e-61	0.446745	0.873	0.711	2.05331e-58	germarium soma
1157	CG32485	1.34796e-60	0.322364	0.821	0.653	2.69592e-57	germarium soma
1158	CG12576	5.20211e-60	0.360836	0.788	0.624	1.04042e-56	germarium soma
1159	CG4572	1.12757e-59	0.369882	0.89	0.798	2.25514e-56	germarium soma
1160	CG17754	2.6239e-59	0.282206	0.709	0.525	5.24781e-56	germarium soma
1161	MtnA	3.7742e-59	0.929195	0.686	0.5	7.54841e-56	germarium soma
1162	CDase	3.85344e-59	0.280966	0.632	0.382	7.70688e-56	germarium soma
1163	CG7530	4.34981e-59	0.467857	0.829	0.68	8.69962e-56	germarium soma
1164	Atf3	8.61744e-59	0.405553	0.682	0.475	1.72349e-55	germarium soma
1165	CG9743	1.02528e-58	0.345635	0.645	0.326	2.05056e-55	germarium soma
1166	skd	1.45562e-58	0.281544	0.881	0.751	2.91125e-55	germarium soma
1167	Sema1a	3.07683e-58	0.283244	0.723	0.525	6.15365e-55	germarium soma
1168	26-29-p	4.76844e-58	0.299756	0.928	0.828	9.53688e-55	germarium soma
1169	Psc	1.23956e-57	0.347687	0.896	0.783	2.47913e-54	germarium soma
1170	dnc	1.77872e-57	0.408228	0.692	0.453	3.55744e-54	germarium soma
1171	Syx1A	3.18957e-57	0.305869	0.901	0.801	6.37914e-54	germarium soma
1172	spin	3.25214e-57	0.349088	0.846	0.682	6.50428e-54	germarium soma
1173	kay	2.03168e-55	0.370381	0.778	0.64	4.06335e-52	germarium soma
1174	CG31431	2.03862e-55	0.327824	0.613	0.353	4.07724e-52	germarium soma
1175	CG32767	2.63252e-55	0.304746	0.858	0.712	5.26503e-52	germarium soma
1176	CG6701	1.58061e-54	0.32655	0.786	0.621	3.16122e-51	germarium soma
1177	CG31637	1.71969e-54	0.321856	0.686	0.495	3.43939e-51	germarium soma
1178	caps	6.7567e-54	0.294978	0.822	0.642	1.35134e-50	germarium soma
1179	stl	2.78786e-53	1.15431	0.896	0.802	5.57571e-50	germarium soma
1180	GstE1	3.0377e-53	0.308506	0.726	0.537	6.07539e-50	germarium soma
1181	armi	4.85415e-53	0.35029	0.942	0.879	9.7083e-50	germarium soma
1182	CG43736	4.59715e-52	0.296648	0.907	0.796	9.1943e-49	germarium soma
1183	bib	5.21238e-52	0.261999	0.596	0.339	1.04248e-48	germarium soma
1184	mav	6.02659e-52	0.252067	0.671	0.48	1.20532e-48	germarium soma
1185	Trf2	1.55961e-51	0.315986	0.945	0.892	3.11922e-48	germarium soma
1186	Hsromega	2.20005e-51	0.502199	1	0.982	4.40009e-48	germarium soma
1187	jigr1	3.13867e-51	0.305943	0.824	0.653	6.27734e-48	germarium soma
1188	otk	3.4619e-51	0.390798	0.651	0.475	6.92379e-48	germarium soma
1189	Cadps	1.93629e-50	0.300647	0.631	0.401	3.87257e-47	germarium soma
1190	CG2865	2.93064e-50	0.347798	0.789	0.673	5.86128e-47	germarium soma
1191	CG8312	5.72277e-50	0.253664	0.725	0.524	1.14455e-46	germarium soma
1192	DOR	7.61568e-50	0.564278	0.662	0.484	1.52314e-46	germarium soma
1193	cher	1.41991e-49	0.316141	0.819	0.658	2.83981e-46	germarium soma
1194	Mnt	1.50531e-49	0.27268	0.783	0.633	3.01063e-46	germarium soma
1195	wls	1.66407e-49	0.257215	0.662	0.457	3.32813e-46	germarium soma
1196	CG8839	4.61435e-49	0.334706	0.723	0.573	9.22871e-46	germarium soma
1197	KrT95D	1.47102e-48	0.280997	0.78	0.626	2.94205e-45	germarium soma
1198	CG44245	2.16051e-48	0.266224	0.621	0.42	4.32103e-45	germarium soma
1199	CG9005	2.80025e-47	0.33247	0.756	0.605	5.6005e-44	germarium soma
1200	CG42240	3.03278e-47	0.461945	0.857	0.756	6.06557e-44	germarium soma
1201	mub	1.7266e-46	0.267811	0.827	0.688	3.4532e-43	germarium soma
1202	ci	2.05296e-46	0.255639	0.774	0.609	4.10592e-43	germarium soma
1203	Msp300	3.76244e-46	0.35626	0.991	0.946	7.52487e-43	germarium soma
1204	CG14072	4.54289e-46	0.754148	0.552	0.271	9.08578e-43	germarium soma
1205	p120ctn	6.45694e-46	0.266699	0.854	0.751	1.29139e-42	germarium soma
1206	LanB1	1.18221e-45	0.291484	0.992	0.959	2.36442e-42	germarium soma
1207	Paip2	6.56551e-45	0.263673	0.75	0.58	1.3131e-41	germarium soma
1208	Pcd	7.8418e-45	0.271914	0.767	0.625	1.56836e-41	germarium soma
1209	Lrch	1.14471e-44	0.250667	0.693	0.525	2.28941e-41	germarium soma
1210	ref(2)P	1.0062e-43	0.282955	0.808	0.677	2.0124e-40	germarium soma
1211	CG9674	7.90376e-43	0.590754	0.737	0.608	1.58075e-39	germarium soma
1212	bun	1.08475e-42	0.270508	0.978	0.914	2.16951e-39	germarium soma
1213	mgl	1.17276e-42	0.434931	0.789	0.696	2.34552e-39	germarium soma
1214	FASN1	4.43347e-42	0.292928	0.805	0.65	8.86694e-39	germarium soma
1215	CG6231	2.24981e-41	0.361513	0.642	0.473	4.49962e-38	germarium soma
1216	CG17574	3.23018e-41	0.265638	0.769	0.624	6.46036e-38	germarium soma
1217	mew	3.38935e-41	0.390587	0.829	0.704	6.77869e-38	germarium soma
1218	Prosap	3.93666e-41	0.294823	0.98	0.964	7.87332e-38	germarium soma
1219	kcc	1.03193e-40	0.266341	0.708	0.545	2.06386e-37	germarium soma
1220	wun2	8.30483e-40	0.601638	0.637	0.499	1.66097e-36	germarium soma
1221	CG13252	2.30101e-39	0.280095	0.865	0.755	4.60201e-36	germarium soma
1222	mrj	4.91878e-39	0.262309	0.794	0.664	9.83755e-36	germarium soma
1223	alc	5.95075e-39	0.304959	0.748	0.632	1.19015e-35	germarium soma
1224	Ppa	6.21619e-39	0.263441	0.747	0.604	1.24324e-35	germarium soma
1225	CG10326	2.40854e-38	0.255869	0.807	0.669	4.81708e-35	germarium soma
1226	Idgf6	1.54138e-37	0.37926	0.624	0.479	3.08276e-34	germarium soma
1227	CG5946	7.56808e-37	0.314252	0.884	0.821	1.51362e-33	germarium soma
1228	dome	1.19708e-36	0.356981	0.833	0.733	2.39415e-33	germarium soma
1229	CG6357	3.16602e-36	0.806522	0.708	0.57	6.33203e-33	germarium soma
1230	unc-13	1.53353e-35	0.273165	0.835	0.676	3.06706e-32	germarium soma
1231	Egfr	1.92623e-35	0.269787	0.865	0.738	3.85247e-32	germarium soma
1232	pyd	3.57241e-35	0.252301	0.947	0.885	7.14482e-32	germarium soma
1233	CG9628	7.18953e-35	0.277079	0.517	0.21	1.43791e-31	germarium soma
1234	CG4300	9.9182e-35	0.253482	0.788	0.631	1.98364e-31	germarium soma
1235	CG18343	1.14586e-34	0.260893	0.789	0.678	2.29171e-31	germarium soma
1236	bowl	3.88852e-34	0.257542	0.734	0.595	7.77704e-31	germarium soma
1237	Tre1	5.29615e-34	0.261616	0.742	0.642	1.05923e-30	germarium soma
1238	CG5953	5.46499e-34	0.338265	0.766	0.678	1.093e-30	germarium soma
1239	CG1827	2.17641e-33	0.309733	0.72	0.599	4.35283e-30	germarium soma
1240	tj	4.85863e-33	0.32446	0.882	0.823	9.71727e-30	germarium soma
1241	Rbp6	9.03812e-33	0.263947	0.596	0.412	1.80762e-29	germarium soma
1242	E(spl)m7-HLH	2.06199e-32	0.812301	0.813	0.663	4.12397e-29	germarium soma
1243	sky	2.73699e-32	0.297893	0.752	0.627	5.47398e-29	germarium soma
1244	CG17646	1.53215e-31	0.265264	0.582	0.421	3.0643e-28	germarium soma
1245	CLIP-190	2.05075e-31	0.27289	0.821	0.742	4.10151e-28	germarium soma
1246	FucTB	6.95784e-31	0.253953	0.711	0.57	1.39157e-27	germarium soma
1247	InR	9.96764e-31	0.289503	0.808	0.71	1.99353e-27	germarium soma
1248	sli	1.00659e-30	0.262758	0.615	0.459	2.01319e-27	germarium soma
1249	CG17124	4.4097e-30	0.263288	0.775	0.644	8.81941e-27	germarium soma
1250	GstD1	4.85916e-30	0.35676	0.997	0.993	9.71832e-27	germarium soma
1251	Gp150	2.39507e-29	0.254667	0.995	0.966	4.79015e-26	germarium soma
1252	CG31955	2.73473e-29	0.251794	0.621	0.473	5.46945e-26	germarium soma
1253	cv-c	7.03472e-29	0.306266	0.761	0.68	1.40694e-25	germarium soma
1254	dally	1.08015e-28	0.44789	0.838	0.805	2.16029e-25	germarium soma
1255	ab	3.57064e-28	0.341708	0.687	0.564	7.14129e-25	germarium soma
1256	CG34325	2.63273e-27	0.266328	0.656	0.529	5.26545e-24	germarium soma
1257	Pde9	1.41227e-26	0.29534	0.58	0.403	2.82453e-23	germarium soma
1258	CG15784	4.06068e-26	0.281863	0.649	0.487	8.12136e-23	germarium soma
1259	Gadd45	4.39308e-26	0.594015	0.649	0.537	8.78616e-23	germarium soma
1260	Mes2	7.88593e-26	0.262464	0.676	0.584	1.57719e-22	germarium soma
1261	how	7.7327e-24	0.32007	0.706	0.607	1.54654e-20	germarium soma
1262	LamC	1.47259e-21	0.305038	0.668	0.511	2.94518e-18	germarium soma
1263	tkv	1.6541e-21	0.303509	0.629	0.512	3.3082e-18	germarium soma
1264	CG34207	7.85947e-19	0.250253	0.601	0.479	1.57189e-15	germarium soma
1265	CG10311	1.68845e-17	0.469907	0.5	0.248	3.3769e-14	germarium soma
1266	CG43341	4.55631e-17	0.300394	0.497	0.252	9.11262e-14	germarium soma
1267	CR45018	2.23243e-15	0.369651	0.552	0.465	4.46486e-12	germarium soma
1268	CG13377	3.49555e-15	0.472046	0.564	0.489	6.9911e-12	germarium soma
1269	Wnt6	6.30417e-15	0.470973	0.465	0.222	1.26083e-11	germarium soma
1270	CG1648	6.02704e-14	0.86184	0.502	0.336	1.20541e-10	germarium soma
1271	CG9360	4.85264e-12	0.265239	0.491	0.364	9.70528e-09	germarium soma
1272	CG13868	6.09827e-12	0.275295	0.591	0.487	1.21965e-08	germarium soma
1273	Cyp18a1	1.76632e-10	0.269302	0.709	0.598	3.53265e-07	germarium soma
1274	fas	2.55567e-08	0.334082	0.464	0.284	5.11135e-05	germarium soma
1275	NLaz	8.65468e-05	0.33435	0.513	0.447	0.173094	germarium soma
1276	CG14984	9.90433e-05	0.341023	0.421	0.164	0.198087	germarium soma
1277	CG42458	0.00249792	0.25864	0.396	0.155	1	germarium soma
1278	SPARC	0	1.31109	0.992	0.741	0	FC I
1279	Fas2	0	0.980776	0.993	0.797	0	FC I
1280	CG42566	0	0.857513	0.991	0.803	0	FC I
1281	ct	0	0.829862	0.931	0.561	0	FC I
1282	Pen	0	0.798854	0.967	0.736	0	FC I
1283	HmgD	0	0.702259	1	0.993	0	FC I
1284	eya	0	0.684062	0.944	0.667	0	FC I
1285	CG4250	0	0.661604	0.998	0.922	0	FC I
1286	CG42797	0	0.647761	0.921	0.655	0	FC I
1287	hdc	0	0.636261	0.986	0.877	0	FC I
1288	stai	0	0.62641	0.951	0.653	0	FC I
1289	Df31	0	0.62384	1	1	0	FC I
1290	babos	0	0.623493	0.964	0.792	0	FC I
1291	miple2	0	0.618289	0.994	0.929	0	FC I
1292	Bacc	0	0.611243	1	1	0	FC I
1293	Cyp6d2	0	0.610929	0.837	0.515	0	FC I
1294	Uvrag	0	0.569102	0.907	0.655	0	FC I
1295	armi	0	0.561998	0.967	0.826	0	FC I
1296	Ugt58Fa	0	0.557818	0.915	0.593	0	FC I
1297	Pka-R2	0	0.539793	0.912	0.694	0	FC I
1298	LanA	0	0.5362	0.984	0.911	0	FC I
1299	aop	0	0.514181	0.986	0.921	0	FC I
1300	CG9932	0	0.50549	0.912	0.598	0	FC I
1301	stg	0	0.498534	0.97	0.745	0	FC I
1302	betaTub56D	0	0.492607	1	0.999	0	FC I
1303	aurB	0	0.487994	0.904	0.637	0	FC I
1304	jim	0	0.48044	0.945	0.831	0	FC I
1305	LanB1	0	0.475029	0.991	0.941	0	FC I
1306	Act42A	0	0.472684	0.999	0.99	0	FC I
1307	His2Av	0	0.462671	1	0.999	0	FC I
1308	CG32485	0	0.460798	0.771	0.588	0	FC I
1309	E(spl)m2-BFM	0	0.455257	0.799	0.535	0	FC I
1310	Sod3	0	0.447541	0.945	0.843	0	FC I
1311	D1	0	0.444223	1	0.991	0	FC I
1312	Eip75B	0	0.434756	0.984	0.899	0	FC I
1313	CG14275	0	0.431897	0.812	0.619	0	FC I
1314	fz2	0	0.422284	0.809	0.563	0	FC I
1315	E(spl)m3-HLH	0	0.41929	0.943	0.817	0	FC I
1316	fru	0	0.414476	0.869	0.646	0	FC I
1317	CG13252	0	0.410826	0.888	0.677	0	FC I
1318	CG1910	0	0.409795	0.992	0.969	0	FC I
1319	LanB2	0	0.40825	0.945	0.845	0	FC I
1320	tutl	0	0.404659	0.771	0.451	0	FC I
1321	CG9967	0	0.404506	0.768	0.504	0	FC I
1322	btsz	0	0.403378	0.903	0.759	0	FC I
1323	fabp	0	0.394647	1	1	0	FC I
1324	MRE16	0	0.393669	1	1	0	FC I
1325	nord	0	0.393185	0.796	0.551	0	FC I
1326	CG10165	0	0.386809	0.911	0.769	0	FC I
1327	ncd	0	0.37856	0.817	0.572	0	FC I
1328	CG1943	0	0.375493	0.97	0.789	0	FC I
1329	Syp	0	0.373488	0.994	0.941	0	FC I
1330	kuk	0	0.372438	0.919	0.708	0	FC I
1331	Ote	0	0.37008	0.85	0.655	0	FC I
1332	mamo	0	0.368815	0.997	0.948	0	FC I
1333	Incenp	0	0.359609	0.857	0.638	0	FC I
1334	CadN	0	0.355948	0.826	0.587	0	FC I
1335	Top2	0	0.355726	0.957	0.868	0	FC I
1336	Lam	0	0.351396	0.987	0.941	0	FC I
1337	AnxB9	0	0.348494	0.976	0.913	0	FC I
1338	Sugb	0	0.347512	0.922	0.819	0	FC I
1339	CG7702	0	0.346359	0.742	0.518	0	FC I
1340	CG10527	0	0.341716	0.842	0.59	0	FC I
1341	Imp	0	0.340833	0.984	0.964	0	FC I
1342	shg	0	0.340784	0.953	0.873	0	FC I
1343	Six4	0	0.338663	0.995	0.939	0	FC I
1344	corto	0	0.338411	0.941	0.88	0	FC I
1345	msi	0	0.314718	0.791	0.563	0	FC I
1346	sle	0	0.312621	0.849	0.725	0	FC I
1347	CG43759	0	0.308903	0.81	0.629	0	FC I
1348	CG31710	0	0.305475	0.779	0.582	0	FC I
1349	glu	0	0.303608	0.846	0.702	0	FC I
1350	Cks30A	0	0.301768	0.721	0.481	0	FC I
1351	CG7675	0	0.298908	0.786	0.605	0	FC I
1352	CG42232	0	0.293107	0.821	0.668	0	FC I
1353	tum	0	0.286156	0.731	0.472	0	FC I
1354	fzy	0	0.28547	0.771	0.577	0	FC I
1355	scra	0	0.28492	0.774	0.604	0	FC I
1356	Rrp1	0	0.278274	0.819	0.65	0	FC I
1357	sip2	0	0.275856	0.733	0.523	0	FC I
1358	piwi	0	0.275413	0.849	0.699	0	FC I
1359	bdl	0	0.273772	0.691	0.417	0	FC I
1360	polo	0	0.271445	0.748	0.479	0	FC I
1361	CG9132	0	0.265303	0.78	0.606	0	FC I
1362	CG15546	0	0.264677	0.658	0.353	0	FC I
1363	rgn	9.69955e-307	0.263713	0.925	0.818	1.93991e-303	FC I
1364	tj	9.93955e-301	0.277416	0.893	0.781	1.98791e-297	FC I
1365	CG34417	1.33193e-294	0.277625	0.814	0.654	2.66386e-291	FC I
1366	CG10512	3.1403e-279	0.316975	0.661	0.459	6.2806e-276	FC I
1367	emc	2.24323e-278	0.395588	0.914	0.834	4.48645e-275	FC I
1368	CG42240	1.17008e-262	0.258898	0.84	0.709	2.34016e-259	FC I
1369	Asph	5.31865e-194	0.369082	0.839	0.746	1.06373e-190	FC I
1370	Obp99a	0	0.769816	0.98	0.882	0	FC II
1371	stg	0	0.699178	0.964	0.808	0	FC II
1372	br	0	0.565923	0.918	0.769	0	FC II
1373	Asph	0	0.521163	0.932	0.753	0	FC II
1374	CG32425	9.76177e-275	0.386609	0.975	0.943	1.95235e-271	FC II
1375	CG8036	5.51209e-249	0.353065	0.999	0.983	1.10242e-245	FC II
1376	qtc	5.94454e-235	0.407164	0.917	0.821	1.18891e-231	FC II
1377	alt	1.32379e-220	0.335594	0.975	0.947	2.64758e-217	FC II
1378	peb	3.55656e-206	0.436853	0.905	0.769	7.11313e-203	FC II
1379	CG8112	3.29859e-178	0.287448	0.741	0.593	6.59718e-175	FC II
1380	Npc2a	1.63115e-177	0.32245	0.978	0.909	3.26231e-174	FC II
1381	ed	1.3224e-166	0.287665	0.959	0.927	2.64481e-163	FC II
1382	Sod3	9.65767e-155	0.287937	0.939	0.872	1.93153e-151	FC II
1383	GstE14	2.3348e-143	0.290681	0.822	0.704	4.6696e-140	FC II
1384	CG18208	1.60887e-141	0.27619	0.701	0.549	3.21775e-138	FC II
1385	PH4alphaEFB	4.45313e-137	0.271388	0.959	0.894	8.90626e-134	FC II
1386	LManII	3.91098e-136	0.33887	0.828	0.776	7.82197e-133	FC II
1387	fend	3.98801e-134	0.273778	0.825	0.721	7.97602e-131	FC II
1388	Unc-115a	3.59145e-87	0.250285	0.67	0.587	7.1829e-84	FC II
1389	glec	1.14299e-86	0.253175	0.813	0.737	2.28597e-83	FC II
1390	CG15529	3.65026e-79	0.290562	0.908	0.864	7.30052e-76	FC II
1391	Yp1	0	1.53386	0.804	0.528	0	FC III
1392	ImpL2	0	0.892664	0.708	0.431	0	FC III
1393	sosie	0	0.810951	0.789	0.449	0	FC III
1394	CG9953	0	0.745732	0.999	0.957	0	FC III
1395	Vha13	0	0.708604	1	0.998	0	FC III
1396	Hsp23	0	0.663652	0.957	0.849	0	FC III
1397	Col4a1	0	0.63134	0.994	0.95	0	FC III
1398	CG11200	0	0.625168	0.949	0.702	0	FC III
1399	CG1620	0	0.624161	0.988	0.93	0	FC III
1400	CG43156	0	0.566868	0.952	0.739	0	FC III
1401	Hsp67Bc	0	0.563775	0.946	0.79	0	FC III
1402	vkg	0	0.507556	0.999	0.92	0	FC III
1403	Oat	0	0.507153	0.998	0.939	0	FC III
1404	CG5326	0	0.503194	0.716	0.364	0	FC III
1405	CG8303	0	0.500982	0.805	0.419	0	FC III
1406	sesB	0	0.492116	1	1	0	FC III
1407	ndl	0	0.482772	0.805	0.541	0	FC III
1408	CG8036	0	0.480816	0.999	0.979	0	FC III
1409	kar	0	0.466847	0.933	0.71	0	FC III
1410	Npc2a	0	0.45976	0.996	0.883	0	FC III
1411	Hsromega	0	0.452899	0.997	0.976	0	FC III
1412	Vha36-1	0	0.446188	0.998	0.975	0	FC III
1413	Vha68-2	0	0.445351	0.982	0.898	0	FC III
1414	Tpi	0	0.442239	0.997	0.97	0	FC III
1415	CG1628	0	0.419948	0.981	0.889	0	FC III
1416	Pglym78	0	0.415724	0.992	0.93	0	FC III
1417	sm	0	0.405359	0.855	0.619	0	FC III
1418	peb	0	0.403086	0.956	0.71	0	FC III
1419	CG5112	0	0.388609	0.888	0.694	0	FC III
1420	Iris	0	0.383331	0.663	0.429	0	FC III
1421	Inos	0	0.376408	0.766	0.579	0	FC III
1422	Vha16-1	0	0.372101	1	0.998	0	FC III
1423	Vha14-1	0	0.369359	0.995	0.968	0	FC III
1424	Cyt-c-p	0	0.36106	1	0.999	0	FC III
1425	CG3011	0	0.3595	0.997	0.949	0	FC III
1426	CG13992	0	0.358854	0.717	0.454	0	FC III
1427	CG42336	0	0.356134	1	0.985	0	FC III
1428	CG4666	0	0.339359	0.685	0.35	0	FC III
1429	Vha55	0	0.337329	0.975	0.905	0	FC III
1430	CG9747	0	0.332096	0.826	0.554	0	FC III
1431	Best2	0	0.323707	0.746	0.383	0	FC III
1432	CG11444	0	0.318492	0.998	0.965	0	FC III
1433	Vha26	0	0.3177	0.997	0.979	0	FC III
1434	CG7781	0	0.314787	0.803	0.618	0	FC III
1435	GlyP	0	0.313882	0.855	0.624	0	FC III
1436	mirr	0	0.313605	0.802	0.59	0	FC III
1437	AsnS	0	0.309764	0.776	0.522	0	FC III
1438	spri	0	0.300624	0.872	0.691	0	FC III
1439	Men	0	0.293976	0.771	0.581	0	FC III
1440	VhaM9.7-b	0	0.293411	0.998	0.986	0	FC III
1441	RNASEK	0	0.286976	1	0.998	0	FC III
1442	VhaM8.9	0	0.286775	0.963	0.87	0	FC III
1443	CG17734	0	0.285415	0.991	0.938	0	FC III
1444	Mpcp	0	0.284836	0.999	0.983	0	FC III
1445	wdp	0	0.283299	0.697	0.433	0	FC III
1446	sad	0	0.281299	0.676	0.405	0	FC III
1447	Pgm	0	0.277228	0.863	0.641	0	FC III
1448	sro	0	0.274604	0.925	0.772	0	FC III
1449	CG5885	0	0.274071	0.997	0.977	0	FC III
1450	veil	0	0.26874	0.679	0.33	0	FC III
1451	Sap-r	0	0.261503	0.985	0.932	0	FC III
1452	CG7737	0	0.260532	0.867	0.683	0	FC III
1453	eEF2	0	0.253249	1	1	0	FC III
1454	CG34325	0	0.250547	0.712	0.447	0	FC III
1455	Hsp68	2.45384e-307	0.311767	0.87	0.703	4.90767e-304	FC III
1456	Tm1	1.07045e-306	0.273118	0.972	0.888	2.14091e-303	FC III
1457	Vha44	2.59313e-304	0.254895	0.989	0.937	5.18626e-301	FC III
1458	DnaJ-1	1.75467e-303	0.304233	0.911	0.762	3.50934e-300	FC III
1459	Yp2	3.3367e-303	1.92356	0.722	0.549	6.6734e-300	FC III
1460	CG12107	2.56077e-297	0.253334	0.947	0.829	5.12154e-294	FC III
1461	dnk	1.26223e-291	0.360243	0.877	0.724	2.52446e-288	FC III
1462	Gdh	4.86925e-278	0.260664	0.963	0.855	9.7385e-275	FC III
1463	Rpi	7.75152e-270	0.255636	0.999	0.989	1.5503e-266	FC III
1464	SsRbeta	1.95569e-268	0.258475	0.939	0.814	3.91139e-265	FC III
1465	PH4alphaEFB	4.0799e-263	0.287761	0.968	0.873	8.15979e-260	FC III
1466	CG43693	1.68043e-255	0.266903	0.987	0.903	3.36086e-252	FC III
1467	CG17816	9.34709e-251	0.254454	0.829	0.676	1.86942e-247	FC III
1468	Sdc	6.24277e-155	0.301709	0.906	0.824	1.24855e-151	FC III
1469	Sam-S	1.22185e-152	0.250915	0.998	0.964	2.44371e-149	FC III
1470	Rtnl1	7.4767e-146	0.388092	0.908	0.835	1.49534e-142	FC III
1471	Vm26Ab	4.76157e-139	1.18226	0.631	0.503	9.52313e-136	FC III
1472	Yp3	3.55452e-84	0.831681	0.707	0.623	7.10904e-81	FC III
1473	Vm34Ca	6.42609e-07	1.17318	0.592	0.591	0.00128522	FC III
1474	CG6628	1.48063e-31	0.632123	1	0.311	2.96125e-28	GSC/CB/2-cc
1475	CG12493	2.33577e-22	1.01725	0.971	0.397	4.67155e-19	GSC/CB/2-cc
1476	CG15398	6.47149e-22	0.500533	0.914	0.283	1.2943e-18	GSC/CB/2-cc
1477	CG13540	6.55859e-22	0.903776	1	0.508	1.31172e-18	GSC/CB/2-cc
1478	CG5111	5.68378e-21	0.437084	0.971	0.39	1.13676e-17	GSC/CB/2-cc
1479	CG14346	6.49046e-21	0.572957	0.971	0.39	1.29809e-17	GSC/CB/2-cc
1480	CR43857	6.97725e-21	0.796967	1	0.495	1.39545e-17	GSC/CB/2-cc
1481	CR43651	4.19063e-20	0.945928	1	0.71	8.38125e-17	GSC/CB/2-cc
1482	Cyt-c1L	1.29796e-19	0.729004	1	0.539	2.59592e-16	GSC/CB/2-cc
1483	CG2887	1.84901e-19	0.369766	0.943	0.368	3.69802e-16	GSC/CB/2-cc
1484	mahe	5.81806e-19	0.94631	1	0.903	1.16361e-15	GSC/CB/2-cc
1485	chinmo	6.26665e-19	0.960441	1	0.717	1.25333e-15	GSC/CB/2-cc
1486	CG12782	1.14915e-17	0.407213	0.971	0.422	2.29831e-14	GSC/CB/2-cc
1487	Pdcd4	1.73049e-17	0.925121	1	0.997	3.46098e-14	GSC/CB/2-cc
1488	Fas2	3.69764e-17	0.787724	1	0.767	7.39528e-14	GSC/CB/2-cc
1489	CG14072	3.74766e-17	0.379026	0.943	0.63	7.49532e-14	GSC/CB/2-cc
1490	Xrp1	8.1008e-17	0.341753	1	0.414	1.62016e-13	GSC/CB/2-cc
1491	Hsp23	1.42559e-16	0.928715	1	0.916	2.85118e-13	GSC/CB/2-cc
1492	fuss	2.36642e-16	0.533421	0.971	0.553	4.73285e-13	GSC/CB/2-cc
1493	CG14932	8.01182e-16	0.865242	1	0.745	1.60236e-12	GSC/CB/2-cc
1494	ord	9.28573e-16	0.372914	0.971	0.603	1.85715e-12	GSC/CB/2-cc
1495	CG34445	9.4419e-16	0.258298	0.943	0.45	1.88838e-12	GSC/CB/2-cc
1496	CG10405	3.14005e-15	0.329494	0.943	0.423	6.28011e-12	GSC/CB/2-cc
1497	Dg	4.6569e-15	0.326934	1	0.552	9.3138e-12	GSC/CB/2-cc
1498	CG13029	6.33658e-15	0.520335	1	0.625	1.26732e-11	GSC/CB/2-cc
1499	heph	7.63807e-15	0.696347	1	0.843	1.52761e-11	GSC/CB/2-cc
1500	CG32483	1.77066e-14	0.33015	0.943	0.399	3.54132e-11	GSC/CB/2-cc
1501	CR31044	3.5856e-14	0.697493	1	0.83	7.1712e-11	GSC/CB/2-cc
1502	Acf	3.60573e-14	0.561952	1	0.823	7.21145e-11	GSC/CB/2-cc
1503	CG9801	4.1451e-14	0.264059	0.971	0.606	8.29019e-11	GSC/CB/2-cc
1504	Atg8a	5.14543e-14	0.556351	1	0.952	1.02909e-10	GSC/CB/2-cc
1505	CG12851	6.39859e-14	0.313073	0.971	0.556	1.27972e-10	GSC/CB/2-cc
1506	sle	6.60634e-14	0.616019	0.971	0.829	1.32127e-10	GSC/CB/2-cc
1507	CG9705	7.66015e-14	0.555873	1	0.901	1.53203e-10	GSC/CB/2-cc
1508	TfIIA-S	7.77157e-14	0.507171	1	0.989	1.55431e-10	GSC/CB/2-cc
1509	Rcd-1	8.81192e-14	0.575759	1	0.93	1.76238e-10	GSC/CB/2-cc
1510	blanks	9.82274e-14	0.511454	0.971	0.501	1.96455e-10	GSC/CB/2-cc
1511	RpS10a	2.03695e-12	0.59091	1	0.804	4.0739e-09	GSC/CB/2-cc
1512	CG34355	2.44374e-12	0.295563	1	0.655	4.88747e-09	GSC/CB/2-cc
1513	Act42A	2.65238e-12	0.500086	1	0.969	5.30476e-09	GSC/CB/2-cc
1514	CG7372	2.77372e-12	0.554627	1	0.849	5.54744e-09	GSC/CB/2-cc
1515	Hsp27	2.85293e-12	0.618206	1	0.992	5.70585e-09	GSC/CB/2-cc
1516	Jupiter	3.14268e-12	0.528548	1	1	6.28536e-09	GSC/CB/2-cc
1517	krimp	3.29743e-12	0.570304	1	0.857	6.59486e-09	GSC/CB/2-cc
1518	RpS19b	3.47986e-12	0.656599	1	0.889	6.95973e-09	GSC/CB/2-cc
1519	Hsp26	3.66122e-12	0.507116	1	0.973	7.32245e-09	GSC/CB/2-cc
1520	Rpt3R	3.75922e-12	0.390549	0.971	0.617	7.51844e-09	GSC/CB/2-cc
1521	CG8223	4.53958e-12	0.519119	1	0.946	9.07917e-09	GSC/CB/2-cc
1522	CG9135	5.74404e-12	0.483671	1	0.759	1.14881e-08	GSC/CB/2-cc
1523	Drep2	6.84181e-12	0.601268	0.971	0.853	1.36836e-08	GSC/CB/2-cc
1524	aurB	1.22131e-11	0.554486	1	0.844	2.44262e-08	GSC/CB/2-cc
1525	CG32814	1.70869e-11	0.426709	0.857	0.495	3.41739e-08	GSC/CB/2-cc
1526	His2Av	2.37897e-11	0.411765	1	0.999	4.75794e-08	GSC/CB/2-cc
1527	aub	3.77031e-11	0.444923	1	0.95	7.54062e-08	GSC/CB/2-cc
1528	Act5C	4.26536e-11	0.406777	1	1	8.53073e-08	GSC/CB/2-cc
1529	Ubi-p63E	5.55912e-11	0.557709	1	0.816	1.11182e-07	GSC/CB/2-cc
1530	lbk	5.7474e-11	0.355851	1	0.713	1.14948e-07	GSC/CB/2-cc
1531	CG8066	7.35215e-11	0.381065	0.971	0.672	1.47043e-07	GSC/CB/2-cc
1532	CG1503	8.50372e-11	0.27479	0.971	0.546	1.70074e-07	GSC/CB/2-cc
1533	alphaTub84B	1.09276e-10	0.468788	1	0.999	2.18553e-07	GSC/CB/2-cc
1534	CG4949	1.14449e-10	0.433532	0.971	0.733	2.28898e-07	GSC/CB/2-cc
1535	Bgb	1.20107e-10	0.454283	1	0.722	2.40214e-07	GSC/CB/2-cc
1536	Sans	2.38624e-10	0.286029	0.971	0.517	4.77248e-07	GSC/CB/2-cc
1537	fzy	6.01264e-10	0.376928	1	0.668	1.20253e-06	GSC/CB/2-cc
1538	betaTub56D	6.59801e-10	0.386634	1	0.999	1.3196e-06	GSC/CB/2-cc
1539	CG6084	6.96557e-10	0.458862	1	0.881	1.39311e-06	GSC/CB/2-cc
1540	CG12702	7.16422e-10	0.260297	1	0.606	1.43284e-06	GSC/CB/2-cc
1541	CG15172	8.89622e-10	0.292929	0.857	0.59	1.77924e-06	GSC/CB/2-cc
1542	vas	1.1127e-09	0.387083	1	0.879	2.2254e-06	GSC/CB/2-cc
1543	Gbeta13F	1.19541e-09	0.479644	1	0.989	2.39082e-06	GSC/CB/2-cc
1544	unc-13	1.26276e-09	0.465819	1	0.86	2.52553e-06	GSC/CB/2-cc
1545	Pen	1.28729e-09	0.418522	1	0.904	2.57458e-06	GSC/CB/2-cc
1546	tut	1.33128e-09	0.257413	0.8	0.442	2.66255e-06	GSC/CB/2-cc
1547	Tsp42Ef	1.35174e-09	0.335879	1	0.666	2.70348e-06	GSC/CB/2-cc
1548	mamo	1.37086e-09	0.511962	0.943	0.67	2.74173e-06	GSC/CB/2-cc
1549	D1	1.50831e-09	0.349649	1	0.997	3.01662e-06	GSC/CB/2-cc
1550	mad2	1.97103e-09	0.425011	1	0.881	3.94206e-06	GSC/CB/2-cc
1551	CycE	2.38702e-09	0.317878	0.971	0.603	4.77405e-06	GSC/CB/2-cc
1552	Cap-D2	2.46905e-09	0.253796	0.971	0.623	4.93809e-06	GSC/CB/2-cc
1553	Ote	2.92193e-09	0.450254	0.971	0.772	5.84387e-06	GSC/CB/2-cc
1554	Rrp1	3.04031e-09	0.411841	1	0.835	6.08062e-06	GSC/CB/2-cc
1555	Sodh-2	3.23702e-09	0.377844	0.971	0.731	6.47404e-06	GSC/CB/2-cc
1556	Mcm3	3.28663e-09	0.493895	1	0.827	6.57327e-06	GSC/CB/2-cc
1557	pnt	3.31042e-09	0.260936	1	0.684	6.62084e-06	GSC/CB/2-cc
1558	msd1	3.43828e-09	0.436828	1	0.831	6.87656e-06	GSC/CB/2-cc
1559	CG1827	3.45907e-09	0.260485	0.971	0.584	6.91813e-06	GSC/CB/2-cc
1560	tej	3.748e-09	0.360792	1	0.835	7.49601e-06	GSC/CB/2-cc
1561	cav	7.59073e-09	0.397303	1	0.71	1.51815e-05	GSC/CB/2-cc
1562	CR43334	8.06342e-09	0.379034	0.943	0.599	1.61268e-05	GSC/CB/2-cc
1563	Ant2	8.9052e-09	0.439467	0.971	0.548	1.78104e-05	GSC/CB/2-cc
1564	CG34261	9.38259e-09	0.375897	1	0.686	1.87652e-05	GSC/CB/2-cc
1565	CG4300	1.05819e-08	0.341364	1	0.73	2.11639e-05	GSC/CB/2-cc
1566	cmet	1.1735e-08	0.300862	1	0.749	2.34699e-05	GSC/CB/2-cc
1567	karr	1.2459e-08	0.306975	0.829	0.577	2.49181e-05	GSC/CB/2-cc
1568	CG14657	1.36346e-08	0.335381	0.971	0.697	2.72691e-05	GSC/CB/2-cc
1569	CR43870	1.49482e-08	0.323563	0.8	0.401	2.98965e-05	GSC/CB/2-cc
1570	wap	2.5487e-08	0.421136	1	0.851	5.09739e-05	GSC/CB/2-cc
1571	CG3638	2.58579e-08	0.286117	0.971	0.639	5.17158e-05	GSC/CB/2-cc
1572	HP6	2.62517e-08	0.256899	0.857	0.498	5.25034e-05	GSC/CB/2-cc
1573	CG11825	2.78124e-08	0.310996	0.857	0.498	5.56247e-05	GSC/CB/2-cc
1574	CG17265	3.10721e-08	0.283183	1	0.608	6.21443e-05	GSC/CB/2-cc
1575	unc-119	3.31747e-08	0.308851	0.943	0.68	6.63494e-05	GSC/CB/2-cc
1576	Chd64	3.33348e-08	0.369932	1	0.656	6.66697e-05	GSC/CB/2-cc
1577	eIF4G2	3.44588e-08	0.387065	1	0.882	6.89175e-05	GSC/CB/2-cc
1578	Mcr	4.87875e-08	0.265781	1	0.718	9.75749e-05	GSC/CB/2-cc
1579	RnrL	5.13386e-08	0.411915	1	0.808	0.000102677	GSC/CB/2-cc
1580	CG34323	5.14451e-08	0.415263	1	0.812	0.00010289	GSC/CB/2-cc
1581	CG5194	5.50895e-08	0.317482	1	0.925	0.000110179	GSC/CB/2-cc
1582	Gnf1	5.79645e-08	0.415982	1	0.819	0.000115929	GSC/CB/2-cc
1583	HipHop	7.18828e-08	0.36132	1	0.826	0.000143766	GSC/CB/2-cc
1584	Pdk	7.53587e-08	0.264385	0.943	0.69	0.000150717	GSC/CB/2-cc
1585	stai	7.67156e-08	0.475294	1	0.95	0.000153431	GSC/CB/2-cc
1586	Oxp	8.49542e-08	0.332265	1	0.754	0.000169908	GSC/CB/2-cc
1587	Syx4	1.01348e-07	0.276204	0.943	0.574	0.000202695	GSC/CB/2-cc
1588	CG6693	1.18166e-07	0.351183	1	0.86	0.000236331	GSC/CB/2-cc
1589	CG8289	1.47733e-07	0.363235	1	0.895	0.000295467	GSC/CB/2-cc
1590	CG10063	1.90592e-07	0.405353	0.857	0.511	0.000381183	GSC/CB/2-cc
1591	CG14931	1.96975e-07	0.267278	1	0.763	0.00039395	GSC/CB/2-cc
1592	PCNA	2.06284e-07	0.488698	1	0.906	0.000412569	GSC/CB/2-cc
1593	CG9003	4.22948e-07	0.261797	1	0.707	0.000845896	GSC/CB/2-cc
1594	arm	6.66673e-07	0.34202	1	0.958	0.00133335	GSC/CB/2-cc
1595	PMP34	7.08971e-07	0.314908	0.971	0.77	0.00141794	GSC/CB/2-cc
1596	p120ctn	8.95763e-07	0.327429	1	0.844	0.00179153	GSC/CB/2-cc
1597	CR42254	9.10987e-07	0.299588	1	0.744	0.00182197	GSC/CB/2-cc
1598	CG9926	1.10333e-06	0.306626	1	0.92	0.00220665	GSC/CB/2-cc
1599	CG42232	1.13069e-06	0.329111	1	0.76	0.00226139	GSC/CB/2-cc
1600	Paip2	1.13806e-06	0.304492	1	0.754	0.00227611	GSC/CB/2-cc
1601	enc	1.18672e-06	0.322674	1	0.817	0.00237345	GSC/CB/2-cc
1602	tum	1.24274e-06	0.260232	1	0.689	0.00248548	GSC/CB/2-cc
1603	l(2)k09913	1.71676e-06	0.323229	1	0.843	0.00343352	GSC/CB/2-cc
1604	CG2247	2.39075e-06	0.257199	1	0.815	0.00478149	GSC/CB/2-cc
1605	chrb	2.8893e-06	0.35209	1	0.889	0.0057786	GSC/CB/2-cc
1606	bam	3.12702e-06	0.293167	1	0.691	0.00625404	GSC/CB/2-cc
1607	CG3011	3.40755e-06	0.296769	1	0.957	0.00681509	GSC/CB/2-cc
1608	CG11267	5.20905e-06	0.293259	1	0.969	0.0104181	GSC/CB/2-cc
1609	baf	5.22321e-06	0.341532	1	0.983	0.0104464	GSC/CB/2-cc
1610	Mink	1.03372e-05	0.269357	1	0.763	0.0206745	GSC/CB/2-cc
1611	CG14561	1.03778e-05	0.255707	1	0.771	0.0207557	GSC/CB/2-cc
1612	glu	1.75023e-05	0.319075	1	0.835	0.0350046	GSC/CB/2-cc
1613	5.8SrRNA-Psi:CR45863	1.79064e-05	0.321932	1	0.882	0.0358129	GSC/CB/2-cc
1614	Fer2LCH	1.90408e-05	0.318573	1	0.971	0.0380816	GSC/CB/2-cc
1615	mei-P26	2.29602e-05	0.333057	1	0.966	0.0459205	GSC/CB/2-cc
1616	how	2.66038e-05	0.262945	0.943	0.703	0.0532077	GSC/CB/2-cc
1617	SMC2	3.6969e-05	0.291238	1	0.852	0.073938	GSC/CB/2-cc
1618	shep	4.53899e-05	0.260937	1	0.978	0.0907797	GSC/CB/2-cc
1619	trsn	5.42844e-05	0.251161	1	0.94	0.108569	GSC/CB/2-cc
1620	CG9821	7.36048e-05	0.252589	1	0.991	0.14721	GSC/CB/2-cc
1621	Pdi	0.000230736	0.306403	0.971	0.755	0.461473	GSC/CB/2-cc
1622	Gbeta13F	1.34245e-79	0.908719	1	0.988	2.68489e-76	4-cc
1623	Df31	1.703e-76	0.883488	1	1	3.40601e-73	4-cc
1624	Rbfox1	3.15067e-75	1.11911	1	0.899	6.30135e-72	4-cc
1625	bam	7.1774e-75	1.13021	0.976	0.649	1.43548e-71	4-cc
1626	Hsp27	3.26921e-73	0.913612	1	0.991	6.53843e-70	4-cc
1627	D1	1.64809e-69	0.65292	1	0.997	3.29617e-66	4-cc
1628	Jupiter	9.39346e-69	0.706218	1	1	1.87869e-65	4-cc
1629	baf	1.32736e-68	0.891447	1	0.981	2.65472e-65	4-cc
1630	CG7372	1.98778e-67	0.933361	0.994	0.828	3.97555e-64	4-cc
1631	Hsp23	2.18906e-64	0.974923	1	0.904	4.37813e-61	4-cc
1632	Chrac-16	5.99952e-64	0.856123	0.994	0.931	1.1999e-60	4-cc
1633	aurB	8.34969e-64	0.868508	0.97	0.827	1.66994e-60	4-cc
1634	HmgD	8.75035e-64	0.86156	1	1	1.75007e-60	4-cc
1635	pav	9.15311e-64	0.809307	0.994	0.858	1.83062e-60	4-cc
1636	E(spl)mgamma-HLH	2.08612e-63	0.705523	0.869	0.366	4.17223e-60	4-cc
1637	Act42A	5.5687e-63	0.698877	1	0.965	1.11374e-59	4-cc
1638	E(spl)m8-HLH	1.10603e-60	1.28969	0.929	0.324	2.21205e-57	4-cc
1639	CG8223	4.78758e-60	0.744315	0.994	0.939	9.57515e-57	4-cc
1640	mad2	9.76559e-60	0.692446	0.994	0.864	1.95312e-56	4-cc
1641	HipHop	8.07063e-57	0.685296	0.97	0.805	1.61413e-53	4-cc
1642	sti	5.33887e-55	0.697119	0.964	0.623	1.06777e-51	4-cc
1643	TfIIA-S	6.18565e-55	0.560076	1	0.988	1.23713e-51	4-cc
1644	Ant2	6.59529e-55	0.775089	0.976	0.484	1.31906e-51	4-cc
1645	p120ctn	7.03625e-54	0.639989	0.982	0.824	1.40725e-50	4-cc
1646	kuk	7.46106e-54	0.726183	1	0.88	1.49221e-50	4-cc
1647	enc	1.04382e-51	0.720094	0.97	0.795	2.08763e-48	4-cc
1648	His2Av	1.10605e-51	0.449487	1	0.999	2.21209e-48	4-cc
1649	wap	1.7542e-51	0.667316	0.982	0.832	3.5084e-48	4-cc
1650	CG9135	3.43411e-51	0.736382	0.964	0.729	6.86822e-48	4-cc
1651	alphaTub84B	1.73214e-48	0.560164	1	0.999	3.46428e-45	4-cc
1652	borr	5.91224e-48	0.601585	0.982	0.843	1.18245e-44	4-cc
1653	asf1	8.05036e-47	0.601585	1	0.923	1.61007e-43	4-cc
1654	heph	2.25982e-46	0.696934	0.97	0.824	4.51965e-43	4-cc
1655	E(spl)m7-HLH	3.44567e-45	1.69185	0.917	0.657	6.89134e-42	4-cc
1656	CtBP	4.6985e-45	0.523707	1	0.992	9.39701e-42	4-cc
1657	Top2	4.82308e-45	0.647361	0.994	0.903	9.64616e-42	4-cc
1658	SMC2	6.74654e-45	0.604119	0.994	0.831	1.34931e-41	4-cc
1659	betaTub56D	1.16565e-44	0.462359	1	0.999	2.33131e-41	4-cc
1660	cmet	1.93449e-44	0.542053	0.94	0.723	3.86899e-41	4-cc
1661	mahe	3.64947e-44	0.702654	0.976	0.892	7.29894e-41	4-cc
1662	Bacc	5.70401e-44	0.678305	1	0.999	1.1408e-40	4-cc
1663	Cdc6	8.13974e-44	0.587062	0.964	0.803	1.62795e-40	4-cc
1664	c(3)G	4.10796e-43	0.456992	1	0.887	8.21592e-40	4-cc
1665	Lam	5.12274e-42	0.564041	1	0.98	1.02455e-38	4-cc
1666	mub	3.18278e-41	0.57577	0.988	0.861	6.36555e-38	4-cc
1667	Poc1	6.52944e-41	0.50981	0.899	0.566	1.30589e-37	4-cc
1668	HmgZ	9.06247e-41	0.728056	0.929	0.664	1.81249e-37	4-cc
1669	blanks	9.10737e-41	0.402542	0.863	0.451	1.82147e-37	4-cc
1670	E(spl)mbeta-HLH	3.19829e-40	0.52001	0.917	0.566	6.39657e-37	4-cc
1671	RNASEK	1.33213e-39	0.50766	1	0.984	2.66427e-36	4-cc
1672	mei-P26	1.38914e-39	0.57281	1	0.96	2.77828e-36	4-cc
1673	Det	8.55265e-39	0.522796	0.976	0.813	1.71053e-35	4-cc
1674	Fas2	1.18785e-38	0.611471	0.929	0.745	2.37569e-35	4-cc
1675	CG5885	1.968e-38	0.439129	1	0.976	3.936e-35	4-cc
1676	polo	1.05311e-37	0.526584	0.952	0.745	2.10622e-34	4-cc
1677	corolla	4.29631e-37	0.533654	0.94	0.708	8.59261e-34	4-cc
1678	mnb	5.49498e-37	0.462526	1	0.969	1.099e-33	4-cc
1679	CG9705	6.82014e-37	0.506576	0.976	0.89	1.36403e-33	4-cc
1680	LanB1	2.64523e-36	0.394108	0.911	0.598	5.29045e-33	4-cc
1681	ed	5.74613e-36	0.520362	0.935	0.71	1.14923e-32	4-cc
1682	Nrt	8.97203e-36	0.443279	0.911	0.633	1.79441e-32	4-cc
1683	CR43651	9.35209e-36	0.387355	0.881	0.689	1.87042e-32	4-cc
1684	fzy	9.98087e-36	0.465535	0.917	0.634	1.99617e-32	4-cc
1685	Rcd-1	1.26535e-35	0.51995	0.988	0.922	2.53069e-32	4-cc
1686	CG34323	1.3674e-34	0.537707	0.994	0.785	2.73479e-31	4-cc
1687	unc-119	3.90499e-33	0.493051	0.911	0.647	7.80997e-30	4-cc
1688	CG32280	6.91052e-33	0.402989	0.893	0.624	1.3821e-29	4-cc
1689	CG6540	5.64352e-32	0.39872	0.994	0.918	1.1287e-28	4-cc
1690	RhoGEF4	9.41054e-32	0.452515	0.911	0.713	1.88211e-28	4-cc
1691	glu	2.02856e-31	0.460116	0.976	0.814	4.05711e-28	4-cc
1692	CG17574	3.29111e-31	0.395973	0.946	0.7	6.58222e-28	4-cc
1693	chinmo	3.81353e-31	0.523631	0.952	0.683	7.62707e-28	4-cc
1694	HP6	7.30615e-31	0.402443	0.78	0.459	1.46123e-27	4-cc
1695	CG31125	1.25026e-30	0.305495	0.839	0.477	2.50051e-27	4-cc
1696	Chrac-14	1.49541e-30	0.393122	1	0.946	2.99082e-27	4-cc
1697	CG42232	1.88981e-30	0.500147	0.946	0.734	3.77962e-27	4-cc
1698	Cap-D2	2.57831e-30	0.384435	0.863	0.591	5.15662e-27	4-cc
1699	jumu	2.63643e-30	0.432658	0.917	0.698	5.27287e-27	4-cc
1700	ncd	2.76804e-30	0.442823	0.929	0.764	5.53608e-27	4-cc
1701	Ndc80	2.83921e-30	0.434091	0.946	0.785	5.67841e-27	4-cc
1702	BicD	3.04817e-30	0.391502	0.964	0.891	6.09633e-27	4-cc
1703	Mink	4.55288e-29	0.46486	0.94	0.738	9.10576e-26	4-cc
1704	Bgb	6.40287e-29	0.385117	0.952	0.69	1.28057e-25	4-cc
1705	trsn	8.22938e-29	0.433731	0.994	0.932	1.64588e-25	4-cc
1706	Hsp83	8.33745e-29	0.331775	1	0.999	1.66749e-25	4-cc
1707	Acf	1.22026e-28	0.427295	0.946	0.806	2.44052e-25	4-cc
1708	RfC38	1.29388e-28	0.402965	0.976	0.891	2.58775e-25	4-cc
1709	CR43857	1.44219e-28	0.386598	0.768	0.463	2.88439e-25	4-cc
1710	CG13029	2.60026e-28	0.3923	0.899	0.588	5.20053e-25	4-cc
1711	Hipk	4.41169e-28	0.374026	0.905	0.67	8.82337e-25	4-cc
1712	Smn	1.22414e-27	0.33872	0.994	0.98	2.44827e-24	4-cc
1713	scra	2.84891e-27	0.413622	0.952	0.778	5.69782e-24	4-cc
1714	RpS10a	3.08874e-27	0.478913	0.994	0.776	6.17749e-24	4-cc
1715	ball	3.18541e-27	0.402498	0.982	0.907	6.37083e-24	4-cc
1716	Pcl	3.35883e-27	0.384167	0.964	0.856	6.71766e-24	4-cc
1717	Mcm3	4.09898e-27	0.463422	0.94	0.812	8.19796e-24	4-cc
1718	Bsg	4.2313e-27	0.375632	0.994	0.965	8.46259e-24	4-cc
1719	CG1888	4.75359e-27	0.403107	0.97	0.87	9.50718e-24	4-cc
1720	Mcr	6.16364e-27	0.422567	0.887	0.696	1.23273e-23	4-cc
1721	Tapdelta	2.09232e-26	0.312193	1	0.997	4.18464e-23	4-cc
1722	unc-13	2.74247e-26	0.436678	0.988	0.841	5.48494e-23	4-cc
1723	hdm	7.30933e-26	0.28283	0.798	0.378	1.46187e-22	4-cc
1724	CG8490	7.73874e-26	0.403412	0.964	0.805	1.54775e-22	4-cc
1725	PCNA	9.97392e-26	0.509979	0.97	0.897	1.99478e-22	4-cc
1726	Ubi-p63E	1.65259e-25	0.455829	0.964	0.795	3.30518e-22	4-cc
1727	CG1943	7.7171e-25	0.364824	1	0.998	1.54342e-21	4-cc
1728	Ote	2.49655e-24	0.405793	0.946	0.746	4.9931e-21	4-cc
1729	msd5	2.65749e-24	0.345919	0.929	0.749	5.31498e-21	4-cc
1730	Cks30A	3.10393e-24	0.399091	0.863	0.674	6.20787e-21	4-cc
1731	Spc105R	9.41775e-24	0.295437	0.857	0.583	1.88355e-20	4-cc
1732	dup	1.11276e-23	0.406958	0.905	0.747	2.22553e-20	4-cc
1733	Gnf1	1.29891e-23	0.360409	0.952	0.801	2.59782e-20	4-cc
1734	CR31044	1.44326e-23	0.570021	0.946	0.814	2.88652e-20	4-cc
1735	CR42862	1.81686e-23	0.393158	0.976	0.741	3.63372e-20	4-cc
1736	CG10326	3.83057e-23	0.331371	0.976	0.937	7.66115e-20	4-cc
1737	Fas1	4.01735e-23	0.394923	0.923	0.78	8.0347e-20	4-cc
1738	CG14561	5.6657e-23	0.365767	0.946	0.746	1.13314e-19	4-cc
1739	l(2)k09913	5.91255e-23	0.326811	0.946	0.829	1.18251e-19	4-cc
1740	RnrL	1.13855e-22	0.401288	0.905	0.797	2.27709e-19	4-cc
1741	CG4949	2.62619e-22	0.374275	0.863	0.718	5.25238e-19	4-cc
1742	CycA	1.19e-21	0.348591	0.946	0.867	2.38e-18	4-cc
1743	Cenp-C	1.46207e-21	0.390922	0.875	0.732	2.92414e-18	4-cc
1744	CG8289	4.57246e-21	0.318555	0.982	0.882	9.14492e-18	4-cc
1745	Claspin	8.94707e-21	0.391068	0.958	0.882	1.78941e-17	4-cc
1746	SMC1	9.4539e-21	0.335357	0.964	0.809	1.89078e-17	4-cc
1747	qin	1.28573e-20	0.385655	0.935	0.712	2.57146e-17	4-cc
1748	CG13540	2.55681e-20	0.36253	0.726	0.486	5.11361e-17	4-cc
1749	RnrS	4.07936e-20	0.324066	0.958	0.846	8.15872e-17	4-cc
1750	l(3)L1231	4.18729e-20	0.386679	0.946	0.838	8.37458e-17	4-cc
1751	CG45050	5.22112e-20	0.325785	0.994	0.94	1.04422e-16	4-cc
1752	CG14932	4.16026e-19	0.354125	0.958	0.715	8.32051e-16	4-cc
1753	RPA2	4.55601e-19	0.302444	1	0.959	9.11202e-16	4-cc
1754	CG43427	4.67141e-19	0.251232	0.923	0.762	9.34281e-16	4-cc
1755	Sec61beta	4.68602e-19	0.258831	1	0.99	9.37204e-16	4-cc
1756	CG7593	5.75113e-19	0.343313	0.935	0.83	1.15023e-15	4-cc
1757	ERp60	6.59163e-19	0.308939	0.982	0.92	1.31833e-15	4-cc
1758	CG6693	1.99958e-18	0.298272	0.964	0.846	3.99916e-15	4-cc
1759	mxc	2.61041e-18	0.284824	0.893	0.613	5.22083e-15	4-cc
1760	dgt4	2.82664e-18	0.29194	0.946	0.861	5.65328e-15	4-cc
1761	CG8300	5.84666e-18	0.316589	0.952	0.786	1.16933e-14	4-cc
1762	Nse1	7.57438e-18	0.29707	0.935	0.77	1.51488e-14	4-cc
1763	kuz	9.75558e-18	0.286811	0.905	0.761	1.95112e-14	4-cc
1764	Oxp	1.01673e-17	0.351418	0.911	0.734	2.03346e-14	4-cc
1765	nudE	1.08209e-17	0.26695	0.952	0.802	2.16419e-14	4-cc
1766	CG11885	1.5576e-17	0.256014	0.958	0.792	3.1152e-14	4-cc
1767	nmo	1.85642e-17	0.301359	1	0.969	3.71283e-14	4-cc
1768	CG10336	2.60747e-17	0.333833	0.911	0.785	5.21494e-14	4-cc
1769	msd1	2.65945e-17	0.335511	0.917	0.821	5.3189e-14	4-cc
1770	CG43736	4.79875e-17	0.35871	0.958	0.875	9.59749e-14	4-cc
1771	PMP34	4.87936e-17	0.278108	0.917	0.75	9.75873e-14	4-cc
1772	Hsp26	7.93932e-17	0.277537	1	0.969	1.58786e-13	4-cc
1773	pim	1.06831e-16	0.257886	0.875	0.65	2.13663e-13	4-cc
1774	hrg	1.30002e-16	0.333664	0.982	0.865	2.60004e-13	4-cc
1775	cona	1.41955e-16	0.324787	0.982	0.851	2.8391e-13	4-cc
1776	CG9272	1.49864e-16	0.258373	0.911	0.762	2.99727e-13	4-cc
1777	CG7154	1.76756e-16	0.283505	0.958	0.905	3.53511e-13	4-cc
1778	Rrp1	2.70729e-16	0.324228	0.923	0.824	5.41458e-13	4-cc
1779	CG44774	3.47811e-16	0.291116	1	0.939	6.95621e-13	4-cc
1780	Caf1-180	3.49099e-16	0.33237	0.911	0.794	6.98199e-13	4-cc
1781	Sec61alpha	6.05571e-16	0.335142	0.946	0.891	1.21114e-12	4-cc
1782	Mis12	7.87051e-16	0.254244	0.899	0.709	1.5741e-12	4-cc
1783	msps	2.07717e-15	0.297198	0.905	0.832	4.15434e-12	4-cc
1784	CG9925	3.17292e-15	0.276498	0.929	0.805	6.34583e-12	4-cc
1785	Pka-C1	8.06696e-15	0.279049	0.976	0.87	1.61339e-11	4-cc
1786	egg	2.60248e-14	0.264584	0.911	0.803	5.20497e-11	4-cc
1787	Pa1	3.51218e-14	0.269016	0.982	0.886	7.02437e-11	4-cc
1788	dpa	4.99082e-14	0.251146	0.881	0.74	9.98163e-11	4-cc
1789	CG5194	1.54598e-13	0.291144	0.988	0.916	3.09196e-10	4-cc
1790	CtsB1	5.03933e-13	0.298363	0.929	0.867	1.00787e-09	4-cc
1791	Incenp	4.09623e-12	0.263884	0.976	0.899	8.19245e-09	4-cc
1792	Tm1	4.60678e-12	0.259364	0.94	0.898	9.21356e-09	4-cc
1793	dnk	8.61368e-12	0.26513	0.946	0.86	1.72274e-08	4-cc
1794	Tsp39D	1.78409e-11	0.268879	0.875	0.75	3.56818e-08	4-cc
1795	E(spl)m2-BFM	7.68054e-11	0.351097	0.685	0.612	1.53611e-07	4-cc
1796	CR43264	1.00009e-10	0.433705	0.798	0.644	2.00019e-07	4-cc
1797	Drep2	1.18987e-10	0.258783	0.929	0.844	2.37973e-07	4-cc
1798	Mcm7	1.3175e-10	0.265878	0.845	0.718	2.635e-07	4-cc
1799	krimp	6.47059e-10	0.273285	0.899	0.855	1.29412e-06	4-cc
1800	5.8SrRNA-Psi:CR45863	1.65042e-08	0.303519	0.976	0.869	3.30083e-05	4-cc
1801	RnrS	1.81571e-47	1.02516	0.99	0.851	3.63143e-44	8-cc
1802	HmgD	3.79865e-46	0.893399	1	1	7.5973e-43	8-cc
1803	asf1	1.97882e-44	0.863772	1	0.928	3.95764e-41	8-cc
1804	Lam	8.69764e-34	0.636455	1	0.981	1.73953e-30	8-cc
1805	RPA2	2.83769e-33	0.632974	0.99	0.963	5.67539e-30	8-cc
1806	CG44774	3.27888e-33	0.654275	1	0.943	6.55775e-30	8-cc
1807	Df31	3.33554e-33	0.657696	1	1	6.67107e-30	8-cc
1808	Claspin	1.61794e-32	0.778779	0.99	0.884	3.23588e-29	8-cc
1809	mamo	8.09255e-31	0.71968	0.96	0.649	1.61851e-27	8-cc
1810	Ant2	1.35212e-30	0.702883	0.97	0.519	2.70424e-27	8-cc
1811	Top2	4.30003e-29	0.672382	0.99	0.909	8.60007e-26	8-cc
1812	Ts	5.89941e-29	0.711888	0.98	0.798	1.17988e-25	8-cc
1813	Ssb-c31a	1.12043e-27	0.480779	1	0.995	2.24086e-24	8-cc
1814	Bacc	1.53404e-27	0.609683	1	0.999	3.06807e-24	8-cc
1815	baf	3.97697e-27	0.601304	1	0.982	7.95395e-24	8-cc
1816	Rbfox1	5.21293e-27	0.665092	0.99	0.907	1.04259e-23	8-cc
1817	Mis12	1.61186e-25	0.639618	0.931	0.719	3.22372e-22	8-cc
1818	dnk	3.10902e-24	0.683884	0.941	0.866	6.21803e-21	8-cc
1819	Src64B	1.02218e-23	0.548062	0.99	0.896	2.04437e-20	8-cc
1820	Tapdelta	1.84072e-23	0.334611	1	0.997	3.68145e-20	8-cc
1821	trsn	3.89076e-23	0.496782	0.99	0.937	7.78152e-20	8-cc
1822	CG7593	6.86143e-23	0.547229	0.96	0.835	1.37229e-19	8-cc
1823	Ubi-p5E	1.4443e-22	0.514054	0.98	0.946	2.8886e-19	8-cc
1824	Jupiter	2.96651e-22	0.416184	1	1	5.93301e-19	8-cc
1825	borr	1.55734e-21	0.520641	0.98	0.853	3.11469e-18	8-cc
1826	RfC38	3.32146e-21	0.470495	0.99	0.896	6.64292e-18	8-cc
1827	CG6540	3.39748e-21	0.492895	0.99	0.924	6.79497e-18	8-cc
1828	CG9801	3.72168e-21	0.255016	0.861	0.593	7.44335e-18	8-cc
1829	blanks	1.82194e-20	0.350537	0.861	0.48	3.64388e-17	8-cc
1830	Mcm5	1.98304e-20	0.435959	0.96	0.787	3.96608e-17	8-cc
1831	mnb	5.44353e-20	0.437476	1	0.972	1.08871e-16	8-cc
1832	DNApol-alpha180	5.6721e-20	0.523395	0.921	0.712	1.13442e-16	8-cc
1833	SMC1	8.69829e-20	0.511866	0.95	0.821	1.73966e-16	8-cc
1834	mei-P26	4.50102e-19	0.483709	1	0.963	9.00204e-16	8-cc
1835	scramb1	5.84616e-19	0.466254	0.95	0.753	1.16923e-15	8-cc
1836	CtBP	6.62356e-19	0.393705	1	0.993	1.32471e-15	8-cc
1837	Reep1	8.84376e-19	0.459765	0.95	0.769	1.76875e-15	8-cc
1838	NaCP60E	1.24903e-18	0.284447	0.911	0.665	2.49806e-15	8-cc
1839	CG10151	1.78665e-18	0.312048	0.871	0.526	3.5733e-15	8-cc
1840	c(3)G	2.25575e-18	0.500641	0.99	0.896	4.51151e-15	8-cc
1841	egg	3.00805e-18	0.461334	0.96	0.805	6.01611e-15	8-cc
1842	RfC4	7.52516e-18	0.357902	1	0.979	1.50503e-14	8-cc
1843	mt:lrRNA	9.17653e-18	0.380169	1	0.997	1.83531e-14	8-cc
1844	28SrRNA-Psi:CR45855	1.35785e-17	0.423609	1	1	2.7157e-14	8-cc
1845	CG10880	2.55799e-17	0.440241	0.98	0.877	5.11597e-14	8-cc
1846	rad50	3.23688e-17	0.401136	0.96	0.802	6.47376e-14	8-cc
1847	CG8300	4.96398e-17	0.379584	0.96	0.797	9.92796e-14	8-cc
1848	CG32243	8.91234e-17	0.436869	0.96	0.781	1.78247e-13	8-cc
1849	kcc	8.97013e-17	0.2865	0.881	0.589	1.79403e-13	8-cc
1850	CycE	1.19022e-16	0.637281	0.792	0.597	2.38043e-13	8-cc
1851	Hsp27	1.7112e-16	0.467082	1	0.992	3.42239e-13	8-cc
1852	CG6693	1.96386e-16	0.427454	0.95	0.856	3.92772e-13	8-cc
1853	Akap200	2.44389e-16	0.361563	1	0.972	4.88778e-13	8-cc
1854	CG15891	3.85793e-16	0.404868	0.99	0.878	7.71586e-13	8-cc
1855	CG34323	5.0016e-16	0.491905	0.97	0.802	1.00032e-12	8-cc
1856	Cap-D2	5.34502e-16	0.316975	0.891	0.607	1.069e-12	8-cc
1857	CG1910	2.1179e-15	0.372743	1	0.992	4.23579e-12	8-cc
1858	CG10326	2.12274e-15	0.404433	0.98	0.939	4.24548e-12	8-cc
1859	E(spl)m7-HLH	3.00434e-15	0.668575	0.842	0.683	6.00867e-12	8-cc
1860	HipHop	6.31897e-15	0.401256	0.921	0.822	1.26379e-11	8-cc
1861	CG10336	1.24576e-14	0.427924	0.921	0.793	2.49152e-11	8-cc
1862	CG30383	1.50574e-14	0.375666	0.772	0.464	3.01148e-11	8-cc
1863	NaPi-III	1.69729e-14	0.399112	0.98	0.821	3.39458e-11	8-cc
1864	Rab27	2.48819e-14	0.354233	0.921	0.712	4.97638e-11	8-cc
1865	CG1943	2.7898e-14	0.315211	1	0.998	5.57959e-11	8-cc
1866	msd1	4.88223e-14	0.409482	0.931	0.826	9.76445e-11	8-cc
1867	chrb	5.10388e-14	0.35373	0.97	0.884	1.02078e-10	8-cc
1868	Pka-C1	5.38801e-14	0.410795	0.96	0.879	1.0776e-10	8-cc
1869	CG8289	5.53704e-14	0.503643	0.98	0.889	1.10741e-10	8-cc
1870	Caf1-180	8.67113e-14	0.384888	0.921	0.801	1.73423e-10	8-cc
1871	Det	1.09558e-13	0.3725	0.96	0.826	2.19117e-10	8-cc
1872	Tsp39D	1.80552e-13	0.332914	0.931	0.753	3.61104e-10	8-cc
1873	HmgZ	3.62074e-13	0.426627	0.861	0.689	7.24149e-10	8-cc
1874	PCNA	3.65293e-13	0.390063	0.99	0.9	7.30586e-10	8-cc
1875	CG6701	5.21448e-13	0.438049	0.921	0.84	1.0429e-09	8-cc
1876	Hsp23	6.26865e-13	0.336498	1	0.911	1.25373e-09	8-cc
1877	Slbp	7.50819e-13	0.330881	0.97	0.934	1.50164e-09	8-cc
1878	Sirup	9.54901e-13	0.389886	0.96	0.874	1.9098e-09	8-cc
1879	sti	1.10365e-12	0.361498	0.871	0.657	2.20731e-09	8-cc
1880	Nrt	1.92129e-12	0.329982	0.891	0.655	3.84258e-09	8-cc
1881	DNApol-alpha60	2.74037e-12	0.386335	0.851	0.702	5.48073e-09	8-cc
1882	CG14438	3.06064e-12	0.350357	0.97	0.787	6.12128e-09	8-cc
1883	Syx13	3.76629e-12	0.357933	0.901	0.733	7.53258e-09	8-cc
1884	Mcr	5.9151e-12	0.362448	0.861	0.713	1.18302e-08	8-cc
1885	CG43736	7.25049e-12	0.364222	0.96	0.881	1.4501e-08	8-cc
1886	CG15628	7.63863e-12	0.383285	0.871	0.608	1.52773e-08	8-cc
1887	ATPsynepsilonL	9.87091e-12	0.27626	0.792	0.507	1.97418e-08	8-cc
1888	CG5059	1.11381e-11	0.303411	0.99	0.821	2.22762e-08	8-cc
1889	X11Lbeta	1.16524e-11	0.279859	0.901	0.645	2.33049e-08	8-cc
1890	cathD	1.20911e-11	0.315088	0.96	0.881	2.41821e-08	8-cc
1891	E(spl)m8-HLH	1.22905e-11	0.524096	0.752	0.385	2.45811e-08	8-cc
1892	Dsp1	1.5665e-11	0.293222	1	0.975	3.13301e-08	8-cc
1893	cona	2.0413e-11	0.327878	0.97	0.861	4.0826e-08	8-cc
1894	Gp150	2.32174e-11	0.372462	0.911	0.731	4.64349e-08	8-cc
1895	Ibf2	3.64852e-11	0.322824	0.98	0.864	7.29703e-08	8-cc
1896	Chrac-14	4.6706e-11	0.266945	0.96	0.954	9.3412e-08	8-cc
1897	hrg	5.57031e-11	0.36548	0.95	0.877	1.11406e-07	8-cc
1898	msd5	5.74466e-11	0.337332	0.901	0.764	1.14893e-07	8-cc
1899	kuk	6.18828e-11	0.358844	0.96	0.893	1.23766e-07	8-cc
1900	Pur-alpha	6.86995e-11	0.356899	0.871	0.693	1.37399e-07	8-cc
1901	agt	7.63017e-11	0.331457	0.911	0.811	1.52603e-07	8-cc
1902	bun	9.94395e-11	0.308592	0.97	0.906	1.98879e-07	8-cc
1903	Bsg	1.03794e-10	0.314552	1	0.966	2.07589e-07	8-cc
1904	TfIIA-S	1.44628e-10	0.260718	1	0.988	2.89257e-07	8-cc
1905	Cdc6	2.00846e-10	0.395074	0.921	0.819	4.01692e-07	8-cc
1906	CG5885	3.30571e-10	0.262375	1	0.978	6.61142e-07	8-cc
1907	Mcm6	3.41435e-10	0.34844	0.921	0.762	6.82871e-07	8-cc
1908	enc	3.64531e-10	0.302912	0.931	0.812	7.29062e-07	8-cc
1909	ERp60	4.30057e-10	0.282032	0.99	0.923	8.60113e-07	8-cc
1910	psq	6.18337e-10	0.279786	0.99	0.958	1.23667e-06	8-cc
1911	ball	6.6381e-10	0.313551	0.921	0.919	1.32762e-06	8-cc
1912	RnrL	6.98311e-10	0.31058	0.911	0.804	1.39662e-06	8-cc
1913	spi	7.47887e-10	0.306118	0.871	0.668	1.49577e-06	8-cc
1914	Nse1	7.83768e-10	0.351805	0.891	0.786	1.56754e-06	8-cc
1915	CG14932	9.00738e-10	0.315311	0.95	0.733	1.80148e-06	8-cc
1916	Ndc80	7.73445e-09	0.261772	0.921	0.799	1.54689e-05	8-cc
1917	CG3630	9.55889e-09	0.276033	0.772	0.583	1.91178e-05	8-cc
1918	DNApol-alpha73	9.61514e-09	0.324471	0.861	0.699	1.92303e-05	8-cc
1919	corolla	9.76505e-09	0.346395	0.871	0.732	1.95301e-05	8-cc
1920	dpa	2.05176e-08	0.306518	0.851	0.753	4.10352e-05	8-cc
1921	ncd	6.55304e-08	0.269673	0.891	0.78	0.000131061	8-cc
1922	CG9752	6.64192e-08	0.286035	0.871	0.728	0.000132838	8-cc
1923	Skp2	7.81622e-08	0.333692	0.861	0.776	0.000156324	8-cc
1924	CR42862	1.34935e-07	0.268301	0.941	0.761	0.000269869	8-cc
1925	28SrRNA-Psi:CR45859	2.26418e-07	0.359347	1	1	0.000452837	8-cc
1926	Mcm2	9.09627e-07	0.256908	0.861	0.689	0.00181925	8-cc
1927	Orc1	9.3579e-07	0.359956	0.703	0.585	0.00187158	8-cc
1928	Rrp1	1.1428e-06	0.261101	0.941	0.829	0.00228559	8-cc
1929	cav	1.23159e-06	0.25647	0.871	0.703	0.00246318	8-cc
1930	ed	1.27394e-06	0.253265	0.822	0.738	0.00254788	8-cc
1931	CG2247	1.27412e-06	0.287994	0.941	0.808	0.00254824	8-cc
1932	Adf1	1.32437e-06	0.254493	0.901	0.74	0.00264873	8-cc
1933	Mcm3	1.63057e-06	0.259319	0.901	0.825	0.00326114	8-cc
1934	Mcm10	2.41468e-06	0.253103	0.772	0.643	0.00482936	8-cc
1935	dock	2.58939e-06	0.250516	0.871	0.763	0.00517878	8-cc
1936	DNA-ligI	5.40136e-06	0.276459	0.832	0.755	0.0108027	8-cc
1937	CG4570	5.43753e-05	0.258176	0.941	0.853	0.108751	8-cc
1938	Dsp1	4.76256e-48	0.800057	1	0.974	9.52512e-45	16-cc 2a I
1939	CG6770	1.44488e-46	0.78868	1	0.999	2.88976e-43	16-cc 2a I
1940	ovo	4.42813e-46	0.809937	1	0.932	8.85627e-43	16-cc 2a I
1941	Muc14A	1.17606e-45	0.322545	0.852	0.312	2.35211e-42	16-cc 2a I
1942	CG12200	1.13293e-43	0.885176	0.967	0.715	2.26586e-40	16-cc 2a I
1943	Ssb-c31a	2.88826e-37	0.509677	1	0.995	5.77651e-34	16-cc 2a I
1944	CR44292	9.94019e-37	0.367184	0.803	0.264	1.98804e-33	16-cc 2a I
1945	CG5059	4.84379e-36	0.750226	0.975	0.819	9.68757e-33	16-cc 2a I
1946	CG15628	2.3057e-35	0.738649	0.984	0.588	4.6114e-32	16-cc 2a I
1947	cona	1.13496e-34	0.662733	0.984	0.857	2.26993e-31	16-cc 2a I
1948	mei-P22	1.84387e-33	0.275395	0.787	0.355	3.68774e-30	16-cc 2a I
1949	bun	1.29687e-32	0.661554	0.992	0.902	2.59374e-29	16-cc 2a I
1950	X11Lbeta	2.4141e-32	0.620322	0.951	0.633	4.82821e-29	16-cc 2a I
1951	His3.3B	3.98806e-32	0.442166	1	0.999	7.97611e-29	16-cc 2a I
1952	sina	4.8476e-32	0.543446	1	0.946	9.69521e-29	16-cc 2a I
1953	fal	1.16706e-31	0.616452	0.967	0.821	2.33412e-28	16-cc 2a I
1954	CG9921	1.26569e-31	0.566305	0.959	0.819	2.53139e-28	16-cc 2a I
1955	Sirup	4.88509e-31	0.65024	0.992	0.868	9.77017e-28	16-cc 2a I
1956	Cks85A	1.65037e-30	0.508825	1	0.952	3.30073e-27	16-cc 2a I
1957	CG43062	5.88338e-30	0.579086	0.852	0.476	1.17668e-26	16-cc 2a I
1958	Nost	2.0182e-29	0.648682	0.975	0.758	4.03639e-26	16-cc 2a I
1959	Ubi-p5E	2.78383e-29	0.54845	1	0.943	5.56767e-26	16-cc 2a I
1960	Rbp9	4.08678e-29	0.614975	0.902	0.671	8.17357e-26	16-cc 2a I
1961	CG1943	7.13063e-29	0.471649	1	0.998	1.42613e-25	16-cc 2a I
1962	CG44774	1.06952e-28	0.531996	0.992	0.943	2.13903e-25	16-cc 2a I
1963	hdm	6.13783e-27	0.430617	0.844	0.393	1.22757e-23	16-cc 2a I
1964	Swip-1	8.20245e-27	0.507089	0.91	0.626	1.64049e-23	16-cc 2a I
1965	CtBP	3.17966e-26	0.447083	1	0.992	6.35932e-23	16-cc 2a I
1966	Prosbeta2R2	7.86692e-26	0.265741	0.82	0.45	1.57338e-22	16-cc 2a I
1967	CR42862	2.0159e-25	0.546346	0.951	0.756	4.0318e-22	16-cc 2a I
1968	trsn	5.59301e-25	0.530723	1	0.934	1.1186e-21	16-cc 2a I
1969	Pka-C1	6.47341e-25	0.553178	0.967	0.876	1.29468e-21	16-cc 2a I
1970	Mad	7.31049e-25	0.523211	0.984	0.797	1.4621e-21	16-cc 2a I
1971	Parp	8.42772e-25	0.499432	1	0.966	1.68554e-21	16-cc 2a I
1972	mei-P26	1.791e-24	0.556812	0.992	0.963	3.58199e-21	16-cc 2a I
1973	CG43191	2.37998e-24	0.565674	0.869	0.568	4.75996e-21	16-cc 2a I
1974	Bx	3.06883e-24	0.554776	0.902	0.734	6.13766e-21	16-cc 2a I
1975	CG15891	3.62981e-24	0.513094	0.992	0.875	7.25962e-21	16-cc 2a I
1976	CG32486	5.02489e-24	0.610647	0.91	0.801	1.00498e-20	16-cc 2a I
1977	CG10880	3.60299e-23	0.423312	0.959	0.877	7.20597e-20	16-cc 2a I
1978	RpS19b	3.82605e-23	0.552781	1	0.878	7.6521e-20	16-cc 2a I
1979	feo	4.52205e-23	0.449308	0.943	0.869	9.04411e-20	16-cc 2a I
1980	Act5C	8.23125e-23	0.321873	1	1	1.64625e-19	16-cc 2a I
1981	qin	1.09861e-22	0.520547	0.951	0.721	2.19723e-19	16-cc 2a I
1982	CG42260	3.18485e-22	0.387403	0.902	0.545	6.36969e-19	16-cc 2a I
1983	wde	7.10544e-22	0.553322	0.975	0.897	1.42109e-18	16-cc 2a I
1984	CG8490	1.03192e-21	0.419489	0.951	0.815	2.06384e-18	16-cc 2a I
1985	CG4210	1.92776e-21	0.49311	0.967	0.78	3.85552e-18	16-cc 2a I
1986	rhi	2.00161e-21	0.508379	0.943	0.751	4.00323e-18	16-cc 2a I
1987	Nelf-E	2.05696e-21	0.446817	0.918	0.752	4.11391e-18	16-cc 2a I
1988	NaPi-III	3.165e-21	0.468198	0.959	0.82	6.33e-18	16-cc 2a I
1989	Sec61gamma	3.48397e-21	0.306479	1	0.994	6.96793e-18	16-cc 2a I
1990	vret	2.8549e-20	0.456776	0.943	0.729	5.70981e-17	16-cc 2a I
1991	REPTOR-BP	4.83509e-20	0.468322	0.934	0.773	9.67018e-17	16-cc 2a I
1992	Rcd-1r	4.9263e-20	0.297363	0.844	0.529	9.85261e-17	16-cc 2a I
1993	hdc	6.17551e-20	0.495566	0.984	0.929	1.2351e-16	16-cc 2a I
1994	E(spl)m3-HLH	1.16887e-19	0.321562	0.811	0.529	2.33773e-16	16-cc 2a I
1995	endos	4.14627e-19	0.366883	0.992	0.987	8.29254e-16	16-cc 2a I
1996	CG13949	4.65049e-19	0.385121	0.893	0.604	9.30099e-16	16-cc 2a I
1997	spidey	4.83019e-19	0.553628	0.934	0.879	9.66038e-16	16-cc 2a I
[truncated: 3,161 more rows]

## Sheet: Tab 2
Supplemental Table 1 - Markers
Tab 2 - List of marker genes that are transcription factors or co-factors according to GLAD analyses. Table has following columns: gene - marker gene name; p_val - p-value (unadjusted); avg_logFC - log fold-change of the average expression between the cluster and cells from other clusters of the large cluster group (GC, germarium soma, or FC); pct.1 - percentage of cells where the gene is detecte…
	gene	p_val	avg_logFC	pct.1	pct.2	p_val_adj	cluster	FBgn	Sub-group	Sub-sub-group	Confidence	Comments
1476	CG15398	6.47e-22	0.500533	0.914	0.283	1.29e-18	GSC/CB/2-cc	FBgn0031446	DNA-binding with transcription factor activity	NA	NA	NA
1485	chinmo	6.27e-19	0.960441	1	0.717	1.25e-15	GSC/CB/2-cc	FBgn0086758	DNA-binding with transcription factor activity	zf-C2H2	Medium	TFscore=6
1490	Xrp1	8.1e-17	0.341753	1	0.414	1.62e-13	GSC/CB/2-cc	FBgn0261113	DNA-binding with transcription factor activity	AT_hook	Medium	TFscore=6
1507	CG9705	7.66e-14	0.555873	1	0.901	1.53e-10	GSC/CB/2-cc	FBgn0036661	DNA-binding with transcription factor activity	NA	Medium	NA
1508	TfIIA-S	7.77e-14	0.507171	1	0.989	1.55e-10	GSC/CB/2-cc	FBgn0013347	DNA-binding with transcription factor activity	NA	NA	NA
1514	CG7372	2.77e-12	0.554627	1	0.849	5.55e-09	GSC/CB/2-cc	FBgn0036522	DNA-binding with transcription factor activity	zf-C2H2	Medium	TFscore=6
1535	Bgb	1.2e-10	0.454283	1	0.722	2.4e-07	GSC/CB/2-cc	FBgn0013753	Co-factor	CBF-beta	NA	TFscore=NA
1548	mamo	1.37e-09	0.511962	0.943	0.67	2.74e-06	GSC/CB/2-cc	FBgn0267033	DNA-binding with transcription factor activity	zf-C2H2	Medium	TFscore=6
1549	D1	1.51e-09	0.349649	1	0.997	3.02e-06	GSC/CB/2-cc	FBgn0000412	DNA-binding with transcription factor activity	AT_hook	High	TFscore=5
1557	pnt	3.31e-09	0.260936	1	0.684	6.62e-06	GSC/CB/2-cc	FBgn0003118	DNA-binding with transcription factor activity	Ets	High	TFscore=1
1572	HP6	2.63e-08	0.256899	0.857	0.498	5.25e-05	GSC/CB/2-cc	FBgn0031613	DNA-binding with transcription factor activity	NA	NA	NA
1599	CG42232	1.13e-06	0.329111	1	0.76	0.00226139	GSC/CB/2-cc	FBgn0250754	Maybe TF	NA	NA	NA
1612	glu	1.75e-05	0.319075	1	0.835	0.0350046	GSC/CB/2-cc	FBgn0015391	DNA-binding with transcription factor activity	NA	NA	NA
1615	mei-P26	2.3e-05	0.333057	1	0.966	0.0459205	GSC/CB/2-cc	FBgn0026206	Maybe TF	NA	NA	NA
1627	D1	1.65e-69	0.65292	1	0.997	3.3e-66	4-cc	FBgn0000412	DNA-binding with transcription factor activity	AT_hook	High	TFscore=5
1630	CG7372	1.99e-67	0.933361	0.994	0.828	3.98e-64	4-cc	FBgn0036522	DNA-binding with transcription factor activity	zf-C2H2	Medium	TFscore=6
1634	HmgD	8.75e-64	0.86156	1	1	1.75e-60	4-cc	FBgn0004362	DNA-binding with transcription factor activity	HMG_box	Medium	TFscore=6
1636	E(spl)mgamma-HLH	2.09e-63	0.705523	0.869	0.366	4.17e-60	4-cc	FBgn0002735	DNA-binding with transcription factor activity	HLH	High	TFscore=2
1638	E(spl)m8-HLH	1.11e-60	1.28969	0.929	0.324	2.21e-57	4-cc	FBgn0000591	DNA-binding with transcription factor activity	HLH	High	TFscore=5
1643	TfIIA-S	6.19e-55	0.560076	1	0.988	1.24e-51	4-cc	FBgn0013347	DNA-binding with transcription factor activity	NA	NA	NA
1655	E(spl)m7-HLH	3.45e-45	1.69185	0.917	0.657	6.89e-42	4-cc	FBgn0002633	DNA-binding with transcription factor activity	HLH	High	TFscore=3
1656	CtBP	4.7e-45	0.523707	1	0.992	9.4e-42	4-cc	FBgn0020496	Co-factor	NA	NA	NA
1668	HmgZ	9.06e-41	0.728056	0.929	0.664	1.81e-37	4-cc	FBgn0010228	DNA-binding with transcription factor activity	HMG_box	Medium	TFscore=6
1670	E(spl)mbeta-HLH	3.2e-40	0.52001	0.917	0.566	6.4e-37	4-cc	FBgn0002733	DNA-binding with transcription factor activity	HLH	Medium	TFscore=6
1672	mei-P26	1.39e-39	0.57281	1	0.96	2.78e-36	4-cc	FBgn0026206	Maybe TF	NA	NA	NA
1679	CG9705	6.82e-37	0.506576	0.976	0.89	1.36e-33	4-cc	FBgn0036661	DNA-binding with transcription factor activity	NA	Medium	NA
1691	glu	2.03e-31	0.460116	0.976	0.814	4.06e-28	4-cc	FBgn0015391	DNA-binding with transcription factor activity	NA	NA	NA
1693	chinmo	3.81e-31	0.523631	0.952	0.683	7.63e-28	4-cc	FBgn0086758	DNA-binding with transcription factor activity	zf-C2H2	Medium	TFscore=6
1694	HP6	7.31e-31	0.402443	0.78	0.459	1.46e-27	4-cc	FBgn0031613	DNA-binding with transcription factor activity	NA	NA	NA
1697	CG42232	1.89e-30	0.500147	0.946	0.734	3.78e-27	4-cc	FBgn0250754	Maybe TF	NA	NA	NA
1699	jumu	2.64e-30	0.432658	0.917	0.698	5.27e-27	4-cc	FBgn0015396	DNA-binding with transcription factor activity	Fork_head	Medium	TFscore=6
1704	Bgb	6.4e-29	0.385117	0.952	0.69	1.28e-25	4-cc	FBgn0013753	Co-factor	CBF-beta	NA	TFscore=NA
1716	Pcl	3.36e-27	0.384167	0.964	0.856	6.72e-24	4-cc	FBgn0003044	DNA-binding with transcription factor activity	NA	NA	NA
1743	Cenp-C	1.46e-21	0.390922	0.875	0.732	2.92e-18	4-cc	FBgn0266916	DNA-binding with transcription factor activity	AT_hook	NA	TFscore=NA
1751	CG45050	5.22e-20	0.325785	0.994	0.94	1.04e-16	4-cc	FBgn0266410	DNA-binding with transcription factor activity	NA	Medium	NA
1759	mxc	2.61e-18	0.284824	0.893	0.613	5.22e-15	4-cc	FBgn0260789	DNA-binding with transcription factor activity	AT_hook	Medium	TFscore=6
1774	hrg	1.3e-16	0.333664	0.982	0.865	2.6e-13	4-cc	FBgn0015949	Maybe TF	NA	NA	NA
1786	egg	2.6e-14	0.264584	0.911	0.803	5.2e-11	4-cc	FBgn0086908	DNA-binding with transcription factor activity	NA	Medium	NA
1802	HmgD	3.8e-46	0.893399	1	1	7.6e-43	8-cc	FBgn0004362	DNA-binding with transcription factor activity	HMG_box	Medium	TFscore=6
1809	mamo	8.09e-31	0.71968	0.96	0.649	1.62e-27	8-cc	FBgn0267033	DNA-binding with transcription factor activity	zf-C2H2	Medium	TFscore=6
1813	Ssb-c31a	1.12e-27	0.480779	1	0.995	2.24e-24	8-cc	FBgn0015299	DNA-binding with transcription factor activity	NA	High	NA
1834	mei-P26	4.5e-19	0.483709	1	0.963	9e-16	8-cc	FBgn0026206	Maybe TF	NA	NA	NA
1836	CtBP	6.62e-19	0.393705	1	0.993	1.32e-15	8-cc	FBgn0020496	Co-factor	NA	NA	NA
1841	egg	3.01e-18	0.461334	0.96	0.805	6.02e-15	8-cc	FBgn0086908	DNA-binding with transcription factor activity	NA	Medium	NA
1859	E(spl)m7-HLH	3e-15	0.668575	0.842	0.683	6.01e-12	8-cc	FBgn0002633	DNA-binding with transcription factor activity	HLH	High	TFscore=3
1873	HmgZ	3.62e-13	0.426627	0.861	0.689	7.24e-10	8-cc	FBgn0010228	DNA-binding with transcription factor activity	HMG_box	Medium	TFscore=6
1875	CG6701	5.21e-13	0.438049	0.921	0.84	1.04e-09	8-cc	FBgn0033889	DNA-binding with transcription factor activity	NA	Medium	NA
1882	CG14438	3.06e-12	0.350357	0.97	0.787	6.12e-09	8-cc	FBgn0029899	DNA-binding with transcription factor activity	NA	Medium	NA
1891	E(spl)m8-HLH	1.23e-11	0.524096	0.752	0.385	2.46e-08	8-cc	FBgn0000591	DNA-binding with transcription factor activity	HLH	High	TFscore=5
1892	Dsp1	1.57e-11	0.293222	1	0.975	3.13e-08	8-cc	FBgn0278608	DNA-binding with transcription factor activity	HMG_box	High	TFscore=5
1897	hrg	5.57e-11	0.36548	0.95	0.877	1.11e-07	8-cc	FBgn0015949	Maybe TF	NA	NA	NA
1900	Pur-alpha	6.87e-11	0.356899	0.871	0.693	1.37e-07	8-cc	FBgn0022361	DNA-binding with transcription factor activity	NA	High	NA
1902	bun	9.94e-11	0.308592	0.97	0.906	1.99e-07	8-cc	FBgn0259176	DNA-binding with transcription factor activity	TSC22	NA	TFscore=NA
1904	TfIIA-S	1.45e-10	0.260718	1	0.988	2.89e-07	8-cc	FBgn0013347	DNA-binding with transcription factor activity	NA	NA	NA
1910	psq	6.18e-10	0.279786	0.99	0.958	1.24e-06	8-cc	FBgn0263102	DNA-binding with transcription factor activity	HTH_psq	NA	TFscore=5
1932	Adf1	1.32e-06	0.254493	0.901	0.74	0.00264873	8-cc	FBgn0000054	DNA-binding with transcription factor activity	BESS|MADF	High	TFscore=1
1937	CG4570	5.44e-05	0.258176	0.941	0.853	0.108751	8-cc	FBgn0037844	DNA-binding with transcription factor activity	NA	Medium	NA
1938	Dsp1	4.76e-48	0.800057	1	0.974	9.53e-45	16-cc 2a I	FBgn0278608	DNA-binding with transcription factor activity	HMG_box	High	TFscore=5
1940	ovo	4.43e-46	0.809937	1	0.932	8.86e-43	16-cc 2a I	FBgn0003028	DNA-binding with transcription factor activity	zf-C2H2	High	TFscore=1
1943	Ssb-c31a	2.89e-37	0.509677	1	0.995	5.78e-34	16-cc 2a I	FBgn0015299	DNA-binding with transcription factor activity	NA	High	NA
1949	bun	1.3e-32	0.661554	0.992	0.902	2.59e-29	16-cc 2a I	FBgn0259176	DNA-binding with transcription factor activity	TSC22	NA	TFscore=NA
1965	CtBP	3.18e-26	0.447083	1	0.992	6.36e-23	16-cc 2a I	FBgn0020496	Co-factor	NA	NA	NA
1970	Mad	7.31e-25	0.523211	0.984	0.797	1.46e-21	16-cc 2a I	FBgn0011648	DNA-binding with transcription factor activity	MH1	High	TFscore=1
1971	Parp	8.43e-25	0.499432	1	0.966	1.69e-21	16-cc 2a I	FBgn0010247	DNA-binding with transcription factor activity	NA	NA	NA
1972	mei-P26	1.79e-24	0.556812	0.992	0.963	3.58e-21	16-cc 2a I	FBgn0026206	Maybe TF	NA	NA	NA
1974	Bx	3.07e-24	0.554776	0.902	0.734	6.14e-21	16-cc 2a I	FBgn0265598	Maybe TF	NA	NA	NA
1987	Nelf-E	2.06e-21	0.446817	0.918	0.752	4.11e-18	16-cc 2a I	FBgn0017430	Maybe TF	NA	NA	NA
1994	E(spl)m3-HLH	1.17e-19	0.321562	0.811	0.529	2.34e-16	16-cc 2a I	FBgn0002609	DNA-binding with transcription factor activity	HLH	High	TFscore=5
2018	egg	1.16e-15	0.380278	0.943	0.804	2.33e-12	16-cc 2a I	FBgn0086908	DNA-binding with transcription factor activity	NA	Medium	NA
2021	sbb	3.62e-15	0.334439	1	0.928	7.24e-12	16-cc 2a I	FBgn0010575	DNA-binding with transcription factor activity	NA	Medium	NA
2032	psq	4.57e-14	0.33417	1	0.956	9.14e-11	16-cc 2a I	FBgn0263102	DNA-binding with transcription factor activity	HTH_psq	NA	TFscore=5
2034	Usf	6.86e-14	0.340267	0.893	0.778	1.37e-10	16-cc 2a I	FBgn0029711	DNA-binding with transcription factor activity	HLH	High	TFscore=5
2035	CG3726	7.58e-14	0.341408	0.836	0.637	1.52e-10	16-cc 2a I	FBgn0029824	DNA-binding with transcription factor activity	AT_hook|HTH_psq_like	Medium	TFscore=6
2045	Trf2	2.38e-12	0.327468	0.992	0.962	4.77e-09	16-cc 2a I	FBgn0261793	DNA-binding with transcription factor activity	NA	NA	NA
2052	Pur-alpha	9.48e-12	0.295833	0.885	0.687	1.9e-08	16-cc 2a I	FBgn0022361	DNA-binding with transcription factor activity	NA	High	NA
2066	chn	1.52e-10	0.282175	0.926	0.775	3.04e-07	16-cc 2a I	FBgn0015371	DNA-binding with transcription factor activity	zf-C2H2	High	TFscore=1
2071	CG14438	4.21e-10	0.275294	0.869	0.797	8.41e-07	16-cc 2a I	FBgn0029899	DNA-binding with transcription factor activity	NA	Medium	NA
2103	Hr4	1.67e-07	0.262312	0.754	0.541	0.000334619	16-cc 2a I	FBgn0264562	DNA-binding with transcription factor activity	zf-C4	Medium	TFscore=6
2105	Mnt	6.04e-07	0.262935	0.893	0.798	0.00120863	16-cc 2a I	FBgn0023215	DNA-binding with transcription factor activity	HLH	Medium	TFscore=6
2117	ovo	3.33e-41	0.792339	1	0.933	6.66e-38	16-cc 2a II	FBgn0003028	DNA-binding with transcription factor activity	zf-C2H2	High	TFscore=1
2119	Unr	2.36e-36	0.652638	1	0.987	4.71e-33	16-cc 2a II	FBgn0263352	DNA-binding with transcription factor activity	NA	NA	NA
2120	Dsp1	1.09e-35	0.719005	1	0.975	2.18e-32	16-cc 2a II	FBgn0278608	DNA-binding with transcription factor activity	HMG_box	High	TFscore=5
2121	Mad	1.79e-35	0.688348	0.991	0.799	3.58e-32	16-cc 2a II	FBgn0011648	DNA-binding with transcription factor activity	MH1	High	TFscore=1
2127	bun	1.69e-33	0.702561	1	0.903	3.38e-30	16-cc 2a II	FBgn0259176	DNA-binding with transcription factor activity	TSC22	NA	TFscore=NA
2144	CG32264	1.33e-28	0.625548	0.972	0.857	2.66e-25	16-cc 2a II	FBgn0052264	Maybe TF	RPEL	NA	TFscore=NA
2150	CG14441	1.1e-26	0.531667	0.953	0.769	2.19e-23	16-cc 2a II	FBgn0029895	DNA-binding with transcription factor activity	zf-C2H2	Medium	TFscore=6
2160	Gsc	9.23e-25	0.35222	0.841	0.405	1.85e-21	16-cc 2a II	FBgn0010323	DNA-binding with transcription factor activity	Homeobox	High	TFscore=1
2161	Trf2	1.18e-24	0.501384	1	0.962	2.37e-21	16-cc 2a II	FBgn0261793	DNA-binding with transcription factor activity	NA	NA	NA
2165	Xrp1	3.01e-24	0.331265	0.813	0.391	6.02e-21	16-cc 2a II	FBgn0261113	DNA-binding with transcription factor activity	AT_hook	Medium	TFscore=6
2170	CG45050	1.84e-22	0.481927	0.991	0.944	3.68e-19	16-cc 2a II	FBgn0266410	DNA-binding with transcription factor activity	NA	Medium	NA
2181	sbb	1.03e-20	0.429169	1	0.929	2.06e-17	16-cc 2a II	FBgn0010575	DNA-binding with transcription factor activity	NA	Medium	NA
2197	Parp	4.42e-18	0.443597	0.991	0.967	8.85e-15	16-cc 2a II	FBgn0010247	DNA-binding with transcription factor activity	NA	NA	NA
2203	tsh	5.25e-17	0.349391	0.841	0.686	1.05e-13	16-cc 2a II	FBgn0003866	DNA-binding with transcription factor activity	zf-C2H2	High	TFscore=1
2213	aop	7.06e-16	0.391143	0.925	0.867	1.41e-12	16-cc 2a II	FBgn0000097	DNA-binding with transcription factor activity	Ets	High	TFscore=2
2214	Psc	7.32e-16	0.367692	0.972	0.847	1.46e-12	16-cc 2a II	FBgn0005624	DNA-binding with transcription factor activity	NA	NA	NA
2218	mxc	1.47e-15	0.311345	0.925	0.627	2.94e-12	16-cc 2a II	FBgn0260789	DNA-binding with transcription factor activity	AT_hook	Medium	TFscore=6
2222	CG2678	2.5e-15	0.436402	0.888	0.739	5e-12	16-cc 2a II	FBgn0014931	DNA-binding with transcription factor activity	zf-C2H2	Medium	TFscore=6
2229	Nelf-E	6.3e-15	0.412144	0.888	0.758	1.26e-11	16-cc 2a II	FBgn0017430	Maybe TF	NA	NA	NA
2230	jim	6.63e-15	0.444943	0.832	0.692	1.33e-11	16-cc 2a II	FBgn0027339	DNA-binding with transcription factor activity	zf-C2H2	Medium	TFscore=6
2264	hrg	3.07e-12	0.318284	0.953	0.876	6.13e-09	16-cc 2a II	FBgn0015949	Maybe TF	NA	NA	NA
2273	ftz-f1	1.41e-11	0.269237	0.907	0.764	2.81e-08	16-cc 2a II	FBgn0001078	DNA-binding with transcription factor activity	zf-C4	High	TFscore=1
2284	psq	5.96e-11	0.28634	1	0.957	1.19e-07	16-cc 2a II	FBgn0263102	DNA-binding with transcription factor activity	HTH_psq	NA	TFscore=5
2287	CG32767	1.2e-10	0.283668	0.972	0.901	2.4e-07	16-cc 2a II	FBgn0052767	DNA-binding with transcription factor activity	zf-C2H2	Medium	TFscore=6
2289	ttk	2.34e-10	0.312989	0.925	0.838	4.69e-07	16-cc 2a II	FBgn0003870	DNA-binding with transcription factor activity	zf-C2H2	High	TFscore=1
2291	CG14438	3.03e-10	0.297378	0.925	0.791	6.06e-07	16-cc 2a II	FBgn0029899	DNA-binding with transcription factor activity	NA	Medium	NA
2298	chn	1.29e-09	0.295791	0.916	0.779	2.58e-06	16-cc 2a II	FBgn0015371	DNA-binding with transcription factor activity	zf-C2H2	High	TFscore=1
2300	dl	2.08e-09	0.299521	0.72	0.525	4.17e-06	16-cc 2a II	FBgn0260632	DNA-binding with transcription factor activity	RHD|TIG	High	TFscore=1
2317	CG9650	2.25e-08	0.294147	0.71	0.572	4.5e-05	16-cc 2a II	FBgn0029939	DNA-binding with transcription factor activity	zf-C2H2	Medium	TFscore=6
2318	l(3)mbt	2.33e-08	0.258721	0.879	0.712	4.66e-05	16-cc 2a II	FBgn0002441	DNA-binding with transcription factor activity	NA	Medium	NA
2328	egg	6.48e-07	0.264315	0.916	0.809	0.00129531	16-cc 2a II	FBgn0086908	DNA-binding with transcription factor activity	NA	Medium	NA
2333	Unr	4.26e-34	0.724881	1	0.988	8.53e-31	16-cc 2ab	FBgn0263352	DNA-binding with transcription factor activity	NA	NA	NA
2387	jigr1	2.16e-15	0.40562	0.989	0.904	4.33e-12	16-cc 2ab	FBgn0039350	Maybe TF	MADF	NA	TFscore=NA
2390	tna	7.83e-15	0.264161	0.685	0.352	1.57e-11	16-cc 2ab	FBgn0026160	DNA-binding with transcription factor activity	zf-MIZ	Medium	TFscore=6
2395	chn	2.98e-14	0.382117	0.933	0.78	5.96e-11	16-cc 2ab	FBgn0015371	DNA-binding with transcription factor activity	zf-C2H2	High	TFscore=1
2414	Hnf4	4.96e-12	0.349038	0.91	0.681	9.93e-09	16-cc 2ab	FBgn0004914	DNA-binding with transcription factor activity	zf-C4	High	TFscore=5
2416	Mnt	8.77e-12	0.36477	0.921	0.798	1.75e-08	16-cc 2ab	FBgn0023215	DNA-binding with transcription factor activity	HLH	Medium	TFscore=6
2428	sbb	7.79e-11	0.308004	0.989	0.931	1.56e-07	16-cc 2ab	FBgn0010575	DNA-binding with transcription factor activity	NA	Medium	NA
2439	Dsp1	7.56e-10	0.260577	1	0.975	1.51e-06	16-cc 2ab	FBgn0278608	DNA-binding with transcription factor activity	HMG_box	High	TFscore=5
2441	CG45071	1.28e-09	0.27225	0.831	0.675	2.57e-06	16-cc 2ab	FBgn0266441	DNA-binding with transcription factor activity	NA	NA	NA
2455	CG14441	7.21e-09	0.321132	0.809	0.786	1.44e-05	16-cc 2ab	FBgn0029895	DNA-binding with transcription factor activity	zf-C2H2	Medium	TFscore=6
2471	CG30403	4.12e-07	0.267272	0.91	0.758	0.000824042	16-cc 2ab	FBgn0050403	DNA-binding with transcription factor activity	BESS	Medium	TFscore=6
2504	kay	4.07e-22	0.293741	0.753	0.519	8.13e-19	16-cc 2b	FBgn0001297	DNA-binding with transcription factor activity	bZIP	High	TFscore=1
2515	retn	3.69e-20	0.288719	0.808	0.623	7.38e-17	16-cc 2b	FBgn0004795	DNA-binding with transcription factor activity	ARID	High	TFscore=5
2526	CG45071	1.57e-16	0.295751	0.822	0.666	3.14e-13	16-cc 2b	FBgn0266441	DNA-binding with transcription factor activity	NA	NA	NA
2556	skd	2.94e-11	0.26441	0.979	0.931	5.88e-08	16-cc 2b	FBgn0003415	Co-factor	NA	NA	NA
2560	Hnf4	1.07e-10	0.270229	0.788	0.686	2.14e-07	16-cc 2b	FBgn0004914	DNA-binding with transcription factor activity	zf-C4	High	TFscore=5
2565	CG4570	4.12e-09	0.286273	0.932	0.85	8.24e-06	16-cc 2b	FBgn0037844	DNA-binding with transcription factor activity	NA	Medium	NA
2614	fs(1)Ya	5.98e-23	0.257376	0.914	0.518	1.2e-19	16-cc 3	FBgn0000927	DNA-binding with transcription factor activity	NA	Medium	NA
2671	CG4570	2.14e-10	0.254375	0.957	0.849	4.27e-07	16-cc 3	FBgn0037844	DNA-binding with transcription factor activity	NA	Medium	NA
2674	mod	5.17e-86	1.02726	1	0.99	1.03e-82	St2	FBgn0002780	DNA-binding with transcription factor activity	NA	High	NA
2685	La	2.11e-63	0.843995	0.994	0.898	4.23e-60	St2	FBgn0011638	DNA-binding with transcription factor activity	NA	NA	NA
2718	fs(1)Ya	1.45e-38	0.708216	0.862	0.505	2.9e-35	St2	FBgn0000927	DNA-binding with transcription factor activity	NA	Medium	NA
2809	gcl	3.01e-11	0.293866	0.862	0.779	6.01e-08	St2	FBgn0005695	Maybe TF	NA	NA	NA
2819	cad	2.64e-09	0.297208	0.599	0.516	5.29e-06	St2	FBgn0000251	DNA-binding with transcription factor activity	Homeobox	High	TFscore=1
2829	CG4404	5.54e-07	0.343394	0.832	0.846	0.00110805	St2	FBgn0030432	DNA-binding with transcription factor activity	BESS	Medium	TFscore=6
2843	en	1.87e-10	1.10872	1	0.335	3.73e-07	TF/CC	FBgn0000577	DNA-binding with transcription factor activity	Homeobox	High	TFscore=1
2863	tna	3.16e-07	1.55196	1	0.877	0.000631234	TF/CC	FBgn0026160	DNA-binding with transcription factor activity	zf-MIZ	Medium	TFscore=6
2878	Snoo	1.87e-06	1.17637	1	0.781	0.00374952	TF/CC	FBgn0085450	Maybe TF	Ski_Sno	NA	TFscore=NA
2886	Glut4EF	3.47e-06	1.02336	1	0.89	0.00693798	TF/CC	FBgn0267336	DNA-binding with transcription factor activity	C-CLIP|zf-C2H2	NA	TFscore=NA
2898	tim	1.02e-05	0.631393	1	0.57	0.0203915	TF/CC	FBgn0014396	Maybe TF	NA	NA	NA
2904	bab2	1.77e-05	0.965833	1	0.744	0.0353456	TF/CC	FBgn0025525	DNA-binding with transcription factor activity	HTH_psq	High	TFscore=5
2942	mirr	0.000147426	1.11873	1	0.899	0.294851	TF/CC	FBgn0014343	DNA-binding with transcription factor activity	Homeobox	High	TFscore=1
2960	bowl	0.000396304	0.773944	0.9	0.732	0.792607	TF/CC	FBgn0004893	DNA-binding with transcription factor activity	zf-C2H2	Medium	TFscore=6
2968	tsh	0.000472913	0.660931	0.9	0.791	0.945826	TF/CC	FBgn0003866	DNA-binding with transcription factor activity	zf-C2H2	High	TFscore=1
2969	Usf	0.000484336	0.57465	1	0.665	0.968673	TF/CC	FBgn0029711	DNA-binding with transcription factor activity	HLH	High	TFscore=5
2973	tj	0.000613297	0.617582	1	0.88	1	TF/CC	FBgn0000964	DNA-binding with transcription factor activity	bZIP_Maf	Medium	TFscore=6
2974	bab1	0.000614001	0.594429	0.9	0.524	1	TF/CC	FBgn0004870	DNA-binding with transcription factor activity	HTH_psq	High	TFscore=5
2981	kay	0.000780188	1.15638	1	0.775	1	TF/CC	FBgn0001297	DNA-binding with transcription factor activity	bZIP	High	TFscore=1
2988	croc	0.000937236	0.450024	0.8	0.249	1	TF/CC	FBgn0014143	DNA-binding with transcription factor activity	Fork_head	High	TFscore=5
3005	Bx	0.00147822	0.356657	1	0.601	1	TF/CC	FBgn0265598	Maybe TF	NA	NA	NA
3012	bun	0.00163591	0.466544	1	0.978	1	TF/CC	FBgn0259176	DNA-binding with transcription factor activity	TSC22	NA	TFscore=NA
3030	peb	0.00319351	0.519178	1	0.681	1	TF/CC	FBgn0003053	DNA-binding with transcription factor activity	zf-C2H2	Medium	TFscore=6
3036	Atf3	0.0034654	0.569174	0.9	0.679	1	TF/CC	FBgn0028550	DNA-binding with transcription factor activity	bZIP	Medium	TFscore=6
3042	Su(z)2	0.00405829	0.297325	0.9	0.642	1	TF/CC	FBgn0265623	DNA-binding with transcription factor activity	NA	NA	NA
3053	Lmpt	0.00584365	0.488495	0.9	0.818	1	TF/CC	FBgn0261565	DNA-binding with transcription factor activity	NA	NA	NA
3060	CG31955	0.00699297	0.360867	0.9	0.617	1	TF/CC	FBgn0051955	Maybe TF	NA	NA	NA
3069	CG9932	0.00821908	0.64117	1	0.939	1	TF/CC	FBgn0262160	DNA-binding with transcription factor activity	zf-C2H2	NA	TFscore=6
3073	CG15365	0.00937392	0.366481	1	0.727	1	TF/CC	FBgn0030077	DNA-binding with transcription factor activity	NA	Medium	NA
3086	emc	1.16e-26	0.854927	0.955	0.878	2.32e-23	aEC	FBgn0000575	DNA-binding with transcription factor activity	HLH	High	TFscore=3
3098	ovo	9.83e-22	0.37914	0.812	0.557	1.97e-18	aEC	FBgn0003028	DNA-binding with transcription factor activity	zf-C2H2	High	TFscore=1
3102	Bx	2.44e-20	0.475298	0.866	0.552	4.88e-17	aEC	FBgn0265598	Maybe TF	NA	NA	NA
3114	mirr	9.17e-18	0.530411	0.982	0.884	1.83e-14	aEC	FBgn0014343	DNA-binding with transcription factor activity	Homeobox	High	TFscore=1
3116	ea	4.09e-17	0.340721	0.714	0.406	8.17e-14	aEC	FBgn0000533	Maybe TF	NA	NA	NA
3124	E(spl)m3-HLH	3.77e-16	0.508109	1	0.954	7.54e-13	aEC	FBgn0002609	DNA-binding with transcription factor activity	HLH	High	TFscore=5
3126	tj	9.48e-16	0.509959	0.982	0.861	1.9e-12	aEC	FBgn0000964	DNA-binding with transcription factor activity	bZIP_Maf	Medium	TFscore=6
3128	Dsp1	1.76e-15	0.47457	0.946	0.941	3.52e-12	aEC	FBgn0278608	DNA-binding with transcription factor activity	HMG_box	High	TFscore=5
3146	Coop	2.35e-13	0.317505	0.946	0.729	4.7e-10	aEC	FBgn0263240	DNA-binding with transcription factor activity	BESS	NA	TFscore=6
3151	E(spl)mbeta-HLH	2.05e-12	0.470032	1	0.975	4.11e-09	aEC	FBgn0002733	DNA-binding with transcription factor activity	HLH	Medium	TFscore=6
3164	Dad	3.63e-11	0.28999	0.821	0.658	7.26e-08	aEC	FBgn0020493	DNA-binding with transcription factor activity	NA	Medium	NA
3182	kay	1.9e-09	0.30545	0.866	0.76	3.8e-06	aEC	FBgn0001297	DNA-binding with transcription factor activity	bZIP	High	TFscore=1
3183	jigr1	2.09e-09	0.363386	0.929	0.802	4.18e-06	aEC	FBgn0039350	Maybe TF	MADF	NA	TFscore=NA
3188	bun	5.1e-09	0.299465	1	0.973	1.02e-05	aEC	FBgn0259176	DNA-binding with transcription factor activity	TSC22	NA	TFscore=NA
3189	Ssb-c31a	5.42e-09	0.406782	0.973	0.941	1.08e-05	aEC	FBgn0015299	DNA-binding with transcription factor activity	NA	High	NA
3202	bowl	3.4e-08	0.305083	0.839	0.712	6.8e-05	aEC	FBgn0004893	DNA-binding with transcription factor activity	zf-C2H2	Medium	TFscore=6
3203	CG6701	3.85e-08	0.292691	0.875	0.767	7.71e-05	aEC	FBgn0033889	DNA-binding with transcription factor activity	NA	Medium	NA
3231	tsh	1.49e-05	0.286538	0.884	0.773	0.0297903	aEC	FBgn0003866	DNA-binding with transcription factor activity	zf-C2H2	High	TFscore=1
3232	mei-P26	0.00149761	0.27248	0.946	0.876	1	aEC	FBgn0026206	Maybe TF	NA	NA	NA
3244	Eip93F	7.86e-45	0.968159	1	0.902	1.57e-41	cEC	FBgn0264490	DNA-binding with transcription factor activity	HTH_psq	Medium	TFscore=6
3268	ab	2.65e-32	0.746629	0.956	0.629	5.3e-29	cEC	FBgn0264442	DNA-binding with transcription factor activity	zf-C2H2	Medium	TFscore=6
3283	mirr	9.74e-28	0.714604	1	0.88	1.95e-24	cEC	FBgn0014343	DNA-binding with transcription factor activity	Homeobox	High	TFscore=1
3289	E(spl)m3-HLH	8.07e-26	0.65908	1	0.954	1.61e-22	cEC	FBgn0002609	DNA-binding with transcription factor activity	HLH	High	TFscore=5
3294	sbb	1e-24	0.502048	1	0.967	2.01e-21	cEC	FBgn0010575	DNA-binding with transcription factor activity	NA	Medium	NA
3301	CG5953	5.22e-23	0.675595	0.938	0.728	1.04e-19	cEC	FBgn0032587	DNA-binding with transcription factor activity	MADF	Medium	TFscore=6
3302	Six4	6.36e-23	0.632733	0.991	0.904	1.27e-19	cEC	FBgn0027364	DNA-binding with transcription factor activity	Homeobox	High	TFscore=5
3332	E(spl)mbeta-HLH	1.86e-18	0.568976	0.982	0.979	3.73e-15	cEC	FBgn0002733	DNA-binding with transcription factor activity	HLH	Medium	TFscore=6
3345	CG4404	2.52e-16	0.426683	0.973	0.931	5.03e-13	cEC	FBgn0030432	DNA-binding with transcription factor activity	BESS	Medium	TFscore=6
3368	Eip75B	2.02e-14	0.37142	1	0.992	4.03e-11	cEC	FBgn0000568	DNA-binding with transcription factor activity	zf-C4	Medium	TFscore=6
3377	CG15365	1.3e-13	0.409149	0.867	0.702	2.6e-10	cEC	FBgn0030077	DNA-binding with transcription factor activity	NA	Medium	NA
3397	Glut4EF	4.89e-12	0.395814	0.912	0.887	9.79e-09	cEC	FBgn0267336	DNA-binding with transcription factor activity	C-CLIP|zf-C2H2	NA	TFscore=NA
3402	CG45050	2.16e-11	0.31336	0.965	0.906	4.31e-08	cEC	FBgn0266410	DNA-binding with transcription factor activity	NA	Medium	NA
3406	CG14441	6.09e-11	0.391054	0.858	0.694	1.22e-07	cEC	FBgn0029895	DNA-binding with transcription factor activity	zf-C2H2	Medium	TFscore=6
3424	mei-P26	7.46e-10	0.343009	0.947	0.876	1.49e-06	cEC	FBgn0026206	Maybe TF	NA	NA	NA
3429	CG3838	2.09e-09	0.396185	0.92	0.828	4.18e-06	cEC	FBgn0032130	DNA-binding with transcription factor activity	BESS	Medium	TFscore=6
3431	jigr1	2.63e-09	0.300108	0.867	0.815	5.26e-06	cEC	FBgn0039350	Maybe TF	MADF	NA	TFscore=NA
3450	Xrp1	1.02e-08	0.290674	0.973	0.979	2.04e-05	cEC	FBgn0261113	DNA-binding with transcription factor activity	AT_hook	Medium	TFscore=6
3465	Psc	7.37e-08	0.319145	0.965	0.881	0.00014731	cEC	FBgn0005624	DNA-binding with transcription factor activity	NA	NA	NA
3470	Hnf4	4.55e-07	0.279596	0.761	0.656	0.000909388	cEC	FBgn0004914	DNA-binding with transcription factor activity	zf-C4	High	TFscore=5
3481	Mnt	4.63e-06	0.281709	0.841	0.771	0.00925812	cEC	FBgn0023215	DNA-binding with transcription factor activity	HLH	Medium	TFscore=6
3487	tsh	1.86e-05	0.366226	0.894	0.771	0.0372169	cEC	FBgn0003866	DNA-binding with transcription factor activity	zf-C2H2	High	TFscore=1
3500	luna	0.000407953	0.285245	0.637	0.547	0.815907	cEC	FBgn0040765	DNA-binding with transcription factor activity	zf-C2H2	Medium	TFscore=6
3507	mod	1.01e-23	0.508804	1	0.978	2.01e-20	pEC	FBgn0002780	DNA-binding with transcription factor activity	NA	High	NA
3522	Six4	3.56e-14	0.417464	0.989	0.908	7.13e-11	pEC	FBgn0027364	DNA-binding with transcription factor activity	Homeobox	High	TFscore=5
3524	peb	7.4e-13	0.569879	0.8	0.665	1.48e-09	pEC	FBgn0003053	DNA-binding with transcription factor activity	zf-C2H2	Medium	TFscore=6
3529	br	2.44e-12	0.441538	0.779	0.68	4.89e-09	pEC	FBgn0000210	DNA-binding with transcription factor activity	zf-C2H2	High	TFscore=1
3536	La	1.39e-10	0.324835	0.979	0.95	2.77e-07	pEC	FBgn0011638	DNA-binding with transcription factor activity	NA	NA	NA
3541	klu	9.96e-10	0.30405	0.768	0.575	1.99e-06	pEC	FBgn0013469	DNA-binding with transcription factor activity	zf-C2H2	Medium	TFscore=6
3547	CG1620	2.01e-08	0.46034	0.958	0.896	4.01e-05	pEC	FBgn0033183	DNA-binding with transcription factor activity	Myb_DNA-binding	Medium	TFscore=6
3548	HmgZ	4.02e-08	0.263725	1	0.996	8.04e-05	pEC	FBgn0010228	DNA-binding with transcription factor activity	HMG_box	Medium	TFscore=6
3560	HmgD	1.01e-24	0.443772	1	0.996	2.03e-21	FSC/pre-FC	FBgn0004362	DNA-binding with transcription factor activity	HMG_box	Medium	TFscore=6
3566	D1	1.7e-19	0.307388	1	1	3.4e-16	FSC/pre-FC	FBgn0000412	DNA-binding with transcription factor activity	AT_hook	High	TFscore=5
3573	so	2.34e-15	0.268852	0.844	0.623	4.67e-12	FSC/pre-FC	FBgn0003460	DNA-binding with transcription factor activity	Homeobox	High	TFscore=1
3577	eya	1.85e-14	0.326249	0.889	0.786	3.69e-11	FSC/pre-FC	FBgn0000320	Maybe TF	NA	NA	NA
3578	rgr	3.23e-14	0.34222	0.941	0.826	6.46e-11	FSC/pre-FC	FBgn0267792	DNA-binding with transcription factor activity	zf-C2H2	Medium	TFscore=6
3599	mamo	6.27e-21	0.771293	1	1	1.25e-17	pre-stalk	FBgn0267033	DNA-binding with transcription factor activity	zf-C2H2	Medium	TFscore=6
3609	aop	7.79e-17	0.614655	1	0.988	1.56e-13	pre-stalk	FBgn0000097	DNA-binding with transcription factor activity	Ets	High	TFscore=2
3611	rgr	2.72e-16	0.641139	1	0.837	5.45e-13	pre-stalk	FBgn0267792	DNA-binding with transcription factor activity	zf-C2H2	Medium	TFscore=6
3618	cas	1.34e-13	0.455701	0.943	0.575	2.68e-10	pre-stalk	FBgn0004878	DNA-binding with transcription factor activity	AT_hook|zf-C2H2	High	TFscore=2
3632	dl	9.45e-11	0.440823	0.906	0.643	1.89e-07	pre-stalk	FBgn0260632	DNA-binding with transcription factor activity	RHD|TIG	High	TFscore=1
3643	fru	4.12e-09	0.387543	0.981	0.878	8.23e-06	pre-stalk	FBgn0004652	DNA-binding with transcription factor activity	zf-C2H2	Medium	TFscore=6
3649	ct	1.95e-08	0.251894	0.981	0.847	3.91e-05	pre-stalk	FBgn0004198	DNA-binding with transcription factor activity	CUT|Homeobox	High	TFscore=1
3652	sim	2.92e-08	0.301527	0.717	0.369	5.84e-05	pre-stalk	FBgn0004666	DNA-binding with transcription factor activity	HLH	High	TFscore=2
3673	sr	1.74e-05	0.333285	0.755	0.491	0.0348998	pre-stalk	FBgn0003499	DNA-binding with transcription factor activity	zf-C2H2	Medium	TFscore=6
3675	CG9932	1.95e-05	0.309294	1	0.935	0.0390274	pre-stalk	FBgn0262160	DNA-binding with transcription factor activity	zf-C2H2	NA	TFscore=6
3677	apt	4.42e-05	0.265541	0.962	0.794	0.0883372	pre-stalk	FBgn0015903	DNA-binding with transcription factor activity	SANT	High	TFscore=1
3678	Atf3	4.92e-05	0.281424	0.887	0.664	0.0984134	pre-stalk	FBgn0028550	DNA-binding with transcription factor activity	bZIP	Medium	TFscore=6
3685	zfh1	0.00168492	0.251243	0.943	0.828	1	pre-stalk	FBgn0004606	DNA-binding with transcription factor activity	Homeobox|zf-C2H2	High	TFscore=2
3695	CG9932	1.46e-21	1.14327	1	0.936	2.92e-18	stalk	FBgn0262160	DNA-binding with transcription factor activity	zf-C2H2	NA	TFscore=6
3704	aop	1.33e-18	0.871401	1	0.988	2.65e-15	stalk	FBgn0000097	DNA-binding with transcription factor activity	Ets	High	TFscore=2
3708	ct	4.06e-18	1.09253	1	0.849	8.11e-15	stalk	FBgn0004198	DNA-binding with transcription factor activity	CUT|Homeobox	High	TFscore=1
3717	zfh1	4.17e-16	0.972004	1	0.827	8.34e-13	stalk	FBgn0004606	DNA-binding with transcription factor activity	Homeobox|zf-C2H2	High	TFscore=2
3723	cas	3.68e-15	0.957883	0.949	0.583	7.37e-12	stalk	FBgn0004878	DNA-binding with transcription factor activity	AT_hook|zf-C2H2	High	TFscore=2
3735	Atf3	1.75e-13	0.714025	0.974	0.663	3.49e-10	stalk	FBgn0028550	DNA-binding with transcription factor activity	bZIP	Medium	TFscore=6
3738	Glut4EF	2.05e-13	0.68024	1	0.884	4.1e-10	stalk	FBgn0267336	DNA-binding with transcription factor activity	C-CLIP|zf-C2H2	NA	TFscore=NA
3741	Lmpt	1.31e-12	0.702781	1	0.807	2.61e-09	stalk	FBgn0261565	DNA-binding with transcription factor activity	NA	NA	NA
3787	Sox14	3.54e-09	0.61398	0.949	0.777	7.09e-06	stalk	FBgn0005612	DNA-binding with transcription factor activity	HMG_box	High	TFscore=5
3788	NK7.1	4.22e-09	0.500872	1	0.903	8.44e-06	stalk	FBgn0024321	DNA-binding with transcription factor activity	Homeobox	High	TFscore=5
3804	CG45050	7.23e-08	0.587241	0.974	0.913	0.000144671	stalk	FBgn0266410	DNA-binding with transcription factor activity	NA	Medium	NA
3806	Pur-alpha	9.47e-08	0.379654	0.923	0.697	0.000189368	stalk	FBgn0022361	DNA-binding with transcription factor activity	NA	High	NA
3807	mamo	1.15e-07	0.554911	1	1	0.000229513	stalk	FBgn0267033	DNA-binding with transcription factor activity	zf-C2H2	Medium	TFscore=6
3808	gcl	1.54e-07	0.458474	0.897	0.683	0.000308945	stalk	FBgn0005695	Maybe TF	NA	NA	NA
3811	dl	2.6e-07	0.567783	0.923	0.648	0.000519397	stalk	FBgn0260632	DNA-binding with transcription factor activity	RHD|TIG	High	TFscore=1
3822	apt	1.98e-06	0.402866	0.974	0.797	0.00395405	stalk	FBgn0015903	DNA-binding with transcription factor activity	SANT	High	TFscore=1
3843	fru	2.07e-05	0.331262	0.949	0.883	0.0413388	stalk	FBgn0004652	DNA-binding with transcription factor activity	zf-C2H2	Medium	TFscore=6
3844	Xrp1	2.37e-05	0.415852	1	0.977	0.0474158	stalk	FBgn0261113	DNA-binding with transcription factor activity	AT_hook	Medium	TFscore=6
3849	Trf2	4.65e-05	0.442843	0.949	0.945	0.0929933	stalk	FBgn0261793	DNA-binding with transcription factor activity	NA	NA	NA
3853	net	5.81e-05	0.352958	0.59	0.235	0.116257	stalk	FBgn0002931	DNA-binding with transcription factor activity	HLH	Medium	TFscore=6
3859	sim	0.000103607	0.362954	0.641	0.382	0.207213	stalk	FBgn0004666	DNA-binding with transcription factor activity	HLH	High	TFscore=2
3867	CG32767	0.000315069	0.326977	0.923	0.854	0.630138	stalk	FBgn0052767	DNA-binding with transcription factor activity	zf-C2H2	Medium	TFscore=6
3903	E(spl)m7-HLH	3.73e-39	2.16798	1	0.786	7.46e-36	polar	FBgn0002633	DNA-binding with transcription factor activity	HLH	High	TFscore=3
3912	slbo	4.22e-36	0.305304	0.823	0.21	8.44e-33	polar	FBgn0005638	DNA-binding with transcription factor activity	bZIP	High	TFscore=1
3918	psq	5.87e-33	0.751017	1	0.896	1.17e-29	polar	FBgn0263102	DNA-binding with transcription factor activity	HTH_psq	NA	TFscore=5
3919	mamo	2.4e-32	0.824389	1	1	4.79e-29	polar	FBgn0267033	DNA-binding with transcription factor activity	zf-C2H2	Medium	TFscore=6
3972	dpn	9.59e-20	0.470209	0.772	0.325	1.92e-16	polar	FBgn0010109	DNA-binding with transcription factor activity	HLH	High	TFscore=1
3976	ttk	2.79e-19	0.524955	1	0.93	5.58e-16	polar	FBgn0003870	DNA-binding with transcription factor activity	zf-C2H2	High	TFscore=1
3978	CG15365	1.31e-18	0.54878	0.937	0.702	2.62e-15	polar	FBgn0030077	DNA-binding with transcription factor activity	NA	Medium	NA
3991	brat	1.31e-16	0.487578	0.987	0.883	2.61e-13	polar	FBgn0010300	Maybe TF	zf-B_box	NA	TFscore=NA
3992	dl	2.02e-16	0.370624	0.949	0.625	4.04e-13	polar	FBgn0260632	DNA-binding with transcription factor activity	RHD|TIG	High	TFscore=1
3995	CrebA	1.08e-15	0.461827	0.785	0.528	2.16e-12	polar	FBgn0004396	DNA-binding with transcription factor activity	bZIP	High	TFscore=1
4003	ct	1.11e-14	0.363552	0.962	0.844	2.21e-11	polar	FBgn0004198	DNA-binding with transcription factor activity	CUT|Homeobox	High	TFscore=1
4006	tna	3.91e-14	0.360133	0.987	0.864	7.83e-11	polar	FBgn0026160	DNA-binding with transcription factor activity	zf-MIZ	Medium	TFscore=6
4008	CG9932	5.08e-14	0.330099	1	0.932	1.02e-10	polar	FBgn0262160	DNA-binding with transcription factor activity	zf-C2H2	NA	TFscore=6
4016	edl	5.62e-13	0.427277	0.873	0.569	1.12e-09	polar	FBgn0023214	DNA-binding with transcription factor activity	NA	NA	NA
4040	Sox14	2.7e-10	0.29816	0.962	0.763	5.4e-07	polar	FBgn0005612	DNA-binding with transcription factor activity	HMG_box	High	TFscore=5
4050	Unr	3.22e-09	0.25305	1	0.98	6.43e-06	polar	FBgn0263352	DNA-binding with transcription factor activity	NA	NA	NA
4058	E(spl)mbeta-HLH	5.79e-05	0.295834	1	0.977	0.115726	polar	FBgn0002733	DNA-binding with transcription factor activity	HLH	Medium	TFscore=6
4062	E(spl)mgamma-HLH	0.00203513	0.262405	0.658	0.67	1	polar	FBgn0002735	DNA-binding with transcription factor activity	HLH	High	TFscore=2
4064	HmgD	0	0.760735	1	0.995	0	St2-4 I	FBgn0004362	DNA-binding with transcription factor activity	HMG_box	Medium	TFscore=6
4069	mamo	0	0.616674	1	0.987	0	St2-4 I	FBgn0267033	DNA-binding with transcription factor activity	zf-C2H2	Medium	TFscore=6
4074	jim	3.25e-305	0.58015	0.98	0.875	6.5e-302	St2-4 I	FBgn0027339	DNA-binding with transcription factor activity	zf-C2H2	Medium	TFscore=6
4081	emc	8.16e-266	0.610522	0.982	0.871	1.63e-262	St2-4 I	FBgn0000575	DNA-binding with transcription factor activity	HLH	High	TFscore=3
4082	aop	5.13e-262	0.497439	0.996	0.946	1.03e-258	St2-4 I	FBgn0000097	DNA-binding with transcription factor activity	Ets	High	TFscore=2
4085	ct	1.37e-254	0.562168	0.956	0.701	2.75e-251	St2-4 I	FBgn0004198	DNA-binding with transcription factor activity	CUT|Homeobox	High	TFscore=1
4089	D1	6.09e-235	0.391954	1	0.994	1.22e-231	St2-4 I	FBgn0000412	DNA-binding with transcription factor activity	AT_hook	High	TFscore=5
4095	rgr	1.76e-198	0.424743	0.808	0.558	3.53e-195	St2-4 I	FBgn0267792	DNA-binding with transcription factor activity	zf-C2H2	Medium	TFscore=6
4099	Dsp1	5.91e-187	0.397453	0.988	0.924	1.18e-183	St2-4 I	FBgn0278608	DNA-binding with transcription factor activity	HMG_box	High	TFscore=5
4101	Eip75B	2.11e-177	0.36865	0.988	0.949	4.22e-174	St2-4 I	FBgn0000568	DNA-binding with transcription factor activity	zf-C4	Medium	TFscore=6
4104	CG9932	2.93e-167	0.383741	0.943	0.718	5.86e-164	St2-4 I	FBgn0262160	DNA-binding with transcription factor activity	zf-C2H2	NA	TFscore=6
4111	CtBP	2.55e-156	0.323629	0.997	0.981	5.11e-153	St2-4 I	FBgn0020496	Co-factor	NA	NA	NA
4114	eya	4.2e-153	0.36149	0.96	0.786	8.41e-150	St2-4 I	FBgn0000320	Maybe TF	NA	NA	NA
4122	fru	2.85e-130	0.330911	0.9	0.742	5.7e-127	St2-4 I	FBgn0004652	DNA-binding with transcription factor activity	zf-C2H2	Medium	TFscore=6
4128	edl	2.98e-121	0.278457	0.732	0.507	5.95e-118	St2-4 I	FBgn0023214	DNA-binding with transcription factor activity	NA	NA	NA
4130	sbb	1.04e-117	0.287741	0.947	0.874	2.08e-114	St2-4 I	FBgn0010575	DNA-binding with transcription factor activity	NA	Medium	NA
4133	h	7.72e-112	0.318332	0.865	0.728	1.54e-108	St2-4 I	FBgn0001168	DNA-binding with transcription factor activity	HLH	High	TFscore=1
4141	jigr1	1.65e-104	0.293432	0.789	0.617	3.3e-101	St2-4 I	FBgn0039350	Maybe TF	MADF	NA	TFscore=NA
4142	CG32264	2.07e-104	0.277151	0.849	0.716	4.15e-101	St2-4 I	FBgn0052264	Maybe TF	RPEL	NA	TFscore=NA
4145	Eip93F	2.05e-102	0.280679	0.81	0.651	4.11e-99	St2-4 I	FBgn0264490	DNA-binding with transcription factor activity	HTH_psq	Medium	TFscore=6
4161	tj	3.48e-81	0.25751	0.923	0.843	6.96e-78	St2-4 I	FBgn0000964	DNA-binding with transcription factor activity	bZIP_Maf	Medium	TFscore=6
4162	ttk	8.79e-70	0.253181	0.871	0.798	1.76e-66	St2-4 I	FBgn0003870	DNA-binding with transcription factor activity	zf-C2H2	High	TFscore=1
4163	E(spl)m3-HLH	4.5e-69	0.304228	0.945	0.88	8.99e-66	St2-4 I	FBgn0002609	DNA-binding with transcription factor activity	HLH	High	TFscore=5
4174	ct	1.85e-293	0.618628	0.98	0.701	3.69e-290	St2-4 II	FBgn0004198	DNA-binding with transcription factor activity	CUT|Homeobox	High	TFscore=1
4190	mamo	4.57e-234	0.533038	0.998	0.987	9.15e-231	St2-4 II	FBgn0267033	DNA-binding with transcription factor activity	zf-C2H2	Medium	TFscore=6
4195	D1	1.63e-221	0.385758	1	0.994	3.26e-218	St2-4 II	FBgn0000412	DNA-binding with transcription factor activity	AT_hook	High	TFscore=5
4205	CG42232	3.64e-190	0.386477	0.907	0.701	7.27e-187	St2-4 II	FBgn0250754	Maybe TF	NA	NA	NA
4207	glu	2.47e-188	0.42121	0.93	0.735	4.95e-185	St2-4 II	FBgn0015391	DNA-binding with transcription factor activity	NA	NA	NA
4209	CG4404	3.49e-186	0.390271	0.931	0.752	6.97e-183	St2-4 II	FBgn0030432	DNA-binding with transcription factor activity	BESS	Medium	TFscore=6
4210	rgr	1e-184	0.335998	0.829	0.558	2e-181	St2-4 II	FBgn0267792	DNA-binding with transcription factor activity	zf-C2H2	Medium	TFscore=6
4221	aop	6.44e-174	0.390249	0.995	0.946	1.29e-170	St2-4 II	FBgn0000097	DNA-binding with transcription factor activity	Ets	High	TFscore=2
4225	eya	9.16e-169	0.386212	0.976	0.785	1.83e-165	St2-4 II	FBgn0000320	Maybe TF	NA	NA	NA
4231	Snoo	1.55e-162	0.287623	0.81	0.562	3.09e-159	St2-4 II	FBgn0085450	Maybe TF	Ski_Sno	NA	TFscore=NA
4237	HmgD	9.81e-155	0.364517	1	0.995	1.96e-151	St2-4 II	FBgn0004362	DNA-binding with transcription factor activity	HMG_box	Medium	TFscore=6
4238	Eip75B	2.63e-152	0.344927	0.996	0.949	5.26e-149	St2-4 II	FBgn0000568	DNA-binding with transcription factor activity	zf-C4	Medium	TFscore=6
4243	tsh	7.86e-149	0.264348	0.758	0.515	1.57e-145	St2-4 II	FBgn0003866	DNA-binding with transcription factor activity	zf-C2H2	High	TFscore=1
4244	fru	1.51e-146	0.355583	0.924	0.741	3.01e-143	St2-4 II	FBgn0004652	DNA-binding with transcription factor activity	zf-C2H2	Medium	TFscore=6
4247	emc	3.6e-144	0.404237	0.97	0.873	7.19e-141	St2-4 II	FBgn0000575	DNA-binding with transcription factor activity	HLH	High	TFscore=3
4250	CG9932	3.79e-142	0.344057	0.94	0.719	7.57e-139	St2-4 II	FBgn0262160	DNA-binding with transcription factor activity	zf-C2H2	NA	TFscore=6
4253	jim	1.77e-139	0.344727	0.973	0.876	3.54e-136	St2-4 II	FBgn0027339	DNA-binding with transcription factor activity	zf-C2H2	Medium	TFscore=6
4256	CG32264	1.43e-135	0.316566	0.901	0.712	2.86e-132	St2-4 II	FBgn0052264	Maybe TF	RPEL	NA	TFscore=NA
4260	jigr1	2.19e-127	0.284493	0.838	0.613	4.38e-124	St2-4 II	FBgn0039350	Maybe TF	MADF	NA	TFscore=NA
4275	CtBP	1e-110	0.256738	0.998	0.981	2e-107	St2-4 II	FBgn0020496	Co-factor	NA	NA	NA
4286	Eip93F	7.1e-102	0.265302	0.842	0.649	1.42e-98	St2-4 II	FBgn0264490	DNA-binding with transcription factor activity	HTH_psq	Medium	TFscore=6
4308	HmgD	1.11e-207	0.446382	1	0.995	2.22e-204	PT St4-5	FBgn0004362	DNA-binding with transcription factor activity	HMG_box	Medium	TFscore=6
4313	ct	2.78e-165	0.452608	0.924	0.705	5.56e-162	PT St4-5	FBgn0004198	DNA-binding with transcription factor activity	CUT|Homeobox	High	TFscore=1
4315	CG9932	2.05e-156	0.431531	0.906	0.721	4.1e-153	PT St4-5	FBgn0262160	DNA-binding with transcription factor activity	zf-C2H2	NA	TFscore=6
4319	D1	2.19e-145	0.318741	1	0.994	4.39e-142	PT St4-5	FBgn0000412	DNA-binding with transcription factor activity	AT_hook	High	TFscore=5
4325	jim	2.4e-128	0.37236	0.938	0.879	4.79e-125	PT St4-5	FBgn0027339	DNA-binding with transcription factor activity	zf-C2H2	Medium	TFscore=6
4332	eya	8.31e-117	0.359666	0.915	0.79	1.66e-113	PT St4-5	FBgn0000320	Maybe TF	NA	NA	NA
4338	CtBP	2.66e-105	0.274859	0.996	0.981	5.32e-102	PT St4-5	FBgn0020496	Co-factor	NA	NA	NA
4339	mamo	1.55e-103	0.300771	0.996	0.988	3.11e-100	PT St4-5	FBgn0267033	DNA-binding with transcription factor activity	zf-C2H2	Medium	TFscore=6
4340	E(spl)m3-HLH	1.98e-102	0.44542	0.943	0.88	3.96e-99	PT St4-5	FBgn0002609	DNA-binding with transcription factor activity	HLH	High	TFscore=5
4341	E(spl)m7-HLH	3.36e-102	0.449179	0.824	0.645	6.72e-99	PT St4-5	FBgn0002633	DNA-binding with transcription factor activity	HLH	High	TFscore=3
4359	sbb	2.59e-79	0.28408	0.905	0.878	5.18e-76	PT St4-5	FBgn0010575	DNA-binding with transcription factor activity	NA	Medium	NA
4360	aop	3.26e-78	0.256895	0.972	0.948	6.53e-75	PT St4-5	FBgn0000097	DNA-binding with transcription factor activity	Ets	High	TFscore=2
4364	glu	5.16e-72	0.289993	0.83	0.743	1.03e-68	PT St4-5	FBgn0015391	DNA-binding with transcription factor activity	NA	NA	NA
4366	Eip75B	7.4e-71	0.257015	0.973	0.951	1.48e-67	PT St4-5	FBgn0000568	DNA-binding with transcription factor activity	zf-C4	Medium	TFscore=6
4385	E(spl)mbeta-HLH	1.71e-42	0.269238	0.945	0.903	3.41e-39	PT St4-5	FBgn0002733	DNA-binding with transcription factor activity	HLH	Medium	TFscore=6
4393	HmgD	7.84e-229	0.417951	1	0.994	1.57e-225	MB St5-6	FBgn0004362	DNA-binding with transcription factor activity	HMG_box	Medium	TFscore=6
4396	klu	2.24e-205	0.404903	0.902	0.753	4.47e-202	MB St5-6	FBgn0013469	DNA-binding with transcription factor activity	zf-C2H2	Medium	TFscore=6
4399	D1	2.41e-170	0.275811	1	0.993	4.83e-167	MB St5-6	FBgn0000412	DNA-binding with transcription factor activity	AT_hook	High	TFscore=5
4406	ct	6.02e-149	0.301027	0.914	0.697	1.2e-145	MB St5-6	FBgn0004198	DNA-binding with transcription factor activity	CUT|Homeobox	High	TFscore=1
4408	CG42232	5.05e-148	0.271342	0.856	0.699	1.01e-144	MB St5-6	FBgn0250754	Maybe TF	NA	NA	NA
4409	E(spl)m7-HLH	4.07e-144	0.361494	0.84	0.635	8.14e-141	MB St5-6	FBgn0002633	DNA-binding with transcription factor activity	HLH	High	TFscore=3
4413	eya	1.27e-128	0.285597	0.936	0.782	2.55e-125	MB St5-6	FBgn0000320	Maybe TF	NA	NA	NA
4417	E(spl)m3-HLH	3.7e-96	0.323761	0.954	0.876	7.41e-93	MB St5-6	FBgn0002609	DNA-binding with transcription factor activity	HLH	High	TFscore=5
4431	Six4	1.04e-29	0.333633	1	0.987	2.07e-26	MB St6	FBgn0027364	DNA-binding with transcription factor activity	Homeobox	High	TFscore=5
4433	eya	2.01e-28	0.447918	0.958	0.799	4.03e-25	MB St6	FBgn0000320	Maybe TF	NA	NA	NA
4450	klu	9.86e-20	0.32462	0.879	0.771	1.97e-16	MB St6	FBgn0013469	DNA-binding with transcription factor activity	zf-C2H2	Medium	TFscore=6
4456	CG42232	3.7e-18	0.258537	0.879	0.716	7.39e-15	MB St6	FBgn0250754	Maybe TF	NA	NA	NA
4476	mamo	3.8e-48	0.393849	1	0.988	7.61e-45	AT St5-6	FBgn0267033	DNA-binding with transcription factor activity	zf-C2H2	Medium	TFscore=6
4477	eya	1.19e-47	0.421042	0.949	0.798	2.38e-44	AT St5-6	FBgn0000320	Maybe TF	NA	NA	NA
4481	aop	1.36e-43	0.387174	0.989	0.95	2.71e-40	AT St5-6	FBgn0000097	DNA-binding with transcription factor activity	Ets	High	TFscore=2
4486	ct	2.84e-37	0.387086	0.924	0.72	5.69e-34	AT St5-6	FBgn0004198	DNA-binding with transcription factor activity	CUT|Homeobox	High	TFscore=1
4493	fru	9.19e-33	0.342359	0.906	0.753	1.84e-29	AT St5-6	FBgn0004652	DNA-binding with transcription factor activity	zf-C2H2	Medium	TFscore=6
4497	glu	7.61e-30	0.316655	0.881	0.748	1.52e-26	AT St5-6	FBgn0015391	DNA-binding with transcription factor activity	NA	NA	NA
4502	E(spl)m7-HLH	1.18e-27	0.359295	0.852	0.657	2.36e-24	AT St5-6	FBgn0002633	DNA-binding with transcription factor activity	HLH	High	TFscore=3
4510	klu	2.87e-23	0.319285	0.881	0.77	5.74e-20	AT St5-6	FBgn0013469	DNA-binding with transcription factor activity	zf-C2H2	Medium	TFscore=6
4511	tai	2.58e-22	0.278328	0.928	0.808	5.17e-19	AT St5-6	FBgn0041092	Co-factor	HLH	High	TFscore=3
4523	D1	3.86e-67	0.470169	1	0.994	7.72e-64	PT St6	FBgn0000412	DNA-binding with transcription factor activity	AT_hook	High	TFscore=5
4533	HmgD	6.96e-41	0.411913	0.996	0.995	1.39e-37	PT St6	FBgn0004362	DNA-binding with transcription factor activity	HMG_box	Medium	TFscore=6
4557	eya	6.87e-25	0.322395	0.912	0.799	1.37e-21	PT St6	FBgn0000320	Maybe TF	NA	NA	NA
4580	br	3.27e-260	0.506436	0.917	0.806	6.54e-257	MB St7	FBgn0000210	DNA-binding with transcription factor activity	zf-C2H2	High	TFscore=1
4587	peb	4.43e-134	0.389615	0.918	0.802	8.86e-131	MB St7	FBgn0003053	DNA-binding with transcription factor activity	zf-C2H2	Medium	TFscore=6
4594	E(spl)m7-HLH	2.73e-15	0.251455	0.681	0.657	5.47e-12	MB St7	FBgn0002633	DNA-binding with transcription factor activity	HLH	High	TFscore=3
4610	mirr	7.67e-87	0.315464	0.832	0.635	1.53e-83	MB St8	FBgn0014343	DNA-binding with transcription factor activity	Homeobox	High	TFscore=1
4621	CG1620	0	0.525392	0.996	0.954	0	MB St8-9	FBgn0033183	DNA-binding with transcription factor activity	Myb_DNA-binding	Medium	TFscore=6
4628	mirr	9.77e-297	0.507495	0.898	0.613	1.95e-293	MB St8-9	FBgn0014343	DNA-binding with transcription factor activity	Homeobox	High	TFscore=1
4639	HmgZ	7e-169	0.308874	0.999	0.998	1.4e-165	MB St8-9	FBgn0010228	DNA-binding with transcription factor activity	HMG_box	Medium	TFscore=6
4714	mirr	1.06e-105	0.319287	0.853	0.632	2.12e-102	MB St9	FBgn0014343	DNA-binding with transcription factor activity	Homeobox	High	TFscore=1
4739	mamo	3.35e-60	0.448857	1	0.988	6.71e-57	AT St7	FBgn0267033	DNA-binding with transcription factor activity	zf-C2H2	Medium	TFscore=6
4745	apt	4.41e-43	0.367795	0.889	0.704	8.82e-40	AT St7	FBgn0015903	DNA-binding with transcription factor activity	SANT	High	TFscore=1
4748	br	2.79e-42	0.39084	0.951	0.819	5.58e-39	AT St7	FBgn0000210	DNA-binding with transcription factor activity	zf-C2H2	High	TFscore=1
4752	tai	9.19e-37	0.338022	0.908	0.808	1.84e-33	AT St7	FBgn0041092	Co-factor	HLH	High	TFscore=3
4771	E(spl)m7-HLH	4.13e-12	0.351337	0.76	0.658	8.26e-09	AT St7	FBgn0002633	DNA-binding with transcription factor activity	HLH	High	TFscore=3
4778	CG1620	1.18e-224	0.692266	0.999	0.957	2.36e-221	AT St8-9	FBgn0033183	DNA-binding with transcription factor activity	Myb_DNA-binding	Medium	TFscore=6
4815	peb	5.81e-110	0.414087	0.991	0.809	1.16e-106	AT St8-9	FBgn0003053	DNA-binding with transcription factor activity	zf-C2H2	Medium	TFscore=6
4816	apt	1.07e-108	0.361889	0.929	0.696	2.15e-105	AT St8-9	FBgn0015903	DNA-binding with transcription factor activity	SANT	High	TFscore=1
4838	CtBP	7.18e-75	0.312606	0.999	0.982	1.44e-71	AT St8-9	FBgn0020496	Co-factor	NA	NA	NA
4841	Usf	9.83e-72	0.305402	0.869	0.711	1.97e-68	AT St8-9	FBgn0029711	DNA-binding with transcription factor activity	HLH	High	TFscore=5
4854	tai	2.05e-54	0.264826	0.93	0.804	4.1e-51	AT St8-9	FBgn0041092	Co-factor	HLH	High	TFscore=3
4868	NK7.1	4.48e-14	0.261922	0.721	0.669	8.95e-11	AT St8-9	FBgn0024321	DNA-binding with transcription factor activity	Homeobox	High	TFscore=5
4885	Lmpt	2.46e-22	0.320687	0.819	0.739	4.91e-19	PT St7	FBgn0261565	DNA-binding with transcription factor activity	NA	NA	NA
4889	br	7.14e-18	0.274075	0.874	0.821	1.43e-14	PT St7	FBgn0000210	DNA-binding with transcription factor activity	zf-C2H2	High	TFscore=1
4892	mid	6.2e-12	0.303793	0.621	0.528	1.24e-08	PT St7	FBgn0261963	DNA-binding with transcription factor activity	T-box	NA	TFscore=6
4908	La	1.22e-40	0.442486	1	0.981	2.44e-37	PT St8 I	FBgn0011638	DNA-binding with transcription factor activity	NA	NA	NA
4913	Lmpt	1.71e-28	0.543519	0.93	0.739	3.41e-25	PT St8 I	FBgn0261565	DNA-binding with transcription factor activity	NA	NA	NA
4950	mid	2.17e-275	0.974908	0.973	0.512	4.35e-272	PT St8 II	FBgn0261963	DNA-binding with transcription factor activity	T-box	NA	TFscore=6
4951	H15	9.77e-251	0.676795	0.831	0.215	1.95e-247	PT St8 II	FBgn0016660	DNA-binding with transcription factor activity	T-box	Medium	TFscore=6
4952	pnt	1.15e-230	0.873558	0.932	0.519	2.29e-227	PT St8 II	FBgn0003118	DNA-binding with transcription factor activity	Ets	High	TFscore=1
4968	CrebA	1.21e-103	0.33999	0.806	0.524	2.43e-100	PT St8 II	FBgn0004396	DNA-binding with transcription factor activity	bZIP	High	TFscore=1
4981	Lmpt	7.68e-80	0.438386	0.911	0.734	1.54e-76	PT St8 II	FBgn0261565	DNA-binding with transcription factor activity	NA	NA	NA
5007	bun	2.61e-41	0.295985	0.977	0.912	5.23e-38	PT St8 II	FBgn0259176	DNA-binding with transcription factor activity	TSC22	NA	TFscore=NA
5032	CrebA	2.01e-29	0.981694	1	0.533	4.02e-26	PT St9	FBgn0004396	DNA-binding with transcription factor activity	bZIP	High	TFscore=1
5104	tj	5.06e-10	0.411107	0.978	0.85	1.01e-06	PT St9	FBgn0000964	DNA-binding with transcription factor activity	bZIP_Maf	Medium	TFscore=6
