# Supplementary material for: A single-cell atlas reveals unanticipated cell type complexity in Drosophila ovaries
Source: HighWire-hosted journal article supplement (doi:10.1101/gr.274340.120), 2021-08-13
Supplement: Supplemental_Table_S2.xlsx [file Supplemental_Table_S2.xlsx]

## Sheet: GC
Supplemental Table 2 - Average Expression
Average gene expression of each cluster. Clusters are arranged in columns, and each row corresponds to a gene. The large cluster groups (GC, germarium soma, FC) are each in a separate tab.
	GSC/CB/2-cc	4-cc	8-cc	16-cc 2a I	16-cc 2a II	16-cc 2ab	16-cc 2b	16-cc 3	St2
l(2)gl	0.592727	0.973718	1.00649	0.742949	0.84957	0.803951	0.632732	0.34027	0.293995
CR43609	0.0348432	0.0574751	0.0280099	0.0101369	0.0130548	0	0	0.0109614	0
Cda5	0	0.0101831	0.0136773	0.0293457	0.0333581	0.00437401	0.00874195	0	0
CR46254	0	0.00162248	0.0168205	0.0112407	0.0126896	0	0	0	0
dbr	0.42234	0.611064	0.803736	0.673833	0.602174	0.53362	0.292384	0.149875	0.137516
CR44987	0.0233541	0.0202749	0.032029	0.0245349	0.0654577	0.0655299	0.0570216	0.0316949	0.00654351
galectin	0.0942019	0.211899	0.372584	0.809384	0.7423	0.786521	0.850874	0.796589	0.584725
CG11374	0	0	0	0.00231487	0	0	0	0.00535413	0
net	0.00487417	0	0	0	0	0	0	0	0
Zir	0.272106	0.284871	0.226078	0.310942	0.306953	0.220498	0.218341	0.1199	0.0955773
CG11377	0.0750248	0.145768	0.147088	0.128129	0.141611	0.130786	0.136766	0.101054	0.209397
Nhe1	0.0733252	0.0714945	0.0150999	0.0940085	0.0535426	0.121801	0.0283938	0.0385768	0.102065
Sam-S	0.19247	0.295868	0.301107	0.542141	0.392497	0.496801	0.932926	1.28123	2.00757
ND-15	3.25644	3.27563	3.38246	3.55835	3.12157	2.9761	2.08001	2.20787	2.35486
CG13694	0.0164053	0	0.0152982	0	0.00510923	0.0103388	0.00693602	0	0
CG4822	0	0	0	0	0	0	0	0	0
CG3164	0.0164053	0.00718652	0	0.0870476	0.176171	0.230604	0.192754	0.203964	0.17253
CR44969	0.0220788	0.0206588	0.0157778	0.0530947	0.0149427	0.0104203	0.0119363	0.00727116	0.0075511
Gs1	0.0817695	0.0990276	0.133394	0.624206	0.732537	0.878545	1.55034	0.887463	0.682608
CR44186	0.0091628	0.0244978	0.0132366	0.0489606	0.0112383	0.00832231	0.00642224	0	0
CG31974	0.018074	0.0128089	0.00716995	0.00649966	0.0209576	0.0478281	0.0119074	0.0117126	0.00834684
CG11454	0.0265438	0.194885	0.822111	0.739962	0.806094	0.893574	0.698671	0.461237	0.240482
CG42399	0.00602658	0.00527179	0.0340528	0	0.00785955	0.0158671	0	0	0
CG3709	0.0571278	0.10158	0.145006	0.164087	0.14294	0.234987	0.175747	0.1249	0.0941848
CG3436	1.64687	1.69477	1.39324	1.34467	0.946816	1.02571	0.898077	0.96181	0.92882
CG33635	0.270134	0.3437	0.280422	0.254747	0.357059	0.380618	0.177378	0.129246	0.211579
spen	2.45123	4.75341	5.41986	6.11365	5.40226	3.67535	2.07999	1.36784	0.60869
mRpL10	1.03845	1.04374	1.10794	0.781083	0.564183	0.962859	0.671635	0.765664	1.22193
CG11617	0.00394219	0.0318958	0.0215026	0.0431147	0.0148022	0.0154297	0.00299948	0.00656256	0
Tbc1d15-17	0.204803	0.24275	0.243666	0.162542	0.151636	0.241789	0.223031	0.210616	0.156244
kis	1.18926	3.35211	3.31456	2.26471	2.42745	2.45853	2.08888	1.35966	0.811914
CR44222	0.0045814	0.0207021	0.0427722	0.0150526	0.00598016	0	0.0169506	0.00418948	0
CR44221	0.00439527	0	0	0	0	0	0	0.00140055	0
CR44218	0.0107087	0.0338468	0.0431267	0.0181288	0.0323676	0.0796264	0.00564148	0.0179733	0
Rpp30	0.31937	0.671081	0.58506	0.662325	0.381332	0.416403	0.466006	0.499409	0.377512
CG3645	0.273615	0.277016	0.25083	0.306552	0.252933	0.298065	0.187801	0.207786	0.179922
CG17075	0.0319486	0.0291728	0.0910328	0.244545	0.231319	0.096577	0.104476	0.0320997	0.00784231
CG3345	0	0	0	0	0.0066714	0	0	0	0
mbm	0.460963	0.764906	0.651504	0.665155	0.559118	1.03981	1.48056	1.52377	1.6239
CG11555	0.656857	0.850499	0.750624	0.790079	0.597624	0.560579	0.7421	0.905397	1.50938
CG17078	0.691591	0.871522	0.720665	0.643586	0.493536	0.332501	0.297682	0.255505	0.233405
smo	0.197407	0.22552	0.161603	0.247359	0.250764	0.175268	0.117977	0.123599	0.142003
CG11601	0.206532	0.313878	0.338407	0.221298	0.299603	0.286336	0.307297	0.199485	0.188374
CG3625	0.588893	0.406029	0.867023	0.782124	0.630108	0.38089	0.1844	0.266227	0.0897084
CR46262	0.00858905	0.00154716	0	0	0	0	0	0	0
CR46263	0	0.00197675	0	0.01262	0	0	0.00525415	0.00593548	0
Amnionless	0	0	0	0	0	0	0	0	0
CG11562	1.08372	0.587749	0.641546	0.599528	0.753216	0.622599	0.537666	0.551901	0.715384
U2af38	0.690444	1.07257	0.758686	0.698534	0.448526	0.749562	0.813756	0.627947	0.72799
Hop	1.48199	1.74878	1.83641	1.59876	1.41871	1.66713	1.34622	1.69749	1.4307
Pi3K21B	0.232139	0.23308	0.216034	0.465491	0.476983	0.274408	0.265165	0.199553	0.540973
Plc21C	0.095384	0.204134	0.192132	0.213577	0.262185	0.267983	0.113712	0.122177	0.0733282
CG31921	0.00413737	0	0	0	0	0	0	0	0
Ent1	0.153366	0.113738	0.12058	0.195218	0.183129	0.201749	0.209452	0.180654	0.0996685
CR45367	0	0	0	0.00379847	0	0	0	0	0
CR45366	0	0.00199203	0	0	0	0	0	0	0
CG4213	0.018074	0.00891075	0	0.00648526	0.0142946	0	0	0	0.00232716
RpI135	0.315412	0.319976	0.276908	0.328096	0.296292	0.383451	0.461094	0.48516	0.35247
AP-2alpha	0.48377	0.709417	0.453926	0.278195	0.304285	0.716602	0.586026	0.591114	0.544726
ebi	0.357266	0.295906	0.377815	0.212575	0.211973	0.207867	0.127557	0.0852338	0.17306
CG13690	0.521426	0.803925	0.91261	0.346363	0.187523	0.222867	0.414738	0.59069	0.287528
RpLP1	75.237	72.4934	75.9638	83.8383	88.7624	103.327	154.741	147.842	116.902
CG11885	1.16483	1.34313	1.40403	1.2187	0.94203	0.948074	0.695247	0.687184	0.936463
CG13692	0.167324	0.169522	0.177224	0.259437	0.234534	0.100783	0.0226393	0.00739886	0.000880449
BBS8	0	0.00675409	0	0	0.015995	0	0.00158847	0	0
ex	0.025061	0.0219833	0.0654646	0.0450026	0.0957663	0.0582823	0.0234455	0.0160474	0.0264038
CR43717	0	0	0	0	0	0	0	0	0
crq	0.529485	0.479874	0.602633	0.830985	0.797748	0.569709	0.355199	0.256767	0.375724
shv	0.0663897	0.0819319	0.105051	0.0784656	0.0409435	0.0368758	0.0721812	0.0528621	0.0456023
CG4133	0.00413737	0	0	0	0	0	0	0	0
CG4297	0.00487417	0.00975595	0	0.177566	0.61383	0.54093	0.480663	0.350177	0.0690337
MED15	0.211916	0.163929	0.300197	0.303408	0.260365	0.304048	0.18725	0.145129	0.0944108
ush	0.0380274	0.143967	0.117159	0.199864	0.187148	0.0988147	0.0431334	0.0575221	0.00654059
cbt	0.00884362	0.0286219	0.0618583	0.0951394	0.178064	0.221245	0.254233	0.223178	0.169713
CR46258	0	0.0103724	0.00535971	0.0105478	0.0151939	0.0166883	0.0198684	0	0.00119555
lwr	6.74711	2.88712	1.35361	0.984149	1.06361	1.73703	2.34987	3.40369	3.17566
Spp	0.457546	0.653213	0.911074	0.776835	0.825065	0.923272	0.822644	0.920317	0.848314
Ets21C	0.0956515	0.0792528	0.0474913	0.0670258	0.0304397	0.0176406	0.0212611	0	0.00929817
nAChRbeta3	0.054562	0.00864105	0	0.026566	0.0367326	0	0.00424185	0	0
rempA	0.0370906	0.0394437	0.0750026	0.172953	0.157195	0.135875	0.0383967	0.01239	0.0314019
Tspo	0.514719	0.245911	0.248941	0.996526	1.68974	1.74943	1.03652	0.876013	0.685598
CG11835	0.0860305	0.00449307	0	0	0	0.00717907	0.0024952	0	0.00119555
CG2794	0.401883	0.653449	0.610154	0.933373	0.643862	0.503757	0.283974	0.305932	0.362524
Nle	0.721071	0.670339	0.817529	0.884774	0.748124	0.822008	0.907169	0.846738	0.887866
Sf3b1	0.464671	0.501074	0.592896	0.821735	0.643308	0.40934	0.306441	0.350289	0.162151
Ipk2	0.720519	1.11204	1.75564	1.44026	1.04199	0.524203	0.435958	0.596859	0.585388
cold	0.319026	0.285317	0.305157	0.326774	0.423212	0.484355	0.212603	0.181078	0.275726
Ptth	0	0	0	0	0	0	0	0	0
Pph13	0.018074	0.0109103	0	0	0.00249601	0	0.00600185	0	0
Gsc	0.195111	0.222239	0.21031	0.394134	0.52987	0.27595	0.0579217	0.031087	0.00092989
CR46148	0.207682	0.227517	0.328166	0.381928	0.461053	0.384204	0.172559	0.11429	0.00709444
CG13689	0.0679651	0.1779	0.14125	0.279269	0.0958346	0.0895597	0.05111	0.0892163	0.11884
CR44798	0	0	0	0	0	0	0	0.00422998	0
CG2839	0.338553	0.179291	0.213102	0.323612	0.441922	0.433635	0.166016	0.111112	0.00682357
ds	0.00451665	0	0	0.00183421	0	0	0.0101053	0.00346491	0.0063044
CR46260	0	0	0	0	0	0.00810207	0	0	0
Eaat2	0	0	0	0	0	0	0	0	0
GABA-B-R3	0.0376957	0.0427318	0.105024	0.0726201	0.113863	0.0107033	0.0300268	0.0136287	0.00967424
CG13947	0	0	0	0	0	0	0	0.00507129	0
Pkg21D	0	0.00428352	0	0	0	0	0	0	0
Nnf1b	0.266542	0.111508	0.0564195	0.0699738	0.0784652	0.140828	0.0461	0.111449	0.228284
Dbp21E2	0.257117	0.21947	0.298864	0.345266	0.318167	0.258183	0.215427	0.265443	0.429132
Saf6	0.202242	0.354601	0.294646	0.307324	0.409708	0.231309	0.105026	0.0933551	0.108251
Pex12	0.182013	0.208643	0.178867	0.328606	0.34939	0.250132	0.214545	0.140577	0.194511
PGAP2	0.10763	0.211793	0.223011	0.110324	0.124887	0.106172	0.0739822	0.0449774	0.0725384
Clp	0.710911	0.825192	0.736493	1.01455	0.901318	0.748787	0.573909	0.552184	0.665705
CG3662	0.34106	0.399486	0.208175	0.293624	0.366573	0.462893	0.327651	0.198821	0.285196
CG3862	0.352079	0.501847	0.356702	0.409344	0.427371	0.268248	0.189611	0.150451	0.198055
dock	0.397624	0.792778	1.01314	0.83183	1.14348	0.623705	0.27776	0.21451	0.0988742
drongo	0.236837	0.560879	0.422068	0.487491	0.525783	0.487519	0.372533	0.244471	0.268328
CR44060	0.0313531	0.00967211	0.02445	0.00803521	0	0	0.00285984	0	0
CG4291	0.313929	0.352472	0.182577	0.384934	0.355378	0.354386	0.286845	0.20054	0.197271
kraken	0.791646	0.955503	0.979767	1.34363	1.17515	1.0188	0.788177	0.924243	0.887707
CG13949	0.307167	0.554032	0.694832	0.856566	0.76426	0.445652	0.217775	0.0995008	0.0744409
CG13950	0	0	0	0	0	0	0	0	0
aru	0.342029	0.424269	0.453234	0.625358	0.939662	0.835463	0.451552	0.328389	0.264706
dbe	0.666269	0.772637	0.945533	1.0784	0.690588	0.801538	0.963075	1.00722	0.827453
PNUTS	0.692764	1.07213	1.15659	2.05984	3.50902	2.83013	1.70981	1.07564	0.414894
ninaA	0	0	0	0	0	0	0	0	0
CR45348	0	0	0	0	0.0111485	0	0	0	0
Lsp1beta	0	0	0	0	0	0	0	0	0
IA-2	0.0249639	0	0	0	0.0181304	0.0125179	0.0089034	0.0136594	0.00087493
CG4415	0.344508	0.0705656	0.0213833	0.00188917	0.0157243	0.0278883	0.00655213	0.015626	0.00179811
S	0.559658	0.845613	0.711051	0.70901	1.32098	1.39691	1.39202	0.904631	0.689698
ast	0.0939406	0.161564	0.156259	0.18549	0.152587	0.152229	0.158181	0.155586	0.246801
Atg4a	0.392934	0.35519	0.265204	0.374314	0.494416	0.285375	0.262597	0.203405	0.219195
CG4629	0	0	0	0	0.00394704	0.0146835	0	0.00343509	0
mtRNApol	0.0702916	0.0925115	0.222343	0.296193	0.193992	0.241651	0.124192	0.128001	0.107442
Pino	0.211986	0.293058	0.301409	0.304326	0.609535	0.714048	0.374884	0.428869	0.374634
CG4552	0.0954455	0.0851713	0.066057	0.122412	0.136438	0.129054	0.0606765	0.0899028	0.136996
Iris	0.00451665	0.00914585	0.00580703	0	0	0	0.00347928	0	0.0292634
CG4577	0	0	0	0	0	0	0	0	0
MFS3	0	0	0	0	0	0	0	0	0
l(2)10685	0.205606	0.271844	0.218179	0.314496	0.180218	0.198113	0.179039	0.177228	0.155847
Tfb4	0.532249	0.614456	0.705915	0.583509	0.638116	0.585259	0.517562	0.402656	0.276774
Vps29	0.670361	1.4585	1.0862	0.879853	1.03305	1.37069	1.23681	1.18935	1.19845
capt	0.831668	0.763072	0.387475	0.196038	0.288938	0.325745	0.227295	0.195107	0.330204
CR43767	0	0	0	0	0	0.0144099	0	0	0
Tango14	0.498146	0.714686	0.532384	0.874983	1.10742	0.825314	0.672671	0.620098	0.773847
CG5080	0.217815	0.0400931	0.00365242	0.0557584	0.15718	0.0574458	0.0112701	0.0576279	0.0187968
IntS14	0.313834	0.536354	0.634296	0.626159	0.68057	0.410959	0.279973	0.188181	0.215957
CG14341	0.95307	0.805116	0.706646	1.19096	0.950016	0.653851	0.599354	0.397294	0.278011
Plap	0.787197	0.760421	0.881814	0.398106	0.250771	0.517986	0.461355	0.468547	0.503283
CG31922	0.375091	0.261767	0.15488	0.273688	0.272094	0.316405	0.178314	0.116931	0.07717
Charon	0.311382	0.325256	0.301451	0.312057	0.572536	0.525926	0.580024	0.501238	0.247313
CG4887	0.205313	0.34783	0.251067	0.2174	0.266989	0.252097	0.165957	0.166205	0.203944
CG4896	0.299874	0.355755	0.255667	0.372098	0.424857	0.442809	0.318915	0.229158	0.14257
CG5126	0.607205	0.712667	0.46231	0.662348	0.608328	0.778871	0.452911	0.490175	0.477177
Tgt	0.485524	0.402426	0.578109	0.731395	0.958377	0.736467	0.729399	0.527872	0.328979
CG5001	0	0	0	0	0.00928033	0.0323676	0.0488064	0.0892776	0.0114086
CG5397	0	0	0	0	0	0	0	0	0
CG5561	0	0	0	0	0	0	0	0	0
NLaz	0	0.0395927	0.00801894	0.00232855	0	0.056978	0.0228157	0.00556639	0
CG14346	1.12044	0.224795	0.0267159	0.0169516	0.00804493	0	0	0.0117012	0
robo2	0	0.0314795	0.0194034	0.00711089	0.0251575	0.00895509	0.00405573	0.00430937	0.00280535
CG33128	0	0	0	0	0	0	0	0	0
CG18131	0.216397	0.00517836	0	0.00711089	0.0167948	0.0514264	0.0104394	0.00841159	0.00507139
CG7420	0.09035	0.116973	0.111834	0.178004	0.129814	0.194518	0.144872	0.121815	0.123552
haf	0	0.00399194	0	0	0	0	0	0	0
CG10869	0	0	0	0	0	0	0.00478137	0	0
CG31935	0.0997223	0.040643	0.0470781	0.0680639	0.0750934	0.0299946	0.0366018	0.021322	0.016409
CG14352	0.187964	0.331571	0.369555	0.221729	0.414587	0.255388	0.121385	0.100324	0.127497
RFeSP	4.31934	4.73294	4.62319	3.62394	3.91248	3.76126	3.8368	4.04327	6.01817
chinmo	2.79396	1.85748	1.55787	1.39388	1.1031	1.0799	1.14428	0.826314	0.112533
cpb	1.04661	1.14868	0.987301	1.13551	1.21893	0.460034	0.414417	0.38762	0.658374
CG17660	0.486867	0.460458	0.206561	0.274476	0.240717	0.259915	0.22112	0.187224	0.192547
CR44976	0	0	0	0	0	0	0	0	0
mRpL48	1.36164	2.30366	2.19186	2.65458	2.37949	1.54775	1.13893	1.08762	1.11095
frtz	0.0279707	0.062469	0.0421588	0.133334	0.00873367	0.0669194	0.0226081	0.0419357	0.026754
Rim2	0.376736	0.563516	0.685531	1.16839	1.29315	0.88	0.419217	0.375991	0.22682
Eno	2.5865	1.75739	1.66505	3.16445	5.02858	4.04066	3.10348	3.66739	7.56187
Rrp40	1.05319	1.5591	2.04214	1.85581	1.27868	1.02553	1.13363	1.27445	1.81861
CG31937	0.134991	0.0864718	0.0457583	0.0458107	0.190909	0.238565	0.579731	0.773291	0.672175
CG17652	0.3284	0.394305	0.461628	0.535331	0.408305	0.399272	0.405945	0.319031	0.288987
CG17646	0	0.00393494	0.0258311	0.17252	0.281034	0.368964	0.277698	0.174425	0.0733148
CG17712	0.243451	0.362227	0.153407	0.311779	0.292388	0.153643	0.210279	0.224014	0.288628
CG17648	0.0116984	0.00594579	0.0259403	0.027048	0	0	0	0	0
CG17650	0.325841	0.106389	0.108286	0.128698	0.188084	0.0370119	0.122935	0.13137	0.0309747
CG31663	0	0	0	0	0	0	0	0	0
Wdr62	0.595297	0.909929	0.73527	0.725197	1.17404	2.0457	2.52044	2.07809	0.93343
Der-1	0.830333	0.97381	0.443066	0.380744	0.562871	0.599403	0.523428	0.493995	0.587494
CG15356	0.17912	0.249821	0.223507	0.218295	0.234726	0.194366	0.127394	0.128334	0.0566911
CG15362	0.183361	0.195638	0.23632	0.235028	0.234089	0.204651	0.195335	0.154669	0.233415
CG7289	0.123566	0.239752	0.107803	0.12348	0.132136	0.123653	0.131353	0.176141	0.123259
Got2	0.221012	0.0766521	0.401326	1.05288	1.38044	1.00836	0.697003	0.946584	1.43686
Npc2a	0.124103	0.0919374	0.251583	0.432724	1.18878	2.17095	4.15531	3.28215	1.98331
CR42874	0	0.00399194	0	0	0.0160244	0.00985783	0.0212186	0	0
CG15353	0	0	0	0.00711089	0	0	0	0.00127423	0
Nplp4	0	0	0	0	0	0	0	0	0
CG4238	0.0785365	0.165321	0.120558	0.236233	0.288035	0.180286	0.159455	0.13042	0.275153
Su(dx)	0.135664	0.153033	0.0504253	0.100447	0.137695	0.0896785	0.13984	0.107941	0.134138
CR45298	0.0189354	0.0157653	0.00484464	0.0372216	0.0444875	0	0	0	0
Kebab	0.229305	0.223896	0.242623	0.437222	0.392163	0.258823	0.120491	0.0980882	0.0462006
GlyP	0.0503723	0.0227838	0.00491486	0.235408	0.967213	0.931114	0.966845	1.15483	1.22913
tho2	0.323664	0.428157	0.356518	0.48562	0.328738	0.366142	0.253201	0.197802	0.241631
CG11723	0.427446	0.399114	0.306299	0.285174	0.213825	0.277152	0.198872	0.130523	0.106524
TBCD	0.190763	0.284722	0.272418	0.585881	0.319648	0.219652	0.158418	0.0658747	0.0680199
AIF	0.348902	0.378462	0.452765	0.508377	0.42072	0.406301	0.430226	0.472805	0.550409
CG15382	0.0155125	0.0161718	0.00578836	0	0.0170909	0.0205499	0	0.00674238	0.00212349
aop	0.703052	0.929182	1.02277	1.50157	2.0444	2.08669	1.33503	0.969939	0.761377
CR43751	0	0	0.00905109	0	0	0	0	0	0
CG10874	0.173033	0.272173	0.339071	0.2728	0.200088	0.266561	0.220776	0.0979544	0.129721
CG34172	0.0107743	0	0	0	0	0.00601722	0	0.00171399	0
CG15385	0	0.00638667	0.0138942	0	0	0	0	0	0.00459169
Uch	3.67625	3.65116	2.94754	1.89688	1.83427	1.67568	0.957179	0.907772	1.29588
CG34174	0.493399	0.657251	0.687558	0.632512	0.544321	0.596011	0.244111	0.291968	0.29367
CG10880	1.38524	1.65571	2.26867	2.90292	2.4232	1.79648	1.23889	0.899769	0.684207
mio	0.266999	0.213989	0.292854	0.240331	0.34484	0.192782	0.207342	0.206219	0.127802
papi	0.47019	0.453072	0.353816	0.744421	0.999971	0.97753	0.830387	0.739794	0.222138
CG15387	0.885753	1.34592	1.3813	1.32109	0.625485	0.575048	0.314501	0.158971	0.279348
sau	0.7401	0.525475	0.622938	0.57511	0.799854	0.721395	0.482194	0.278872	0.38351
CR44114	0.00481081	0.00603629	0	0.0190607	0	0	0	0	0
Sec24CD	0.155861	0.241625	0.281932	0.179335	0.242806	0.21322	0.146643	0.0766786	0.177116
CR44115	0.0164053	0	0	0	0	0	0	0	0
CG4267	0	0	0	0.0539443	0.424594	0.404441	0.17271	0.141023	0.315785
CR42859	0	0	0	0.0115577	0	0.00810207	0	0	0
CR43754	0	0	0	0	0	0	0	0	0
CG31681	0	0.0044812	0	0	0	0	0	0	0
CG9967	0.166202	0.368099	0.358349	0.421691	0.371095	0.213753	0.210454	0.138639	0.162113
eys	0.00602658	0.181039	0.191978	0.0381028	0.00501868	0	0.00315972	0.00507129	0
Rab5	1.12755	1.33322	2.6945	3.10184	3.00317	3.39387	2.12228	1.79813	1.73075
Axud1	0.33588	0.393248	0.624773	0.950679	0.954748	0.771356	0.411944	0.326254	0.193088
CG3597	0	0	0	0.01305	0	0	0	0	0
CG3609	0.904566	1.11595	1.17036	1.13373	1.39731	1.36811	0.788932	0.800571	0.51769
CG15390	0.265332	0.135088	0.143766	0.200152	0.180263	0.152697	0.077359	0.0971028	0.180684
CR44982	0	0	0	0	0	0	0	0	0
Atxn7	0.158257	0.100892	0.0491464	0.159636	0.134232	0.145035	0.14389	0.0939114	0.113692
Eogt	0.269673	0.402567	0.315618	0.380654	0.460015	0.335925	0.269784	0.256445	0.1169
PIG-Wa	0.0740514	0.140217	0.104364	0.202403	0.0930667	0.113048	0.0872549	0.0795297	0.022968
VGlut	0	0.00485671	0	0	0	0	0	0	0
CG9886	0.0541744	0.0526636	0.0426038	0.121609	0.124901	0.178365	0.0757047	0.0635445	0.0390838
dpp	0	0	0	0	0	0	0	0	0
Slh	0.276884	0.192441	0.20727	0.214423	0.234673	0.148716	0.175215	0.120887	0.267767
oaf	0.447486	0.521905	0.389286	0.609701	0.538067	0.461704	0.366683	0.402704	0.337716
Cyp309a1	0.183236	0.037037	0.00306675	0.00342801	0	0.0322578	0.0170643	0.0831738	0.0076378
Cyp309a2	0.0109178	0	0.00798161	0	0.00522812	0	0	0	0
insv	0.121348	0.477867	0.828501	0.466138	0.366748	0.197745	0.165871	0.220501	0.139477
Elba2	0.0483714	0.0701813	0.0970916	0.19281	0.321735	0.305912	0.264951	0.357927	0.588386
ND-B17.2	2.60282	2.627	2.91396	2.75637	2.60063	1.74398	1.33388	1.33781	1.77436
Arpc5	1.85579	2.41179	2.7286	2.33672	1.47262	1.21685	0.834172	0.909848	1.50702
Drp1	0.915298	0.46302	0.263871	0.255007	0.289141	0.307324	0.245702	0.220035	0.517461
CG31690	0	0	0	0	0.00786882	0	0	0	0
CG15398	0.887183	0.0729116	0	0	0	0	0	0	0
CG31689	0.0479056	0.0192142	0.0114961	0.135785	0.308759	0.498212	0.410429	0.439321	0.385877
Hrs	0.135754	0.193519	0.242376	0.245349	0.193639	0.192615	0.0822572	0.111106	0.078782
CG9961	0.218462	0.0970913	0.0243965	0.150701	0.100563	0.0270645	0.0114702	0.0318434	0.0060473
Cwc25	0.771903	0.878715	1.20703	0.968134	0.818306	0.667703	0.55871	0.494262	0.499044
Pgk	2.16698	1.61642	1.86041	4.29676	6.24108	5.06646	4.82475	4.04456	3.73183
Bacc	5.33154	20.4768	23.7115	23.937	14.0207	13.0943	9.69709	5.39769	7.25407
CR44772	0.00487417	0.00410235	0	0	0.00820959	0	0	0.00559676	0
Trn-SR	0.140833	0.214337	0.184094	0.0666305	0.139398	0.0866657	0.0830857	0.0723442	0.0665176
CG3077	0.149957	0.153815	0.08116	0.133377	0.255483	0.144183	0.169522	0.158268	0.154693
aph-1	0.619885	0.870252	0.649038	0.976849	1.12054	0.888873	0.710541	0.458721	0.489924
Taf10b	1.98122	0.688207	0.517903	0.415941	0.396952	0.459942	0.521052	0.395227	1.13002
Taf10	1.42633	2.20171	2.96895	3.10984	2.04505	1.58944	0.913841	0.854222	1.18546
colt	0.696656	0.800767	0.744245	0.659351	0.694365	0.630706	0.817296	0.97455	1.04211
CG2862	7.13427	7.0214	7.34306	4.86255	3.94443	4.01526	3.60155	3.78365	4.11969
CG15399	0	0	0	0	0	0	0	0	0.00087493
Syt1	0	0	0	0	0	0	0	0.00446483	0
daw	0	0	0.00635208	0.00663058	0.0244063	0.00959518	0.00338288	0.00958367	0.00990575
G6P	0.0338715	0.00352441	0	0	0.0153335	0.00956577	0	0	0
Duox	0	0	0	0.0204511	0.0303967	0.136088	0.189843	0.159987	0.156615
CG3117	0	0	0	0	0	0	0	0	0
CG3104	0.0417985	0.00720627	0.0144477	0.0447112	0.0431424	0.0679749	0.0412973	0.0268021	0.00365906
RpS21	45.6608	30.2182	31.7055	30.6827	33.0813	37.3819	36.762	35.3238	29.5677
CG2991	0.188276	0.560766	0.338808	0.297753	0.292833	0.258291	0.150773	0.0788988	0.0628672
CG31694	0.838968	0.763445	0.50498	0.386804	0.413652	0.623114	0.587661	0.920341	1.03436
CG8814	0.128909	0.2351	0.217905	0.161183	0.25774	0.318808	0.281621	0.299709	0.269267
Prx6005	1.91421	1.47851	1.03489	0.694906	0.753313	0.715675	0.963039	1.06493	1.0911
CG31950	0.607513	0.342311	0.11623	0.187794	0.146292	0.270825	0.213118	0.376117	0.61317
betaggt-II	0.621897	0.506528	0.318605	0.401211	0.371024	0.552828	0.626904	0.544385	0.476774
NTPase	0.233604	0.369181	0.403837	0.405528	0.435524	0.232196	0.286413	0.204734	0.12616
lilli	0.819869	1.04247	1.00903	1.28427	1.33054	1.39724	1.21032	0.613366	0.263669
Rbp9	0.307113	0.173035	0.49704	1.86563	1.6747	1.30803	0.48563	0.220915	0.00904098
Ts	1.66542	2.68283	4.7653	1.29672	0.416432	0.190694	1.43718	3.44723	0.817729
Rrp1	1.73959	1.46623	1.43651	1.25663	0.874534	0.536262	0.756265	0.844688	0.438319
gammaTub23C	0.589287	0.360046	0.203197	0.183634	0.200832	0.274092	0.12987	0.187261	0.132773
CG9641	0.412567	0.330861	0.417891	0.621452	0.497978	0.329061	0.109388	0.234774	0.16628
CG3165	0.115325	0.126086	0.058947	0.0872934	0.110371	0.0877957	0.0378923	0.0545903	0.103349
CG9643	0.832224	0.945169	1.05989	1.00641	0.62856	0.930562	0.988207	1.24688	1.27179
Chd1	0.236945	0.491038	0.355561	0.462054	0.815038	0.533356	0.523229	0.453734	0.395585
Bem46	0.329902	0.514937	0.311064	0.291365	0.192685	0.212513	0.151468	0.177897	0.270168
okr	0.18941	0.419001	0.618086	0.55032	0.450989	0.507362	0.281467	0.270687	0.115416
CG3558	0.251863	0.28391	0.194687	0.239293	0.200176	0.169515	0.137966	0.0961718	0.163137
CG17265	0.54139	0.672759	0.405301	0.565579	0.701202	0.583583	0.270867	0.131434	0.0669134
CG17224	0.145296	0.0662999	0.116066	0.140774	0.304262	0.128571	0.114459	0.083382	0.0154118
CG17264	0.0454052	0.00177212	0.0508879	0.0348898	0.0933705	0.093254	0.0294067	0.029938	0
alpha4GT1	0.481811	0.543634	0.255298	0.371104	0.322033	0.433709	0.268039	0.285146	0.285996
CG3542	1.02823	1.4062	1.14505	0.961156	0.866951	0.805119	0.79285	0.784955	0.553543
Sf3b2	1.59975	1.98439	1.83638	1.94747	1.70645	1.58891	1.07507	1.13814	0.90884
CG17219	0.530416	0.556777	0.416621	0.481241	0.225934	0.340768	0.201764	0.287465	0.318559
GABPI	0.325889	0.326508	0.215214	0.350855	0.479518	0.298216	0.284162	0.201098	0.132274
CG17258	0	0	0	0	0.00276331	0	0.0106276	0.0110785	0.00714732
SerRS	1.68483	1.88611	1.13768	0.916611	0.952236	1.31382	1.65074	2.06902	2.44974
CG17260	0.130438	0.0963929	0.10228	0.110942	0.197132	0.111956	0.137531	0.114002	0.127521
cnir	0.11912	0.158474	0.15389	0.109317	0.184174	0.183668	0.0578521	0.0735891	0.0428974
CG17221	0.304509	0.33605	0.366032	0.45587	0.305836	0.257589	0.271077	0.250261	0.235673
CG17261	0.027641	0.0109144	0.0044274	0.00590159	0	0	0.0808494	0.146864	0.18561
FASN2	0	0.00723342	0	0	0	0	0	0.00495556	0
snRNA:LU	0	0.00706547	0.00819483	0	0.00474574	0	0	0.0051553	0.0110987
snRNA:U5:23D	0.00590014	0	0	0	0	0	0	0.0018867	0.000999236
FASN1	0.21999	0.163755	0.157783	0.154531	0.213027	0.131307	0.225239	0.420444	0.567942
toc	0.0611884	0.0707487	0.0532482	0.368459	0.413778	0.173703	0.167107	0.119688	0.151514
ND-B14.5B	4.2058	4.10613	4.38269	3.57448	3.15906	2.67622	1.93511	2.20219	2.15884
Mad	0.454309	0.5501	0.996341	2.17721	3.11914	1.94816	1.1273	0.713879	0.558703
gkt	0.111678	0.0732218	0.0489782	0.043339	0.0720632	0.0254936	0.00443075	0.0247103	0.0402307
Hydr2	0.418504	0.418383	0.30518	0.154385	0.11965	0.176478	0.121777	0.0908437	0.371534
CG44002	0.0957784	0.144551	0.215921	0.154638	0.158577	0.113458	0.0608254	0.0449436	0.0167765
CR44003	0.0366027	0.0575475	0.142431	0.139293	0.126026	0.125407	0.0823534	0.081217	0.0600002
CG15404	0	0	0	0.0334798	0	0	0	0	0
CG9664	0	0	0.0162178	0	0	0	0	0	0
CG9663	0.0418899	0.0641944	0.0612278	0.0944835	0.0876057	0.111827	0.0797839	0.0859371	0.0505239
CG3277	0	0	0	0	0	0	0	0	0
Fign	0.167387	0.148287	0.244525	0.354232	0.61855	0.454916	0.236344	0.169039	0.0845483
CG8837	0.0224763	0.00179939	0	0	0	0	0	0	0
E23	0	0.0224878	0.0485648	0.232864	0.403772	0.47101	0.44241	0.600949	0.664367
CG34394	0.156127	0.185649	0.124435	0.20949	0.150656	0.131135	0.0624365	0.0891963	0.0881784
CG15412	0.0131014	0.00177212	0.00313392	0	0.0103877	0.00330576	0	0	0
CG9662	0.662121	1.46607	1.5896	0.920455	1.08624	0.782352	0.504669	0.477334	0.63369
Ptpa	0.826403	1.10297	1.24511	1.38359	0.966356	0.870096	0.605604	0.715612	0.455923
pgant2	0.0164053	0.0106329	0	0.0174538	0	0.00829712	0.0128147	0.0187923	0.00422346
CG2772	0	0	0	0	0	0	0	0	0
Snx1	0.603228	1.11791	1.07265	0.385424	0.577281	1.21622	1.29293	0.846649	0.663988
CG12795	0.379609	0.657747	0.658471	1.03475	0.914116	0.793029	0.444443	0.252267	0.528892
Cog3	0.140559	0.156575	0.176444	0.299331	0.207917	0.198862	0.116411	0.106301	0.0427241
Sec5	0.222936	0.272132	0.187552	0.402436	0.258162	0.235967	0.167715	0.162017	0.13501
CG3246	0	0	0.00255523	0.00188917	0	0	0	0.00565291	0
msl-2	0.0625197	0.0719882	0.120222	0.0235258	0.0617029	0.0528621	0.0320333	0.0250678	0.00981793
ND-PDSW	2.37548	3.38333	3.8598	3.72233	3.35882	2.99211	3.08788	2.58036	4.01615
CG3238	0.205524	0.161152	0.22021	0.180083	0.217777	0.277084	0.159099	0.211676	0.17503
CG31776	0	0	0	0	0	0	0	0	0
pgant4	0	0	0	0.0120345	0	0	0	0	0
Thor	0.232237	0.0852525	0.024971	0.53089	0.791533	0.423135	0.273299	0.48386	0.643709
CG15414	0	0	0	0	0	0	0	0	0
tim	0	0.00790773	0.010829	0	0.0231042	0.0122851	0.0145349	0	0.0283011
CG31954	0	0	0	0	0	0	0.0104283	0	0
LeuRS	0.533373	0.679622	0.360572	0.437876	0.48474	0.709279	0.537122	0.583023	0.900345
CG17593	0.295189	0.442017	0.441299	0.377706	0.400943	0.40431	0.316872	0.26157	0.482931
CG3213	0.0112848	0	0.0194733	0	0	0	0	0	0
CG8851	0	0	0	0	0	0	0	0	0
Sr-CIV	0	0.0165381	0	0	0.00858436	0	0	0	0
CG8852	0	0	0	0	0	0	0	0	0
Spindly	0.391205	0.276271	0.249479	0.294307	0.298508	0.310921	0.201828	0.137646	0.0813532
sob	0.00413737	0	0	0.00231487	0.0165932	0	0	0	0
odd	0	0	0	0.0086245	0	0	0	0	0
Dot	0.0848209	0.0306644	0.0580646	0.0125838	0.0515947	0.106109	0.0463416	0.0678099	0.0119087
CG15418	0	0	0	0	0.00966873	0	0	0	0
for	0.102202	0.179957	0.23784	0.257127	0.570904	0.526401	0.613295	0.46389	0.628617
CG3513	0	0	0	0	0	0	0	0	0
CR43364	0	0	0	0	0	0	0	0	0
CG43165	0	0	0	0	0	0	0	0	0
CG16713	0	0	0	0	0	0	0	0	0
IM33	0	0	0	0	0	0	0	0	0
CG3604	0	0	0	0	0	0	0	0	0
CG31778	0.00394219	0	0	0	0	0	0	0	0
CG31777	0.00413737	0.0119818	0.0253813	0.00972206	0	0.0150394	0.00543381	0.00662739	0
cutlet	0.077032	0.175571	0.202414	0.188168	0.0667211	0.0626035	0.0726144	0.09496	0.0505975
CG31955	0	0	0.00769607	0.00999753	0	0	0.00566387	0.00614009	0.00512235
CG2818	0.15186	0.219116	0.256048	0.356309	0.359921	0.38824	0.2193	0.240107	0.118775
Shaw	0	0	0	0	0.00916434	0	0.0124336	0	0
CG10019	0.0369479	0.00337398	0.00306675	0.0020185	0.0278372	0.00895509	0	0	0
CG43707	0	0	0	0	0.00844016	0	0	0	0
CR43704	0.1811	0.0640212	0	0	0	0	0	0	0
bowl	0.0499111	0.0548508	0.0136594	0.00795798	0.00820959	0.0087033	0.0207101	0.00614009	0.0055042
bark	0	0	0	0	0	0.00518072	0.0249537	0.0280509	0.002076
Reph	1.1793	1.063	1.65021	3.18134	3.1159	2.23392	2.18102	1.90077	1.65592
CG3407	0.104848	0.143498	0.175238	0.169916	0.15182	0.0894061	0.0589419	0.0911912	0.0614188
slp1	0	0.00518952	0.00801894	0	0.0144963	0	0	0	0
CR44078	0.0102954	0.0415822	0.0612373	0.10582	0.081258	0.0304187	0	0.0133562	0.00263883
CG3964	0.103569	0.261945	0.24374	0.167303	0.121776	0.0578699	0.0405535	0.0217072	0.0780409
Cep97	0.337136	0.526023	0.384837	0.57172	0.812295	0.535603	0.334217	0.151229	0.0993403
CG31957	0.484736	1.03292	1.47383	1.29117	1.35834	0.877452	0.56624	0.590027	0.826403
capu	0.00949304	0.0105299	0.0533668	0.0678918	0.16455	0.235062	0.219596	0.117416	0.0750157
CG15422	0.018074	0.00570592	0	0.0219011	0.0198148	0	0.00315972	0	0
ed	0.483442	1.56657	1.49193	0.855113	0.838447	0.803582	0.56301	0.426418	0.21271
CR44984	0.00984233	0	0	0	0.0358991	0.0340933	0.0251455	0.0329461	0.0118332
Sr-CI	0	0	0	0	0	0	0	0	0
CR45791	0.0397238	0	0	0	0.0144812	0.0122851	0	0	0
CR44057	0.0645691	0.0138969	0	0	0.0659543	0.0586389	0.0716514	0.0340034	0.0227976
TBCC	0.582667	0.5799	0.563651	0.858286	1.03683	0.810567	0.463889	0.23693	0.22987
lectin-24Db	0	0	0	0	0	0.0309813	0	0	0
CG3714	0.252539	0.210205	0.259665	0.360486	0.631179	0.555185	0.320056	0.358556	0.217999
ft	0.023739	0	0	0.00449333	0	0	0.00442634	0	0.00205249
CG3702	0.791435	1.00667	0.370523	0.513415	0.669311	0.724947	0.810378	0.750861	1.06267
RpL40	40.5843	28.5564	28.4714	26.8195	31.5137	39.2731	47.4268	48.5077	34.5073
CR44608	0.0149035	0.00262636	0	0.00183421	0	0	0.0192774	0.00963927	0.0096477
CR44058	0	0	0	0	0	0	0	0	0
Art2	0	0	0	0	0.00891689	0	0	0.0125694	0.00183109
tutl	0	0.0160968	0.0126733	0.0086245	0	0.0226926	0.00319524	0	0.00988486
bdl	0	0.0163711	0	0	0	0	0	0	0.00318597
Atet	0	0.0026317	0	0	0.0122032	0.0108236	0.00762475	0.0174033	0.00567171
Traf4	0	0	0	0.0157762	0.0326045	0	0	0	0.0104164
CG17612	0.117678	0.23022	0.215419	0.351628	0.347528	0.28683	0.173196	0.115907	0.0403961
Vps53	0.141537	0.119246	0.136581	0.305451	0.238049	0.114398	0.111665	0.0612154	0.0688866
Psf2	0.747997	1.35988	0.806345	0.600753	0.684976	0.859261	0.595599	0.557006	0.333651
Tps1	0.0315417	0.00127948	0.00772971	0.0213268	0.0363855	0.00518072	0	0	0
CG3652	0.588621	0.54591	0.430858	0.454568	0.60604	0.60499	0.433581	0.430148	0.677496
l(2)k05819	0.165224	0.10806	0.0972761	0.225629	0.1542	0.171308	0.097947	0.109458	0.125057
CG33003	0.00910878	0	0	0	0	0	0.00491731	0.00527195	0
Dim1	0.689047	0.818638	0.801494	0.92562	0.952801	0.699857	0.581156	0.546024	0.672104
CG15431	0	0.00675409	0	0	0.0051056	0	0	0	0
Sfp24F	0.0149035	0	0	0	0.0123835	0	0	0	0
CG15432	0.876054	1.12743	1.53041	1.70685	1.38623	0.669128	0.356532	0.366401	0.37773
morgue	0.558274	0.336145	0.181678	0.208202	0.353025	0.363128	0.248906	0.203256	0.197779
Elp3	0.441062	0.321744	0.333178	0.30003	0.285156	0.348136	0.306875	0.307246	0.308652
MFS18	0.221377	0.164762	0.101079	0.0988494	0.153752	0.169612	0.209925	0.114958	0.136287
CG15439	0.0742322	0.118426	0.10936	0.125381	0.123353	0.0866909	0.0587084	0.0455025	0.0268959
CG15440	1.07645	0.790303	0.583972	0.924857	0.825084	0.871462	0.610532	0.453332	0.386482
ND-B8	0	0.017317	0.0831425	0.0785673	0.0686772	0.0155637	0.00216627	0	0.00092989
Gs1l	0.708129	1.01659	0.968423	1.27452	1.06227	1.00588	0.834824	1.23189	1.50766
RpL27A	73.1309	59.8956	68.2343	71.3524	77.9469	79.5709	89.7588	91.7025	84.4812
mRpL27	2.6867	2.43242	2.45093	2.01213	1.68717	1.73245	1.44566	1.61117	1.91371
CG15435	0.0382829	0.0479323	0.0730263	0.0699055	0.0902371	0.15363	0.0705584	0.0640168	0.0804294
CG15443	0.534982	0.67537	0.528255	0.521753	0.394453	0.469685	0.288591	0.278583	0.255227
CG15436	0.350864	0.220364	0.172902	0.187334	0.12153	0.0770514	0.0624899	0.10427	0.0945776
FIG4	0.120342	0.0868532	0.191835	0.115372	0.126981	0.0926022	0.0602504	0.0344718	0.0379786
dpy	0.145293	0.130415	0.143864	0.117308	0.0326677	0.0400264	0.00566387	0.0108879	0
HP6	1.5104	0.878927	0.404686	0.146035	0.0717452	0.0411505	0.0201075	0.0188969	0.0166173
CG3251	0.137155	0.013028	0.0169256	0.0240572	0.00786882	0	0	0	0
Taf12L	0.00962163	0.00417411	0.0271011	0	0.0025528	0	0	0.00366916	0
CG3294	0.243772	0.239584	0.289622	0.326092	0.387591	0.220013	0.141123	0.15855	0.0673188
Clect27	0	0	0	0	0	0	0	0	0
CG15629	0	0	0	0	0.00245303	0.0216472	0	0	0.00529404
CG3225	0.0384038	0.088742	0.0822244	0.0779244	0.104703	0.105966	0.0304565	0.0127231	0.028903
CG15628	0	0.163515	1.71798	2.47382	2.66219	2.28431	0.63007	0.116753	0.00311844
Fnta	1.13513	1.8598	2.09226	2.28575	1.75674	1.6651	1.38063	1.21587	1.03252
Ir25a	0.00922805	0.00439057	0.0152982	0	0.00786882	0.00283586	0	0.00350008	0.0140541
tank	0.219697	0.328747	0.360525	0.602063	0.540732	0.627854	0.414122	0.370455	0.349681
CG12194	0.101866	0.221731	0.0399285	0.268549	0.599119	0.466507	0.202255	0.0812924	0.0400145
mxt	1.09031	0.245544	0.194059	0.599325	0.827888	0.889924	0.698137	0.570743	0.211378
CG11927	0.223088	0.313827	0.275766	0.392379	0.526716	0.409041	0.260576	0.210287	0.0960101
mRpS2	0.817749	1.02286	1.29287	1.65605	1.09689	1.0633	0.920269	0.918705	1.4084
Mon1	0.124475	0.0677404	0.0989035	0.113359	0.212839	0.170215	0.103222	0.164351	0.22434
smog	0.018734	0.00264809	0	0.00916859	0	0	0	0.00895862	0
Cf2	0.0479728	0.151334	0.163989	0.322826	0.413328	0.276558	0.169735	0.148525	0.114945
CG3008	0.745743	0.617291	0.76622	0.758733	0.826249	0.768163	0.557435	0.315698	0.399427
CG15625	0.00439527	0	0	0.0109509	0.0142445	0.0360999	0	0	0
CR45716	0.00730316	0	0	0	0.0168702	0	0.00731608	0	0
CG3036	0.0595507	0.0247622	0.0241273	0.045675	0.0710417	0.14828	0.0588261	0.147731	0.203805
CG2837	0	0.00264433	0	0.0118724	0.0608237	0.0259123	0.00216627	0.008268	0.00318597
hoe1	0.00394219	0	0.0184823	0.144225	0.150989	0.179544	0.111427	0.0930935	0.0872782
hoe2	0	0.0057942	0	0	0	0	0	0	0
CG14044	0	0	0	0	0.00249601	0	0	0	0
mRpL24	1.03541	1.15576	1.12388	1.01289	0.92244	0.819662	0.935581	1.0699	1.48349
betaggt-I	0.305457	0.266946	0.127932	0.189385	0.194612	0.238254	0.15937	0.171606	0.346712
jet	0.204324	0.284026	0.212463	0.337417	0.349222	0.200133	0.201088	0.122385	0.0731245
Jon25Biii	0	0.00262636	0	0	0	0	0	0	0
Jon25Bi	0.0045814	0	0.0102665	0	0	0	0	0	0
Marcal1	0.137861	0.222777	0.149421	0.21229	0.170305	0.179512	0.148295	0.205007	0.146957
CG34124	0	0	0.0044274	0	0.0102224	0	0	0	0
CR43824	0.0158922	0.00283587	0	0.00498857	0.00797763	0	0.00443121	0.0072692	0.00639571
CG34125	1.19555	1.99947	2.68257	2.5493	1.8798	1.68053	1.23144	0.981724	0.856932
eIF3i	3.87914	4.3285	5.28308	4.7746	4.40802	4.58205	4.61907	5.11848	6.8313
Scox	1.34169	1.60782	1.69396	1.69222	1.45278	1.38866	1.08968	1.17972	1.22728
CG3756	0.524469	0.310972	0.325521	0.209522	0.381682	0.549999	0.481048	0.465012	0.467767
l(2)05714	0.607504	0.693147	1.10043	1.13651	0.782786	0.777086	0.464715	0.341196	0.448511
CG14043	0.333496	0.56355	0.748869	0.64014	0.426993	0.483926	0.316093	0.369728	0.401456
mRpL28	1.13956	1.25524	1.76461	1.51332	1.25628	1.0801	1.08788	1.34329	1.69456
Gmd	0.216233	0.493999	0.277462	0.0997202	0.164591	0.217706	0.138914	0.148727	0.13214
CG3792	0.84845	1.31217	1.03208	0.816623	0.935541	0.934129	0.583468	0.573348	0.459932
CG8891	1.8846	1.41531	1.70716	1.12485	0.925753	1.0929	1.60063	2.06293	1.58578
CG8892	0.598675	0.931506	0.580587	0.595199	0.458761	0.391204	0.347798	0.306906	0.348422
CG34126	0.0239177	0.113558	0.2268	0.12298	0.160784	0.105162	0.119776	0.0700805	0.106373
Rtnl1	0.603474	1.84611	2.3952	1.78307	3.54251	2.96703	1.84761	1.82375	2.18882
CG3887	3.035	4.41278	3.55268	4.11012	2.94941	1.82533	1.78279	1.63958	1.95871
vkg	0.0362646	0.0901925	0.133685	0.105097	0.0814898	0.0639376	0.0432898	0.0911468	0.208512
Col4a1	0.443624	0.196098	0.280335	0.240325	0.298268	0.18808	0.172861	0.432137	0.35995
CG31650	0.477323	0.730035	0.654185	0.682962	0.650731	0.528876	0.286172	0.225694	0.218826
CG9121	0.00439527	0.0114626	0	0.00795798	0.0137015	0	0.00307406	0.0100362	0
eIF3h	2.92328	3.16394	4.38455	4.58043	4.87171	4.31929	3.29016	3.23799	3.26337
senju	0.221923	0.241668	0.1671	0.14719	0.275466	0.265017	0.147518	0.113352	0.156213
CG14036	2.58014	1.67219	1.53625	2.71955	2.38167	2.14088	1.9083	2.27171	2.50186
His3.3A	11.6519	9.33848	10.4596	13.1666	10.1583	10.7464	8.45914	6.80013	5.21137
CG31918	0.267614	0.318934	0.145446	0.13197	0.254612	0.294597	0.0835967	0.0132883	0.128275
Rpn11	3.44845	3.71761	3.53577	2.92844	2.2542	2.11651	1.72823	1.97755	3.15342
CR45291	0	0	0	0.00342801	0	0	0.0011324	0.00767071	0
qtc	0.0622107	0.0319381	0.030905	0.0206844	0.0200866	0.0438534	0.0105911	0.0849231	0.0762112
CR43820	0	0	0	0	0.00675518	0	0	0	0.000923066
CR45305	0.018074	0	0	0	0	0	0	0	0
RpL37A	43.3671	27.9121	27.1908	26.2214	29.3373	31.342	31.3235	33.2447	25.3512
pgant5	0.131246	0.249672	0.331172	0.296723	0.396449	0.281838	0.280744	0.249342	0.380091
CG5828	0.484807	0.44898	0.393282	0.410979	0.509244	0.369986	0.30842	0.283853	0.313236
CG4230	0.394962	0.316551	0.222185	0.486898	0.504758	0.485047	0.396292	0.268589	0.143568
ND-13A	3.17236	2.53249	2.9096	3.02629	2.23811	1.79518	1.32655	1.41045	2.12605
Msp300	0.10911	0.0434514	0.133877	0.192799	0.646656	0.484705	0.430807	0.424712	0.309611
Cyp28d2	0	0	0	0	0	0	0	0	0
Cyp28d1	0	0	0.00453508	0	0	0.00295209	0.00445165	0	0
TpnC25D	0	0	0	0	0.00610158	0	0	0	0
tkv	0.200427	0.14823	0.173458	0.34006	0.392758	0.196519	0.16314	0.153871	0.0854183
CR14033	0.380944	0.205159	0.153338	0.178935	0.160095	0.200238	0.0985532	0.243157	0.226431
Cyp4ac2	0	0	0	0	0	0	0	0	0
Cyp4ac3	0	0	0	0	0	0	0	0	0
Bsg25D	0.250981	0.273044	0.253049	0.196373	0.286025	0.310448	0.194829	0.206266	0.26421
Bub1	0.167559	0.21448	0.170843	0.165097	0.253954	0.276211	0.157966	0.127316	0.139445
vri	0.018074	0	0	0.0249858	0.0433728	0.0406131	0.00242514	0	0.00825638
CG14024	0	0.0044812	0	0.00691356	0.0103246	0.020265	0	0	0
Ncoa6	0.980765	1.33043	1.31635	1.66711	2.26871	2.00115	1.22077	0.755674	0.44335
CR44985	0.00413737	0.0128832	0.0301881	0	0.00574843	0.00330576	0	0.00140055	0
cype	11.5495	8.35909	7.70699	5.93246	7.49556	6.96859	4.74705	4.68386	5.88259
CG14022	0	0	0	0	0	0	0	0	0
TotM	0	0.00850113	0.00672942	0	0	0	0	0	0.00209621
CG12512	0.0533949	0.00315759	0.0148731	0	0	0.0342767	0.283943	0.293348	0.278995
H15	0	0	0	0	0	0	0	0	0
mid	0	0	0	0	0.0126791	0	0	0	0.0265861
CR45287	0	0	0	0	0	0	0	0	0
CG7382	0.540352	0.805514	0.662544	0.829852	0.959738	0.759554	0.612491	0.551341	0.480888
cl	3.1181	2.85444	2.51583	2.29418	2.01111	2.0607	2.45004	3.84843	3.15032
Vps52	0.20193	0.22771	0.207095	0.198594	0.214537	0.142219	0.115023	0.0764913	0.112242
CG6907	0.97954	1.07963	0.757048	0.939583	0.872452	0.814277	0.605805	0.543449	0.638172
CR44793	0.030723	0.00994086	0.0402915	0.00943128	0.0197986	0.0166212	0.00285984	0	0
Cap-D3	0.0879919	0.173597	0.1673	0.251772	0.124764	0.0913603	0.059129	0.0663685	0.0368831
CG31648	0.627673	0.637852	0.422433	0.606288	0.551355	0.514547	0.44017	0.337041	0.594034
CG31915	0.0831913	0.130094	0.111275	0.112919	0.12103	0.118748	0.103148	0.0562555	0.0777746
CG7277	0.53879	0.735952	0.631411	0.762735	0.724686	0.548889	0.457511	0.400345	0.383608
tomb	0.294601	0.0715826	0.0308954	0.0654687	0.0652841	0.0627742	0.109598	0.199366	0.0199899
CG14015	0	0.00179939	0	0	0.00706623	0	0	0	0
Hel25E	5.70883	7.91976	5.55234	3.9596	3.61947	5.74892	5.53463	5.54106	6.60996
Lam	3.84301	8.61	10.0902	7.07365	4.24631	5.18205	3.2867	1.9615	1.52188
Oscillin	0.20526	0.0533556	0.0988852	0.0358449	0.0426754	0.113029	0.0858619	0.073354	0.0522285
CG18269	0	0	0	0	0	0	0	0	0
GluRIIA	0	0	0	0	0	0	0	0	0
GluRIIB	0	0	0	0	0	0	0	0	0
Cyp6a16	0	0	0	0	0	0	0	0	0
Hsp60C	0	0.00393494	0	0.011152	0	0	0	0	0
CG7236	0	0	0	0	0	0	0	0	0
sip1	0.10843	0.108513	0.0774899	0.0910789	0.137121	0.102647	0.0620351	0.047681	0.0357613
CG11030	0.611676	0.901869	1.00229	0.974266	1.14078	0.966476	1.21174	1.25551	0.578292
CG11147	0	0	0.00578295	0	0	0	0	0	0
CG11029	0	0	0.0111322	0.0128616	0	0.016102	0.0182644	0	0
obst-E	0	0.00162248	0.00484464	0.016481	0.0144963	0.00545011	0.00550367	0	0.0144474
CG9171	0.20924	0.232603	0.387897	0.351682	0.389229	0.28538	0.275738	0.157284	0.145561
CR31912	0	0.00513004	0	0.0112407	0.00814874	0.00994244	0.00724182	0.00552715	0
CG14005	0.17517	0.24907	0.257509	0.355202	0.366886	0.356351	0.143571	0.188847	0.349365
CG7239	0.490232	0.660926	0.393046	0.717909	0.646445	0.532458	0.315808	0.251008	0.146476
CG11034	0.00657132	0.0176972	0.0375936	0.0328859	0.0574174	0.0263545	0.0644515	0.057815	0.023379
CR44576	0	0	0	0	0	0	0.00657576	0	0
TrissinR	0	0	0	0.00232855	0	0	0	0	0
rau	0	0.0243371	0.0180689	0.0384102	0.0123835	0.0300897	0	0.0182228	0.0135348
CG43185	0	0	0	0	0	0	0	0	0.00575108
CG9029	0	0	0	0	0	0	0	0	0
Acp26Ab	0	0	0	0	0	0	0	0	0
Acp26Aa	0	0	0	0	0	0	0	0	0
bchs	0.00528005	0.0328695	0.0484915	0.0288587	0.0460071	0.03097	0.0184691	0.0102608	0.00309544
Sfp26Ad	0	0.00375592	0	0	0	0	0	0.00147209	0
Gpdh	0.438245	0.639807	0.597174	0.529163	0.845839	0.540171	0.610141	0.656723	1.25764
CR44986	0	0	0	0	0	0	0.00552052	0	0
CG9044	0.0376548	0.170103	0.140995	0.116472	0.136782	0.198804	0.107375	0.0370787	0.0395073
CG13999	0	0	0	0	0	0	0	0	0
CG13998	0	0	0	0	0	0	0	0	0
Vm26Ab	0	0.104445	0.113905	0.206307	0.23484	0.191628	0.188719	0.059872	0.345125
Vm26Ac	0	0	0	0	0	0	0	0	0
Vm26Aa	0.0268579	0.0761398	0.0848231	0.0782899	0.170571	0.13629	0.100562	0.0732452	0.104211
psd	0	0	0.00306675	0.0124969	0.00716647	0.0108236	0	0.00507129	0.00213713
CG13992	0.0358412	0.00486306	0.00716995	0.0112407	0.0275972	0.0129289	0	0.0124314	0.0314357
Ucp4C	0.00413737	0.00994406	0	0	0	0.00840323	0	0	0.0127111
Ucp4B	0	0	0	0	0	0	0	0	0
CR43465	0.00939221	0	0.00633663	0.00203954	0.0123835	0	0.00158847	0.00977458	0.00209621
chic	11.0937	14.0771	9.29096	4.05134	4.90813	8.79481	8.35447	8.91206	8.09463
eIF4A	19.8444	22.7385	22.9919	23.4134	23.2384	24.4215	22.7698	22.7683	19.1067
ifc	0.900032	0.977654	0.706279	0.569148	0.74472	0.938106	0.78563	0.683608	0.691049
lid	0.973895	1.75865	1.41235	1.93863	1.81843	1.54438	1.00911	0.891777	0.364995
Tsp26A	0.274787	0.190873	0.123306	0.294154	0.363671	0.332015	0.147481	0.110935	0.075235
Gal	0	0	0	0	0	0	0.00429128	0	0
CR43866	0	0	0.00716995	0	0.020807	0	0	0	0.00471572
CG9098	0.00602658	0.00448154	0	0	0.00245303	0.0312624	0.0011324	0.00224252	0.0030212
H2.0	0	0	0	0	0	0	0	0	0
CG9107	1.21764	1.34901	1.69601	2.01118	1.57639	1.48269	1.35234	1.35318	1.31796
mtm	0.558683	0.524713	0.525079	0.497277	0.468145	0.401305	0.323012	0.345255	0.413392
CG9117	0.10535	0.163451	0.382847	0.482772	0.204927	0.170817	0.085056	0.0888647	0.0679354
CG31643	0.042452	0.0516851	0.0529907	0.104229	0.142047	0.142285	0.0596946	0.0927747	0.0816814
ade2	0.302849	0.400421	0.272359	0.337249	0.263331	0.416236	0.532807	0.516012	0.544766
slmo	0.116234	0.0424588	0.00689381	0.0493435	0.0259947	0.0312747	0.0313039	0.058864	0.116108
CG12393	0.892515	0.934336	1.32261	1.2559	1.16303	0.895859	0.893443	0.643175	0.539023
CG9135	1.41041	1.71638	0.530389	0.458424	0.444211	0.530767	0.526585	0.344418	0.364708
CG13995	0	0	0	0.00943128	0.0153335	0	0	0	0
CG34180	0	0	0	0	0	0	0	0	0
ND-51	1.76417	1.71249	1.20825	1.57079	1.43526	1.62585	1.35227	1.44483	2.07606
CG13994	0.980019	1.29502	1.17546	1.51327	1.45301	1.06637	0.88822	0.766677	0.645754
Fbw5	0.0987985	0.0794059	0.0994231	0.0800834	0.103733	0.0686644	0.0845086	0.0598603	0.0399965
CG9147	0.370065	0.253581	0.199189	0.231194	0.196267	0.269774	0.239654	0.205091	0.176729
CG9150	0.0596173	0.0122111	0.0198801	0.0160891	0.0170475	0.026208	0.0011324	0	0
Pfdn1	2.52986	2.88578	1.90372	1.40876	0.907762	1.12127	0.725625	0.818554	1.7995
CG9154	0.535885	0.882906	1.01502	0.753199	0.554912	0.36849	0.494277	0.493036	0.315567
Kr-h2	0.592939	0.590577	0.728697	0.510806	0.887303	1.23192	0.827489	0.642432	0.682813
CR9162	0.00487417	0	0	0	0.00542099	0	0	0	0.000880449
CR44773	0.00958769	0	0	0.00625417	0	0.010128	0.00230982	0	0.000880449
Kr-h1	0.095784	0.0290494	0.0302931	0.0799999	0.0381987	0.0820268	0.0591015	0.00426788	0
CG9175	0.203548	0.237379	0.184185	0.152823	0.135423	0.154663	0.146646	0.184027	0.164363
stai	4.65072	1.27377	0.939731	2.63064	3.5771	3.71734	3.37536	2.7944	3.40142
CG31642	0.00413737	0.0049108	0.0132366	0.0109879	0.0151668	0.0300042	0.0103805	0.0087483	0.00277313
Arpc4	2.5588	3.49676	4.14191	3.4331	2.26632	1.79932	1.82368	1.65496	1.78104
WDR79	0.537822	0.441896	0.502894	0.567074	0.381743	0.324739	0.468213	0.36815	0.315675
CG13991	0	0	0	0	0	0	0	0	0
smal	0	0.00616189	0.0152019	0	0.00276331	0.0101766	0	0	0
Ddr	0	0	0	0.00940422	0.00844016	0	0	0	0
PDZ-GEF	0.331203	0.380006	0.220647	0.23906	0.31424	0.404064	0.298132	0.179457	0.139764
Pez	0.0430875	0.142748	0.193342	0.153053	0.138158	0.0923501	0.0925545	0.0658297	0.078437
Cpr	0.307039	0.504555	0.490651	0.601373	0.613061	0.543708	0.588413	0.702564	0.542225
CG9498	0	0.00322605	0	0	0	0	0	0.0183565	0
CG9505	0	0.0201696	0.00529918	0	0.0184276	0.0108236	0.00852944	0	0.0209328
slam	0	0	0.00772971	0	0	0.0122851	0.0502076	0.0655744	0.103515
DIP-epsilon	0.0196071	0.00646697	0.00716995	0	0.00610158	0.00505327	0.00421056	0	0
CG13982	0	0	0.0246263	0	0.0221622	0.0087033	0.0287596	0.0300008	0.00352257
Tig	0	0	0	0	0.0257457	0	0.00450613	0.0134956	0
Fic	0.160259	0.14721	0.211609	0.164121	0.173856	0.196535	0.148848	0.110368	0.2471
CG9527	0.0443703	0.0493097	0.0617196	0.0824237	0.132619	0.0374404	0.0736142	0.221406	0.126293
retm	0.171559	0.238042	0.16541	0.214479	0.165767	0.25871	0.179488	0.0733299	0.0792056
frj	0.200557	0.265577	0.332219	0.187373	0.260443	0.200083	0.222494	0.135946	0.130964
CG16947	0	0	0	0	0.0951972	0.0276473	0.0342893	0.0204863	0.00224248
CG9531	0.256966	0.237926	0.124807	0.221876	0.287264	0.274989	0.31087	0.335493	0.268559
mmy	0.162158	0.189594	0.240526	0.246738	0.256719	0.415629	0.41456	0.556589	0.436004
CG9536	0.176919	0.215999	0.156238	0.234452	0.17465	0.163486	0.151198	0.111291	0.192861
Sec61alpha	1.55304	2.77983	2.13685	1.05419	1.05363	1.5548	1.232	1.12027	1.23664
CR45463	0.0521915	0.0383015	0.0515748	0.0210368	0.00521223	0	0.00651509	0.00735562	0
Daxx	0.186315	0.506476	0.474207	0.575111	0.788498	0.632588	0.466738	0.230168	0.219249
KFase	0.326872	0.35532	0.257538	0.128069	0.123284	0.0716865	0.0160282	0.0552803	0.0286908
epsilonCOP	1.58483	2.25713	2.25257	2.20187	1.74956	2.0102	1.37303	1.27723	1.1596
Phf5a	3.04618	3.42257	3.69425	2.4652	1.64137	1.70975	1.02857	1.21214	1.32429
CG31638	0.159392	0.133438	0.13991	0.133532	0.159341	0.168571	0.236788	0.244127	0.137626
CG9547	0.0164053	0.0359835	0.0451696	0.0691491	0.241535	0.352943	0.343056	0.317865	0.401909
CG31637	0.0515979	0.194944	0.230472	0.213087	0.237692	0.212593	0.122663	0.160659	0.121663
eya	0.00419379	0.0225542	0.0472645	0.0353544	0.0258978	0.0233993	0.00543381	0.0305103	0.0454472
CR44776	0	0	0.00580703	0	0	0	0.00761204	0	0.00311844
IFT52	0.039523	0.0409081	0.0127426	0.0145939	0.00809861	0.00962906	0.0268558	0	0
COX5B	7.40807	7.29693	7.96076	7.88096	6.09979	5.41606	4.57416	5.58248	7.57326
CG9596	0.340602	0.572514	0.828734	1.15803	0.967935	0.678104	0.812645	0.666951	0.842662
Ent2	0.263719	1.35266	1.58122	0.809135	0.491259	0.551634	0.586735	0.590401	0.759804
CG13766	0.0644311	0.0943535	0.102448	0.150338	0.185425	0.173111	0.0545679	0.0762786	0.15908
CG11050	0.23377	0.656621	0.409784	0.252369	0.384925	0.410046	0.312106	0.18908	0.397745
DIP-iota	0.00432697	0	0	0	0	0	0	0	0
CR44913	0	0	0	0	0	0	0	0	0
Oatp26F	0	0	0	0	0	0	0	0	0
CG31635	0.22884	0.37916	0.481268	1.22757	1.55451	1.21003	0.923884	0.395783	0.243158
Tango1	0.320932	0.446107	0.258432	0.35009	0.384827	0.342642	0.281376	0.176507	0.243663
CG31633	0.143826	0.0840042	0.0743637	0.15554	0.143359	0.164344	0.0561863	0.0990023	0.0164624
CG31636	0.016777	0	0	0	0	0	0	0	0
CG11070	0.0653692	0.154576	0.26398	0.200772	0.101367	0.131468	0.133359	0.0897483	0.271002
CG13771	0.0855868	0.131877	0.188818	0.254418	0.182122	0.12784	0.00895571	0.00783535	0.00539174
CG34310	0.14683	0.0699965	0.0644172	0.0756243	0.0281828	0.0596966	0.0517774	0.0232146	0.0340229
Galt	0.0210875	0.033764	0.115729	0.0479534	0.209029	0.458155	0.287957	0.247456	0.1603
Spn27A	0.0852563	0.0559564	0.128379	0.499362	1.84025	1.61487	1.05449	0.745216	0.490621
cort	0.10644	0.0451578	0.0527844	0.00341615	0.0623538	0.0951806	0.112468	0.100803	0.250078
Nse1	0.74206	1.16904	1.6548	1.24371	1.05777	0.799976	0.348035	0.362381	0.354161
Nhe3	0.154579	0.343112	0.362157	0.584571	0.654748	0.430511	0.249916	0.165094	0.108471
CG11327	0.0322058	0.0255538	0	0.0234947	0.0151334	0.00330576	0	0	0
Tsp	0.0174966	0.00162248	0	0.0197639	0.0252137	0.0195424	0.00946839	0.00599046	0
AkhR	0.0141704	0	0	0	0.0294706	0.0256309	0.00623836	0	0
Aatf	0.675375	0.76594	0.765082	1.00637	0.649934	0.635515	0.913102	0.925749	1.07483
homer	0.329201	0.434112	0.231403	0.20473	0.383434	0.485035	0.257056	0.237103	0.38089
Liprin-alpha	0.130553	0.141534	0.0965253	0.130462	0.144298	0.261693	0.223772	0.14957	0.205436
TTLL3B	0.0192297	0	0	0	0	0	0	0	0
CG11221	0	0	0	0	0.00474574	0	0.010672	0	0
CG11322	0	0	0	0	0	0	0	0	0
LUBEL	0	0	0	0	0	0	0	0	0
nrv1	0.0538303	0.0439478	0.0616183	0.42281	0.587886	0.826454	0.673148	0.573309	0.807046
nrv2	0.0269188	0.00552943	0	0.0563526	0.173094	0.158737	0.143378	0.0990968	0.00760934
CG17375	0.018074	0	0	0	0	0	0	0	0
sens-2	0	0	0	0	0	0	0	0	0
Rca1	0.204144	0.241684	0.36255	0.463104	0.373843	0.333745	0.310853	0.164185	0.23412
l(2)k09022	0.14551	0.124376	0.180225	0.182216	0.189003	0.151077	0.235777	0.251111	0.232738
Nlg2	0	0	0.00905109	0.210333	0.934978	0.762372	0.2432	0.0287684	0.0142246
CG13773	0.484066	0.654352	0.650165	0.685434	0.488666	0.681533	0.994771	1.4548	1.95956
Rat1	0.507914	0.527422	0.65131	0.57978	0.422675	0.559128	0.384572	0.352281	0.459722
Wee1	0.513809	0.412473	0.29696	0.279635	0.408559	0.420217	0.24929	0.182847	0.125081
x16	1.5297	2.56465	1.02769	0.391284	0.502284	0.813587	0.843146	0.828659	1.48402
CG32829	0.0303623	0.0150376	0.0504325	0.036045	0.00249601	0.0633468	0.0210644	0.0360933	0.0131949
nop5	4.14808	2.88279	2.98808	2.87128	1.89255	3.94032	5.79713	5.5789	6.60091
snoRNA:nop5-x16-a	0	0	0	0	0	0	0	0	0
Hrb27C	11.4775	11.8812	8.36936	4.66746	6.06044	12.7565	14.3175	12.6766	10.3551
CG43232	0	0.00513313	0	0	0	0	0	0	0
CG18304	0.00394219	0	0	0.00943128	0.0416867	0.0190208	0.0277072	0.0191821	0.00537573
Fgop2	0.711817	1.1297	0.641903	0.455562	0.760557	0.587398	0.367274	0.341492	0.451804
ihog	0.014041	0.0381546	0.0132008	0.029647	0.0384683	0.030277	0.0282151	0.0198664	0.0320344
Gas41	0.714618	0.907901	0.938564	1.10994	0.820812	0.971047	0.296892	0.265413	0.192347
SA	0.405637	0.802985	0.763072	0.662499	0.531564	0.456119	0.24571	0.207298	0.122237
CG13775	0.0562847	0.0725788	0.0599522	0.0964107	0.0613154	0.0863589	0.0655243	0.0702932	0.0312893
CG3430	0.208341	0.200279	0.0503317	0.0709855	0.0598366	0.0687591	0.0953532	0.115997	0.12355
Atac1	0.291423	0.225252	0.192469	0.178513	0.280158	0.318852	0.193541	0.17092	0.154045
CG10399	0.288729	0.333024	0.223902	0.373807	0.442851	0.357925	0.261751	0.296017	0.353371
sip2	0.590823	0.87217	0.47873	0.62986	0.617391	0.649211	0.524685	0.468741	0.214136
Coprox	0.72258	0.755405	0.491251	0.637951	0.727905	0.641761	0.513924	0.439853	0.573378
smt3	30.6266	38.868	43.5023	37.0694	22.2747	18.3372	14.8046	16.5808	16.1731
snRNP-U1-70K	0.755541	0.99197	1.176	0.928356	0.827074	0.858701	0.590883	0.562224	0.805097
uif	0	0	0	0	0	0	0	0	0
CG43322	0	0.00332394	0.00313392	0.0440633	0.0320874	0.0355813	0.0177997	0.0444443	0.0435506
ade3	0.172686	0.220029	0.302431	0.331959	1.06088	1.40102	1.82525	2.50849	1.95432
Pcp	0	0.00187683	0	0	0	0	0	0	0
CG31908	0.403786	0.295608	0.217266	0.174673	0.150782	0.21654	0.18574	0.235499	0.320949
MME1	0.208205	0.370961	0.481669	0.506789	0.339106	0.414378	0.326135	0.339635	0.374687
Rab30	0.0842836	0.0885363	0.0229852	0.0804191	0.0779435	0.077146	0.0378171	0.0503223	0.0623775
Caper	0.950678	0.755377	1.26154	2.02372	1.71176	1.86357	1.36405	0.894859	0.684723
milt	0.363148	0.428108	0.510918	0.628378	0.784177	0.993024	0.635981	0.512532	0.51596
Mnn1	0.557552	0.608801	0.588513	1.01981	1.01009	0.597748	0.467331	0.272405	0.321515
Sem1	4.95519	4.22606	3.44495	2.23168	2.27253	1.94799	1.28069	1.74253	2.29916
Nuf2	0.885526	1.21106	0.892993	1.20538	0.830088	0.654908	0.444746	0.34084	0.242151
Pvf2	0	0	0	0	0.0136683	0	0	0	0
Pvf3	0	0	0	0	0	0	0	0	0
MICU1	0.23819	0.321593	0.314582	0.367749	0.686885	0.719983	0.228857	0.246911	0.259232
CG4496	0	0.0211258	0.130341	0.221874	0.329263	0.31462	0.198543	0.149507	0.0430114
CG4497	0.0910032	0.148193	0.131727	0.0680818	0.078973	0.0476269	0.0307467	0.112439	0.160503
CG4502	2.42407	3.19767	3.90843	5.31196	6.79638	5.26274	4.11293	3.31967	2.32171
CG13784	0.438602	1.01795	1.38342	0.806856	0.89331	1.16559	0.610983	0.394962	0.289194
mEFG1	0.20261	0.251717	0.272086	0.35496	0.561864	0.496599	0.62909	0.665876	0.560723
CR44989	0	0.0129476	0.0052794	0.00785653	0.00929845	0	0	0	0
Ndae1	0.0273092	0	0	0.0020185	0.0328118	0	0.0787356	0.159262	0.12767
CG13786	0	0	0	0	0	0	0	0	0
Wnt4	0.112737	0.0923361	0.0816995	0.0724317	0.0745092	0.0329519	0.114676	0.00175563	0.0175977
wg	0	0	0	0	0	0	0	0	0
Wnt6	0	0.0294415	0.00491486	0.0136939	0	0.0089501	0.00850738	0	0.00471572
CG5149	0.3496	0.536353	0.808676	0.862328	0.857562	0.730006	0.360928	0.398896	0.368461
gudu	0	0	0	0	0	0.00448183	0	0	0
CG5160	0	0.0116939	0	0	0	0	0	0	0
CG5171	0	0	0	0	0	0	0.00608503	0.0212334	0
CG5177	0	0	0	0	0	0	0	0	0
CG5181	0.404492	0.517313	0.325027	0.258134	0.312416	0.314898	0.280062	0.191163	0.28384
CG15818	0.0118198	0	0	0.00498857	0	0	0	0	0
chm	0.133033	0.227846	0.182128	0.264409	0.271395	0.261947	0.181373	0.104813	0.0986261
CR43857	1.69462	0.787987	0.126631	0.0606783	0.0322629	0.0711847	0.0148874	0.0368914	0.0155469
muc	0.827554	0.960574	0.923295	0.45442	0.389329	0.735377	0.775572	0.732949	0.957401
CG5958	0	0	0.0130105	0.0354018	0	0	0.0229992	0.0132358	0.0149147
CG5973	0	0.0044812	0	0.0116497	0.0679662	0.0223938	0.00115624	0.0500363	0.00938811
santa-maria	0	0.00518952	0	0	0	0	0	0	0
CG6055	0	0	0	0	0	0	0	0	0
Ziz	0.0746596	0.0924117	0.0257448	0.0705581	0.0788984	0.0554912	0.0364702	0.075022	0.0624733
Obp28a	0	0	0	0	0	0.00717907	0	0.00576828	0
RapGAP1	1.7139	1.0036	1.07026	1.60494	2.02558	1.9528	1.15472	0.992391	0.44403
CR46063	0	0	0	0	0.00749522	0	0	0	0
CG6739	0	0	0	0	0	0	0.00535772	0	0
Tep2	0	0	0	0.00648526	0	0.0204591	0.00387273	0.016335	0.00413395
Tep3	0	0	0	0	0.00923133	0	0	0	0
CG13795	0	0	0	0	0	0	0.00838042	0.0178829	0
CG7154	1.85178	3.15873	2.90518	2.79809	2.87457	2.46502	1.67751	1.06708	0.598161
CG7149	0	0	0	0.0197752	0.0445908	0.0699242	0.100867	0.0950925	0.0779602
LKRSDH	0.00509068	0.0044812	0.0173185	0.0116035	0.00318773	0	0.00194815	0.00723845	0
Herp	0.262745	0.321485	0.272068	0.309443	0.296675	0.310311	0.155031	0.142234	0.141058
r2d2	0.610542	0.787114	0.515642	0.337541	0.377272	0.538657	0.561204	0.4898	0.46188
cdc14	0.50295	0.364191	0.404399	0.76679	1.0905	1.2853	0.935266	0.738719	0.418721
LanB1	0.385654	0.590845	0.678984	0.322905	0.199687	0.161125	0.0984627	0.117484	0.127243
CR45008	0	0.00154716	0.014666	0.00342801	0	0	0	0	0
CG7115	1.08165	0.729996	0.408809	0.46206	0.621047	0.349713	0.285027	0.318084	0.283172
Rack1	22.6448	19.8274	22.0538	19.9354	20.0008	22.7445	28.2574	29.7889	32.9909
mts	9.58538	13.0631	11.6734	8.73318	6.71958	6.88485	5.14495	4.88505	4.63994
CG14535	0	0	0	0	0	0	0	0	0
spz3	0	0.00675409	0	0.00576665	0	0.00260122	0	0.0101628	0
CG7102	0.122396	0.0524965	0.163611	0.0804182	0.0979886	0.125548	0.0917418	0.0880943	0.0529309
SmE	7.41776	9.33184	7.88111	4.99842	3.93467	3.76955	3.6402	3.42791	3.40455
CG34132	3.74483	3.87846	3.38564	2.31508	2.07495	2.19669	1.94252	2.28275	3.31306
Snoo	0.108994	0.123369	0.0653582	0.0721653	0.100491	0.0698558	0.0838383	0.0279857	0.0112494
CG7231	0.312785	0.17335	0.146068	0.0963241	0.169912	0.305352	0.287262	0.238848	0.166249
pes	0.367861	0.290999	0.136805	0.273919	0.381278	0.506967	0.34601	0.316906	0.263615
CG7227	0.0293851	0.0128127	0.00306675	0	0	0	0.00497987	0	0.00308089
CR44996	0.00487417	0.00726265	0	0	0	0.0064727	0.00651509	0	0
Sirup	1.41995	1.89257	2.56938	2.99837	1.78921	1.00411	0.889057	0.548849	0.574307
Wwox	0.17609	0.206565	0.23789	0.229066	0.0981872	0.0918692	0.121176	0.105634	0.0603685
Spn28Dc	0	0.0121931	0	0	0.00844016	0	0	0	0
CG12560	0.14535	0.0668641	0.0329033	0.0192602	0.189391	0.144194	0.0795038	0.0725815	0.130751
CG34010	0.038032	0.00918872	0.0234453	0	0	0.0145065	0.0298031	0.0209862	0.0124211
Tg	0	0	0	0	0.00717307	0	0	0.00127423	0.00092989
CG7367	0.068836	0	0.0152323	0.00997648	0	0	0	0	0
baf	6.25678	11.6578	10.7161	9.15706	4.19802	3.67385	2.67121	2.2224	2.74091
Cka	0.994109	1.54773	1.39643	0.848414	0.925895	0.894529	0.564214	0.365959	0.226519
CCDC53	0.201709	0.2209	0.194993	0.300382	0.251559	0.275919	0.166651	0.155225	0.256567
RpL36A	37.1543	31.4085	34.5336	35.3596	35.9776	36.3914	42.86	47.7389	45.0565
snoRNA:Psi28S-2648	0	0.00723342	0	0	0	0	0.0109607	0	0
CG7466	0.0493961	0.0556709	0.0835126	0.0579807	0.106261	0.0631357	0.0417248	0.0426765	0.053137
poe	0.380488	0.613331	0.505446	0.554473	0.50896	0.435093	0.545161	0.308802	0.37708
MED20	1.06679	1.12806	1.01808	0.956311	0.799404	0.799126	0.345027	0.248178	0.196025
Trf	0.285163	0.372385	0.431296	0.348811	0.343582	0.277593	0.167743	0.192335	0.143605
Mcr	0.603884	0.997933	0.923618	0.653063	0.572102	0.324733	0.137983	0.169283	0.0949118
Bsg	3.86512	6.11322	5.58759	3.96122	5.41309	4.92926	3.60844	2.90038	1.35038
mon2	0.117921	0.191792	0.0705691	0.133751	0.120426	0.0659275	0.0398149	0.0689129	0.0568619
CG8673	0	0	0	0	0	0	0	0	0
CG12375	0.362687	0.205326	0.383816	1.04253	0.907655	0.84544	0.61979	0.428051	0.432346
CG8668	0.371547	0.394927	0.198099	0.257057	0.264587	0.36913	0.249453	0.318781	0.235715
PAPLA1	0.088063	0.174532	0.228874	0.17622	0.135552	0.189359	0.077856	0.117966	0.114492
CG43394	0.01032	0.0294722	0.0222788	0.0518061	0.0488528	0.020639	0.0164034	0.0311123	0.00180352
Rbsn-5	0.397827	0.548591	0.474051	0.413918	0.588843	0.488901	0.428235	0.220519	0.292571
CG8498	0.606821	1.22322	1.29722	1.04823	0.902817	0.638834	0.770674	1.23718	1.94035
Piezo	0.040672	0.132068	0.0713739	0.0853601	0.11359	0.0725944	0.111221	0.102395	0.0369248
CG34134	0.0651354	0.0883697	0.0650845	0.0143311	0.0224454	0.0242722	0.0235998	0.0311813	0.0219239
CG8475	0.138524	0.180933	0.16116	0.24809	0.298039	0.202686	0.194835	0.147058	0.15587
CR44116	0	0	0	0	0	0.0067932	0	0	0.00102424
CG8460	0.916009	0.450961	0.221072	0.227114	0.279123	0.341182	0.290975	0.27296	0.291928
PGAP5	0.182725	0.204773	0.220967	0.275798	0.117574	0.200246	0.109384	0.122497	0.0792545
SLC5A11	0.0343043	0.0146611	0.0475781	0.195593	0.41163	0.238947	0.217872	0.237106	0.216076
CR44119	0.00468223	0.024225	0.0052794	0.00546756	0.00968911	0.00988819	0.0134101	0.00590006	0
CG8419	0.00590014	0.00283487	0	0.0520201	0.0615444	0.023825	0.0233763	0.0400747	0.0157588
Su(var)205	5.56241	9.91801	10.9049	6.03013	3.18023	4.72343	4.8101	4.32091	3.95221
Ssb-c31a	10.6968	11.485	14.4472	13.8933	10.8458	8.12093	5.5446	4.65049	3.68655
CG8372	1.22621	1.19853	0.831031	1.12685	1.10395	1.15645	0.813098	0.934326	0.750184
CG8360	0.189235	0.15012	0.0581987	0.178006	0.196386	0.182109	0.265972	0.26855	0.258701
CG8353	0.0537958	0.049076	0.0335015	0.0764903	0.0409716	0.0957944	0.048055	0.0721148	0.0406264
CG8349	0	0	0	0	0	0	0	0	0
CG8292	0	0.00997266	0.0106391	0	0	0.0215591	0.00639048	0	0.00153362
Snx6	0.681129	0.778158	0.48783	0.593754	0.42613	0.633429	0.613659	0.608129	0.893655
Pvr	0.00730316	0.0226621	0.0703683	0.121389	0.075999	0.0277329	0.00826299	0.00827439	0.0112247
CG8086	0	0	0	0	0.0103877	0	0	0	0
Btk29A	0.295322	0.336228	0.443029	0.911497	1.07344	1.16639	0.930718	0.571977	0.464881
wol	0.367574	0.43711	0.233571	0.370358	0.278086	0.410077	0.221522	0.202516	0.275708
Scgalpha	0.0947256	0.00462708	0	0	0	0.0326096	0.022126	0.120144	0.0240481
CG7840	0.293775	0.773716	0.832805	1.01236	0.913364	0.973631	1.19952	1.12444	1.64145
Ostgamma	0.911212	1.80251	1.92272	1.40005	1.14831	1.14294	0.986101	0.902306	1.14786
Mettl14	0.544084	0.612127	0.567405	0.436565	0.473723	0.351897	0.277482	0.218667	0.157522
CG7810	0.327968	0.350075	0.346318	0.470909	0.364444	0.378811	0.22353	0.169659	0.153895
CG7806	0.0396504	0.0966937	0.142156	0.104892	0.100013	0.0971896	0.0765073	0.086432	0.0496011
mtsh	0.181712	0.0309137	0.0044274	0.036137	0.0546834	0.0390457	0.0477925	0.0517568	0.00423002
CG7787	0.549041	1.05451	0.598678	0.676217	0.633606	0.562708	0.350347	0.369177	0.585103
CG7781	0	0	0.00716995	0.0133323	0	0.00283586	0	0	0.00248868
CG14275	0.0312532	0.00946998	0.00580703	0.0085296	0	0	0	0.0116779	0.0379356
CG14274	0	0	0	0	0	0	0	0	0
CG7778	0.00439527	0	0	0	0.00705876	0.00518072	0.00442634	0.00175563	0
Mur29B	0.0239119	0	0	0	0	0.00890047	0	0	0
CG7627	0.265202	0.269309	0.229697	0.314189	0.384352	0.414205	0.724352	0.735728	0.953306
RpS13	46.8393	31.2412	30.2227	26.6733	29.4357	29.5146	26.286	30.485	29.0091
CSN8	3.043	3.52559	3.87955	3.56619	2.68049	1.96057	1.44586	1.51487	1.64014
Pp2A-29B	2.73331	2.67103	1.76851	1.24303	1.36019	1.90192	1.28301	1.12919	1.15298
CG17292	0.201832	0.268533	0.679463	1.11461	1.43609	1.3385	1.21434	1.23282	0.694805
Wdr82	0.953994	0.781126	0.624726	0.470901	0.452275	0.53826	0.3364	0.216244	0.324107
CG13390	0.465888	0.275704	0.462711	0.450674	0.547741	0.468402	0.348357	0.438963	0.194149
CG17294	0.559274	0.632435	0.69554	0.519596	0.444532	0.332821	0.237757	0.169168	0.175251
AlaRS	0.98083	1.1615	0.96763	0.48006	0.508996	0.641411	0.732045	0.88347	1.1497
CG13392	0.350602	0.367046	0.374593	0.47849	0.334477	0.270177	0.136794	0.173406	0.290459
Rcd4	0.888716	0.691293	0.863376	0.753442	0.639032	0.475629	0.312296	0.262696	0.280477
Dad1	2.95552	5.18488	5.91321	4.75582	3.65414	2.37872	1.79534	1.39842	1.37934
CG13384	0.171302	0.21736	0.088239	0.130346	0.141344	0.144627	0.0261526	0.0671706	0.100238
CG42819	0	0	0	0	0	0	0	0	0
snRNA:U6atac:29B	0.0641616	0.0300389	0.0189488	0.00232855	0	0.0172675	0	0.00510523	0
Peritrophin-15a	0	0.0044812	0	0	0	0	0	0	0
CG13386	0	0	0	0	0	0	0	0	0
CG31898	0.296656	0.334354	0.460397	0.775501	0.679086	0.311188	0.117842	0.126021	0.0340275
fy	0.144466	0.0818845	0.189071	0.0648084	0.122634	0.0668185	0.0365782	0.043614	0.0528268
CR44991	0	0	0	0	0	0	0	0	0
emb	1.96304	2.10157	0.995362	1.16625	1.01935	1.22803	0.903741	0.890097	1.11513
CG13397	0	0.00854188	0.0244285	0.107409	0.607522	0.703234	0.558059	0.367721	0.554379
CG13398	0.134199	0.154345	0.183613	0.208309	0.153247	0.221962	0.185697	0.129754	0.201603
Akap200	5.91711	6.73646	8.46501	7.77152	4.99997	5.51536	4.379	3.39137	2.19764
grk	0.0453785	0.0132802	0.0510729	0.0665291	0.614685	0.945912	0.794483	1.02014	0.219297
D12	0.151305	0.159859	0.202101	0.227703	0.21604	0.193557	0.168711	0.131654	0.0948359
Chrac-14	3.06948	4.32712	4.93082	4.09113	2.57061	2.31712	2.05771	2.23423	1.35911
mus201	0.128507	0.205156	0.207259	0.180484	0.195245	0.191976	0.161867	0.0914005	0.132597
CG31897	0.0225438	0.0215625	0.0121196	0.0511563	0.0361743	0.0521544	0.0402951	0.0230116	0.00810538
U26	0.0526236	0.0521071	0.0703982	0.0460668	0.0116851	0.061059	0.0872906	0.118989	0.0742346
fu12	0.419022	0.178804	0.206316	0.185916	0.242649	0.486922	0.377823	0.35578	0.518699
fu2	0.252682	0.441867	0.343007	0.394516	0.433354	0.321339	0.353524	0.257605	0.180649
d	0	0.00393494	0	0.00379847	0.0106384	0.0253547	0.00319524	0	0.00731674
CheA29a	0	0	0	0	0	0.0151285	0.00405573	0	0
CR43604	0.00419379	0.0136217	0.00306675	0.0188668	0	0.00804177	0	0.00493994	0
CG13088	0.183294	0.376642	0.385643	0.343144	0.280129	0.273582	0.192576	0.136377	0.116141
CG43400	0	0.00118084	0	0	0	0	0	0	0
Dh31	0	0	0	0	0.00726653	0.00994244	0.00230982	0.00596051	0
CG13096	1.81301	1.91777	1.23625	0.955776	0.838439	1.48744	1.99442	2.33098	2.50555
CG13097	0.6026	0.662251	0.559233	0.705553	0.658165	0.734405	1.03863	1.0882	1.16886
PIG-U	0.400565	0.7206	0.458835	0.455275	0.29089	0.559963	0.351187	0.272607	0.33019
mRpL51	0.953191	0.914978	0.9916	0.925819	0.787567	0.66424	0.63052	0.707223	0.823575
Uba4	0.17251	0.0776557	0.0734938	0.102814	0.187255	0.122236	0.107557	0.200453	0.230382
CG13091	0.0324217	0.00162248	0.00484464	0.00912165	0.0294028	0.0451342	0.0011324	0.0150038	0
Acer	0.357405	0.554209	0.666257	0.945469	0.642927	0.236367	0.265696	0.265919	0.19221
CG17834	0.0928093	0.0194438	0.0463973	0.453648	0.489703	0.477348	0.368334	0.183222	0.136043
Sema1a	0.437426	0.534422	0.542137	0.663577	0.621049	0.583185	0.302758	0.18365	0.131447
Glt	0.0145402	0	0	0.0032296	0	0.00275236	0	0.00719691	0
CG9289	0	0.00558137	0	0	0	0	0	0	0
PrBP	0.451868	0.184885	0.343012	0.353723	0.242246	0.217511	0.212628	0.231989	0.280023
Trs23	0.491491	0.453899	0.792203	0.718217	0.405887	0.261167	0.226894	0.209122	0.17996
Hnf4	0.233693	0.407941	0.352858	0.730268	1.05324	1.22728	1.12288	0.90312	0.424129
CR44992	0	0	0	0	0	0	0	0	0
raw	0.26134	0.185219	0.220183	0.335633	0.439382	0.341848	0.23524	0.225776	0.0849585
SoxN	0.00602658	0.015808	0	0.0133868	0.00989706	0	0	0	0
CR44414	0	0	0	0	0	0	0	0	0
CG34398	0	0	0	0	0	0	0	0	0
CR46071	0	0	0	0	0	0	0	0	0
CG9510	0.0231031	0.0758581	0.0611458	0.0101112	0.0159799	0.0113475	0.0422701	0.0397334	0.0220227
CG9515	0.171966	0.209605	0.382455	0.332355	0.297896	0.284357	0.275224	0.276384	0.31439
C1GalTA	0.332822	0.647199	0.814856	1.06492	1.47331	1.59206	1.04688	0.676542	0.367102
CG31886	0.0520373	0.0873624	0.0388107	0.0445533	0.049742	0.092011	0.0951767	0.0573449	0.0724774
CG9541	0	0.00264809	0	0	0	0	0	0	0
CG13101	0	0.0259929	0.00633663	0.0020185	0.00705876	0.053919	0.0122216	0.0683991	0.14663
rost	0.0500498	0.00857533	0	0.0914269	0.14856	0.1248	0.156569	0.276166	0.782372
CG9555	0	0	0	0	0.00815301	0	0	0.011005	0.00662165
alien	1.91029	1.73987	1.99327	1.80267	1.35978	1.04209	0.965148	0.926696	0.872099
CG18661	0.208513	0.293388	0.656671	1.18686	0.881957	0.678918	0.672461	0.431077	0.438623
Try29F	0.0338718	0.0715916	0.0464233	0.0173065	0.0641401	0.060017	0.0333029	0.0281078	0.00480264
CG13102	0	0	0	0	0	0	0	0	0
Rcd-1r	0.535886	0.505973	0.689288	0.531936	0.290551	0.111684	0.0733581	0.0751965	0.034614
CG32982	0	0.00399194	0.00801894	0.0129705	0.0139611	0	0	0	0.00119555
CG13108	0	0	0	0	0	0	0.010018	0	0
CG9586	1.21745	1.21131	1.45249	1.78404	1.41688	1.1454	0.692781	0.954711	0.910853
tai	0.0540988	0.0802921	0.18555	0.202609	0.246111	0.272712	0.170636	0.098726	0.111163
aust	0	0.00464921	0	0	0	0	0	0	0
CR43734	0	0.00421766	0	0	0	0	0.00416422	0	0.00209621
borr	1.27168	3.26025	3.13015	2.17291	1.06106	0.828237	0.654074	0.678377	0.597539
Ggamma30A	0.00528005	0.00832651	0	0	0.00501868	0	0.0136629	0.00151757	0
Cks30A	1.1772	1.34515	0.358472	0.306617	0.693649	0.848045	0.577282	0.500159	0.357009
Eaat1	0	0	0	0	0	0	0	0	0.000880449
Shawl	0	0	0	0	0	0	0	0	0
Aldh	1.48815	0.558466	0.204061	0.214798	0.546836	1.38867	2.10388	3.41555	2.9457
CG4438	0	0	0	0	0	0	0.00429128	0.00731373	0
Mco1	0	0	0	0	0	0	0	0	0
FucTB	0.0976608	0.224469	0.160993	0.288836	0.203574	0.187055	0.1265	0.0555134	0.044184
scat	0.155488	0.150248	0.108232	0.160938	0.170761	0.0838109	0.102777	0.0995241	0.154183
CG3769	0	0.00619637	0.00905109	0	0	0.0305856	0.00347928	0	0
numb	0.29401	0.369055	0.385598	0.367761	0.536044	0.551157	0.354704	0.265068	0.199358
Gdi	1.39658	1.33957	1.40004	1.63056	1.41634	1.29342	1.43342	1.44778	1.40108
CG33298	0.23894	0.255218	0.219258	0.360779	0.441409	0.528619	0.451287	0.217857	0.185718
Oatp30B	0.0907319	0.0863228	0.14054	0.177436	0.12047	0.0896794	0.0756529	0.0511895	0.0798676
CG31883	0	0	0	0	0	0	0	0	0
CG17855	0	0	0	0	0.0290606	0.0280075	0	0.0196571	0.00205249
Cpr30B	0	0	0	0	0.00923133	0	0	0	0
jp	0	0	0.00672942	0	0.00610158	0.00260122	0	0	0
CR44149	0	0	0	0	0	0.00505327	0.0101532	0	0
CG3838	0.363439	0.167754	0.267704	0.145255	0.413908	0.438174	0.650539	0.578689	0.357729
Mtpalpha	0.916314	0.971898	0.648782	0.911104	0.876242	0.95603	1.11756	1.16439	1.04574
CG31709	0	0	0	0	0	0	0	0	0
gcm	0	0.00616189	0	0	0.00778168	0.00385996	0	0	0
Trx-2	5.5366	5.69876	5.52234	5.23041	4.76273	3.66555	3.61712	3.96372	6.18849
GlcAT-S	0.133619	0.094065	0.0568049	0.0997745	0.0578689	0.0774856	0.0360263	0.0379272	0.0644628
Pka-C1	1.97912	2.32973	2.66795	3.41095	2.72362	1.69261	0.960896	0.65413	0.411256
hoip	8.16925	6.97854	7.20099	5.74213	4.50828	7.81934	12.9133	16.0753	19.1875
pelo	0.590877	0.884733	0.669041	0.654125	0.949566	0.506243	0.502616	0.405	0.755807
CG31710	0.00439527	0.00915185	0	0	0.0281625	0.0522763	0	0.00916215	0.015697
CG4364	1.7702	1.19536	1.26929	1.38961	1.44004	1.88613	2.28141	2.49585	2.97093
CG13117	0	0	0	0	0	0	0	0	0
zf30C	0.564138	0.530038	0.442577	0.599002	0.570094	0.691784	0.468339	0.331378	0.284305
Taf11	1.0097	1.08248	1.50206	1.45861	1.17713	0.833114	0.671143	0.565533	0.510662
und	1.37636	0.656015	0.322392	0.371176	0.341485	1.09574	1.82441	2.53651	3.15076
CG4017	0	0	0	0	0	0	0	0	0
CG17633	0.0453138	0	0	0	0	0	0	0	0
IP3K1	0.0392326	0.0208852	0.0289135	0.127081	0.16855	0.125336	0.143069	0.0895935	0.173222
CR18854	0.0920847	0.175069	0.213494	0.4047	0.600781	0.211028	0.177496	0.0976602	0.278797
CG4036	0.637468	1.09889	0.853622	1.37893	1.0983	0.673908	0.594691	0.765877	0.547118
CG13123	0.18533	0.158098	0.296373	0.215114	0.220162	0.304331	0.108457	0.0581703	0.0490386
nAChRalpha6	0	0.0105282	0	0	0	0.0059371	0	0	0.00339611
FKBP59	6.30354	5.50362	5.69937	5.61384	4.27304	3.69299	4.0322	5.00273	5.19943
CG34183	0.390878	0.614664	0.642275	0.587133	0.619413	0.553397	0.268145	0.237596	0.157694
CG4537	0.400486	0.366581	0.535964	0.54583	0.593193	0.489721	0.20406	0.134242	0.10121
mtDNA-helicase	0.177027	0.0979648	0.0748465	0.128702	0.115371	0.35734	0.350098	0.365941	0.296657
Uhg2	0.653168	0.36535	0.263497	0.290178	0.435448	1.06699	0.936825	1.08865	1.1703
Bka	0.993457	0.922369	0.811495	1.1336	0.865012	0.961994	0.999053	1.02417	1.23115
RpS2	47.6787	45.4646	50.6099	54.3134	56.7201	65.5432	83.5077	84.1693	104.284
Muc30E	0.0045814	0.00700363	0	0.0120924	0.00260612	0	0.00405573	0.00175563	0
CG13124	0.0417549	0.0291809	0.00578836	0.0237626	0.106187	0.0646659	0.0406167	0.0397281	0.0036804
Etl1	0.316968	0.411707	0.351424	0.323426	0.285371	0.238577	0.324373	0.23712	0.314936
Srp54	1.25315	1.19982	1.0375	1.45434	1.40432	1.17253	0.936491	0.938774	0.726169
yip2	0.258799	0.173337	0.220278	0.335909	0.364579	0.443809	0.673101	0.801307	0.770424
CG5885	3.05477	5.39389	5.30064	4.17806	2.84565	2.44855	2.73965	2.56264	2.88538
CG4598	0.315819	1.7854	2.22657	1.44138	0.776314	0.476554	0.795713	0.772053	1.18467
CG4594	0.510664	0.475764	0.435968	0.447778	0.476088	0.312496	0.160055	0.198678	0.288084
CG4592	0.369571	0.171408	0.265156	0.128188	0.146155	0.279785	0.351541	0.201521	0.197013
CG42366	0	0	0	0	0	0	0	0	0
CG42367	0	0	0	0	0	0	0	0	0
Cpr30F	0.00468223	0	0	0	0	0	0	0	0
CG31712	0.619893	0.784995	0.759353	1.5026	1.74194	1.52985	1.00736	0.875831	0.65408
CR45007	0.0654824	0.00780844	0	0	0.00718576	0	0	0.00827032	0
Apf	0.757156	1.13012	1.51887	1.93367	1.60899	0.905749	0.355349	0.251007	0.272116
CG4619	0.0614828	0.23613	0.21929	0.299292	0.253374	0.19307	0.122062	0.191204	0.183279
CG5853	0.00730316	0	0	0	0	0	0.00788901	0.00347033	0.00248868
CR45949	0.0195678	0.0110554	0	0.0432316	0.0832042	0.00505327	0.014721	0.00511523	0
CG13126	0.280876	0.333862	0.279264	0.349708	0.300682	0.384254	0.201859	0.274991	0.231978
CG4709	0.253673	0.231652	0.193892	0.226952	0.24774	0.259688	0.16568	0.205209	0.227801
CG5846	0.227123	0.208309	0.298524	0.66558	0.478012	0.338264	0.183884	0.193267	0.190449
CG4658	0.471639	0.763519	0.942234	1.16	1.43164	1.11225	1.18144	0.947646	0.635525
CG5850	0.131716	0.124454	0.0579954	0.116211	0.118733	0.146991	0.0358159	0.0618017	0.0778582
CR43683	0	0	0	0	0	0	0	0	0
Dref	0.476309	0.797506	0.75984	0.752185	0.551616	0.500721	0.299863	0.259948	0.244435
RpL13	27.9844	19.0535	17.6393	17.3597	17.9941	20.626	29.9012	33.8508	31.5522
CR13130	0	0	0	0	0	0	0	0	0
bib	0.00528005	0.0339474	0.0190353	0.0650911	0.0589158	0	0.0109667	0	0.00280535
CG31875	0.244993	0.0206989	0.0106923	0.0882041	0.115591	0.120655	0.0574344	0.0716673	0.0668882
SoYb	0.325431	0.376377	0.500442	0.794787	0.700511	0.511343	0.323153	0.273687	0.263964
CG4747	1.13576	1.14988	1.05459	0.948758	1.15535	1.43078	1.42478	1.29572	2.21907
Trp1	1.3182	2.78158	4.26966	4.22146	2.90239	2.22764	1.23428	0.858898	0.937043
obst-B	0	0	0	0	0.0270647	0.0389847	0.0304007	0.0383502	0.149862
Pen	4.86534	1.46145	0.647367	0.812606	1.30871	1.28762	1.61663	1.84816	3.87403
Spn31A	0	0	0	0	0.00769944	0	0	0.00140055	0.00183109
CG4839	0	0	0	0	0	0	0.00346783	0	0
Sur	0	0	0	0	0	0.0216472	0	0	0.00379737
CG31874	0	0	0	0	0	0	0	0	0
Ripalpha	0.437442	0.627477	0.758651	0.617475	0.810207	1.1037	0.543396	0.464969	0.220118
RpL7	56.4101	50.6773	53.1133	54.7452	58.5872	61.0377	70.3147	66.8681	62.132
CG34159	2.47161	2.76962	2.23744	1.05166	1.09442	1.7004	1.22567	1.34499	1.27563
CG5734	0.747299	0.671711	0.415361	0.388451	0.392958	0.434084	0.30463	0.479771	0.688316
CG5731	0.0282736	0.0161102	0.015548	0.00413308	0.0607885	0.0109464	0.017504	0.00653593	0.00339611
CR44845	0.0153827	0.00176676	0.00924117	0.0350801	0.104799	0.069819	0.0714197	0.0399583	0.00087493
CG5727	0.464778	0.445268	0.545645	0.733457	0.612878	0.458157	0.31347	0.191128	0.138574
CG4901	0.0793344	0.178404	0.12905	0.21014	0.266933	0.145864	0.151347	0.160624	0.186869
Npc1a	0.194242	0.115928	0.138387	0.130071	0.165194	0.132017	0.0644294	0.0389444	0.0267332
Prosalpha6	3.39645	3.24482	1.93419	1.93688	1.66458	1.97239	1.606	2.15497	3.96225
CG4908	0.276846	0.474986	0.515591	0.690082	0.624792	0.515505	0.424058	0.312878	0.424627
CG5708	1.26761	1.31356	1.64124	1.30835	0.966134	0.725588	0.4865	0.395414	0.336787
CG5694	0.666105	1.2069	1.44189	1.56526	1.5255	1.38882	0.781057	0.633181	0.675407
eEF1delta	10.6362	8.34488	7.92796	7.11098	5.30257	6.23777	6.60002	8.33008	12.4931
mthl15	0.0278309	0.00580954	0	0.00877916	0.0577759	0.0240275	0	0	0.0102402
me31B	3.13393	3.49109	2.22156	2.46201	2.65993	3.27451	3.3199	3.2767	10.6766
chico	0.147635	0.152062	0.0840542	0.127045	0.105658	0.194744	0.163408	0.0784375	0.105654
bsk	0.640496	1.08594	1.36332	0.639322	0.620258	0.278941	0.236421	0.0424908	0.102156
CG31717	0.541842	0.854242	0.846507	0.95791	0.778078	0.842143	0.53232	0.39333	0.374982
Ror	0.0655218	0.0602954	0.0632166	0.0421877	0.0315744	0	0.0114814	0	0
CG5676	5.56853	6.58591	7.47411	5.40424	2.40422	1.90053	1.53047	1.38402	1.58024
Pten	0.264836	0.592078	0.35394	0.279118	0.308696	0.278564	0.234421	0.207875	0.349681
Rsf1	2.0292	2.35071	1.55201	1.9062	1.62253	1.373	1.20394	0.910584	0.760787
REPTOR-BP	1.18463	1.52158	1.90342	2.72796	2.73307	1.82711	0.749337	0.394406	0.169204
Mob3	0.759014	0.945912	0.70146	0.637978	0.721663	0.718189	0.39173	0.251437	0.338207
CG4953	0.331557	0.212319	0.365385	0.39795	0.425449	0.257344	0.157062	0.114949	0.143908
CG4957	0.214221	0.380036	0.50021	0.503574	0.32561	0.366534	0.374968	0.381702	0.451935
Mulk	0.570346	0.576474	0.713849	0.846641	0.693814	0.689766	0.599016	0.701919	0.768625
trk	0.347756	0.183929	0.147506	0.240152	0.26666	0.378724	0.385147	0.401722	0.175766
Utx	0.35376	0.480013	0.480908	0.344237	0.447319	0.260825	0.22856	0.176042	0.192618
CG34043	0	0	0	0	0.00923133	0.0029117	0	0	0
Ufd4	0.341702	0.729516	0.548293	0.801736	1.04203	0.803799	0.559395	0.480707	0.570058
CYLD	0.141215	0.176591	0.174536	0.169804	0.262932	0.147681	0.0773379	0.0928725	0.0579647
CG13138	0.00394219	0.00204044	0.00313392	0.00231487	0.0144144	0	0	0	0
nmd	1.12964	1.44935	1.12512	1.09988	1.05429	1.22971	1.29345	1.39802	1.47581
CG5390	0.16927	0.18065	0.217061	0.38188	0.683505	0.536192	0.211602	0.198605	0.117139
CG4968	2.57778	2.83624	2.34247	2.93763	2.57327	2.2222	1.4155	1.32215	1.09794
Cdk5alpha	0.0575752	0.0141983	0	0.00462047	0	0.00260122	0.00491731	0.00871346	0.00800948
l(2)SH0834	0.673436	0.451112	0.252963	0.452911	0.497334	0.445797	0.394039	0.290612	0.547702
Usp14	2.8337	2.61822	2.69585	2.1104	1.78949	1.44684	1.0086	1.01636	1.16642
CG4972	0.262213	0.418625	0.250701	0.411149	0.320165	0.401826	0.389367	0.445446	0.335283
CG5381	0.00845884	0.0116279	0.0132366	0.0416348	0.0969897	0.0978993	0.101927	0.0530388	0.00306702
CG4995	0.0145402	0.0044812	0	0	0	0	0	0.00127423	0
RnrL	1.23287	1.51634	1.16946	0.227099	0.234376	0.204152	0.502756	1.11266	0.49786
Schip1	0.0328562	0.0427026	0.0355093	0.0422122	0.0656685	0.0161074	0.0127175	0.0154233	0
CG5037	0.361157	0.395236	0.491354	0.484011	0.636631	0.629643	0.390961	0.381117	0.657504
GATAd	0.115348	0.238316	0.352492	0.272866	0.301548	0.225669	0.109309	0.104622	0.120655
SamDC	0.745648	0.92475	0.729826	0.77281	0.911143	0.760461	0.441402	0.383478	0.323204
CG31715	1.72836	2.73426	1.97851	1.34001	0.747081	0.768515	0.528027	0.312191	0.633181
Sps2	0.214114	0.215554	0.28305	0.304879	0.271619	0.292189	0.259914	0.26219	0.261219
CG5022	0.025825	0.0124665	0.0145392	0.0400776	0.0386383	0.0125437	0.024842	0.00556497	0
CG34367	0.0224494	0	0	0.0129449	0	0	0	0	0
CG5367	0.0325316	0.0225253	0	0.0336531	0.0268821	0.0534918	0.0701984	0.0219204	0.0323522
CG5045	2.39084	1.91083	2.38372	2.25301	1.8993	1.41545	1.37499	1.53533	1.5593
Cand1	0.405189	0.354266	0.458547	0.386441	0.399543	0.190997	0.211651	0.197326	0.270489
pim	0.666994	0.997921	0.945479	0.801758	0.490551	0.581048	0.434346	0.307623	0.187244
lft	0.00413737	0.00437643	0	0	0.00858436	0	0	0.00127423	0.00280535
CG5056	0.495017	0.778866	1.05847	1.07935	1.16689	0.830908	0.472342	0.418566	0.509606
rho-5	0.0545688	0.0104337	0.0614405	0.0345911	0.0579686	0.0617058	0.0119263	0.0214671	0.00714732
CG33303	1.36092	2.27385	1.68067	1.38399	0.958685	0.963999	1.02381	1.20567	1.33781
dpr19	0	0.0195392	0.0366533	0.0929054	0.269479	0.127023	0.0490626	0.0167317	0.00674147
gny	0.245242	0.261351	0.163966	0.226446	0.340979	0.178727	0.122754	0.150652	0.0865471
CG5096	0.00509068	0.00415292	0.00349574	0	0	0	0.00212092	0.00487699	0.025911
Cdk1	3.41919	4.80596	4.89206	3.31942	1.9401	1.80418	1.41023	1.65166	1.76088
mRpS7	1.02432	0.865865	0.883301	0.959444	0.985917	1.22102	0.893624	0.980157	1.56928
da	0.905354	0.954143	0.706904	0.822579	1.12141	1.23905	0.988139	0.635541	0.575286
CR45789	0	0.00905994	0	0	0	0	0	0.011443	0
Mdh1	2.98636	3.04202	2.93546	7.48072	10.9857	7.90278	6.33331	7.09442	9.23535
Cnot4	0.666434	0.765161	0.915544	0.94958	1.06943	0.782858	0.674139	0.434423	0.393719
Ir31a	0.00906796	0.0076666	0.00633663	0	0	0.00941327	0.0172365	0.0100251	0.00246351
RpS27A	70.0156	56.4225	60.6266	61.4811	64.6074	63.2026	71.5063	76.5179	79.6155
Ip259	3.36847	3.22229	3.79645	4.49771	4.2138	2.95764	3.22616	3.37977	3.94797
CG5355	1.44955	1.25101	0.966707	0.914898	0.70487	0.732375	0.607014	0.974398	0.80607
Klp31E	0.0717999	0.118076	0.0467643	0.118093	0.133826	0.0624188	0.0496796	0.0729372	0.0691048
RfC3	1.37756	1.74417	1.39502	0.976994	1.03262	0.837189	0.527067	0.556958	0.598806
pie	0.149255	0.112782	0.0420561	0.0701276	0.0871494	0.103331	0.0992356	0.121675	0.0746225
CG5168	1.75877	1.45263	1.47184	1.51289	1.22311	1.18346	0.930771	0.933586	0.942302
SmB	7.39176	8.28215	6.3689	5.1857	3.57046	3.86424	3.96055	4.16317	6.55282
KdelR	1.71408	3.14767	2.27877	1.43883	1.41986	1.78104	1.50524	1.45864	1.74826
CG5188	0.203902	0.272587	0.123503	0.402288	0.339192	0.409164	0.268745	0.246475	0.22647
Bug22	1.18058	0.937236	0.53448	0.692215	0.60964	0.634651	0.460006	0.606966	0.709557
TfIIB	0.723306	0.576338	0.539003	0.760271	0.638517	0.73283	0.387161	0.385636	0.433588
TBC1D16	0.0632693	0.0830066	0.062024	0.0337471	0.0221046	0.0637652	0.0446585	0.0292276	0.0261926
holn1	0.588004	0.701752	0.487276	0.584686	0.528851	0.477709	0.3336	0.25053	0.306975
STUB1	0.860512	0.912328	0.753203	0.860259	0.89116	0.601817	0.437881	0.374035	0.439967
Nse4	0.505385	0.679315	0.53059	0.724501	0.67075	0.568428	0.220011	0.212733	0.217045
loh	0.0131644	0.0312196	0.00554957	0.0170751	0.0391083	0.018832	0.00774935	0.0217267	0
ppk10	0	0.00127948	0	0	0.00705876	0	0.0151271	0	0
LManI	0.0651701	0	0.0130105	0.00183421	0.0138231	0.0167669	0.0516566	0.0265134	0
LManII	0.0744658	0.0270139	0.0092068	0.0657897	0.105028	0.191445	0.160217	0.151428	0.0800036
RluA-1	0	0.0171794	0.0102665	0.0105478	0	0	0	0	0
RluA-2	0.185905	0.116992	0.0984072	0.197409	0.233973	0.357769	0.208136	0.192672	0.0896508
Grip75	0.478241	0.341061	0.286242	0.228784	0.219312	0.222012	0.146021	0.223552	0.160964
CG7456	0.306557	0.527721	0.430609	0.369139	0.289619	0.359086	0.202082	0.205485	0.153661
CG6144	0.478947	0.343587	0.373714	0.551885	0.409661	0.600036	0.381939	0.45603	0.542954
CG13144	0	0	0	0	0	0	0	0	0
Myo31DF	0.152861	0.22782	0.251239	0.201756	0.201179	0.226854	0.175669	0.20075	0.148922
CR44224	0	0	0	0	0	0	0	0	0
CG6094	0.586963	0.516765	0.540177	0.539453	0.509468	0.667962	0.554373	0.508501	0.759265
CG7384	0.0372272	0.00337398	0	0.0153599	0.121152	0.267528	0.353137	0.326298	0.441141
Fatp	0.2066	0.258894	0.18726	0.316072	0.397982	0.233882	0.120076	0.14785	0.0844716
Lrr47	0.383147	0.536251	0.442349	0.550944	0.552913	0.510839	0.317968	0.164952	0.197452
Lip4	0	0	0	0.0337221	0	0	0	0.0103895	0.0142069
Trim9	0.0045814	0	0	0	0.00958346	0	0	0	0.00395929
CG17098	0	0	0	0	0.0136058	0	0	0	0
CG7299	0.0323617	0.0254461	0	0	0	0	0	0	0
CG7296	0	0	0	0	0	0	0	0	0
CG7294	0	0	0	0	0	0	0.00937171	0	0
CG17108	0	0	0	0	0	0.003621	0	0	0.00341534
CG6443	0.466634	0.491657	0.585815	0.644878	0.516	0.445929	0.193886	0.135652	0.221605
CG17118	0.0357664	0.0215122	0.0137648	0.00904466	0	0.0321102	0.0145152	0.0071091	0.0114699
EMC3	1.06105	1.46748	1.3592	1.49992	1.0083	1.12852	0.76222	0.674999	1.2303
Dpy-30L1	1.55262	2.07246	2.3019	2.22644	1.57011	1.31355	0.816713	0.675766	0.663336
Nup107	1.05397	1.34296	1.0423	0.947909	1.01022	0.864079	1.06034	1.05632	1.027
Vha16-5	0.0341422	0.0929866	0.0874098	0.0663878	0.0773329	0.0146533	0.00285984	0	0.0063285
CG12299	0.214626	0.279419	0.264604	0.268565	0.268076	0.181343	0.161907	0.178739	0.109231
CG6729	0.275888	0.425999	0.38654	0.500998	0.310391	0.236784	0.217329	0.192173	0.156518
CG17124	0	0.0352271	0.0425316	0.0289605	0.0277857	0.01498	0.0342418	0.0139935	0.0356356
CG6495	0.0295066	0	0	0	0	0	0	0.00677248	0
Ubc2	1.71797	1.48701	0.595824	0.712595	0.929009	0.629222	0.415833	0.488973	0.547117
CG6724	0.951661	1.00129	0.824163	1.03584	0.709422	0.899765	0.926202	0.957038	1.20633
CG17127	0	0	0.00633663	0	0	0.00810207	0.00315972	0	0
CG31869	0	0	0.00769607	0	0.0247669	0	0.0079894	0.00131245	0
CR44582	0	0	0	0	0	0	0	0	0
CR44581	0	0	0	0	0	0	0	0	0
Nos	0.0149035	0.00613142	0	0	0	0	0	0	0.00213713
CG6700	0.221824	0.49563	0.329314	0.36655	0.643524	0.516359	0.463235	0.31514	0.168819
Porin2	0.0191158	0	0.0160184	0	0.0275606	0.00994244	0	0.00691878	0.0112023
porin	16.6934	13.6481	15.5846	15.2519	13.5602	14.1163	15.0611	17.4032	18.2307
SmydA-3	0.0470092	0.0231521	0.0126789	0.0276727	0.0847657	0.0506063	0.0311186	0.028533	0.00934608
Dnz1	0.377849	0.246685	0.237375	0.308501	0.27158	0.295259	0.258003	0.217743	0.43273
aurB	1.99434	3.62761	2.00781	1.26496	1.12756	1.26614	0.933827	0.93596	0.493072
Stam	0.156128	0.31594	0.36171	0.424018	0.380587	0.439117	0.185947	0.162223	0.0905689
CG14072	0.390029	0.145618	0.0291265	0.0678276	0.0250254	0.0237875	0.0855995	0.00660336	0
CG33129	1.93692	1.98831	1.20089	0.987999	1.18078	1.384	1.33685	1.40982	2.31463
YL-1	0.590181	1.13406	1.04694	0.762641	0.876413	0.77572	0.633415	0.374513	0.334007
CG16743	0	0	0	0.00341615	0	0.00448183	0	0	0
abo	0.201207	0.142858	0.0582366	0.145565	0.157238	0.156511	0.161471	0.10565	0.0904383
ATPsynG	12.0953	11.8789	12.8602	9.60267	7.8255	7.26266	7.14731	8.37252	10.8356
SCAR	0.488185	1.20337	0.80998	0.450438	0.816195	0.827264	1.13287	1.05057	0.594721
piwi	1.54944	1.25721	1.31503	2.48666	3.16609	2.79661	1.8809	1.76259	0.561851
CG12253	0.314421	0.31699	0.220533	0.24777	0.205262	0.334814	0.17813	0.186256	0.138351
CG16833	0.185549	0.258937	0.163294	0.18914	0.190326	0.2724	0.1703	0.238137	0.289859
aub	2.73372	2.68181	1.59763	1.99461	2.68384	2.45108	1.65268	1.98568	1.68129
lectin-33A	0.0444503	0.0251719	0.0338409	0.0635615	0.0621351	0.0449982	0.0264634	0.0613967	0.0679741
RpL9	28.2835	28.0141	30.3825	30.7924	29.3933	31.3272	41.7345	42.9965	36.1158
Nup154	0.454975	0.460802	0.446718	0.241783	0.315072	0.337896	0.305382	0.336897	0.357457
Art8	0.786943	0.854593	0.687354	0.797282	0.606655	0.778577	0.554674	0.674185	0.62381
CR45778	0.00487417	0.00419149	0.00656249	0.0263149	0	0	0.00591223	0.00733742	0
dUTPase	17.9215	18.4642	17.5482	10.0142	5.32924	3.79905	4.60123	7.64462	7.01738
Samuel	0.200943	0.103849	0.18511	0.242663	0.332975	0.532887	0.657685	0.297638	0.261893
CG14915	0	0	0	0	0	0	0	0	0
AstC	0	0	0	0	0	0	0	0	0
AstCC	0	0	0	0	0	0	0	0	0
Wdr59	0.0715469	0.102682	0.103524	0.17098	0.178463	0.228283	0.120484	0.123408	0.0852632
Ge-1	0.242691	0.398639	0.302613	0.346634	0.444935	0.34209	0.287866	0.201328	0.156669
Reps	0.503041	0.851957	0.634879	0.85724	0.92847	0.569173	0.317547	0.293808	0.286726
l(2)gd1	0.0823448	0.19006	0.171743	0.179884	0.198884	0.14923	0.165492	0.118386	0.0918339
CG6201	0	0.00723342	0	0	0.024342	0	0.0147888	0.0374574	0.0268442
CG6230	0.133618	0.16346	0.233653	0.105971	0.205213	0.117145	0.11154	0.151231	0.155561
CG14921	0.0127174	0.0164639	0.0128126	0	0.0173563	0.0104695	0.0113624	0.0224618	0.010488
Csl4	0.845235	0.684021	0.498513	0.671806	0.643974	1.04725	1.78856	1.61425	1.73205
Nup160	0.181075	0.214701	0.0565322	0.140713	0.173174	0.140633	0.157228	0.177286	0.190492
RfC38	1.37521	2.46903	2.6924	1.22074	0.92902	1.0318	1.27976	1.43941	1.03826
CG4751	0.109127	0.313714	0.397248	0.23434	0.200268	0.118592	0.0687019	0.0489088	0.0504769
Gyc32E	0	0	0	0	0	0	0	0	0
CG6287	0.0890113	0.0746491	0.222926	0.794571	1.59459	2.65543	5.55461	6.94387	9.5228
Ca-beta	0	0	0.0555897	0.017661	0.135385	0.14215	0.125817	0.103972	0.00557318
Vm32E	0	0	0	0	0	0	0.00566387	0	0
CG4788	0.256882	0.364302	0.571688	0.618824	0.548901	0.3134	0.222173	0.17106	0.120183
CR43859	0	0	0	0	0	0	0	0	0
ab	0	0.0119014	0	0.0197798	0.1134	0.117692	0.0281399	0.011068	0.00730182
cmet	0.27455	0.73557	0.481957	0.44933	0.446846	0.316732	0.248375	0.132194	0.0706536
cana	0.194252	0.471913	0.344767	0.542676	0.561395	0.521092	0.466513	0.387554	0.352091
CG33695	0.781786	1.43406	1.58434	1.63272	1.07061	0.918157	0.71627	0.604324	0.428998
CR44182	0.0196071	0	0.0052794	0.00183421	0.00786882	0	0	0	0
Ppt2	0.0680468	0.115	0.109383	0.0285236	0.0568998	0.0507876	0.00768326	0.0355842	0.0793641
mre11	1.25173	1.36123	1.37948	1.03577	1.02263	0.938872	0.523719	0.610228	0.417296
salr	0	0	0	0.0032296	0.00632969	0	0	0	0
salm	0	0	0	0.0105478	0.00610158	0	0	0	0
CG43355	0	0	0	0	0	0	0	0	0.000880449
CG6488	0.180461	0.210053	0.260798	0.300848	0.20442	0.166079	0.0803957	0.0612493	0.10019
spz4	0	0	0	0	0	0	0	0	0
Dlg5	0.0720844	0.116604	0.232903	0.323727	0.409113	0.336292	0.344709	0.261419	0.195775
CG43153	0	0	0	0	0.0153335	0	0	0	0
CG31705	0.0592682	0.0438788	0.0231339	0.257839	0.525947	0.531188	0.297263	0.281495	0.234062
CG31706	0	0	0	0	0	0.0280863	0.0261617	0.0344469	0.00119555
CR44495	0.00602658	0	0	0	0	0	0	0.00576828	0.00557266
kek2	0	0	0	0	0.0462584	0	0	0	0
CR44143	0	0	0	0	0	0	0	0	0
CG14931	0.913796	0.651496	0.532243	0.754575	0.740261	0.669174	0.630762	0.397047	0.576501
CG14932	4.16475	2.88408	2.61882	2.65511	3.10189	1.48105	0.61	0.220971	0.0353704
CG14937	0.0137151	0.0196245	0.0639773	0.0125682	0.0744218	0.0182218	0	0.00486221	0.00092989
crol	2.64869	6.60115	6.42565	3.73253	3.9986	4.28854	3.51417	2.81209	1.51062
CycY	0.519815	0.885263	1.49813	0.743752	0.45356	0.47723	0.273414	0.299061	0.314304
Pde1c	0	0	0	0	0	0	0	0	0
esc	0.513278	0.895624	1.07612	0.457621	0.359627	0.387149	0.459922	0.44534	0.26692
CG31704	0	0	0	0	0	0	0	0	0
CG44008	0	0	0	0	0	0	0.00600817	0.0572295	0.00433482
Mal-B2	0	0	0	0	0	0.0151183	0.0406897	0.153091	0.135618
CG42751	0	0	0	0	0	0	0.00347928	0.00147209	0
CR43314	0.0221625	0.0290865	0.0193775	0.0286724	0.0808397	0.0409703	0.0506496	0.0704587	0.012437
CG6686	0.361065	0.70207	0.67822	0.66643	0.54873	0.6575	0.38855	0.305222	0.246397
CG34163	0.61916	0.528754	0.437274	0.487782	0.614839	0.711701	0.423478	0.578313	0.745208
zuc	0.541725	0.302124	0.164257	0.24213	0.331744	0.453613	0.322348	0.469581	0.329377
dgt2	1.20071	2.49868	2.54617	3.28004	2.34966	1.95472	1.37841	1.11101	0.878885
escl	0.0761228	0.070121	0.114365	0.0548579	0.0638183	0.0376329	0.0175001	0.0195156	0.0358885
Ada1-2	0.117262	0.0988947	0.0756238	0.081937	0.0532907	0.089748	0.00761527	0.0146956	0.00759749
CG18789	0.421228	0.330015	0.228644	0.242255	0.246098	0.220392	0.264742	0.135396	0.0507097
Qtzl	0.32498	0.251776	0.181816	0.180417	0.292966	0.221156	0.0871706	0.0704375	0.0882323
Ada1-1	0.117674	0.0900047	0.0673764	0.0585757	0.0812213	0.0770769	0.0129781	0.0212656	0.00905181
CG18787	0.527038	0.282647	0.268567	0.188153	0.161787	0.311811	0.217232	0.236177	0.171816
CG12264	1.28193	1.02092	1.00732	1.18497	0.938247	0.816651	0.676088	0.633158	0.735913
CG6746	0.847033	1.22751	1.07094	1.1783	1.00251	1.18987	0.855598	0.817394	0.696377
Rh5	0	0	0	0	0	0	0	0	0
CG6734	0.0587279	0.0535042	0.0377494	0.03013	0.0858669	0.0568933	0.066591	0.0828223	0.0134635
CR44587	0.0145402	0	0	0	0	0	0	0	0
dmGlut	0.100442	0.0651629	0.0765277	0.175093	0.402965	0.314628	0.250564	0.259424	0.326702
Tom70	0.619235	0.498519	0.256701	0.520713	0.471787	0.424393	0.270637	0.330326	0.37759
CG6766	0.301783	0.278198	0.221235	0.248598	0.1575	0.179364	0.130324	0.137895	0.171184
CR46070	0.0430875	0.0149825	0	0.0110304	0.0114347	0	0	0.00865431	0
CG6785	0.166728	0.0558739	0.14657	0.181579	0.282939	0.339401	0.190173	0.115808	0.0190571
CG6770	10.2391	5.60679	10.7413	32.2945	41.9901	27.7561	14.9125	9.95948	14.4919
CR44589	0	0.00337398	0.00505307	0.0276541	0.0963065	0.0217492	0.00651509	0	0
Plzf	0.0615363	0.077245	0.142881	0.139783	0.12324	0.149037	0.0986273	0.0202561	0.0151659
CG14945	0.0712521	0.0185696	0.0672481	0.0213194	0.0181383	0.0381624	0.00750058	0.0248615	0
JhI-21	0.317218	0.0975091	0.0969196	0.181712	0.303964	0.634357	0.590697	0.627498	0.596583
Rab3-GAP	0.0299624	0.116234	0.102361	0.124207	0.0778029	0.0371288	0.040545	0.0589115	0.022085
firl	0.0149035	0	0.0052794	0	0.0192872	0.00787783	0.00115624	0.00684136	0.000880449
prd	0	0	0	0	0	0	0	0	0
Pex19	1.5431	1.20957	0.90416	0.796715	0.763485	0.641626	0.585928	0.706512	1.15995
CG6712	0.850456	0.724796	0.66436	0.534788	0.592987	1.05455	0.999991	1.17843	1.44142
Mt2	0.149334	0.145761	0.328593	0.238464	0.244393	0.301865	0.232979	0.188835	0.173197
Ced-12	0.0403055	0.122633	0.144184	0.055366	0.100785	0.120833	0.116323	0.0886956	0.0457626
Patsas	0	0.0259678	0.0392274	0.0185401	0.00966248	0.00295209	0.0024952	0.0121108	0.0140318
ThrRS	1.86264	1.67351	1.5801	1.61629	1.41306	0.955666	0.779992	0.886664	1.1605
Rab6	1.20813	1.66711	1.72413	2.02294	1.61941	1.32492	0.814058	0.563076	0.69585
Phae1	0.0182732	0.00152379	0.014666	0.0231005	0.0499535	0.00315883	0	0.00417063	0.0153821
Phae2	0.018074	0	0.0044274	0.02065	0.0301959	0	0	0	0
CG17211	0	0	0	0	0	0	0.0011324	0	0
CG31760	0.0207702	0	0	0	0	0	0.0142816	0.014692	0
CG6583	0.236146	0.568053	0.338273	0.200749	0.312044	0.262532	0.176692	0.112129	0.131989
crok	0.287046	0.400171	0.369024	0.340043	0.461534	0.343365	0.369245	0.351999	0.431788
CR43356	0.423082	0.198022	0.137445	0.037468	0.0362684	0.00690955	0	0.00182719	0
bru1	5.86137	6.08364	6.4529	6.75665	15.7636	18.6774	18.3098	17.3832	12.3469
atilla	0	0	0	0	0	0	0.00679091	0	0
CG31759	0.0415406	0.0830413	0	0.103374	0.134014	0.15314	0.181634	0.204199	0.204007
CG31862	0	0	0	0	0	0	0	0	0
bru2	0	0.0284292	0.0116141	0.0189367	0	0.034058	0.0128246	0.0114103	0.0153819
Pkd2	0	0	0	0	0	0	0	0	0
vir-1	0.0206435	0	0	0	0.0448687	0.0775304	0.222768	0.443187	0.0827181
CG6405	0.203321	0.133666	0.130306	0.193223	0.413579	0.143558	0.00980434	0.00526037	0.00092989
CG5446	1.68117	1.86304	1.07996	0.818558	1.04986	1.45062	0.990757	1.01663	1.15346
CG6388	0.453316	0.374162	0.531428	0.576965	0.325184	0.415828	0.640717	0.748322	0.712478
CG5435	0	0	0.00819483	0	0.0154272	0	0	0	0
SC35	3.30995	4.42402	3.37297	4.35834	3.99947	4.39013	4.82367	4.31173	4.58075
eRF3	1.87778	1.86252	2.29636	2.31577	2.10683	2.07947	1.7486	1.69785	1.48277
Oatp33Ea	0	0.0121541	0	0	0	0	0.0117092	0	0
bun	1.76057	2.70002	4.02421	5.32749	5.23241	2.99769	1.83402	1.18455	0.687708
CR43051	0.00999357	0.0212016	0.107787	0.305833	0.128328	0.134479	0.0418495	0.133983	0.0729821
CR42746	0	0	0	0.0199967	0.121684	0.152051	0.0968171	0.0311007	0.0045348
nub	0	0	0	0.00711089	0	0	0	0	0
pdm2	0	0	0	0	0	0	0	0	0
CCT4	4.45477	3.52531	3.83416	3.83255	2.89301	3.5315	3.95614	4.75736	6.88926
CG6153	0.393683	0.510875	0.472748	0.54466	0.489799	0.49147	0.339382	0.387997	0.314725
CG5780	0.192828	0.315013	0.399854	0.671085	0.481343	0.546667	0.411454	0.323201	0.170425
PICK1	0.138629	0.147503	0.160394	0.219389	0.159327	0.147906	0.0938817	0.0424252	0.0114627
CG17036	0.0114405	0.0377398	0.0187963	0.032376	0.147286	0.11009	0.122411	0.125214	0.082483
CG5776	0.0804204	0.121744	0.133488	0.0601377	0.060936	0.167954	0.185	0.180284	0.313412
spict	0.603973	0.914284	0.946016	0.998447	1.03875	0.879128	0.503087	0.431	0.296082
CG15484	0.573383	0.170803	0.0381632	0.0152103	0.0590016	0.0127371	0.0172843	0.0192101	0.0147922
CG6180	4.96007	5.58192	6.08985	6.06059	4.46722	3.2853	3.24582	3.37376	3.41985
CG5787	0.456058	0.462035	0.295599	0.291324	0.296939	0.380278	0.353778	0.465802	0.427976
Pih1D1	0.683811	1.03685	0.861629	0.882648	0.998358	0.853019	0.745075	0.597881	0.846795
MRP	0.171191	0.348194	0.250589	0.320933	0.305165	0.255096	0.34729	0.344575	0.376691
CR43818	0	0.0026317	0	0	0	0	0	0	0
kek1	0.0164053	0.0963563	0.140014	0.615148	0.874736	1.14017	0.779648	0.500834	0.142947
CR44970	0	0.00264433	0	0	0	0	0	0	0
CR44971	0	0	0	0	0	0	0	0	0
Vha68-2	1.45119	0.687967	0.636875	0.850663	1.01529	1.2206	0.985414	1.16332	1.89745
Vha68-3	0.0131014	0.0089624	0.0150481	0	0.00574207	0.00988819	0	0	0
CG12404	0.502508	0.693655	0.607923	0.950547	1.05183	1.05052	0.63131	0.387792	0.315847
Vha68-1	0.132024	0.366373	0.298061	0.192816	0.308614	0.136768	0.00991611	0.00596051	0.00530012
Tor	0.190238	0.234442	0.217468	0.225751	0.219631	0.0883652	0.145371	0.117895	0.113624
CG9934	0.208022	0.505544	0.420621	0.554803	0.456847	0.331909	0.24445	0.251756	0.191359
A16	1.21354	1.84626	2.01344	1.92005	1.77914	1.52672	0.939046	0.836467	0.498563
CG9932	0	0.0371401	0.024567	0.0314798	0.199323	0.0894304	0.0377232	0.0326358	0.0287401
CR44197	0	0	0	0	0	0	0	0	0
CG5142	0	0	0	0	0	0	0	0	0
DnaJ-H	0.248113	0.412704	0.436402	0.478364	0.416193	0.464645	0.247859	0.276152	0.277296
Sirt1	0.630372	0.874253	0.759259	0.801912	1.00634	1.14757	1.09194	0.630218	0.331554
Sfmbt	0.0668011	0.201196	0.158511	0.157886	0.177374	0.151418	0.146425	0.102389	0.120538
CR46256	0	0	0	0	0	0	0	0	0
CG43925	0.0229673	0.0125713	0.0152112	0.0128286	0.0135763	0.0414358	0.00709214	0.00360069	0.000875046
CG5439	0.71222	0.536835	0.488113	0.534349	0.451741	0.412669	0.410925	0.330898	0.375503
CG5287	0.09246	0.16279	0.169608	0.238295	0.238942	0.118569	0.11526	0.0610109	0.0717127
CG31849	0.103749	0.146614	0.0889765	0.0800407	0.0734122	0.0822123	0.0729376	0.0708504	0.0293536
CG5458	0.0118198	0.0370885	0.0280174	0.0173481	0.0197059	0.00588732	0.00713842	0	0.00667993
CG16974	0.275873	0.309922	0.294112	0.343848	0.343042	0.321536	0.169271	0.205955	0.190668
Edem2	0.0999018	0.235655	0.182314	0.129432	0.0747632	0.12821	0.151643	0.124504	0.100411
CG16972	0.0903181	0.181803	0.185242	0.218509	0.255155	0.163586	0.100372	0.028549	0.0836088
Pect	0.421334	0.331196	0.146476	0.251875	0.377977	0.385987	0.283839	0.442915	0.512767
CG15482	0.0100939	0.00318368	0	0.0255431	0	0.00656038	0.00158847	0.00646069	0
snRNA:U2:34ABa	0.0398395	0.0140402	0	0	0	0	0	0	0.00119555
kek4	0	0.00118084	0	0	0	0.0501935	0.129277	0.0474599	0.0276703
CG9426	0.17152	0.259004	0.129379	0.12588	0.179245	0.1748	0.178121	0.14394	0.248351
mRF1	0.109618	0.235066	0.112168	0.151476	0.233948	0.218286	0.176001	0.176208	0.255927
Ski6	0.843223	1.13038	1.0751	1.18149	0.741478	0.990734	1.06466	1.15308	1.54097
CG16812	0.964447	0.822399	0.416044	0.658302	0.538036	0.935143	0.544369	0.446484	0.289829
CG16813	0	0	0	0	0	0	0	0	0
CG16820	0	0	0.00535971	0	0	0	0	0	0
CG44085	0	0.00448154	0	0	0.0273971	0.0108001	0.0522155	0.00901169	0.0108095
Drep4	0.251646	0.231804	0.20695	0.287802	0.415641	0.489439	0.232525	0.256355	0.250134
CR44083	0	0	0	0.00479032	0	0	0	0	0
Uvrag	0.200924	0.288726	0.381453	0.269447	0.23627	0.204241	0.122863	0.0792113	0.145791
CR44972	0	0	0	0	0	0	0	0	0
CG31729	0.192834	0.228853	0.203432	0.136233	0.212711	0.142256	0.110285	0.0770998	0.0614579
Nnp-1	0.977055	1.16127	0.791151	1.01113	0.985289	1.57601	1.83023	1.79209	2.06701
CG6523	2.56962	3.43725	2.87173	2.62607	2.16638	1.85979	1.90797	2.18778	2.49745
Tap42	0.469868	0.214955	0.360444	0.453966	0.533356	0.375008	0.258287	0.28008	0.211134
CG31855	0.876572	0.978743	1.13653	0.927037	1.14801	1.36446	1.03054	0.901914	0.945056
ND-B22	5.26536	5.90035	6.93776	6.68087	6.02272	4.93977	2.87916	2.96759	4.04008
CG9305	0.427321	0.387174	0.370515	0.318854	0.305519	0.386337	0.261277	0.336766	0.12052
CG6565	0.124516	0.322347	0.34535	0.233108	0.295956	0.326311	0.356002	0.36064	0.519837
CG9302	0.146343	0.403403	0.359777	0.243825	0.207532	0.29745	0.300964	0.249068	0.376888
beta'COP	0.846689	0.586926	0.45385	0.377318	0.376032	0.534487	0.479168	0.39597	0.548744
loqs	0.308796	0.167656	0.14596	0.243832	0.194586	0.301078	0.173784	0.09972	0.12387
CR44599	0.0508996	0.00385892	0.0122337	0.0259598	0.0167674	0.0680561	0.0872462	0.182671	0.151782
Ing5	0.948106	1.14094	1.39515	1.61975	1.27378	1.1387	0.518636	0.353338	0.256618
CG7099	0.0809423	0.0537949	0.0438035	0.13352	0.188295	0.157786	0.0694453	0.0278147	0.0266973
RpL24	53.5027	37.0661	37.7714	34.043	34.0718	35.7159	42.8563	44.8819	37.3799
CG16957	0.0659887	0.00966719	0.02113	0.0207933	0.00522812	0	0.0148866	0	0.00344298
CG10859	0.0789182	0.0148611	0.00255523	0	0	0	0	0.00140055	0
CR44600	0.00468223	0	0	0	0	0	0	0.00525652	0
CG7110	0.415664	0.538207	0.429936	0.37748	0.617194	0.599258	0.585292	0.406664	0.262338
Vm34Ca	0.0501463	0.0926681	0.151537	0.170799	0.226467	0.0846638	0.130272	0.0569865	0.156095
CG16848	0.00481081	0.00337398	0	0	0	0	0	0	0
CG16956	0	0	0	0	0	0	0	0	0
CR45683	0	0.0012124	0	0	0	0	0	0.00651366	0.00920668
CG9267	0.333921	0.422145	0.325612	0.620739	0.455536	0.684228	0.516191	0.56312	0.407273
B4	0.193886	0.538957	0.434865	0.249759	0.382991	0.286187	0.300111	0.261323	0.125569
CG15638	0	0	0	0	0	0	0	0	0
CG9263	0	0	0	0.0116497	0	0	0	0	0
kuz	1.12025	1.71133	1.21591	1.14494	0.912069	0.906084	0.646174	0.403691	0.347046
ics	0.958562	0.788244	0.513435	0.987962	0.715489	0.822993	0.574313	0.482133	0.464228
CG18507	0	0	0	0.0166222	0.0773913	0.080801	0.161241	0.0901513	0.0231816
TM9SF4	0.343925	0.670426	0.457189	0.375968	0.377703	0.435199	0.312895	0.283707	0.196701
CG9008	0.201339	0.0556184	0.0341454	0.0871525	0.183125	0.0983121	0.0629728	0.166517	0.125959
p38b	0.345121	0.583391	0.475949	0.323843	0.189851	0.364458	0.331323	0.264557	0.6265
CG16890	0.228511	0.203266	0.125834	0.136985	0.23779	0.214799	0.182149	0.106765	0.0804057
CG31731	0.0877739	0.0905637	0.0665601	0.110193	0.0601082	0.0739311	0.0953013	0.0724674	0.0369051
CG16863	0.0474039	0.0431002	0.108427	0.0975994	0.0540512	0.0345428	0.0146003	0.0112002	0.00578338
Sec71	0.0195836	0.049615	0.0226425	0.0290946	0.0416483	0.0486225	0.0196728	0.0347421	0.0452582
CAH1	0	0.000968654	0.00529918	0	0	0.00242772	0	0.0106284	0.00153362
Adat1	0.0355831	0.0517586	0.0901822	0.0923266	0.196961	0.0580019	0.103408	0.0651076	0.0421153
CG16865	0.346885	0.480922	0.478976	0.565586	0.600652	0.608134	0.280626	0.189755	0.243325
CG16888	0.115303	0.136631	0.103939	0.0912031	0.0499571	0.0549719	0.00943775	0	0
Sos	0.0523712	0.181463	0.119247	0.125359	0.090994	0.179086	0.115781	0.0575294	0.0362063
b	0.0397548	0.0187225	0	0.0185368	0.0820616	0.0248789	0	0.00518769	0.00183109
tam	0.360529	0.313928	0.27425	0.403301	0.233511	0.191928	0.14062	0.147724	0.168334
Arpc1	1.47815	1.45916	1.06144	0.965004	0.565108	0.456779	0.394849	0.390656	0.541544
Orc5	0.354692	0.571715	0.657933	0.4107	0.452431	0.26859	0.162483	0.122718	0.137615
RpII33	1.32798	1.64579	2.18329	1.94254	1.20268	1.23376	0.901884	0.919896	0.967155
mRpS23	1.14414	1.40203	1.48534	1.37091	0.947021	1.26291	1.01325	0.816771	1.18772
CenG1A	0.0527922	0.0508429	0.0396986	0.069445	0.105821	0.0923717	0.0660308	0.0921543	0.0240007
CG7916	0	0	0.0113752	0.00183421	0.00474574	0.0224039	0.00400311	0	0
Smg5	0.233965	0.321337	0.23202	0.36453	0.250018	0.337569	0.261336	0.200736	0.13332
Ance	0	0	0	0	0.00574207	0.0029117	0	0	0
NimA	0	0	0	0	0	0	0.00679091	0	0
NimB2	0	0	0	0	0	0	0	0	0
bgm	0.148441	0.016557	0.180167	0.451154	0.736325	0.712752	0.759159	0.558252	0.407182
NimC3	0.0145402	0	0	0	0	0	0.00315972	0	0
hll	0	0	0	0	0.0153335	0	0	0.00429638	0
CG43332	0	0	0	0	0	0	0	0	0
Dyrk2	0.355855	0.46963	0.262102	0.405141	0.490561	0.38217	0.325936	0.261564	0.0880203
CR44727	0.0250971	0	0	0.0020185	0	0	0	0	0
CR44728	0	0	0	0	0	0	0	0	0
wb	0.0593958	0.0307187	0	0.0871308	0.0919847	0.0212552	0.0532045	0.00556497	0.00544136
CR44729	0.017657	0.00796511	0	0	0	0	0	0	0
CG32971	1.29131	0.670965	0.384164	0.0906045	0.0630449	0.0089501	0.00706917	0.0243603	0.00393783
ms(2)34Fe	0	0	0	0	0	0	0	0	0
CG33090	0.0473036	0.0687904	0.029754	0.09021	0.145046	0.0727254	0.0527132	0.0929509	0.131328
Send2	0.00563773	0	0.00535971	0	0	0	0.00724182	0	0
mTTF	0.412712	0.454114	0.491436	0.447955	0.397705	0.454233	0.355036	0.338683	0.263272
l(2)34Fc	0	0	0	0	0	0	0	0	0
l(2)34Fd	0.380021	0.316318	0.498239	0.523915	0.542443	0.85659	0.778815	0.724874	0.60664
Rab14	1.12489	1.08536	1.16439	1.66108	1.87246	1.40143	1.07241	0.736072	0.941787
CR44851	0	0	0	0	0	0	0	0	0
Pgant35A	0.211978	0.174829	0.2124	0.206111	0.24008	0.187552	0.137645	0.14483	0.159799
CR43463	0.0133064	0.000968654	0.0163302	0.00522018	0.0126791	0	0.0129809	0	0
spel1	0.380949	0.365742	0.430326	0.320566	0.625626	0.459124	0.393842	0.403796	0.143708
elB	0	0.0104513	0.00349574	0.0827265	0.0288854	0.0154992	0.0242866	0.00670347	0.010766
CR44733	0	0	0	0	0	0	0	0	0
noc	0	0.0146924	0.0489861	0.00800383	0.020072	0.0200615	0.00762475	0.018628	0.0192892
CR45693	0	0	0	0	0	0	0	0	0
CG33648	0	0	0	0	0	0	0	0	0
osp	0.0446985	0.0977887	0.167548	0.247011	0.280878	0.331061	0.187285	0.229801	0.134528
CG34166	0	0	0	0	0	0	0	0	0
CG42681	0	0	0	0	0	0	0.00506906	0	0
CG42587	0	0	0	0	0	0	0.00346783	0	0
CR45458	0	0	0	0	0	0	0	0	0
mol	0	0.0181274	0.124393	0.332368	0.72163	0.825247	0.560935	0.484	0.402957
DCTN5-p25	0.638132	0.591314	0.739317	0.553932	0.441257	0.3402	0.229048	0.248886	0.178852
l(2)35Be	0.953551	1.0484	1.00364	1.20655	0.829534	0.978475	0.532038	0.385368	0.522543
NC2beta	1.04806	1.29538	1.40541	1.55756	1.15367	1.06572	0.627351	0.471546	0.320155
THG	0.142976	0.282231	0.272817	0.378891	0.201722	0.307709	0.171383	0.22407	0.241315
l(2)35Bd	0.114965	0.139689	0.15445	0.150077	0.227956	0.123698	0.157372	0.126347	0.318193
GABA-B-R1	0	0.00497732	0.00491486	0.0521577	0.180049	0.0315193	0	0	0
yellow-c	0	0.00485671	0	0.0125179	0.0253228	0.057087	0.0175527	0.0114867	0.00185617
CIAPIN1	0.726017	0.848223	1.25068	1.35129	1.56145	1.33597	0.902763	0.901955	0.684417
Su(H)	0.168952	0.338209	0.266709	0.198408	0.246999	0.289951	0.163423	0.195684	0.141058
ck	0.0867299	0.207897	0.144032	0.171997	0.215084	0.205901	0.154104	0.100535	0.0666619
CG33679	0	0.00880139	0	0	0	0.0148953	0.00918878	0	0
TfIIS	2.2095	2.36829	2.31828	2.60684	1.90334	1.70274	1.51641	1.29138	1.47423
solo	0.324838	0.657215	0.702211	0.564309	0.318126	0.323663	0.272549	0.301896	0.0273568
vas	4.95022	2.50806	1.89097	2.56238	2.48544	2.8865	1.50292	2.32799	1.34349
vig	0	0.127195	0.153684	0.262513	0.14362	0.339364	0.242588	0.128066	0.653321
CG15270	0	0	0	0.011152	0.0138231	0.0281199	0.00482176	0.00131245	0
stc	0.298843	0.417747	0.466308	0.715266	0.588326	0.644219	0.602013	0.391829	0.583836
CR43853	0	0	0	0	0	0	0	0	0
ZnT35C	0	0	0.00414458	0.00735	0.0205922	0.712399	1.77981	2.00309	1.8414
dao	0.119176	0.238557	0.248477	0.253847	0.232229	0.19267	0.128732	0.0730291	0.043846
Pol32	0.363448	0.21998	0.101782	0.107604	0.0744157	0.185631	0.135153	0.101986	0.181216
l(2)35Cc	0.23815	0.605046	0.605433	0.626003	0.50901	0.422308	0.400742	0.203996	0.295863
yuri	0.0174993	0.0085457	0.060478	0.112689	0.244003	0.143726	0.0512128	0.0227981	0.0568902
Cul3	0.620754	0.880381	1.10691	1.12189	1.24455	1.18345	0.923749	0.546612	0.519785
UK114	0.11326	0.081947	0.47657	0.0968252	0.265245	0.336571	0.633697	1.29338	2.92154
CG15262	0.0378565	0.00409239	0	0	0	0	0	0	0
esg	0.00487417	0.00903388	0.0216417	0.0228509	0.0189301	0.00994244	0.00533436	0.00741369	0
wor	0	0	0	0	0	0	0	0	0
lace	0.291917	0.410052	0.292404	0.24198	0.341521	0.405878	0.368167	0.29482	0.304976
CG18480	0	0	0	0	0	0	0	0.003593	0.0143731
CG4587	0	0	0.00306675	0.033591	0.0238789	0.00810207	0	0	0
CycE	0.559205	0.485003	1.48245	0.122875	0.0569277	0.0277938	0.123298	0.427763	0.291186
CR44974	0.0747634	0.0864837	0.148043	0.0130399	0.0144963	0.00567172	0.00731381	0.0216431	0.0264232
ND-B17	3.88496	3.23402	3.77769	3.23646	2.12796	2.10163	1.81651	1.98545	2.18589
Mtr4	0.379182	0.563438	0.515278	0.399796	0.255941	0.513559	0.478298	0.550728	0.519033
Gli	0.0652805	0.0895682	0.0534747	0.0531066	0.038656	0.0260119	0.0328674	0.0110039	0.00497737
CG3793	0.355632	0.46472	0.543448	0.644401	0.694763	0.845404	0.736659	0.622846	0.324543
wek	0.104309	0.184136	0.190846	0.107322	0.0776302	0.0739852	0.0986136	0.0904116	0.0773135
Ku80	0.208128	0.205061	0.267688	0.258222	0.276057	0.348972	0.0712506	0.0680012	0.0433839
Tep1	0	0	0	0	0	0	0	0	0
CR44868	0	0	0	0	0	0.010128	0	0	0
beat-Ic	0	0	0	0	0	0.0245323	0.0898458	0.0752806	0.036177
CG42817	0.0244179	0.0165204	0.1174	0.0620902	0.181632	0.0225995	0	0.00409068	0
PRL-1	0.453012	0.769376	1.16305	0.815633	0.578635	0.429522	0.376197	0.198124	0.216592
EndoGI	0.899067	1.41773	1.42847	1.50387	1.02382	0.909781	0.612781	0.496109	0.437894
twe	0.232627	0.365331	0.307948	0.266658	0.155627	0.122847	0.086968	0.0715403	0.0676693
CG4935	0.229783	0.430373	0.477742	0.549576	0.551091	0.492107	0.234751	0.129275	0.112838
crp	2.26772	2.07984	2.56351	2.77142	2.75184	2.92222	2.21849	2.0994	1.29205
pkaap	0.219235	0.295158	0.351643	0.313235	0.375093	0.3147	0.199586	0.146989	0.0744503
CG17329	0.0192987	0.00152379	0.0240575	0	0	0	0	0	0
CG13258	0	0	0	0	0	0.00810207	0	0	0.001676
CR44899	0	0	0	0	0	0	0	0.00360713	0
Cyp303a1	0	0.00723342	0	0	0	0.00611281	0	0	0.00183109
heix	0.178284	0.349831	0.267265	0.145557	0.18659	0.122707	0.211072	0.116739	0.0872541
CG17328	0.196041	0.141802	0.173992	0.16441	0.184772	0.132939	0.12226	0.093034	0.0730211
GMF	0.304468	0.625419	0.402406	0.21364	0.140729	0.113401	0.178236	0.126365	0.219932
c(2)M	0.187568	0.187277	0.220097	0.785287	0.878767	0.399832	0.208351	0.181601	0.0799796
CG5861	0.719556	1.01775	1.34897	1.20899	1.08953	1.03958	0.967468	0.768943	1.07011
Syx5	0.32854	0.481922	0.431334	0.351691	0.366246	0.42298	0.33259	0.2996	0.314085
cni	0.613292	0.689464	0.878053	0.729215	0.67325	0.884589	0.910474	0.802063	0.89236
fzy	2.22958	1.38345	0.47957	0.308408	0.303134	0.374138	0.342749	0.351806	0.38632
cact	1.11539	1.10971	0.903924	0.871039	1.14649	1.03801	0.910416	1.01944	0.737261
CG4278	0.671036	0.471733	0.49279	0.582767	0.415239	0.518169	0.412196	0.460973	0.619009
mRpL4	0.910359	1.14003	1.01736	1.13301	1.26143	1.40388	0.989798	1.043	1.45467
CG4440	0	0.00153749	0	0.00718948	0.00678243	0	0	0	0
CG31817	0.070608	0.0588504	0.0128483	0.0273197	0.04833	0.0463852	0.00629	0.0264694	0
CG42266	0	0	0	0	0.00797763	0	0	0	0
CG44405	0	0	0	0	0.00718576	0	0	0.007467	0
CG42231	0.338361	0.259175	0.116138	0.0364272	0.103733	0.0957241	0.0235475	0.0151419	0.027316
chif	0.617585	0.986225	1.07497	1.17569	1.06486	0.867683	0.500589	0.316036	0.253984
CG4455	0.136114	0.1429	0.0921315	0.142729	0.130435	0.167667	0.135289	0.253231	0.236792
CaBP1	1.70223	2.15231	0.895496	0.826137	0.860367	1.29115	0.775375	0.643092	0.736646
jhamt	0	0	0	0	0	0	0	0.0118761	0.000875046
CG5888	0.0192297	0.00276636	0	0	0	0.00283586	0.00490112	0.0285923	0
Idgf1	0.00439527	0.00352441	0	0	0	0	0.0261927	0.00137691	0
Idgf2	0	0.00152379	0	0.0270801	0	0.00601722	0.215766	0.405104	0.332203
Idgf3	0.0164053	0.00735408	0.00633663	0.0432045	0.0216826	0.0125543	0.0944752	0.0998607	0.0456264
dac	0	0	0	0	0	0.00810207	0	0	0
CR44994	0.0098096	0.00292156	0	0.0165186	0.00252078	0.0131983	0.0151646	0.00950951	0.00392838
Tpr2	1.5197	1.55675	1.14255	0.979285	1.10429	1.81016	1.61732	1.61754	1.44499
CG5953	0.0943513	0.162942	0.272393	0.527696	0.636922	0.572213	0.650773	0.5432	0.290106
CR45354	0	0	0	0	0.00717307	0	0.00686295	0.00343509	0
CR45355	0	0	0	0	0.00714375	0.0206996	0.0011324	0.00422645	0.000923066
CG31816	0.00487417	0	0	0	0	0.0219489	0.00874195	0	0
CG42389	0.131917	0.263347	0.300931	0.832473	0.853451	1.12219	1.18054	1.09673	0.736622
CG5968	0	0	0	0.011845	0.0129587	0.0246157	0.0042537	0.00422645	0
CG31815	0	0	0.00836593	0.0108902	0.0664882	0.00988819	0.0184675	0.0107951	0.000856938
CG4631	0	0	0.0110367	0.0179277	0.0204284	0	0.014364	0.00654024	0
her	0.236129	0.324575	0.268748	0.339225	0.318886	0.293128	0.186043	0.175732	0.237328
squ	0.280882	0.399271	0.334198	0.571745	0.565414	0.658826	0.513804	0.388184	0.684347
grp	1.25728	1.28679	1.25832	1.40896	1.60939	1.62835	1.55007	1.84888	2.17375
CG31807	0.0406159	0.0924672	0.0870615	0.128144	0.105074	0.0951162	0.0524662	0.0272418	0.0341256
CG33552	0.0240097	0.0153842	0	0.0020185	0.0101285	0.00646459	0.0078167	0.0138048	0.0124348
CR44975	0	0.00152602	0	0.0020185	0	0.00890047	0.020811	0.0245661	0.0207851
CR43669	0.0433396	0.147025	0.119207	0.115034	0.156562	0.0458524	0.0279433	0.0671849	0.00828142
CR43670	0.153024	0.155621	0.102773	0.230064	0.265678	0.25231	0.157557	0.0689469	0.0239369
CG31808	0.0356289	0.0170017	0.0642852	0.141324	0.828403	0.513564	0.150066	0.0882863	0.0365206
Cyt-c-d	0.0496868	0.0185403	0.0104967	0.0518916	0.0456746	0.0600757	0.0219594	0.00852208	0.00175538
Cyt-c-p	5.72341	6.05459	7.80451	6.64572	8.35076	10.3894	8.35345	9.0771	11.8307
VhaSFD	0.531142	0.431767	0.428486	0.445119	0.571646	0.706623	0.476587	0.528839	0.785689
CR43671	0.151861	0.175103	0.126192	0.180515	0.0960564	0.0490162	0.0342555	0.0409107	0.00213713
CG31812	0.238889	0.146062	0.148934	0.190285	0.247076	0.121326	0.0949709	0.0638067	0.0517734
CG17996	0.82052	0.682674	0.581913	0.833512	0.692016	0.751958	0.508446	0.393219	0.45503
Prosbeta4	6.11316	5.73463	5.52045	4.57349	3.61191	3.48365	3.17485	3.90739	5.46407
CG17904	0.778032	0.590824	0.382586	0.427408	0.524303	0.392542	0.408722	0.384455	0.731554
glu	1.55552	2.39427	1.95344	1.51785	1.38456	0.995424	0.954818	1.12228	0.378383
ChLD3	0.0149035	0	0	0	0.00705876	0	0	0	0.000875046
LSm7	3.08863	2.9908	2.84452	2.15013	2.05841	2.03217	1.83142	2.04554	2.12147
BuGZ	0.711478	0.869672	1.24684	1.04932	1.0952	0.944114	0.706873	0.621551	0.603471
yellow-b	0.00419379	0.0137705	0	0	0	0	0	0	0
Mhc	0.045654	0	0	0.00669503	0.0263548	0.0500509	0.0024952	0.00862945	0.000923066
Cyt-b5-r	0	0	0.00365242	0	0	0	0.00866335	0.0278829	0.00466898
CG17928	0.0242943	0	0	0	0.122964	0.238405	0.0865323	0.0286937	0.0174394
Ugt36Ba	0.00509068	0	0	0	0.0261232	0.0442342	0	0.00781986	0.00882019
Ugt36Bb	0.0131014	0	0	0	0.0041754	0	0	0	0
Ugt36Bc	0	0	0	0	0	0	0.00230982	0	0
mdy	0.146559	0.266823	0.144327	0.278034	0.213946	0.412103	0.279021	0.270896	0.147291
Cse1	0.395626	0.477082	0.269367	0.267534	0.303458	0.246209	0.300538	0.326367	0.578596
AspRS-m	0.389448	0.716668	0.824129	0.340449	0.431681	0.505454	0.376241	0.273502	0.216799
CG13282	0	0	0	0	0	0	0	0	0
CG31810	0	0.0104068	0	0.0307345	0.0159143	0.0157074	0.0222451	0.0170252	0.0073685
CG31809	0.0316471	0.0204475	0.0288165	0.0280791	0.113646	0.0671271	0.0178694	0.0595481	0.0253374
CG6012	0.00394219	0	0	0	0	0	0	0	0
CR31781	0	0	0	0	0.0141175	0	0	0	0
CG6115	2.26981	1.73871	1.66208	2.03217	1.91261	1.52813	1.37738	1.04467	1.42279
tweek	0.0669083	0.113897	0.123436	0.102639	0.120453	0.037945	0.0556796	0.0330482	0.0720375
CR44392	0.0132713	0.0279471	0.00924117	0.0173997	0.012168	0	0.00115624	0.00127423	0.00894297
CG42556	0	0.00893566	0	0.0348259	0	0.0186975	0	0	0.00365435
CG12288	1.25071	0.984577	1.09729	1.09059	0.969006	0.871779	0.669977	0.725988	1.04063
ApepP	0.845508	0.802008	0.463155	0.547437	0.590832	0.695542	0.505662	0.551659	0.510823
beat-IIIc	0.00432697	0.0112439	0.0194843	0	0	0	0	0.00446483	0
CR44396	0	0	0	0	0	0	0	0	0
Lrch	0.228093	0.715235	0.675545	0.478535	0.533647	0.482352	0.420026	0.249313	0.222403
CLIP-190	1.03156	1.27554	1.49583	1.28332	1.41634	1.34359	1.10336	0.740792	0.559262
Rpb11	4.22132	4.46492	5.48166	4.6372	3.3422	2.8723	1.71757	1.57271	1.59491
CG15141	0.37804	0.650194	0.663644	0.562507	0.572913	0.589801	0.473637	0.405072	0.201848
Dif	0	0	0	0	0.0111485	0	0.00726988	0.0301048	0
dl	0.0554527	0.021995	0.189802	0.591697	0.965012	0.755373	0.409258	0.350927	0.3007
CR46204	0.0429216	0.0129539	0	0	0.0107058	0.00973381	0.0422131	0.0406144	0.0110501
CG5050	0.0322406	0.00611031	0	0	0.0041754	0.0165649	0.00242514	0.00426788	0.00532174
CG18563	0.00920115	0.00428276	0	0	0	0	0.00194815	0	0.000923066
BicD	1.55833	2.6262	1.94327	1.34654	1.66071	1.78715	1.78945	1.82982	1.05679
Sgt	3.13875	3.95237	3.88488	3.5917	1.9671	1.96779	1.80076	2.14059	2.66023
Aac11	1.67355	2.35997	2.50198	3.29196	2.98451	1.98322	1.77773	1.7818	0.81277
fws	0.527992	0.199661	0.121884	0.191423	0.225763	0.180385	0.153477	0.154948	0.215415
CG5110	0.75351	0.892207	0.881399	0.473635	0.532946	0.765412	0.491237	0.431736	0.399233
GCS2beta	0.897299	0.890068	0.525013	0.526741	0.438089	0.479005	0.514254	0.568076	0.776134
CG5131	0.292064	0.376182	0.707354	0.58323	0.354347	0.280493	0.167666	0.165422	0.195652
qua	0.403385	0.607223	0.466554	0.716883	0.781094	0.534191	0.344134	0.302784	0.180043
CR45715	0.0140097	0.00592359	0.0102665	0.00833102	0.0157887	0.0875346	0.0693824	0.0749809	0.00619741
CG15142	0.0704356	0.0425355	0.0738734	0.158682	0.143509	0.326499	0.410065	0.497119	0.0513152
mEFTs	1.05866	0.425142	0.296819	0.276262	0.43896	0.393652	0.420456	0.612418	1.55628
Dhc36C	0.0699896	0.0646612	0.0480841	0.040338	0.0740079	0.03867	0.0594562	0.0904044	0.0125295
Oli	0	0	0	0	0	0	0	0.00147209	0
CR45699	0	0	0	0	0	0	0	0	0
CadN	0.0203475	0.0212724	0.0323605	0.00685603	0.0306446	0.0606187	0.0816647	0.0352624	0.0269338
CG5674	0.0626588	0.0990586	0.140745	0.136496	0.129405	0.0461548	0.0406685	0.0449947	0.049367
CG5681	0	0	0	0	0	0	0	0	0
elfless	0.108108	0.00605553	0	0.00857383	0.0259265	0	0.00403209	0.00467499	0
rdo	0.0328106	0.00393494	0.00905109	0.00795798	0	0.00810207	0	0	0
Arr1	0	0	0	0	0	0	0	0	0
CG15153	0	0	0	0	0	0	0	0	0
CG44476	0.0045814	0.0181185	0.0112352	0.0185755	0.00815301	0.0385044	0.0108053	0.0249518	0.019397
CG15152	0	0	0	0	0	0	0	0	0
CG5758	0.0464491	0.0462261	0.0405897	0.0173129	0.040675	0.115356	0.187721	0.0994713	0.0319325
kel	0.199777	0.15727	0.13531	0.154007	0.174441	0.1527	0.127302	0.0545221	0.0784983
Socs36E	0	0.06257	0.086356	0.0488039	0	0.0333787	0.029522	0.0120899	0.0786723
CR44478	0	0	0	0	0	0	0	0	0
CG17681	0	0	0	0	0	0	0	0.00320448	0
CG15155	0	0.00105672	0	0	0	0	0	0	0.0165496
CG5783	0	0.0121161	0.014666	0	0.00610158	0	0	0	0.00408683
CG7200	0.177451	0.255359	0.385945	0.320492	0.216018	0.164292	0.0891777	0.135581	0.222689
Ptp36E	0	0	0	0	0	0	0	0	0
CR44489	0	0	0	0	0	0	0	0	0
Fas3	0.00451665	0.0423	0.08459	0.0576778	0.0842166	0.0819888	0.0234702	0.0273763	0.0266904
RpS26	51.9377	39.3558	35.9178	35.7113	37.9796	49.9365	68.06	72.0031	67.5562
ncm	0.839574	1.69598	1.7115	1.55384	1.27651	0.996293	1.0224	1.01746	0.759823
bsf	0.498404	0.63424	0.664874	0.724863	0.878696	0.574552	0.719997	0.759477	0.722968
Ntf-2r	0.151189	0.14378	0.200062	0.256219	0.218533	0.059139	0.03496	0.0298324	0.00687446
let-7-C	0.00509068	0	0	0	0	0.00283586	0	0	0
CG10283	0.0164053	0.0275605	0	0.00685603	0.0146785	0.0108236	0.0301504	0.035197	0.0297902
kon	0	0	0	0	0	0	0	0	0
CG10178	0	0	0	0	0	0	0	0	0
Pde11	0.0282805	0.0134334	0.0709423	0.386631	0.36872	0.336213	0.480965	0.219708	0.246767
CG15160	0.258144	0.471362	0.39815	0.402493	0.385156	0.347224	0.249776	0.19864	0.135498
amos	0	0	0	0	0	0	0	0	0
CG10413	0.0884323	0.168221	0.101707	0.124599	0.157392	0.0941322	0.0609176	0.0530472	0.0746504
CG31789	0.0625451	0.0110898	0.00474117	0.0213801	0.00501868	0.00882289	0	0	0
CG10333	0.653316	1.20889	1.74992	1.68104	1.20461	0.922857	0.709153	0.62794	0.453767
Atac2	0.158012	0.203161	0.152263	0.253659	0.242066	0.375902	0.149207	0.119382	0.0959826
MESR3	0.0252693	0.00262636	0.00474117	0.020963	0.0596461	0.0438659	0.0391284	0.0506356	0.0121942
Cyp310a1	0	0	0	0	0	0	0.00533436	0.00422998	0
CR42490	0.02093	0.00153749	0.0068652	0	0.00435823	0	0	0	0
CG43338	0.014305	0	0	0	0	0	0	0	0
Mst36Fb	0	0.0269594	0	0.0242433	0.00820959	0.0143627	0	0	0
Mst36Fa	0.0194849	0.0194304	0.0183137	0.0166593	0.0212515	0.00662419	0.00307406	0	0
CG31751	0.117371	0.200398	0.337764	0.576725	0.659318	0.367529	0.173622	0.106782	0.165429
tos	0.120841	0.181361	0.151747	0.0661983	0.0880892	0.10892	0.154648	0.249149	0.271928
msl-1	0.206492	0.301336	0.437628	0.365862	0.401321	0.28866	0.194092	0.257376	0.331027
CG10336	0.65107	1.5675	2.08115	0.700617	0.440877	0.380956	0.89617	1.02155	0.491129
CG10383	0.0629835	0.110261	0.0972794	0.217666	0.229365	0.0891857	0.112083	0.05796	0.0389344
CG10338	0.0490005	0.133295	0.0736968	0.0533964	0.112933	0.0983099	0.0701289	0.124315	0.0629213
CG10341	0.377757	0.272213	0.22079	0.213851	0.298872	0.454403	0.535352	0.548132	0.601516
CG10376	0.281825	0.313358	0.145249	0.141088	0.116044	0.0670243	0.078599	0.0756983	0.120981
CG10343	0.90165	0.551794	0.400664	0.333866	0.292214	0.456669	0.409289	0.399748	1.13168
Jwa	0.874806	1.06195	0.599818	0.604902	0.77549	0.414302	0.382569	0.420281	1.0193
Faf2	0.917609	1.6634	1.81151	1.86709	1.64248	1.22292	0.942862	0.803851	0.679591
Grip71	0.238464	0.352899	0.369772	0.32816	0.273037	0.356897	0.326914	0.310915	0.360719
Irk3	0.0136143	0	0	0	0	0	0	0	0
CG10348	0	0	0	0	0	0	0	0	0
CG17323	0.0867022	0.00681997	0	0.0326082	0.0787578	0.036097	0.0110652	0	0
CG17322	0.00413737	0.00264433	0.00529918	0.00619134	0.0139565	0.0149034	0.0696932	0.12048	0.0324505
CG17597	0.134039	0.265994	0.362349	0.375805	0.692566	0.553801	0.517491	0.422025	0.417937
ScpX	0.550487	0.804258	1.119	1.06828	0.867881	0.6952	0.602573	0.592643	0.459104
CG10600	0.485008	0.813576	0.608165	0.567265	0.57259	0.687858	0.359205	0.391136	0.203073
CG33120	0	0.00700363	0	0	0	0.0125839	0.0100413	0.0112171	0.00204848
CG17321	0	0.0142495	0.00801894	0.0447741	0.0332903	0.00731769	0.00622043	0.00175563	0
CG10602	1.07596	0.328092	0.174662	0.243161	0.21946	0.25084	0.277967	0.23566	0.673493
mRpL13	1.26132	1.47787	1.36987	1.34049	1.09323	1.02404	1.03218	0.984787	1.95167
ssp3	0.373947	0.669878	0.571566	0.536544	0.510706	0.459711	0.32581	0.262356	0.098912
CG46304	0	0.00204044	0.00313392	0	0.00249601	0	0	0	0
CG10428	0.1894	0.238937	0.263653	0.459806	0.401422	0.220653	0.281989	0.203863	0.237546
Nedd8	4.41336	4.8579	5.07267	4.28555	3.33555	2.60672	1.9836	1.8142	2.48844
CG10621	0.144074	0.00485354	0	0.0128616	0.00733839	0.00661152	0.00584014	0.0242586	0.00990575
CR44741	0.0271142	0.00298023	0	0.00394794	0.0148496	0.00567172	0.00764859	0.0264414	0
CG10623	0.051802	0.0776908	0.0649771	0.0616103	0.0463519	0.0295061	0.0319934	0.0585091	0.0495899
Nak	0.0766412	0.130475	0.139928	0.133229	0.182419	0.210079	0.131571	0.122617	0.186743
Tango6	0.0635401	0.106172	0.0856402	0.114271	0.10751	0.128634	0.115046	0.100153	0.0772525
CG10639	0.182743	0.0911624	0.177904	0.216246	0.348295	0.195272	0.241612	0.230363	0.211495
CG10431	0.0341069	0.02397	0.0462846	0.0457174	0.0296798	0.0117217	0.0154247	0.00977944	0.0165266
Swip-1	0.43845	0.276618	0.347025	0.916497	1.28856	0.617008	0.32483	0.0984227	0.124323
CG15168	0.995467	1.95245	1.53049	1.21898	0.952741	1.27849	0.777156	0.728986	0.939384
CG15170	0	0	0	0	0	0	0	0	0
CG15169	0	0	0	0	0	0	0	0	0
CG10650	0	0.00486306	0	0	0	0.0121025	0	0	0
CG31792	0.0045814	0	0	0	0	0	0	0	0
CG31793	0.0592942	0.0144346	0.040014	0.00567413	0.032571	0.0183045	0.0225595	0.0338461	0.0444954
RpL30	31.0258	20.8152	20.9146	21.3315	23.0702	26.563	27.9173	30.0524	25.7726
CG15172	0.51184	0.164758	0.0167681	0.0343477	0.0112383	0.0248309	0.143999	0.166088	0.0371845
hook	0.394456	0.456512	0.263776	0.247575	0.253012	0.315848	0.179167	0.170997	0.323525
CG31800	0.400498	0.330343	0.183098	0.324638	0.335456	0.390268	0.307549	0.306326	0.253112
mib2	0.134466	0.212711	0.213782	0.200168	0.303001	0.255787	0.261178	0.108849	0.0762931
Catsup	0.652339	0.500526	0.329592	0.470179	0.251196	0.414931	0.217948	0.281292	0.396329
Ttc19	0.292555	0.408265	0.414124	0.322087	0.2634	0.145302	0.162856	0.0763961	0.0262435
Acn	0.910157	1.69071	1.41506	1.17932	0.997052	0.941069	0.886512	0.701573	0.568769
CG10470	1.08326	1.707	1.77042	1.2909	1.08426	1.32918	1.23477	1.46498	1.81097
l(2)37Bb	0.254308	0.294676	0.356061	0.329437	0.222245	0.28504	0.132024	0.112335	0.160717
Rpn3	1.45142	1.39411	0.788564	0.976612	0.831892	0.850751	0.75725	0.836194	1.45381
CG10492	0.0981557	0.16659	0.153577	0.0956432	0.145313	0.100524	0.111635	0.0874293	0.112502
Phlpp	0.0177672	0.00712929	0.0168437	0.0377004	0.0712847	0.0548823	0.00344446	0.0118359	0
CG10495	0.0772819	0.169031	0.178	0.308721	0.268928	0.316898	0.193716	0.0999844	0.221471
CG10702	0.0434759	0.00127948	0.00453508	0	0.170801	0.171689	0.113444	0.107314	0.0764608
CG17343	0.911983	1.34576	1.50227	1.71837	1.46362	0.779906	0.543442	0.389383	0.30977
Lim3	0	0	0	0	0	0.00502893	0.00642224	0.00748523	0.00688921
amd	0.152498	0.0203302	0	0	0	0	0	0.0121334	0
CG10561	0.106411	0.182587	0.140168	0.205666	0.12045	0.0872158	0.16467	0.0884687	0.127512
Ddc	0	0.00320443	0	0	0.00858436	0	0.0141778	0	0.000880449
l(2)37Cc	1.77839	1.32176	1.71312	2.08029	2.11901	2.28078	1.94786	2.33461	2.97964
l(2)37Cb	0.160071	0.29602	0.225575	0.305173	0.316487	0.200874	0.177489	0.135083	0.124021
l(2)37Cd	0.145502	0.28742	0.221752	0.0884776	0.168916	0.235214	0.158612	0.104876	0.0903818
AsnRS	1.06077	1.47457	1.21026	1.26311	1.12445	0.982523	1.2342	1.47004	1.99635
DCTN6-p27	0.860537	1.06518	0.969929	1.16535	1.10545	1.19207	0.673178	0.453813	0.458639
l(2)37Cg	0.760669	0.758797	0.816254	0.904468	0.588039	0.899541	0.633981	0.9202	1.11367
brat	0.846181	1.02163	0.9259	0.96727	0.964486	1.26706	0.826731	0.766212	0.591838
CR44977	0.0135221	0	0.0113821	0	0.0025528	0.0116338	0.00648917	0.00563702	0.0033393
CG17568	0.144328	0.241445	0.192334	0.172906	0.23936	0.169063	0.116138	0.0918906	0.121119
CG42688	0.053183	0	0.00905109	0.0116762	0.0143362	0.00708804	0	0	0
CG46059	0.051826	0.0446201	0.0479274	0.146806	0.115754	0.125492	0.0767966	0.0641159	0.110172
gammaTub37C	0.262001	0.186605	0.245265	0.774024	0.642545	0.422407	0.292394	0.218929	0.33406
pigeon	0.10826	0.316264	0.189776	0.135073	0.184681	0.196769	0.153609	0.115551	0.132768
drl	0.0208763	0.022103	0.015548	0	0.0558847	0.0144622	0	0.00520479	0.0030212
CR44189	0	0	0	0	0.0369432	0.0369345	0.00533768	0	0
CR45700	0	0	0	0.00796107	0	0.0118723	0.0062253	0	0
CR45258	0	0	0	0.00695404	0	0	0	0	0
dnt	0.122198	0.183957	0.116608	0.114827	0.238899	0.221031	0.163227	0.136828	0.0369568
CG13086	0.00394219	0	0	0	0	0.0460396	0.170998	0.236945	0.0155976
CG17349	0	0	0	0	0	0	0.00571968	0	0
CG17350	0	0	0	0	0	0	0	0	0
fon	0	0	0	0	0	0	0	0	0
CG17549	0	0	0	0	0	0	0	0	0
CG17544	0.00563773	0.00606723	0.00313392	0.114425	0.367714	0.297163	0.169712	0.226607	0.0285772
Pax	0.232322	0.190907	0.198251	0.301933	0.328747	0.413155	0.369993	0.247265	0.266354
Lectin-galC1	0	0	0	0	0	0	0	0	0
lectin-37Db	0	0	0	0	0	0	0	0	0
CG16771	0.00439527	0.0283913	0.136173	0.207049	0.0872854	0.0968806	0.116886	0.0668588	0.00731585
CG13085	0.0174004	0	0.0102665	0	0.00276331	0	0.00325693	0	0.00677072
RtcB	1.15392	1.20695	1.00585	0.818696	0.762373	0.851083	0.796173	0.779325	0.946656
Rab9	0.0354201	0.0567018	0.116543	0.0814024	0.222386	0.167665	0.308456	0.349907	0.155593
CG10237	0.0465829	0.0145042	0	0.0130792	0.089467	0.0680663	0.0968709	0.135482	0.622748
RanGAP	2.08274	2.20073	1.71429	1.26266	0.798296	1.13547	1.07145	1.22526	1.14461
Hs2st	0.168682	0.248245	0.293776	0.148912	0.209465	0.272827	0.187619	0.169656	0.252895
Top2	1.19894	3.92316	4.85615	4.63976	1.5599	0.929721	0.950965	1.01485	1.47683
CG10026	0.00413737	0.00518952	0	0.0086245	0	0.0206089	0.00724925	0.0127579	0
tj	0.0492158	0.0626509	0.0977793	0.0272935	0.0496482	0.0458569	0.0409381	0.0274821	0.0361507
CR45722	0	0	0	0	0	0	0	0	0
CR43839	0	0	0	0	0	0	0	0	0
CG10195	0.32478	0.559786	0.72009	0.768548	0.49931	0.391429	0.384902	0.243302	0.224934
CG13084	0	0.00417799	0	0	0	0	0	0	0
CG13083	0	0	0	0	0.0041754	0	0	0	0
CG10194	0.153291	0.304622	0.326136	0.472353	0.429337	0.259583	0.173164	0.269786	0.247778
CG18094	0.0263456	0.0720085	0.0620373	0.15358	0.0602244	0.054142	0.0554518	0.0507352	0.0357716
CG10189	0.164295	0.217871	0.298799	0.359372	0.381093	0.384627	0.362455	0.296865	0.166429
swm	0.615076	1.12857	0.911416	1.16599	1.4384	1.14218	0.82063	0.58687	0.530238
Top3alpha	0.367312	0.482754	0.543484	0.476043	0.489319	0.256672	0.270912	0.277559	0.212144
CG10188	0.0148483	0.0557172	0.108507	0.0562957	0.0662031	0.0876752	0.0540251	0.0352104	0.0271742
Hasp	0.206932	0.0901464	0.0111322	0.0129694	0.0372408	0.0158394	0.0235835	0	0.00829612
CR43363	0	0.00751743	0.0068652	0	0	0	0	0	0
CG10132	0.0278836	0.0102785	0.0346497	0	0	0	0	0	0
CG10166	1.03081	1.1676	1.66689	1.26927	0.813	0.736154	0.601797	0.603071	0.674625
CG10137	0.0662741	0.13457	0.172167	0.206431	0.284552	0.101497	0.0453464	0.0133923	0.00529404
CG10165	0.138199	0.158654	0.150817	0.14918	0.165362	0.143128	0.0883785	0.0848087	0.134159
CG33116	0.331566	0.382593	0.318935	0.305667	0.257874	0.27784	0.141515	0.164078	0.268084
CG13082	0	0	0	0.00462047	0.0173286	0.0184054	0	0	0
ref(2)P	0.449566	0.874445	0.949428	1.20873	1.44376	0.7624	0.572347	0.336736	0.479845
CG10337	0.0521786	0.0145333	0.0427994	0.0168847	0.0284692	0.063491	0.212066	0.20443	0.140066
Tep4	0.0904429	0.0376762	0.0337574	0.0516675	0.172398	0.0371625	0.0673227	0.110348	0.0738155
CG13078	0.00451665	0.0032819	0	0	0	0.00242772	0	0	0
CG13077	0	0	0	0.00231487	0	0	0.0076239	0	0
spi	1.08225	0.952842	0.853039	0.984158	0.938146	0.621496	0.337842	0.267841	0.0922472
msb1l	0.650694	0.665012	0.455881	0.220744	0.227482	0.256227	0.268867	0.248607	0.264351
CG10268	0.432711	0.399464	0.459137	0.475479	0.34713	0.302773	0.351194	0.231735	0.267165
Hakai	0.431904	0.485969	0.566393	0.452917	0.306063	0.399778	0.333521	0.262493	0.367051
PCNA2	0.0349722	0.0181183	0.0508449	0.122605	0.0438225	0.0423714	0.0223018	0.027512	0.00424777
CG10366	0.143778	0.253775	0.235686	0.307051	0.397168	0.358456	0.170582	0.157454	0.12313
Lar	0.335797	0.347267	0.289256	0.30674	0.443454	0.231336	0.202396	0.174625	0.12899
CG10462	0.40462	0.319072	0.323109	0.623636	0.750207	0.692563	0.685998	0.443874	0.18482
Nf-YB	0.208388	0.295099	0.550158	0.62502	0.882362	0.829253	0.401385	0.236919	0.114157
CR44906	0.0670189	0.018107	0	0.0125179	0	0	0.00543381	0.0123703	0.0104285
CG10631	0.0508655	0.0646057	0.185681	0.122221	0.107461	0.0832386	0.104174	0.0873355	0.0825914
CG10628	0.561137	0.397687	0.572413	0.609564	0.492659	0.413502	0.463711	0.397052	0.524254
CG10463	0.298957	0.406086	0.370624	0.573794	0.420195	0.449372	0.390579	0.385915	0.333148
fbp	0.393521	0.0679569	0.0126789	0.18633	0.97826	1.00465	0.696125	0.521798	0.455771
bsh	0	0	0	0	0	0	0	0	0
CdGAPr	0.157091	0.249089	0.16361	0.170691	0.209845	0.116891	0.138182	0.105719	0.0673235
CG10466	0.190061	0.132763	0.143583	0.182289	0.219273	0.158325	0.0677658	0.0746402	0.165721
fs(2)ltoPP43	1.08124	1.23824	0.725751	0.994254	0.937447	0.756232	0.64807	0.592553	0.315687
sick	0.00941765	0.0151504	0	0.0238772	0.0138189	0.0199861	0.00319524	0.0174365	0.0155665
snRNA:U4:38AB	0.00563773	0	0	0	0	0	0	0	0
CR45183	0	0	0	0	0	0	0	0	0
COX4	9.55271	8.58886	9.0117	9.82613	10.9708	10.0754	8.17341	8.64933	12.8176
CG16772	0	0	0	0.0189547	0	0	0	0	0.00209621
Hf	0.00439527	0.00105672	0	0.00795798	0.0107058	0	0	0	0
barr	0.313863	0.566643	0.254717	0.244177	0.283053	0.310743	0.281776	0.147288	0.0900364
lok	1.86078	1.12786	2.02968	2.24201	2.23353	1.87739	2.74116	2.41476	2.77049
vls	1.29946	1.44275	1.33556	1.15997	0.993205	1.34042	1.11605	1.14728	1.22524
bwa	0.100808	0.0863096	0.103052	0.0666972	0.129332	0.112019	0.0732732	0.0715969	0.0182551
CG10730	0	0	0	0	0	0	0.0102735	0	0
pr	0.696748	0.764351	0.595921	0.939118	0.957771	0.80389	0.785353	0.76073	0.944273
neb	0.092654	0.176133	0.174697	0.113664	0.0999071	0.137565	0.20385	0.131213	0.174136
fok	0.219772	0.419085	1.00001	0.778123	1.15873	2.37604	2.37735	2.45773	1.43306
CG10747	0.190058	0.0681953	0.0652882	0.0784912	0.128734	0.0856304	0.0889786	0.0816437	0.057545
CG10721	0.414786	0.297746	0.358379	0.419316	0.397796	0.394857	0.255538	0.366216	0.24919
Taf13	2.02969	1.63878	1.51257	1.4083	1.23661	1.17558	0.749608	0.577899	0.737683
nesd	0.677099	1.10286	1.11052	1.22132	0.892836	0.845191	0.540067	0.595532	0.396557
mRpS18B	0.67405	0.838524	0.883627	0.780126	0.603773	0.561997	0.551933	0.642174	1.08334
Kua	0.00451665	0.00127948	0	0.00669503	0	0	0	0	0
CG13970	0.0817752	0.0289833	0.0318548	0.0388206	0.0184627	0.00601722	0.017356	0.0234704	0.0117769
spir	0.0955716	0.136703	0.0972133	0.381264	0.291058	0.296929	0.215629	0.184793	0.263538
La	2.96731	1.38147	0.8269	0.762572	0.953488	1.40364	1.53328	2.04872	4.12784
RtGEF	0.259994	0.370709	0.348712	0.49414	0.405892	0.454373	0.25981	0.1595	0.108858
CG16798	0	0	0	0	0	0	0	0	0
CG10947	0	0.00393494	0	0	0	0	0	0	0
CG10949	0.167847	0.201318	0.193959	0.262486	0.20759	0.168402	0.081661	0.127699	0.145377
Arpc2	1.64758	1.82749	1.90133	2.29844	2.43099	2.29685	2.06095	1.89235	2.66789
snoRNA:Psi18S-525a	0	0	0	0	0	0.0302897	0.00887677	0.00357379	0
snoRNA:Psi18S-640e	0.018632	0.00312184	0	0	0	0	0.0011324	0.00132367	0
CG15130	0.0534435	0.0117961	0.0124494	0	0	0	0	0	0
CG31688	0.100654	0.0224273	0.066168	0.0174968	0.069529	0.0401069	0.0296003	0.0206029	0.0359873
CG31687	0.0431337	0.0119717	0.0168196	0.0483236	0.0623331	0.0377627	0.0555355	0.0345217	0.0487523
CG18858	0.00419379	0.00406346	0	0	0	0	0	0	0
Cdc23	0.131412	0.347558	0.436513	0.312328	0.361318	0.285025	0.335138	0.250366	0.245852
CG2493	0.304518	0.306319	0.557036	0.731224	0.659339	0.66512	0.587955	0.760785	0.474085
CG34007	0	0	0	0	0	0	0.00307406	0	0.00202348
CG17470	0.0491283	0.0329363	0	0.0073641	0.0106041	0	0.0266833	0.0197849	0.0130356
phr6-4	0.172482	0.0748417	0.129712	0.0747051	0.140607	0.183427	0.142836	0.179912	0.0578975
CG2608	0.198767	0.340886	0.288859	0.280837	0.284985	0.278588	0.15726	0.178211	0.212958
Uhg3	0.407175	0.230691	0.2271	0.309124	0.320899	0.475769	0.614605	0.791739	0.504353
CG18810	0.0234815	0.0139219	0.0150076	0.00711089	0.00318773	0	0.0148745	0.00357379	0.00297114
CG2611	0.476634	0.532523	0.348854	0.302067	0.365502	0.292447	0.303631	0.263031	0.291263
brun	0.0840179	0.159426	0.118185	0.222779	0.1518	0.153093	0.180111	0.120539	0.186545
CG2614	0.304771	0.274837	0.336023	0.252865	0.219622	0.310679	0.257498	0.262445	0.30671
CG31678	0.0549287	0.126956	0.0341613	0.112864	0.0808878	0.0358628	0.0681435	0.0578794	0.0204046
IKKepsilon	0.284873	0.381181	0.471477	0.364042	0.425623	0.391088	0.220466	0.175282	0.161141
Cen	0.294305	0.077167	0.0502482	0.079727	0.149995	0.0962465	0.13552	0.075827	0.276656
CG2617	0.375456	0.606673	0.551421	0.435963	0.617719	0.465254	0.309604	0.292666	0.200958
Hr38	0	0	0	0	0.0224106	0	0	0.00427147	0
CarT	0	0	0.0129934	0	0	0.00330576	0.00115624	0.00849907	0.00102424
TM9SF2	0.730379	1.03144	1.06584	1.13675	0.982883	0.723994	0.494517	0.406185	0.432355
Fs(2)Ket	1.60975	1.44956	0.784376	1.13617	1.18213	1.40078	1.66439	1.46405	1.12913
CG9319	0.465904	0.440549	0.30953	0.362448	0.332896	0.331579	0.23208	0.282765	0.255671
Ns4	0.398852	0.242296	0.190146	0.145579	0.206015	0.16493	0.16999	0.189864	0.127233
CG9323	0.105159	0.29214	0.277869	0.28663	0.194337	0.137091	0.125046	0.0949888	0.111983
dia	0.103318	0.210025	0.188208	0.237934	0.308287	0.247099	0.141171	0.189119	0.34533
cad	0.0303623	0.0344153	0.0140514	0.0601602	0.087673	0.182339	0.140108	0.149488	0.461189
Pomp	5.99754	8.59217	8.74616	6.84984	5.15171	4.95498	3.49563	3.90995	5.84226
vari	0.0693149	0.0760988	0.0103524	0.0561666	0.0301439	0.18753	0.408194	0.330478	0.153709
CR44146	0	0	0	0	0	0	0	0	0
CG9328	0.601472	0.971205	0.874234	0.895451	0.71329	0.869234	0.712762	0.664308	0.529629
CheB38c	0.00730316	0	0.00255523	0.0176217	0.0147212	0.0176486	0.0365015	0.0164922	0.00549291
CG9331	0.230438	0.0570446	0.155235	0.373258	0.821769	0.910361	0.831429	0.676773	0.174415
CG31673	1.03217	0.23684	0.358112	0.423818	0.808942	1.11155	1.22283	1.26396	0.952514
CG31674	0.0234387	0.00649837	0.0310897	0.148152	0.428953	0.238808	0.203628	0.125727	0.0603581
Oseg5	0.18971	0.128662	0.147129	0.233964	0.219843	0.0807072	0.0721161	0.0507329	0.0255979
CG31676	0.0164053	0.0492533	0.0244939	0.0973288	0.0242624	0.078212	0.0316639	0.00168607	0.012183
CG14402	0	0	0	0	0	0	0	0	0
twit	0	0	0	0	0.00350555	0	0	0	0
CG9336	0	0.00675409	0.00578836	0	0.0122032	0	0	0	0
CG9338	0	0	0.012245	0.0116035	0	0	0	0.0107341	0.0100207
CG31675	0	0	0	0	0	0	0	0	0
CG14401	0	0	0	0	0.00610158	0	0	0	0
sky	0.196495	0.225408	0.215938	0.23767	0.610527	0.656124	0.510156	0.330431	0.104924
Mtp	0.213045	0.161053	0.204051	0.194767	0.25362	0.121001	0.156343	0.159981	0.176422
CR33318	0.00730316	0	0	0.0208732	0.00394704	0	0	0.00823528	0
RPA2	4.31629	5.15752	6.30205	5.09239	3.25215	2.71046	2.30306	3.45246	1.5482
CG9272	0.778268	0.81219	0.848394	1.02166	0.847257	0.682717	0.5616	0.435081	0.208524
CR33319	0.0270087	0	0	0	0.00640007	0	0	0	0
CG9270	0	0	0	0	0	0	0	0	0
CR44606	0	0	0	0	0	0	0	0	0
CG42238	0.320672	0.439172	0.357203	0.572446	0.731417	0.436683	0.391383	0.271626	0.042966
Itgbn	0	0.00278318	0	0.0035407	0.00834793	0.0332716	0.0076239	0.0166281	0.000875046
CG9265	0	0	0	0	0	0	0.0575346	0.0920039	0.104644
tadr	0	0	0	0	0	0	0.00628781	0	0
CG33509	0	0	0	0	0	0	0	0	0
ppk13	0	0.00162248	0	0	0	0	0	0	0
CG14397	0.00413737	0	0	0	0	0	0	0	0
l(2)05287	0.370262	0.371446	0.586946	0.46159	0.476401	0.581376	0.677521	0.649292	0.472847
CG34136	0	0.00385193	0	0	0.00252078	0	0	0	0
CR43809	0	0	0	0	0	0	0.00400311	0	0
CG9257	0.165414	0.164184	0.0953092	0.168801	0.246898	0.359522	0.371995	0.4646	0.450273
Nhe2	0.0507947	0.143039	0.229483	0.176089	0.171869	0.171743	0.154734	0.0727134	0.0259505
Dap160	0.180218	0.334542	0.184624	0.184646	0.176717	0.287049	0.182072	0.257217	0.159735
CG9253	0.641431	0.512671	0.269923	0.298956	0.251553	0.70695	0.968787	1.14001	1.0906
del	0.513335	0.496318	0.5301	0.472644	0.506154	0.951524	0.996309	0.779429	0.685041
E2f2	0.36135	0.61708	0.51311	0.417255	0.388445	0.589429	0.507758	0.49623	0.746399
Mpp6	0.228383	0.511032	0.49562	0.510632	0.369316	0.673953	0.682661	0.718327	0.949783
CG9249	0.368122	0.211418	0.269947	0.366188	0.375683	0.335717	0.271594	0.198097	0.229713
CG9248	0.0980079	0.110014	0.0841195	0.0564832	0.0743798	0.094179	0.0583456	0.146242	0.157637
Nbr	0.502218	0.627263	0.400813	0.385068	0.373775	0.569286	0.554545	0.647564	0.663283
CG9246	0.581322	0.668274	0.582844	0.639474	0.405357	0.609279	0.997093	1.09418	1.102
CR44910	0	0.00203174	0	0	0.0139074	0	0	0.00168607	0
Acon	0.310245	0.12708	0.0919789	0.128667	0.129758	0.181862	0.267347	0.283798	0.756403
CG31627	0	0	0	0	0	0	0	0	0
bur	0.804228	1.03114	1.06147	0.729755	1.03099	1.09225	0.773203	0.761867	0.71386
scaRNA:PsiU2-38.40.42	0.0177672	0	0	0.0124912	0.010254	0.00973991	0	0	0
CR44911	0.0208036	0.00154716	0	0.0150799	0.0279811	0.0313496	0.00216627	0.00400515	0.00311844
Mcm10	0.164022	0.378783	0.613782	0.19057	0.264613	0.327983	0.32434	0.350189	0.320343
Ret	0	0.00567218	0	0	0	0	0	0.00171399	0
CG31624	0.0116984	0.00867619	0	0	0.00484238	0	0	0	0
CG31988	0.0320869	0.0057818	0	0	0.00716647	0	0	0.0040359	0
clumsy	0.00945557	0.0012124	0	0	0.00632969	0.0277427	0.0187792	0.0210794	0.000999236
Atg18b	0.0988493	0.172653	0.109639	0.163748	0.139786	0.160112	0.0614879	0.0709038	0.00738364
snRNA:U4:39B	0.0557299	0.0589558	0.0353557	0.00522018	0	0.0116528	0	0	0
CG8679	0.11125	0.246668	0.14377	0.167243	0.148826	0.0154401	0.0953722	0.170319	0.162851
CG8677	1.08219	1.99677	1.04489	0.960965	1.36417	1.20226	0.877447	0.736568	0.451671
CG31626	0.0269974	0	0.0144477	0	0.00514665	0	0.00344446	0.0144079	0.000880449
CR45713	0	0.00421766	0	0	0.00785955	0	0	0	0
Hr39	0.337385	0.565128	0.521543	0.354694	0.311076	0.361726	0.238304	0.199199	0.146101
l(2)k14505	1.26196	0.915649	0.681661	0.810511	0.898809	0.903614	0.66046	0.623647	0.761222
CG8671	0.939843	1.08375	0.676744	0.649437	0.857025	0.717418	0.436115	0.373422	0.355959
Cyp6t2Psi	0	0	0	0	0	0.0168911	0	0.00510523	0
Mondo	0.271761	0.31899	0.22251	0.144029	0.170582	0.257842	0.242492	0.184427	0.179629
Gr39a	0	0	0	0	0	0	0	0	0
crc	0.685058	0.645992	0.703259	0.377778	0.499399	0.498451	0.187971	0.150488	0.26541
Tsp39D	0.517598	1.29479	1.41822	1.50248	1.1916	0.699952	0.363138	0.190914	0.200237
dtr	0.00394219	0	0	0.0032296	0	0.00448183	0.0123152	0.00350008	0
nrv3	0	0	0.00255523	0.132588	0.0553239	0.0250891	0.169035	0.0494856	0.0198666
His-Psi:CR31754	0	0.00421766	0	0	0	0	0	0	0
His1:CG33801	0.14164	0.101989	0.218057	0.0416285	0.0178218	0.0190134	0.00731484	0.016753	0.009767
His2B:CG17949	0.184232	0.108557	0.0516312	0.0247981	0	0	0	0.0018867	0.00339611
His-Psi:CR33805	0.050929	0	0	0	0	0	0	0	0
His1:CG33807	0	0	0	0	0	0	0	0	0
His1:CG33834	0	0.00154716	0	0	0	0	0	0	0
His2B:CG33868	0.319	0.0964502	0.106392	0.0407808	0.0229055	0.0053416	0	0.00360069	0.0165901
His-Psi:CR31614	0.0331616	0.0446149	0.0822216	0.0265608	0.0150206	0	0	0.00171399	0
Lamp1	0.862638	0.696739	0.670739	1.08846	1.00548	1.61369	1.05418	0.965355	1.67876
nompB	0.015227	0.0162803	0.0138942	0	0.00789407	0.0080011	0.0362755	0.052391	0.001676
CG2201	0.0390119	0.0447645	0.0189889	0.0715935	0.269722	0.46035	0.483398	0.428823	0.717872
CR43148	0.116325	0.0410654	0.0408676	0.0294251	0.0333652	0.0285936	0.028808	0.0142834	0.00456765
Df31	33.508	88.2479	85.7788	23.7208	28.1881	38.6128	33.2995	29.6023	26.9998
CR44993	0	0	0	0	0	0	0	0	0
Ac3	0.0192224	0.0599953	0.00365242	0.0388817	0.0355266	0.00600115	0.024565	0.0311058	0.00606321
CR43144	0.367586	0.396524	0.398996	0.566705	0.841749	0.763672	0.234666	0.353345	0.148953
Cul2	0.271515	0.548096	0.568789	0.476881	0.506091	0.615665	0.409249	0.287963	0.254337
CG2225	0.0447076	0.117805	0.0803334	0.232969	0.29158	0.242871	0.205174	0.154878	0.0888675
eEF2	7.97439	8.98816	9.09733	9.15083	8.22166	9.63353	12.0828	14.6145	12.5519
nolo	0.0442071	0.0164733	0	0.0271203	0.040188	0.0182442	0.0189826	0.0159704	0
step	0.196319	0.206569	0.172015	0.361765	0.533351	0.414064	0.32979	0.245143	0.487955
CG1416	3.13739	3.17445	3.21461	2.33178	2.12524	2.72134	2.4532	2.73293	2.66224
CG31612	0.00853264	0.0114951	0.00313392	0.0266045	0.0272269	0.0823943	0.0214555	0.0410865	0.0514451
CG11630	0	0	0	0	0	0	0.00724182	0	0
tsh	0.0829451	0.203455	0.180816	0.288854	0.525029	0.306957	0.273485	0.140759	0.0102918
CR44917	0	0	0	0	0.0025528	0	0	0	0
CR44919	0	0	0	0	0	0	0	0	0
CR44920	0	0	0	0	0	0	0	0	0
CR45334	0	0	0	0	0	0	0	0	0
tio	0.00419379	0.0479479	0.027743	0.0206207	0.0569237	0.0311064	0.00636317	0.02306	0.00102424
CR33987	0.00432697	0.0111747	0.0345845	0.0117246	0.0313041	0.0280493	0.0337673	0.00680138	0
CG31601	0.0045814	0.0116048	0.00382706	0	0	0	0	0	0
CG15219	0	0	0	0	0	0	0	0	0
CG10834	0.014305	0	0.00716995	0	0	0	0	0	0
CG6675	0	0	0.0123131	0	0	0	0	0	0
CG3651	0.823255	0.646658	0.473132	1.0081	0.916049	0.76428	0.810891	0.540187	0.42276
CycK	1.01554	1.57825	1.67321	1.36077	1.1377	1.12571	0.994806	0.880307	0.819048
CR43241	0.599929	0.531701	0.551125	0.328232	0.332853	0.363689	0.212558	0.150552	0.0606995
CG42748	0.63042	0.290142	0.152787	0.271174	0.419803	0.358522	0.371187	0.26202	0.212065
dunk	0	0.00337398	0	0.0294266	0.0206523	0.00260122	0.00528048	0	0
Clamp	0.833916	1.21205	0.83965	0.688006	0.798972	0.708275	0.445644	0.285949	0.141206
CR44809	0.00419379	0.00518952	0	0.0264053	0.0525913	0.0114187	0.0128777	0.0109024	0
CG3635	0	0.00124501	0.0138942	0	0	0.00330576	0	0	0
Ir40a	0	0.00591063	0.00365242	0	0	0.0114002	0.0244204	0.0178247	0.00834684
CR12628	0	0.0044812	0.0305305	0.0347858	0.0114474	0.0291867	0.02795	0.0356335	0.00217225
CR43765	0	0.00434511	0.00772971	0	0.00858436	0.00885584	0.00285984	0.00295585	0.0127855
CG3262	2.48692	2.81457	2.08505	2.12398	2.72129	3.11156	2.16914	2.02733	1.12138
RpL21	40.6719	36.9379	35.8528	36.2853	34.4979	33.0357	41.721	49.0714	60.5833
Tif-IA	0.801976	0.675691	0.258066	0.321084	0.329514	0.468111	0.579867	0.730406	1.30914
CG17018	0.0363721	0.0992274	0.140745	0.111426	0.233849	0.0838257	0.181124	0.188588	0.268227
RpL5	21.12	16.0599	15.7612	14.8764	17.573	16.725	12.4619	16.6724	12.9208
snoRNA:Psi28S-2996	0	0.00872277	0.04986	0	0	0	0	0	0.00308089
CG17490	0.0241006	0	0	0	0	0	0	0	0
CR46268	0.432458	0.412952	0.318818	0.270299	0.502087	0.411558	0.269341	0.253339	0.120894
CG17493	1.16161	1.91863	1.5932	0.6159	0.515348	0.659647	0.480265	0.442496	0.959496
Slmap	0.446885	0.506542	0.253951	0.489482	0.536556	0.594809	0.580768	0.539243	0.56031
CG40006	0.0127327	0.0355104	0.0614652	0.232784	0.224358	0.0724314	0.102345	0.13972	0.10192
CG40439	0.0192676	0.0127671	0.0235961	0.00413308	0.0275377	0.0469921	0.0209461	0.045227	0.00365435
CG17715	0.319346	0.287574	0.347381	0.727712	0.864836	0.64606	0.473368	0.398794	0.228209
lt	0.54305	0.431923	0.311307	0.647359	0.505185	0.476638	0.383914	0.277282	0.168532
cta	0.351957	0.524314	0.414414	0.470603	0.42684	0.384791	0.302015	0.315896	0.288948
Cht10	0.0133064	0	0	0.0128074	0.0185703	0	0.0140933	0.0165126	0.00768415
Spf45	0.624911	0.625847	0.797261	1.11501	0.907659	0.873454	0.687976	0.671929	0.519377
CR43242	0.0778231	0.0331254	0.016744	0.0485379	0.0380458	0.0659496	0.0350734	0.0852061	0.0484846
CG12567	0.500154	0.823472	0.940704	0.652661	0.709973	0.605747	0.292295	0.370402	0.307746
CR44268	0.0404377	0.0347599	0.0392248	0.0829493	0.131086	0.0771236	0.023235	0.0380093	0.0116071
CR46253	0.0645526	0.045112	0.077462	0.114353	0.0975391	0.0577532	0.0889485	0.049784	0.00087493
Gpb5	0.0045814	0.00532456	0.0152982	0.00200944	0.00245303	0.00804177	0.0168687	0.00366916	0
Tim23	2.48553	3.22992	3.10162	2.76761	2.07996	2.07438	1.91479	2.15049	3.47992
CG45781	0.0170999	0.0137123	0.0044274	0.0065558	0.00772635	0.0108544	0.0432217	0.0204531	0.012169
CG40498	0.0479577	0.0883496	0.0982529	0.0664978	0.134551	0.106499	0.0632353	0.123992	0.040681
CR41257	0.0165028	0.0355549	0.0325729	0.102489	0.168236	0.0754812	0.0424653	0.0666334	0.0242865
rl	0.910822	1.02568	1.30155	1.06074	1.72386	1.57682	1.05757	0.773312	0.373691
CR40190	0.0184747	0.0138992	0.0138534	0.021547	0.0162418	0	0.00725319	0	0.00756435
CG40191	0.424362	0.58482	0.760074	0.939765	0.803381	0.670785	0.389429	0.350978	0.46784
Yeti	4.31804	4.3606	4.40138	3.92478	3.84831	5.39299	4.42277	4.1848	3.27041
CR44042	0.0360881	0.0679944	0.0162617	0.0430554	0.0520708	0.0373316	0.00474264	0.00498883	0.0191939
l(2)41Ab	0.0443034	0.0296712	0.0110864	0.0679023	0.0227313	0.0459496	0.0500524	0.0652636	0.0151387
CR44043	0.0441876	0.0295172	0.0927729	0.1093	0.176702	0.186203	0.0953522	0.0610272	0.0338831
Maf1	0.375455	0.463128	0.343347	0.293763	0.456774	0.237206	0.309198	0.281015	0.595248
CG17691	0.79412	0.844543	0.687072	0.866291	0.721322	0.554187	0.487749	0.607751	1.0243
CG41520	0.0367971	0.0141647	0.0520735	0.0871576	0.02644	0.0280686	0.0724749	0.0606274	0.0217204
CG17684	0.0829392	0.0715984	0.084276	0.0365305	0.126617	0.190618	0.249921	0.235693	0.107825
MFS17	0.460126	0.56478	0.606669	0.883867	0.503579	0.374536	0.315666	0.3096	0.591313
CG41378	0.0570585	0.0863958	0.226195	0.197392	0.211935	0.154122	0.0133654	0.0279935	0.12575
Scp1	0.0686714	0.0264904	0.0222504	0.0309418	0.0432966	0.0182967	0.0353941	0.0483916	0.0775311
dpr21	0	0.00152602	0.0162178	0.00498857	0	0	0	0	0
CR41243	0	0	0	0	0	0	0	0.00618588	0
CR41501	0.0154343	0.00318633	0	0	0.00923133	0	0.00724182	0.00163218	0
CR40461	0.0164053	0.010689	0.00491486	0	0	0	0	0	0
RYa	0.015053	0.00431626	0	0	0	0	0	0.00397798	0.00213713
uex	1.62879	2.34827	2.1735	2.09629	2.65568	2.59651	1.83294	1.31524	1.11696
CR45139	0.0352966	0.101551	0.0697588	0.205211	0.225068	0.0560906	0.0352139	0.0471804	0.00529023
Haspin	1.07306	0.730938	0.645236	0.642133	0.73414	0.954188	0.520205	0.54508	0.603701
CG17683	1.13231	1.49151	1.48354	1.423	1.31317	1.1706	1.04146	0.867847	0.777825
RNASEK	6.296	10.0095	8.45077	5.79172	3.54326	3.44715	3.74254	5.07181	7.53746
IntS3	0.461939	0.691713	0.572343	0.615271	0.57987	0.705193	0.482152	0.440988	0.321195
Gprk1	1.87939	2.32033	2.20745	2.27949	2.22115	1.43043	0.952834	1.02251	0.585739
RpL38	42.1144	39.8087	43.8141	41.2531	45.7361	47.2995	48.2529	49.1488	40.6245
Stlk	0.44437	1.0446	1.4699	1.19135	0.686829	0.644726	0.431889	0.401097	0.708688
p120ctn	1.87077	3.28234	2.14611	0.973415	1.25337	1.42919	1.05908	1.1206	0.761198
CG17486	1.23758	1.44171	1.09467	1.01141	1.2807	1.20986	0.794988	0.632548	0.407572
CR45923	0	0.00295052	0	0	0.0142503	0.00552978	0	0.0041143	0.0219163
CG17883	0.678885	1.64085	1.8112	0.908971	0.958613	0.866296	0.655587	0.579413	0.39679
Nipped-B	4.07334	5.05842	5.06504	5.20273	6.06581	5.68398	3.96943	2.93902	1.77112
CR45471	0.00509068	0.0221625	0.0293407	0.0192813	0	0	0	0	0
CR41440	0.0098096	0	0.0265556	0.0152286	0.0134182	0.0330542	0	0	0
conu	0.542702	0.709958	0.731977	0.524618	0.378456	0.415946	0.27888	0.229452	0.259543
CR43281	0.0250537	0.0309189	0.0163302	0.00673962	0.042083	0.0363769	0.0146001	0.0111472	0.00175549
CR46064	0.0641385	0.0260337	0.0297368	0.051817	0.0684356	0.041516	0.0442833	0.0733527	0.127335
CG12547	0.339102	0.492508	0.597718	0.785416	0.476566	0.548507	0.250126	0.330262	0.294521
CG17528	0.511121	0.75403	0.642549	0.564442	0.705353	0.63198	0.433385	0.395609	0.359224
CG14464	2.3515	3.09699	3.30283	3.309	3.31001	3.15226	2.14416	2.11094	1.56949
CG44102	0.0149035	0.010188	0.0290629	0	0.00893616	0.0948318	0.138632	0.0995115	0.0357945
Ir41a	0.0155196	0.0129132	0.00772971	0	0	0	0.0343336	0.00283231	0
CR44105	0.00590014	0.00525017	0	0	0	0	0.00657576	0.00151757	0
TpnC41C	0.0771769	0.0242305	0.00929682	0.00590159	0.0132445	0	0.0124162	0.0249323	0.0167902
CG3107	0.399055	0.314798	0.218522	0.216102	0.244992	0.329301	0.282053	0.406242	0.295579
gus	1.46143	2.49768	1.69871	1.61703	2.17471	1.88973	1.41446	1.10534	1.6981
CR43256	0.028905	0.0284169	0.0344388	0.032853	0.0641289	0.184853	0.103739	0.0966636	0.0265943
Atf6	0.651472	1.1137	0.895456	1.05144	1.11352	0.785403	0.706114	0.427813	0.371122
Nipped-A	0.677591	0.957282	1.00222	1.40454	1.59244	1.08327	1.15747	0.966703	0.634068
d4	1.43829	1.14192	0.950381	1.09345	1.51995	1.77503	1.28188	1.25741	0.775389
sxc	2.41869	1.75277	0.799808	1.06848	0.980779	0.967421	0.772476	0.926936	0.688153
CG10465	1.24784	1.26712	1.3604	0.939018	0.981739	1.1587	0.952359	0.806377	0.922097
CG10395	1.01047	1.28771	1.35916	1.54834	1.57553	1.70619	1.06278	0.872999	0.594716
CG30441	0.01308	0.00910942	0.00535971	0.0417398	0.096594	0.189558	0.122506	0.157519	0.0157948
COX4L	0.0208801	0.0188988	0.0136773	0.0515705	0.0260887	0.0271899	0.0270899	0.0478139	0.00533025
CG10417	1.45429	2.20091	1.76627	1.53739	1.29085	1.26038	0.8718	0.664117	0.554475
CR42646	0.00451665	0.0077533	0.0554042	0.0363624	0.0537113	0.0349145	0.0127784	0.0123533	0.000875046
laccase2	0.019365	0.0183202	0.0206982	0.0755453	0.0968765	0.131136	0.0541527	0.0664469	0.0315104
CG30440	0.0138223	0.0273261	0.0259156	0.0658908	0.178243	0.128684	0.0628362	0.0169027	0.0107642
CG30438	0.0477673	0.0396696	0.0271968	0.0376366	0.0268629	0.032034	0.0337117	0.00983118	0.0196515
TpnC4	0.00413737	0.0085635	0.00716995	0.0065558	0.00814874	0.022373	0.00980163	0.011833	0
Fis1	5.83784	4.86021	3.97321	3.5627	3.28521	2.7956	1.92259	1.59652	1.78106
CG17508	0.64435	0.977715	0.957635	1.26098	1.28547	1.68859	1.41433	0.8192	0.871605
CG11665	0.352198	0.397589	0.289734	0.445821	0.619163	0.743343	0.483744	0.356568	0.380849
CG1344	0.681418	0.536321	0.476654	0.4444	0.565591	0.657391	0.50252	0.467654	0.39007
Not3	1.05807	1.11331	1.08062	1.28117	1.14827	1.18462	0.767275	0.627301	0.575884
CR45472	0.0467642	0.0430985	0.047545	0.0979834	0.0843756	0.0427728	0.0197508	0.0324322	0
CG8245	0.00948594	0.0230232	0.0298562	0	0.0397984	0.0415576	0.0136762	0.00446483	0.00153362
kune	0.410237	0.637504	0.46153	0.763302	0.599505	0.468309	0.45525	0.369913	0.388054
scaf	0.0106137	0.0211431	0.00911106	0.011833	0.00718576	0.0317803	0.0173715	0.0256631	0
CG17337	2.55642	1.91497	1.16683	1.5131	1.65166	2.08849	2.07726	2.53255	1.84532
vlc	0.505296	0.902258	1.00192	0.598653	0.744818	1.39057	0.997464	0.988004	0.765866
ap	0.0678266	0.00651419	0	0	0	0.00260122	0.0163997	0	0.00452683
l(2)09851	1.14851	0.810103	0.797079	0.664307	0.351077	0.788786	0.887758	1.31434	1.84178
CG34200	2.74814	1.59106	1.38324	1.12952	1.56838	1.15748	1.35954	1.3896	1.8032
CG7791	0.462354	0.510373	0.348663	0.623037	0.379204	0.375226	0.276781	0.18863	0.217221
Gp210	0.467947	0.633927	0.50013	0.484906	0.539122	0.667879	0.798222	0.709264	0.389498
ZnT41F	0.0761307	0.0722805	0.0539945	0.0996015	0.13536	0.150351	0.0482986	0.0691308	0.0192462
CR44125	0	0	0.00801894	0	0	0	0	0	0
CG43366	0	0	0	0	0	0	0	0	0
[truncated: 10,732 more rows]

## Sheet: germarium_soma
	TF/CC	aEC	cEC	pEC	FSC/pre-FC	pre-stalk	stalk	polar
l(2)gl	1.10861	0.806688	0.807454	0.385162	0.34189	0.404516	0.467113	0.714197
CR43609	0	0.0398858	0	0	0	0	0	0
Cda5	0	0	0	0.00876062	0	0.00787213	0	0
CR46254	0	0	0	0	0	0	0	0
dbr	0.327288	0.341072	0.503834	0.166006	0.206533	0.284382	0.21065	0.216385
CR44987	0	0.0112391	0	0	0.00313122	0.025388	0	0.0270562
galectin	2.69835	1.40207	1.77253	0.798641	0.976976	0.870574	1.48115	0.717724
CG11374	0	0	0	0	0.00775807	0	0	0.0106086
net	0	0	0	0	0	0.0598867	0.493768	0
Zir	0.202054	0.207716	0.145261	0.148672	0.162512	0.346294	0.292961	0.200273
CG11377	0.0899928	0.273253	0.194247	0.161629	0.268804	0.18804	0.0227171	0.240512
Nhe1	0.28055	0.123531	0.0988619	0.0539263	0.0524063	0.0908349	0.0152834	0.0581007
Sam-S	2.61492	4.42997	2.59613	5.28797	2.94568	2.46975	2.59075	2.06373
ND-15	2.202	3.66486	4.80994	3.49761	3.24119	2.70724	2.82686	2.84181
CG13694	0	0	0	0	0	0	0	0
CG4822	0	0.0261914	0.110587	0.00472117	0.0362719	0.0103013	0.0297166	0.00894973
CG3164	0.561572	0.674079	0.964461	0.278512	0.203358	0.270602	0.585091	0.56095
CR44969	0	0.00592002	0	0	0	0	0	0.00339335
Gs1	0	0.120184	0.0285985	0	0.00544462	0.0246691	0.0412519	0.015632
CR44186	0	0	0	0	0	0	0	0
CG31974	0	0	0.0298126	0.0333527	0.00691847	0	0.0349285	0
CG11454	0.47744	0.355656	0.301465	0.328656	0.310595	0.357398	0.316248	0.266179
CG42399	0	0.00685127	0.0204485	0.0150814	0.0219373	0	0	0.0275618
CG3709	0	0.0327188	0.0625328	0.0659966	0.0368013	0.0244829	0.0423006	0.0385363
CG3436	0.684157	0.771153	0.544226	0.792472	0.6491	0.433211	0.509196	0.425317
CG33635	0.822354	0.357599	0.430873	0.180558	0.295915	0.218885	0.346278	0.327909
spen	7.39661	5.91816	5.8272	4.01532	3.33316	4.59945	6.91255	5.72051
mRpL10	0.303866	0.447844	0.394843	0.558959	0.559891	0.223066	0.271117	0.272566
CG11617	0	0.0070918	0.0098056	0.00521234	0	0	0	0.00468066
Tbc1d15-17	0.730474	0.322758	0.431594	0.198954	0.212028	0.234452	0.271131	0.216396
kis	2.32427	2.37333	1.95415	2.04296	1.8811	2.01306	1.83773	2.53272
CR44222	0	0	0	0	0	0	0	0
CR44221	0	0	0	0	0	0	0	0.00827443
CR44218	0	0.0180842	0.0036798	0	0.00634087	0.0117844	0	0
Rpp30	0.248114	0.173678	0.271159	0.199361	0.274191	0.165363	0.186908	0.260549
CG3645	0.42752	0.185475	0.0959799	0.0843008	0.133565	0.12905	0.110744	0.0976973
CG17075	0	0.0522885	0.0212474	0.00707224	0.00310531	0	0.0392197	0.0161718
CG3345	0	0	0	0	0	0	0	0
mbm	0.408226	0.422851	0.153568	0.686844	0.465184	0.197725	0.449911	0.356816
CG11555	0.12054	0.7923	0.33858	0.874881	0.713151	0.454033	0.468694	0.548977
CG17078	0.190557	0.287075	0.215925	0.173027	0.23974	0.189998	0.0829403	0.226237
smo	0	0.161698	0.122061	0.106725	0.0965394	0.109899	0.0625873	0.0945633
CG11601	0.234113	0.170311	0.237026	0.147317	0.181729	0.214705	0.175807	0.272192
CG3625	1.80282	0.291344	0.322912	0.119073	0.320589	0.311717	0.204236	0.326342
CR46262	0	0	0.0084896	0	0	0	0	0
CR46263	0.0867002	0	0	0	0	0.0122186	0	0
Amnionless	0.487943	0	0	0	0	0	0	0
CG11562	0.561207	0.751351	0.732181	0.767562	0.983986	0.612115	0.462844	0.604596
U2af38	1.10907	0.506815	0.484349	0.586052	0.75736	0.369487	0.400322	0.410893
Hop	0.303708	0.787519	0.643329	1.03336	0.957422	0.830798	0.782166	0.609474
Pi3K21B	1.51512	0.495794	0.576411	0.356307	0.337595	0.516993	0.642714	0.340989
Plc21C	1.4743	0.14034	0.0910773	0.0818937	0.127698	0.0945869	0.152794	0.116412
CG31921	0	0	0	0	0.00473438	0	0	0.0030354
Ent1	0.390566	0.405904	0.547213	0.19602	0.150707	0.176909	0.287795	0.235276
CR45367	0	0	0	0	0	0	0	0
CR45366	0	0.00663538	0	0	0.00130313	0	0	0
CG4213	0	0.172581	0.00334476	0.00951929	0	0	0	0
RpI135	0.173649	0.123243	0.0690562	0.285788	0.228831	0.0850944	0.0916505	0.0855055
AP-2alpha	0.314671	0.4968	0.33293	0.439749	0.395808	0.583058	0.43728	0.435151
ebi	0	0.132372	0.151958	0.17182	0.159761	0.11201	0.121193	0.0884285
CG13690	0	0.0842061	0.0769892	0.109909	0.357892	0.0870775	0.0126056	0.102548
RpLP1	32.4265	76.1976	52.666	109.854	104.962	113.324	98.7762	119.111
CG11885	0.410732	0.416171	0.378756	0.508588	0.348222	0.212094	0.320351	0.20981
CG13692	0	0.0589492	0	0.00472117	0	0	0	0.105062
BBS8	0	0	0	0.00721574	0.00365347	0	0	0.00516873
ex	0.626186	0.351425	0.393837	0.410848	0.369143	0.429707	0.250106	0.502474
CR43717	0	0.0060198	0	0	0	0.00262426	0	0.00824963
crq	0.723415	0.426285	0.411711	0.188884	0.233219	0.392785	0.932733	0.350869
shv	0	0.0498021	0.0551347	0.074358	0.0270237	0.152875	0.0584988	0.0943432
CG4133	0	0	0	0	0	0	0	0
CG4297	0	0.0543696	0	0.0225259	0.00899066	0	0.0331837	0.00768602
MED15	0.395655	0.192872	0.233178	0.106571	0.179076	0.224812	0.0896797	0.13304
ush	0	0.0978027	0.39175	0.0856427	0.168685	0.13903	0.0459911	0.0800732
cbt	0.635612	0.312823	0.649095	0.11377	0.330737	0.455698	0.538834	0.366149
CR46258	0	0	0.0192758	0	0.0159464	0	0	0
lwr	1.53417	2.99739	2.66024	3.58367	4.37794	3.30796	2.86578	3.08596
Spp	1.06812	1.19832	0.94539	1.32374	1.44799	1.85979	1.50508	1.71896
Ets21C	0	0.168924	0.0979355	0.0196321	0.0250977	0	0.0290057	0.0253844
nAChRbeta3	0	0.0104722	0.0102643	0.00523333	0.023649	0	0.0408206	0.00713823
rempA	0	0.0409008	0.0103467	0	0	0.00263199	0.014146	0
Tspo	4.54815	2.5668	4.39336	1.36858	1.56289	2.65914	3.14691	1.94145
CG11835	0	0	0	0	0.00847054	0	0.0142887	0
CG2794	0.353829	0.376387	0.179269	0.383178	0.32489	0.272916	0.218597	0.207154
Nle	0.35641	0.395671	0.348526	0.52618	0.448006	0.189332	0.366468	0.262923
Sf3b1	0.314474	0.328116	0.273496	0.206352	0.115186	0.25462	0.181193	0.219117
Ipk2	0.550615	0.599668	0.459668	0.302612	0.399066	0.370112	0.336279	0.430887
cold	0.437012	0.20205	0.170643	0.109457	0.0944474	0.0845318	0.116961	0.6535
Ptth	0	0	0	0	0	0	0	0.0146655
Pph13	0	0	0	0	0	0	0	0.00943799
Gsc	0	0.0220489	0	0	0	0	0	0
CR46148	0	0.0127713	0.00427887	0	0	0	0	0
CG13689	0.286779	0.44812	0.38387	0.234529	0.246676	0.387457	0.296772	0.334528
CR44798	0	0	0	0	0	0	0	0
CG2839	0	0.028152	0.00720765	0	0	0	0	0.00543039
ds	0	0.0472701	0.0134569	0.0290475	0.0115651	0.0124408	0.0290057	0
CR46260	0	0	0	0	0.00356125	0	0	0
Eaat2	0	0	0	0.00576879	0	0	0	0
GABA-B-R3	0	0.0283844	0	0.0104771	0	0	0	0
CG13947	0	0	0	0	0	0	0	0
Pkg21D	0	0	0	0	0	0	0	0
Nnf1b	0	0.11394	0.189189	0.0673088	0.135526	0.0909984	0.0988674	0.141055
Dbp21E2	0.229922	0.137882	0.215421	0.218519	0.220922	0.11941	0.154407	0.175074
Saf6	0.313458	0.850269	0.223051	0.192397	0.0985485	0.0443875	0.0599399	0.0922909
Pex12	0	0.224129	0.115472	0.0611415	0.0820527	0.0549052	0.0384978	0.0635435
PGAP2	0	0.151516	0.142774	0.0716112	0.110993	0.122401	0.0564993	0.125415
Clp	0.303708	0.432221	0.332875	0.262393	0.360883	0.236215	0.17539	0.215875
CG3662	5.38906	3.69098	5.34997	1.54519	1.08235	1.11827	2.83831	1.80679
CG3862	0.0867002	0.22479	0.115075	0.050252	0.116223	0.132833	0.0763834	0.105312
dock	0.326845	0.267592	0.123287	0.116695	0.0902775	0.213007	0.100307	0.0945005
drongo	3.37488	1.46375	2.68107	1.77194	2.28649	1.82565	1.12238	2.52885
CR44060	0	0.0176547	0	0.00533518	0.0100059	0.00784692	0	0.0200132
CG4291	0.287164	0.12356	0.206916	0.165962	0.10822	0.0964753	0.185768	0.0967353
kraken	1.33742	0.667387	0.76028	0.506093	0.548914	0.443834	0.775856	0.577829
CG13949	0	0.0275534	0	0.0289509	0	0.00262426	0	0
CG13950	0	0	0	0	0	0	0	0
aru	0.67821	0.13568	0.0704197	0.145963	0.159216	0.467175	0.887686	0.435168
dbe	0.343301	0.40189	0.301239	0.579039	0.639669	0.31565	0.237717	0.364039
PNUTS	1.63951	1.67799	2.18651	1.04235	0.633087	0.861574	1.5896	1.29983
ninaA	0	0.00771634	0.0109012	0.00698727	0	0	0	0.00877277
CR45348	0	0	0	0	0	0	0	0
Lsp1beta	0	0	0	0	0	0	0	0
IA-2	0	0	0	0	0	0	0	0.00997261
CG4415	0	0	0	0	0	0	0	0
S	0.0771784	0.748961	0.479292	0.285167	0.477848	0.423276	0.340974	0.543867
ast	0.0838504	0.0601567	0.0769989	0.134669	0.10005	0.101074	0.0656614	0.113617
Atg4a	0.36725	0.227298	0.266173	0.233972	0.279105	0.346146	0.445157	0.27544
CG4629	0	0.00436947	0.0192724	0.00862141	0	0.0136132	0	0.122857
mtRNApol	0.529284	0.0942087	0.117093	0.166105	0.0710663	0.108325	0.0230502	0.0995596
Pino	4.535	0.914024	0.922587	0.319362	0.398539	0.683934	0.622443	0.355675
CG4552	0.24053	0.113876	0.0995208	0.0688133	0.0881993	0.071313	0.188799	0.152299
Iris	0	0.0245197	0	0.0298597	0	0	0	0.0187375
CG4577	0	0.0110148	0	0	0	0	0	0
MFS3	0	0	0	0	0	0	0	0
l(2)10685	0	0.16236	0.102999	0.0911287	0.118734	0.0401291	0.0935307	0.0570043
Tfb4	0.06027	0.191581	0.198968	0.146206	0.244134	0.136006	0.0898328	0.165504
Vps29	1.16775	1.22593	0.747145	0.967635	1.03955	1.14658	1.21761	0.712471
capt	1.81472	0.823011	1.1907	0.673828	0.727065	1.07971	0.760759	1.02866
CR43767	0	0	0	0	0	0	0.0135259	0
Tango14	0.521583	0.622152	0.492631	0.511237	0.638028	0.56378	0.527423	0.544572
CG5080	1.00568	1.61536	1.13762	0.122168	0.0521593	0.0178132	1.06133	0.0279756
IntS14	0.0870853	0.201874	0.112048	0.164753	0.192016	0.139897	0.102714	0.161607
CG14341	1.17619	0.412378	0.291377	0.165925	0.256109	0.26224	0.326954	0.19809
Plap	0.563852	0.448718	0.577231	0.48605	0.630439	0.523625	0.360994	0.517088
CG31922	0	0.148048	0.21082	0.0647251	0.144562	0.0974964	0.0757885	0.0818726
Charon	0.28108	0.213045	0.177966	0.213602	0.136887	0.117339	0.184173	0.0957045
CG4887	0.147355	0.260932	0.257078	0.282232	0.196148	0.160455	0.410453	0.259361
CG4896	0.342916	0.339195	0.349567	0.172724	0.210815	0.157243	0.277519	0.241355
CG5126	0.229537	0.322447	0.276102	0.260735	0.328432	0.335417	0.315425	0.270273
Tgt	0.06027	0.418976	0.344484	0.252375	0.201864	0.119304	0.169115	0.192022
CG5001	2.52774	0.0356646	0.0451838	0	0.00186209	0	0	0.0518005
CG5397	0	0.0170682	0	0	0	0.0389558	1.16457	0
CG5561	0	0	0	0	0	0	0	0
NLaz	0.153445	2.11166	0.0908802	0.153286	0.030775	0.0322806	0.0487206	0.129876
CG14346	0	0.0135858	0	0	0.0026587	0	0	0
robo2	3.68428	1.34319	1.99691	0.550006	0.821525	0.746998	1.81607	0.109194
CG33128	0	0	0	0	0	0	0	0
CG18131	0	0	0	0.0101176	0	0	0	0.00322642
CG7420	0.0838504	0.196686	0.223196	0.110304	0.121165	0.102836	0.064262	0.0551771
haf	0	0	0	0	0	0	0	0.0437531
CG10869	0	0	0	0.00424294	0	0	0	0
CG31935	0	0	0.0975153	0.0271144	0.0333973	0.0505433	0.0757724	0.0305337
CG14352	0.243438	0.111781	0.0831463	0.0251632	0.0709201	0.031154	0.0116391	0.0427712
RFeSP	4.88892	6.30414	4.92948	6.37806	4.47059	3.289	4.09478	3.65671
chinmo	0	0.138073	0	0.0180786	0.00982971	0	0.0387151	0.00387208
cpb	0.580211	0.720187	0.586923	0.865067	0.930088	1.03792	0.768019	0.731908
CG17660	0.719899	0.351885	0.435887	0.245818	0.218581	0.348229	0.417034	0.278063
CR44976	0	0.0131069	0	0.0152092	0	0	0.014146	0
mRpL48	0.457363	0.949687	0.745373	1.01732	0.81344	0.434467	0.341797	0.707996
frtz	0.0899928	0.0344349	0.0443207	0.0249897	0.01444	0.0212519	0.0736857	0.0383346
Rim2	0.430949	0.593073	0.587666	0.321883	0.243179	0.22597	0.26086	0.248417
Eno	6.87781	4.38162	3.12918	3.7227	3.43573	3.11568	3.05336	3.73952
Rrp40	0.551822	0.669002	0.430832	0.972495	0.895606	0.386708	0.464054	0.475062
CG31937	0.975746	0.428996	0.651725	0.366757	0.385531	0.482151	0.502537	0.412786
CG17652	0	0.0797053	0.122548	0.125933	0.0842674	0.0692295	0.158128	0.0863898
CG17646	2.24045	0.486729	0.579922	0.225748	0.22443	0.456244	2.05689	0.137562
CG17712	0.667742	0.284848	0.328116	0.156381	0.239929	0.283633	0.291444	0.269704
CG17648	0	0	0	0	0	0	0	0
CG17650	0	0.0143702	0	0	0.00695898	0	0.0151498	0.00509406
CG31663	0.0838504	0.0846409	0.0115362	0.00447205	0	0	0	0.0141322
Wdr62	6.20454	1.68827	1.74376	0.897009	0.532086	0.434656	0.78092	3.81746
Der-1	1.36097	0.683209	0.946098	0.758209	0.785618	1.68825	1.81471	0.700824
CG15356	0	0.113599	0.0693788	0.104726	0.16252	0.124876	0.0961051	0.12371
CG15362	0	0.0828883	0.0331817	0.0558778	0.0388697	0.0465181	0.0984979	0.0786583
CG7289	0.174171	0.133417	0.0890541	0.182667	0.173014	0.145111	0.0994569	0.128614
Got2	1.42172	0.951151	1.16781	0.60691	0.52244	0.782054	0.84372	0.5807
Npc2a	5.0778	2.90252	1.90136	2.09834	0.729191	1.03249	5.29127	2.69348
CR42874	0	0.0185599	0.0283318	0.00472117	0	0.013455	0	0
CG15353	0	0	0	0	0	0	0	0
Nplp4	0	0.00747849	0	0	0	0	0	0.00796566
CG4238	0.250827	0.191288	0.0797174	0.173342	0.175253	0.0858868	0.196423	0.147463
Su(dx)	0.229537	0.15238	0.154374	0.0699553	0.0407731	0.0768178	0.112273	0.0827953
CR45298	0	0	0	0.00578655	0	0	0	0
Kebab	0.0771784	0.149019	0.121257	0.0624274	0.110845	0.0598226	0.11174	0.065787
GlyP	0.988814	0.308881	0.264571	0.351596	0.200965	0.258384	0.211614	0.387613
tho2	0.221299	0.415431	0.409147	0.317325	0.269736	0.204618	0.318444	0.323766
CG11723	0.0771784	0.170011	0.204504	0.0861042	0.148411	0.0745957	0.113469	0.0795125
TBCD	0.220015	0.185673	0.195481	0.160347	0.178064	0.140395	0.263521	0.12045
AIF	0	0.252029	0.169669	0.309942	0.223575	0.122923	0.118513	0.156454
CG15382	0	0.00910521	0.0123683	0.0223804	0.016534	0.0264679	0.022916	0.0175906
aop	3.96219	3.98738	4.76763	3.40636	3.31065	7.99987	11.512	3.83141
CR43751	0	0	0	0	0	0	0	0
CG10874	0.513909	0.181051	0.126197	0.15285	0.12574	0.185444	0.088788	0.0575711
CG34172	0	0	0.0120681	0	0.0143178	0	0	0
CG15385	0	0.0159047	0	0.0166106	0.00440314	0.0086356	0.013528	0.00670208
Uch	1.03527	1.76288	2.01916	1.55669	2.36167	2.27919	2.15033	2.23495
CG34174	0	0.166101	0.243828	0.157582	0.169952	0.123518	0.134667	0.141805
CG10880	0	0.6472	0.504582	0.310267	0.418149	0.44164	0.441463	0.428628
mio	0.153445	0.188688	0.343358	0.146817	0.134298	0.0739718	0.120502	0.116857
papi	2.08816	0.349415	0.640634	0.312509	0.327139	0.241547	0.275804	0.302602
CG15387	0.202054	0.505449	0.389489	0.262991	0.215251	0.315203	0.27756	0.223447
sau	0.881803	0.947662	1.16684	0.610513	0.738573	0.857517	1.22151	1.04174
CR44114	0	0	0.00866499	0	0	0	0.0109821	0
Sec24CD	0.226687	0.206259	0.319133	0.246741	0.306744	0.51682	0.20485	0.33938
CR44115	0	0	0	0	0	0	0	0
CG4267	0.229537	0.0979099	0.0377529	0.00362015	0.014458	0	0	0
CR42859	0.0867002	0	0	0	0	0	0	0
CR43754	0	0	0	0	0	0	0	0.00518206
CG31681	0	0	0	0.00814983	0.00549348	0	0	0
CG9967	0.0838504	0.481092	0.436104	0.37286	0.71428	0.462379	0.497089	0.996168
eys	0	0.0294252	0.0242372	0.00576879	0.00387012	0	0	0.0115402
Rab5	3.14036	3.39663	5.00749	1.71706	1.58013	1.97082	2.25077	1.76525
Axud1	0.402327	0.540757	0.602041	0.314441	0.225563	0.363523	0.359068	0.409502
CG3597	0	0	0.0328969	0.00471271	0	0	0	0
CG3609	1.63602	1.01679	1.34782	0.753828	0.568442	1.02059	0.7857	0.815126
CG15390	0	0.0708115	0.103617	0.0453386	0.0989365	0.034116	0.0827336	0.0277362
CR44982	0	0	0	0	0	0	0	0
Atxn7	0.0899928	0.341642	0.167403	0.157285	0.183913	0.187232	0.120263	0.22521
Eogt	0	0.144339	0.201653	0.0906885	0.169991	0.306865	0.298738	0.244932
PIG-Wa	0	0.0678625	0.0271517	0.0390491	0.0403503	0.0810337	0.0658057	0.0361607
VGlut	0	0	0	0	0	0	0	0
CG9886	0.06027	0.0815448	0.0494974	0.0826673	0.0171737	0.0645256	0.0768605	0.0404421
dpp	2.36212	0	0	0.040536	0	0	0.0244923	0.0163585
Slh	0.400336	0.238994	0.260465	0.179459	0.187165	0.360054	0.258544	0.25868
oaf	0.177078	0.262101	0.280281	0.19949	0.290523	0.4681	0.559195	0.276833
Cyp309a1	0	0	0	0	0.00438853	0	0	0
Cyp309a2	0	0	0	0	0	0	0	0
insv	0	0.125037	0.0608277	0.0189118	0.0374721	0.0744914	0.122241	0.0586461
Elba2	0	0.0438129	0.0516466	0.0189296	0.0119849	0	0	0.0468686
ND-B17.2	2.50753	2.07809	2.15695	2.0747	1.70129	1.72499	1.62626	1.54098
Arpc5	0.916677	2.49573	2.68316	2.54628	3.10481	2.11104	1.76527	2.00274
Drp1	0.54053	0.655452	0.654245	0.467156	0.528212	0.506452	0.507423	0.352691
CG31690	0	0	0	0	0	0	0	0
CG15398	0	0.0102486	0	0	0	0	0	0
CG31689	0.768558	0.145678	0.727391	0.245141	0.298397	0.387922	1.27137	0.184113
Hrs	0.457508	0.150617	0.167428	0.0673072	0.152144	0.148429	0.114938	0.147372
CG9961	0	0.0348859	0	0.0273309	0.0103098	0.0495793	0.013528	0.00776388
Cwc25	0.389898	0.497651	0.239239	0.38	0.393809	0.324745	0.290648	0.348699
Pgk	3.82704	4.24845	3.50414	3.2816	3.48357	2.52654	2.61675	3.14874
Bacc	17.9088	23.5005	18.3369	24.8963	21.8165	19.5464	19.3036	19.4098
CR44772	0	0	0	0	0	0	0	0.00443339
Trn-SR	0.142837	0.0883647	0.0847666	0.0781043	0.0733075	0.142968	0.0440337	0.061212
CG3077	0.0838504	0.0989788	0.142669	0.123528	0.0540978	0.0576328	0.285264	0.108377
aph-1	1.20598	0.623857	0.659391	0.411693	0.509502	0.663805	0.910636	0.492222
Taf10b	1.4665	1.08209	0.778646	1.1206	1.23796	1.02247	0.994651	0.667406
Taf10	1.19278	1.20539	1.4592	1.17946	1.13895	0.984761	1.09058	0.697534
colt	0.993461	0.948202	0.944449	1.14384	1.05548	1.13214	1.74887	0.965785
CG2862	7.77842	5.01702	6.09573	5.66846	5.85006	4.20024	2.65834	3.72389
CG15399	0.173785	0.0070918	0.0432239	0.0348843	0.0418808	0.0103013	0	0
Syt1	0	0	0	0	0	0	0	0.0121016
daw	1.00078	0.0311181	0.0239513	0.00916291	0.0128785	0.0359612	0.659204	0.0215357
G6P	0	0.00965147	0	0	0	0	0	0.00916489
Duox	0.389898	0.0738746	0.0348504	0.00814667	0.0654499	0.0858205	0.0715434	0.0818538
CG3117	0	0	0	0	0	0	0	0
CG3104	0.141784	0.00778496	0	0	0	0.00348638	0	0.00688602
RpS21	13.4601	22.2361	22.7114	32.8212	33.5008	36.47	26.726	41.7552
CG2991	0.346208	0.220353	0.322851	0.067755	0.0634927	0.0675421	0.154291	0.146245
CG31694	0.937039	0.599466	0.446551	0.478756	0.369765	0.575416	0.558246	0.343113
CG8814	0.338107	0.227803	0.302518	0.102569	0.133357	0.12231	0.295187	0.163457
Prx6005	0.290457	1.16127	1.35026	1.30291	1.40392	1.01382	0.926443	0.776596
CG31950	0.306047	0.36628	0.334446	0.632208	0.511142	0.401084	0.371694	0.2826
betaggt-II	0.2931	0.443374	0.394149	0.321215	0.384255	0.383214	0.341259	0.289857
NTPase	0.303936	0.33218	0.44236	0.130761	0.210722	0.248185	0.275687	0.150707
lilli	1.0623	1.23161	1.61849	0.610696	0.52458	0.461049	0.82618	0.813083
Rbp9	0.237295	0.241312	0.0485321	0.00483102	0.012251	0	0	0.0165367
Ts	0	0.429196	0.20456	0.607961	1.12983	0.210374	0.225186	0.391016
Rrp1	0.06027	0.675112	0.593543	0.75197	1.20121	0.648082	0.414033	0.403103
gammaTub23C	0.161029	0.227044	0.19878	0.226346	0.480491	0.336203	0.20558	0.0817844
CG9641	0.317708	0.208215	0.20316	0.0352036	0.100917	0.0847171	0.189078	0.113527
CG3165	0.228869	0.227004	0.200776	0.144713	0.225006	0.130304	0.237656	0.216839
CG9643	0.661908	0.566721	0.418695	0.596437	0.552127	0.404859	0.362333	0.304864
Chd1	0.518564	0.455979	0.344545	0.305417	0.296692	0.382005	0.431803	0.419305
Bem46	0.200079	0.323636	0.281887	0.265067	0.379964	0.455497	0.293585	0.294743
okr	0	0.0880085	0.0883824	0.0960728	0.102742	0.10414	0	0.0682053
CG3558	0.550538	0.215805	0.401341	0.216372	0.170798	0.244259	0.352465	0.218342
CG17265	1.0914	1.73587	2.5198	0.706829	0.603293	0.493336	0.489206	0.530845
CG17224	0.320616	1.45806	2.70866	1.06189	1.69409	1.45605	2.14297	0.807608
CG17264	0.0771784	0.530402	0.646408	0.106791	0.0665507	0.0563802	0.28079	0.157301
alpha4GT1	0.5853	0.328989	0.342008	0.155156	0.307621	0.355384	0.341134	0.209137
CG3542	0.469072	0.669017	0.526346	0.501992	0.671598	0.548796	0.496937	0.498394
Sf3b2	0.475361	1.16786	0.894185	1.07775	1.01703	0.831946	0.829165	0.849986
CG17219	0	0.147541	0.132753	0.237317	0.221072	0.0727598	0.0850387	0.104411
GABPI	0.161029	0.305594	0.518653	0.290752	0.357083	0.32637	0.322111	0.384271
CG17258	0	0.00959133	0.0062277	0.00475379	0.00126913	0	0	0.00695545
SerRS	0.765163	1.32365	0.974284	1.68868	1.58327	0.899669	1.28122	1.19124
CG17260	0.0867002	0.119652	0.0776174	0.0386148	0.052264	0.100065	0.203184	0.125284
cnir	0	0.163797	0.131552	0.028449	0.0472298	0.0326897	0.00816411	0.0527089
CG17221	0.176693	0.221321	0.179937	0.171977	0.164245	0.113488	0.172152	0.0813675
CG17261	0	0.0321401	0	0.0107851	0	0	0	0.0104789
FASN2	0	0	0	0	0	0	0	0
snRNA:LU	0	0.00606808	0	0	0	0	0	0.00964244
snRNA:U5:23D	0	0	0	0	0	0	0	0
FASN1	1.22445	1.20623	0.567642	0.591006	0.439716	0.339888	0.5422	0.730226
toc	0.654013	0.114791	0.166373	0.0527655	0.0644334	0.0556954	0.0122462	1.94359
ND-B14.5B	3.02652	2.85744	2.75945	2.66622	2.35673	1.78661	1.90146	2.00783
Mad	0.671293	0.834014	0.744076	0.411144	0.399227	0.377939	0.64687	0.464719
gkt	0	0.00691601	0.0189196	0.0193076	0.0286622	0.00529924	0.0141796	0.00832892
Hydr2	1.10835	0.220078	0.272556	0.252752	0.21991	0.260941	0.34496	0.492251
CG44002	0.0899928	0.0728558	0.0621631	0.00578655	0.00436849	0.0783382	0.0481235	0.0367571
CR44003	0	0.0354391	0.0187618	0	0.0134082	0	0	0.00339335
CG15404	0	0	0	0	0	0	0	0
CG9664	0	0.0732854	0.122206	0.0157798	0	0	0.00816411	0
CG9663	0	0.0850792	0.0344358	0.0353933	0	0.029146	0.164873	0.0193397
CG3277	0	0.0324197	0	0	0.00463252	0	0	0
Fign	0.0771784	0.098543	0.0679145	0.0326731	0.0512557	0.015705	0.026372	0.0211688
CG8837	0	0	0	0	0	0	0	0
E23	4.79086	1.7603	2.16072	0.779835	0.975572	0.641802	0.0934117	0.56379
CG34394	0.365932	0.161745	0.213938	0.100354	0.0920477	0.11314	0.275641	0.265399
CG15412	0.266824	0.0106128	0	0.00576879	0.0030703	0	0	0
CG9662	0.489218	0.956024	1.12851	0.826155	1.32298	1.08994	0.716342	0.956517
Ptpa	0.88498	0.46919	0.488038	0.34363	0.381846	0.311786	0.484992	0.227417
pgant2	0.615429	0.30967	0.186256	0.0497292	0.221005	0.610067	0.676103	0.728061
CG2772	0	0	0	0	0	0	0	0
Snx1	0.807648	0.482954	0.715551	0.457993	0.479902	0.490768	0.502366	0.243788
CG12795	0.344336	0.460723	0.376376	0.307596	0.179146	0.285179	0.762181	0.283279
Cog3	0.37346	0.140479	0.16622	0.0739957	0.0902315	0.090281	0.123755	0.0917836
Sec5	0.518291	0.230141	0.203356	0.125125	0.119543	0.190895	0.176192	0.0775563
CG3246	0	0	0.00407101	0	0	0	0.0238788	0.00525151
msl-2	0	0.0765865	0.102501	0.0596251	0.0408017	0.0425251	0.00816411	0.0691169
ND-PDSW	4.00002	5.54404	4.9337	4.92929	3.92836	3.26996	3.40877	3.16998
CG3238	0	0.0538789	0.0783714	0.134659	0.0666336	0.0921785	0.0565196	0.0809576
CG31776	0	0.00437675	0.0109012	0	0	0	0	0
pgant4	0	0	0	0	0	0	0	0
Thor	5.05804	6.85122	17.6977	2.38743	0.95656	1.77287	5.17353	1.63137
CG15414	0	0	0	0	0	0	0	0
tim	0.612236	0.427778	0.173188	0.287676	0.045206	0.0685622	0.191511	0.067941
CG31954	0	0	0	0	0	0	0	0
LeuRS	0.284419	0.48402	0.208043	0.359667	0.337482	0.248841	0.297916	0.210159
CG17593	0.287711	0.412812	0.310429	0.457993	0.314987	0.307347	0.470302	0.253278
CG3213	0	0	0	0	0	0	0	0
CG8851	0	0	0	0	0	0	0	0
Sr-CIV	0	0	0.0127467	0	0	0	0.00816411	0.0119462
CG8852	0	0	0	0	0	0	0	0
Spindly	0.0838504	0.181743	0.252351	0.185417	0.212786	0.165046	0.223089	0.113513
sob	0	0	0	0	0	0	0	0
odd	0	0	0.00902832	0	0.00501925	0	0	0
Dot	0.260928	0.0377538	0.0568999	0.0196486	0.0121064	0.033431	0	0.0237983
CG15418	0	0	0.0115063	0	0	0	0	0
for	0.641455	0.894226	2.08321	0.858486	0.509484	0.649857	0.688038	0.369281
CG3513	0	0	0	0	0	0	0	0
CR43364	0	0.00492747	0.00570608	0	0.00733365	0	0.0122462	0.00768749
CG43165	0.06027	0	0.0127024	0.0049636	0.00125417	0	0.0261336	0.0223897
CG16713	0.0870853	0.00911172	0.254716	0.0202296	0.0125781	0	0	0.00854881
IM33	0	0.00423536	0	0	0.00299422	0	0	0
CG3604	0	0	0	0	0	0	0	0
CG31778	0	0.0113719	0.0130253	0	0.00371485	0.00919826	0.171446	0
CG31777	0	0.0291293	0.0358039	0.0175263	0.0129911	0	0.432698	0.0150562
cutlet	0	0.00586519	0.017182	0.0637475	0.101709	0.0343676	0.0122462	0.0729501
CG31955	0.93295	0.822808	1.29954	0.262664	0.335157	0.370205	0.550541	0.308775
CG2818	0.317708	0.279942	0.35458	0.240223	0.154487	0.259951	0.290037	0.328703
Shaw	0.0838504	0	0	0	0.00695923	0	0	0
CG10019	0.173785	0.354929	0.0533078	0.0586437	0.0123861	0.0483009	0.121907	0.139206
CG43707	0	0	0	0	0	0	0	0.00650407
CR43704	0	0	0.00591311	0.00431071	0	0	0	0.00509406
bowl	4.72586	1.31395	1.10577	0.452155	0.407854	0.519856	0.439431	0.589709
bark	0	0.00763191	0	0.0178138	0.0057103	0	0.0150502	0.146602
Reph	0.423387	0.65175	0.61276	0.24566	0.657734	0.778176	0.539041	0.536256
CG3407	0	0.09266	0.0617218	0.0381866	0.0358419	0.0792315	0.0509613	0.0319869
slp1	0	0	0	0	0.0136334	0	0	0
CR44078	0	0.00691601	0	0	0	0	0	0
CG3964	0	0.015307	0.0432233	0.0103742	0.0485996	0.00529924	0	0.0222981
Cep97	0	0.186612	0.117071	0.104495	0.0494398	0.0857536	0.0109821	0.0910152
CG31957	0.424613	0.34886	0.269627	0.235194	0.282135	0.17629	0.264611	0.192096
capu	0	0.120923	0	0.0498772	0.0155119	0.00348638	0.165368	0.121107
CG15422	0	0	0	0	0	0	0	0
ed	1.33101	2.7246	2.11537	2.36861	1.132	1.20959	1.90247	2.92994
CR44984	0	0	0.00867774	0.00373274	0	0	0	0
Sr-CI	0	0	0	0	0.00438853	0	0.204103	0
CR45791	0	0.0104722	0	0.0108129	0	0	0	0
CR44057	0	0.00592002	0	0	0	0	0	0
TBCC	0.622148	0.498206	0.567019	0.336234	0.283869	0.301055	0.350721	0.318171
lectin-24Db	0	0	0	0	0	0	0.3184	0
CG3714	1.26939	0.623835	1.14429	0.620333	0.534778	0.354015	0.38357	0.209683
ft	0	0	0.00902832	0.00902341	0.00473438	0.00262426	0	0
CG3702	0.882505	0.795814	0.818733	1.06727	1.08554	1.16724	1.49586	0.8295
RpL40	14.5067	27.9038	27.815	36.8467	36.6085	39.2092	31.1968	41.9008
CR44608	0	0.00959133	0.0128069	0	0.0224902	0.0105944	0.042291	0.0154636
CR44058	0	0	0	0	0	0	0	0
Art2	0	0	0	0	0	0	0.0126056	0
tutl	5.98512	0.238506	0.0825828	0.246361	0.13877	0.235375	0.360706	0.198552
bdl	1.00256	0.148341	0.145148	0.157901	0.0737711	0.0564834	0.576917	0.0644806
Atet	0.832386	0.588392	0.805276	0.335284	0.21811	0.492809	1.33125	0.617342
Traf4	0.844468	0.294537	0.468055	0.238217	0.328594	0.323925	0.567399	0.947892
CG17612	0	0.0666562	0.0600111	0.0809687	0.0569736	0.0627155	0.0730059	0.0183426
Vps53	0	0.078615	0.146181	0.0583304	0.092945	0.0653898	0.101205	0.110779
Psf2	0.174171	0.287503	0.172415	0.275136	0.281822	0.179244	0.184295	0.166427
Tps1	0	0	0	0	0.00320362	0	0	0
CG3652	1.35132	0.766207	0.854039	0.609784	0.652273	0.56782	0.56934	0.633092
l(2)k05819	0.06027	0.220756	0.146345	0.180907	0.230349	0.172903	0.211818	0.166365
CG33003	0	0	0	0	0	0	0	0
Dim1	0.578442	0.760979	0.849928	0.5899	0.699908	0.520841	0.395437	0.43349
CG15431	0	0.0084639	0	0.00576879	0.00301126	0	0	0
Sfp24F	0	0	0	0	0	0	0	0
CG15432	0.979489	0.60917	0.627844	0.466471	0.538067	0.285709	0.607647	0.365519
morgue	0.686062	0.263849	0.149785	0.116041	0.16198	0.225344	0.312552	0.157066
Elp3	0.284314	0.165762	0.140685	0.185486	0.157929	0.0950123	0.122034	0.12013
MFS18	0.153445	0.179491	0.130584	0.0840248	0.0961848	0.0571527	0.0465165	0.122772
CG15439	0	0.0355498	0.0491017	0.052422	0.0762598	0.0458856	0.128001	0.0737771
CG15440	0.976919	0.355737	0.388394	0.241694	0.28055	0.296367	0.135884	0.352566
ND-B8	0	0.0174342	0	0	0	0	0	0
Gs1l	0.578252	0.889871	0.639589	0.939404	0.751904	0.489214	0.835451	0.830274
RpL27A	32.2476	57.9274	54.505	76.1692	75.6593	78.1519	66.2222	86.325
mRpL27	1.18282	1.78953	1.78099	1.83574	1.65521	0.966188	0.70281	1.00782
CG15435	0	0.0782896	0.0615821	0.0503481	0.0254205	0.051396	0.0286778	0.0188424
CG15443	0.236963	0.20643	0.238076	0.141421	0.181457	0.187742	0.156306	0.154179
CG15436	0	0.0498523	0.0812665	0.0684394	0.0515898	0.00459913	0.0505582	0.0291903
FIG4	0.0867002	0.0312088	0.0787223	0.0378138	0.0237175	0.00791938	0.0558992	0.00932569
dpy	0	0.0195042	0.0228504	0	0	0.0086356	0	0
HP6	0	0.0371983	0.0098056	0.0227393	0.0026587	0	0	0.0142765
CG3251	0	0	0	0	0	0	0	0
Taf12L	0	0	0	0	0.00957352	0	0	0
CG3294	0.229922	0.103908	0.153592	0.122213	0.0755246	0.135522	0.0669864	0.193975
Clect27	0	0	0	0	0	0	0	0
CG15629	0	0.0490266	0.0124248	0.0356525	0.184205	0.522811	0.407333	0.480963
CG3225	0	0.0146362	0	0.0145979	0	0	0.0379927	0.0170099
CG15628	0	0.2749	0.0167145	0	0.00591221	0	0.0268549	0
Fnta	1.00826	1.02041	0.989637	0.838779	0.906878	0.78348	0.781581	0.592856
Ir25a	0	0	0.0047807	0	0	0	0	0.00516873
tank	0.594426	0.332891	0.457459	0.168866	0.189321	0.175217	0.294869	0.15085
CG12194	0	0.0298777	0	0	0.00186209	0	0	0
mxt	1.7435	0.614387	0.621234	0.317474	0.304515	0.552173	0.598534	0.354417
CG11927	0.360746	0.237864	0.260502	0.119783	0.149094	0.20981	0.0857972	0.113807
mRpS2	0.520345	0.532867	0.458792	0.803786	0.549848	0.453757	0.669444	0.345302
Mon1	0.667997	0.163412	0.137752	0.143492	0.0806081	0.0775516	0.205466	0.123492
smog	0	0	0	0.00340989	0	0	0	0
Cf2	0.402327	0.25702	0.218469	0.140249	0.0619067	0.163515	0.254117	0.187764
CG3008	0.445649	0.604231	0.429841	0.347625	0.363329	0.431987	0.49007	0.308118
CG15625	0	0.019381	0	0	0.00365347	0	0	0
CR45716	0	0	0.00608177	0	0	0	0	0
CG3036	0.3937	0.181759	0.0845757	0.338776	0.0229632	0.0619188	0.138818	0.0725839
CG2837	1.49988	0.106078	0.773017	0.379299	0.661596	0.218298	0.0848072	0.0691471
hoe1	0	0.0547884	0	0.0417199	0.00633708	0	0	0.108444
hoe2	0	0	0	0	0	0	0	0
CG14044	0	0	0	0	0	0	0	0
mRpL24	0.522152	0.988764	0.867402	1.23159	1.07853	0.738255	0.8796	0.46681
betaggt-I	0.757725	0.26375	0.234926	0.269228	0.242902	0.170263	0.187215	0.221282
jet	0.28055	0.150108	0.227913	0.0601835	0.0217859	0.0670899	0.070259	0.0517716
Jon25Biii	0	0	0	0	0	0	0	0
Jon25Bi	0	0	0	0	0	0	0	0.0062224
Marcal1	0.06027	0.222448	0.103491	0.0775799	0.141095	0.0630596	0.117128	0.0351782
CG34124	0	0	0	0	0	0	0	0
CR43824	0	0	0.0137106	0	0	0	0	0.00382078
CG34125	2.28007	1.99844	1.86038	0.954176	1.3588	1.18297	1.24768	0.616393
eIF3i	4.10892	4.99973	4.25338	5.38196	5.2544	4.64033	4.2743	4.23341
Scox	0.867043	0.932124	0.620784	1.0838	0.952074	0.451773	0.834284	0.540795
CG3756	0.06027	0.188688	0.0625722	0.291309	0.215758	0.0417987	0.166392	0.116414
l(2)05714	0.320813	0.402786	0.503672	0.450144	0.378221	0.198934	0.417552	0.238944
CG14043	0.0867002	0.173627	0.0931092	0.179461	0.19752	0.140002	0.263979	0.167164
mRpL28	0.882012	1.17997	1.02298	1.23949	0.996836	0.920056	1.06779	0.663652
Gmd	0.153445	0.20611	0.184788	0.265575	0.25124	0.248459	0.223667	0.165668
CG3792	0.434642	0.624456	0.379299	0.507851	0.570403	0.737788	0.273066	0.544184
CG8891	0.363978	0.906353	0.686249	1.00631	1.11874	0.510628	0.555398	0.651005
CG8892	0.58484	0.444635	0.599458	0.414963	0.435077	0.4576	0.483724	0.354451
CG34126	0.471408	0.478215	0.349492	0.197845	0.1481	0.220239	0.119063	0.0880318
Rtnl1	3.21325	1.58284	1.31985	0.970277	1.2418	0.942707	1.43568	0.904797
CG3887	1.03749	2.57599	2.72626	2.12424	2.15158	1.88291	1.41055	2.24492
vkg	2.77806	2.44007	0.586847	4.3805	3.80532	7.17312	7.69794	3.48067
Col4a1	4.46203	6.84029	1.6689	13.6422	11.8466	19.7443	20.8208	10.6536
CG31650	0.40338	0.409967	0.600516	0.186475	0.322619	0.287689	0.218901	0.25879
CG9121	0	0	0.0167536	0.0181781	0	0	0	0
eIF3h	1.32674	2.90761	2.54728	3.06331	2.70774	2.85506	2.60755	2.86444
senju	0.0838504	0.115215	0.148287	0.100866	0.0945523	0.118061	0.183942	0.139241
CG14036	0.0899928	0.232711	0.0911337	0.0408487	0.0665973	0.00791938	0.0309311	0.0367136
His3.3A	4.00577	6.68719	4.89459	7.41159	7.60709	6.45636	5.17773	4.69875
CG31918	0.06027	0.288279	0.149645	0.245989	0.217544	0.784971	0.609938	0.311281
Rpn11	1.37139	2.23821	1.90308	2.97293	2.58315	2.22042	2.71426	1.95188
CR45291	0	0.015142	0	0.0396882	0	0.00895445	0.0135259	0.00923433
qtc	0.12054	0.473438	0.110934	0.931811	0.0665634	0.0262655	0.687113	0.62082
CR43820	0	0	0	0	0	0	0.0116391	0
CR45305	0	0	0	0	0	0	0	0
RpL37A	15.4765	18.9973	21.0936	25.028	29.601	32.9422	22.205	39.5217
pgant5	0.564351	1.19476	1.51411	0.643468	0.308209	0.181902	0.304059	0.35518
CG5828	0	0.133935	0.105784	0.11228	0.108592	0.146994	0.117241	0.0865723
CG4230	0.386274	0.273812	0.206976	0.164958	0.171557	0.176264	0.239162	0.346667
ND-13A	2.17129	2.12299	1.78339	1.97523	1.84526	1.76166	1.62685	1.6312
Msp300	8.00655	2.38106	2.7688	3.14962	4.04291	6.44123	9.9478	4.39175
Cyp28d2	0	0.0211367	0	0.0126247	0.022728	0.00364063	0.0135259	0.0158853
Cyp28d1	0	0.0291795	0.0259616	0.0112151	0.00386568	0	0	0
TpnC25D	0.0899928	0.0244563	0.0156459	0.0166383	0	0	0	0
tkv	1.14083	1.64131	1.82738	0.526613	0.358196	0.0855658	0.213545	0.177724
CR14033	0	0.0642098	0.0664624	0.0862699	0.0742537	0.0121301	0.058119	0.022699
Cyp4ac2	0	0.0287215	0.00861057	0	0	0	0	0
Cyp4ac3	0	0.0476747	0.0865006	0.00358172	0	0	0	0
Bsg25D	1.10993	0.272401	0.334283	0.197732	0.162856	0.236227	0.270096	0.30906
Bub1	0.0867002	0.0918359	0.152294	0.134549	0.127115	0.146929	0.117585	0.143171
vri	0.948363	0.273758	0.694403	0.152833	0.122234	0.21979	0.455784	0.314686
CG14024	0	0.00439096	0.0132856	0.00603608	0	0.00586525	0	0
Ncoa6	1.84599	1.33218	1.4633	0.86947	0.648891	1.05331	1.00116	1.12766
CR44985	0	0	0	0.00424294	0	0	0	0
cype	6.20835	7.99287	8.72294	8.04157	5.89402	5.29147	5.79628	6.04973
CG14022	0	0	0.0142757	0	0	0	0	0
TotM	0	0	0.0658517	0.0321949	0.0194568	0	0	0
CG12512	0.330138	0.389689	0.527835	0.223777	0.136321	0.128485	0.30375	0.180821
H15	0	0.00606808	0	0.00490829	0.00614366	0	0	0.0169668
mid	0	0.128673	0.00364434	0.121966	0.0103457	0.00802492	0.0116391	0.149584
CR45287	0	0	0	0.00490829	0.00312681	0	0	0
CG7382	0.847876	0.50502	0.512138	0.446303	0.434858	0.298001	0.420641	0.346598
cl	2.60656	2.87898	3.05015	2.48666	3.02293	2.35149	2.37208	1.87596
Vps52	0.234055	0.125423	0.0849648	0.0624815	0.0964527	0.12171	0.279186	0.119467
CG6907	0.0870853	0.476442	0.452111	0.356489	0.551429	0.377669	0.256324	0.368713
CR44793	0	0.0110148	0	0	0	0	0	0
Cap-D3	0	0.052803	0.0396177	0.0431761	0.0351355	0.0614587	0.0295744	0.0306383
CG31648	0	0.455523	0.239406	0.378377	0.285341	0.218801	0.169665	0.196484
CG31915	0.0771784	0.192127	0.0380937	0.211784	0.123205	0.282652	0.317027	0.254301
CG7277	0.413988	0.5666	0.413589	0.289851	0.291507	0.223665	0.367354	0.197014
tomb	0	0.0356135	0.00262871	0.00490829	0.0290648	0	0	0.00675862
CG14015	0	0	0	0.00569698	0	0	0	0
Hel25E	2.94997	4.25558	3.19038	4.86501	4.67066	3.89146	2.39544	2.90011
Lam	0.946519	2.80501	1.4717	2.67286	2.98579	2.1808	1.8263	1.49505
Oscillin	0.407316	0.415283	0.321297	0.329101	0.377948	0.441756	0.250291	0.220208
CG18269	0	0	0	0	0	0	0	0
GluRIIA	0.0838504	0	0	0.0115376	0	0	0	0
GluRIIB	0	0	0	0	0	0	0	0
Cyp6a16	0.113379	0.101807	0.0638477	0.0260024	0	0.016467	0	0
Hsp60C	0	0.300908	0.487069	0.0731563	0.00886621	0	0	0
CG7236	0	0.00423536	0.028685	0	0	0	0	0
sip1	0	0.0909087	0.0339531	0.108636	0.0629057	0.0781977	0.0478443	0.0501731
CG11030	0.260734	0.487886	0.315086	0.32777	0.493131	0.220659	0.250322	0.289899
CG11147	0	0.0405836	0.0176561	0.00446125	0.0057103	0.011495	0	0.037363
CG11029	0	0.00808454	0	0	0	0	0	0
obst-E	0	0	0	0.00478817	0.00438853	0	0	0
CG9171	0.411138	0.203228	0.37411	0.153796	0.193971	0.214658	0.189831	0.143412
CR31912	0	0	0	0	0.00299968	0	0	0.00564973
CG14005	0	0.244581	0.151329	0.103036	0.113461	0.18997	0.0781542	0.154606
CG7239	0.313772	0.248551	0.236289	0.150572	0.123989	0.158122	0.0960635	0.068624
CG11034	0	0.0118024	0	0.0175669	0	0	0	0.010655
CR44576	0	0	0	0	0	0	0	0
TrissinR	0	0	0	0	0	0	0	0
rau	0.784383	0.372442	0.41135	0.406738	0.541378	0.555899	0.40513	0.770457
CG43185	0	0.00437675	0	0	0	0	0	0.00526417
CG9029	0	0.00910521	0.0374654	0	0	0	0	0.00398283
Acp26Ab	0	0	0	0	0	0.0117844	0	0.00601096
Acp26Aa	0	0	0	0	0	0	0	0.00299702
bchs	0.0838504	0.0586591	0.019581	0.0324079	0.0324192	0.126734	0.121778	0.0970272
Sfp26Ad	0	0	0	0	0	0	0	0
Gpdh	1.53628	0.467047	0.495253	0.324335	0.301585	0.235849	0.324462	0.213853
CR44986	0	0	0	0	0	0	0.0135259	0
CG9044	0.306715	0.226298	0.187367	0.0547499	0.108176	0.117178	0.0428178	0.140405
CG13999	0	0.0110379	0	0	0	0	0	0
CG13998	0	0	0	0	0.00440314	0.0169859	0	0.0101522
Vm26Ab	0.0867002	0.44193	1.42188	0.501813	0.330205	0.339066	0.0714442	0.18533
Vm26Ac	0	0	0.0127456	0.00478817	0.00260627	0	0	0
Vm26Aa	0	0.0914706	0.307836	0.170334	0.114757	0.201333	0.185741	0.0659951
psd	0	0.0297022	0.113771	0.0711357	0.0390102	0.0104964	0.0635046	0.425567
CG13992	0	0.0512966	0.0220998	0.118018	0.0361634	0.0157449	0.050731	0.194932
Ucp4C	0.12054	0.013566	0.0241667	0.101004	0.131544	0.0399811	0.0253606	0.0670265
Ucp4B	0	0	0	0	0	0.0160975	0	0.00516873
CR43465	0	0.0344267	0.0644694	0.0336747	0.0119911	0.0141726	0.0177668	0.0208037
chic	12.8764	18.6011	37.3536	14.316	17.3836	11.5161	8.92992	10.1165
eIF4A	15.9491	20.3239	18.7302	20.5012	24.5869	27.2917	28.4731	30.1552
ifc	0.279232	0.517779	0.430607	0.330557	0.500161	0.345534	0.323968	0.343732
lid	0.572692	0.89108	0.773354	0.687624	0.516631	0.850997	0.77091	0.727334
Tsp26A	0.314474	0.286598	0.210603	0.117931	0.115571	0.189443	0.328065	0.210419
Gal	0	0.0141119	0	0	0	0	0.0163282	0
CR43866	0	0.00673092	0.00933301	0	0	0	0	0
CG9098	1.11688	0.176209	0.307649	0.120813	0.0963896	0.0156156	0.146047	0.137655
H2.0	0	0	0	0	0	0	0	0
CG9107	0.197718	0.65865	0.266952	0.788277	0.827189	0.353449	0.440293	0.431306
mtm	0.720941	0.444967	0.389175	0.309104	0.375244	0.369788	0.285519	0.313348
CG9117	0	0.089589	0.0784461	0.0734397	0.115946	0.0423991	0.0951521	0.0600566
CG31643	0	0.0552923	0.115833	0.0446485	0.0504592	0.0381038	0.0803028	0.0618852
ade2	0.3937	0.398782	0.342156	0.350548	0.27413	0.07398	0.192521	0.182442
slmo	0.163879	0.15809	0.211954	0.0462669	0.0799173	0.0629134	0.050264	0.0496635
CG12393	0.381044	0.813673	0.539446	0.380162	0.491959	0.390477	0.5522	0.396706
CG9135	0.241057	0.599458	0.888048	0.78881	0.905047	0.915895	0.593571	0.833802
CG13995	0	0	0	0	0.0066244	0.0160975	0	0
CG34180	0	0	0.0100085	0	0.0188264	0.00263199	0	0.0237871
ND-51	1.76023	2.31679	2.07603	1.61935	1.64089	1.44564	1.4817	1.51729
CG13994	0.310008	0.484501	0.406108	0.416355	0.401499	0.415977	0.360207	0.235706
Fbw5	0	0.0844425	0.0672652	0.0235771	0.0184319	0.0293844	0.0122462	0.0125544
CG9147	0.237295	0.157189	0.168849	0.11144	0.16356	0.178364	0.199458	0.0972131
CG9150	0	0	0.0098056	0	0	0	0	0.00507608
Pfdn1	0.960482	1.3955	1.04369	1.57723	1.73522	1.1116	1.10321	1.20279
CG9154	0.170936	0.323839	0.206348	0.30516	0.255923	0.313479	0.342367	0.18797
Kr-h2	1.32496	1.6155	1.67014	1.26811	1.35221	1.98646	1.49787	1.43509
CR9162	0	0	0	0	0	0	0	0
CR44773	0	0.0119975	0	0.0129467	0.0132445	0	0	0
Kr-h1	0.458464	0.245054	0.160632	0.130991	0.125701	0.255245	0.228302	0.21346
CG9175	0	0.103537	0.0561295	0.155867	0.129321	0.12809	0.20943	0.127521
stai	3.83667	5.98624	9.03706	2.84137	5.37	5.32508	5.88041	7.50983
CG31642	0	0	0.0098772	0.00428439	0.00824411	0	0.0380766	0.00526417
Arpc4	1.86994	2.59482	2.30405	2.06174	2.28281	1.93944	2.06133	1.86472
WDR79	0.167171	0.24616	0.245981	0.156779	0.238081	0.263902	0.218113	0.122051
CG13991	0	0	0	0	0	0	0	0.00704409
smal	0.229922	0.0703797	0.237537	0.0291593	0.0120019	0.00263199	0	0
Ddr	0	0.0128248	0.0381472	0	0	0	0	0
PDZ-GEF	0.153445	0.353526	0.225461	0.202458	0.231439	0.315071	0.238015	0.119312
Pez	0.142837	0.0844372	0.106118	0.09749	0.061381	0.0687842	0.116566	0.137815
Cpr	1.0406	0.402848	0.308844	0.364436	0.165712	0.331006	0.341302	0.443599
CG9498	0.142837	0	0.00262871	0	0	0	0	0.0268672
CG9505	0.142837	0.175258	0.24588	0.355316	0.226876	0.0322932	0.0880704	0.00928829
slam	0	0.0368878	0.0417085	0.10204	0.115617	0.017743	0	0.0057233
DIP-epsilon	0	0.123259	0.135551	0.0488982	0.0381384	0	0.0395846	0.00892241
CG13982	0	0.00423536	0	0	0	0	0.0163282	0
Tig	0	0	0	0	0	0	0.00816411	0.0054451
Fic	0.497447	0.149817	0.196778	0.129132	0.0792944	0.216569	0.280538	0.146281
CG9527	0.681891	0.0940931	0.0426115	0.0291729	0.0657075	0.0586441	0.13926	0.0325704
retm	0.200079	0.130928	0.0822897	0.064794	0.0737143	0.085401	0.0295744	0.107084
frj	0.625635	0.285761	0.413648	0.207775	0.241028	0.196041	0.365658	0.194291
CG16947	0.431855	0.198643	0.240493	0.022389	0.0612927	0.0723619	0.0419051	0.0628093
CG9531	0.225634	0.185539	0.0744	0.143757	0.0828734	0.127237	0.0880898	0.165503
mmy	0.474061	0.251568	0.34598	0.0623439	0.134433	0.149069	0.13124	0.13579
CG9536	0	0.091705	0.127741	0.0753351	0.0520618	0.0584631	0.0868648	0.117875
Sec61alpha	1.40915	1.98927	1.66316	2.5427	2.33811	3.00599	1.51933	2.06638
CR45463	0	0	0	0.00469652	0.00326102	0	0	0
Daxx	0.0838504	0.364083	0.404196	0.252794	0.195394	0.314153	0.337768	0.257895
KFase	0.163879	0.0293208	0.0100085	0	0.0106007	0.00770686	0	0
epsilonCOP	1.38636	1.56007	1.34096	1.69283	1.77302	1.7447	1.71022	1.53262
Phf5a	1.32388	0.916609	0.746924	0.903458	0.981273	0.600616	0.471	0.643596
CG31638	1.04674	0.199646	0.284212	0.068566	0.176391	0.245692	0.207235	0.104964
CG9547	0.06027	0.419421	0.544769	0.499391	0.471816	0.324992	0.438882	0.273144
CG31637	2.11343	0.441348	0.841062	0.363472	0.536748	0.846479	0.547046	0.638785
eya	0.228869	0.824528	0.523592	1.18706	1.41576	0.976083	0.524099	0.310618
CR44776	0	0.0288799	0.0046905	0.0735966	0.0211527	0	0	0.0191745
IFT52	0	0.00484774	0	0.0142042	0	0	0.0142887	0.0132062
COX5B	5.00453	7.56978	7.13756	9.3068	6.47711	5.34983	5.51407	4.97178
CG9596	0.227441	0.45764	0.305008	0.629993	0.510027	0.443715	0.312319	0.295603
Ent2	1.32737	2.32133	1.66647	2.49429	2.04977	1.07775	1.6821	1.07468
CG13766	0	0.0974856	0.071185	0.049394	0.0208487	0.0644083	0.0251281	0.0386102
CG11050	5.23833	3.65317	5.86167	1.90693	1.13021	0.933665	1.34291	0.966119
DIP-iota	0	0.0170917	0.0165998	0	0.00182229	0	0	0
CR44913	0	0.0202084	0.0287818	0.0151703	0	0	0	0
Oatp26F	0	0	0	0	0	0	0	0.0119462
CG31635	1.47499	1.01688	1.69801	0.509732	0.338622	0.429144	0.960471	0.29632
Tango1	0.197229	0.434632	0.406668	0.531788	0.382238	0.367363	0.490683	0.515578
CG31633	0.161029	0.0980063	0.11977	0.0461409	0.0423724	0.0464448	0.106297	0.0341924
CG31636	0	0	0	0	0	0	0	0
CG11070	0	0.098365	0.124552	0.158282	0.147713	0.146709	0.140944	0.136733
CG13771	0	0.0228532	0	0	0	0	0	0
CG34310	0.153445	0.065324	0.0425394	0.0582528	0.0432539	0.0694146	0.0416496	0.0993671
Galt	0.324106	1.01288	0.736341	0.961601	0.914578	0.513866	0.506677	0.358359
Spn27A	0.544111	0.504249	0.34409	0.351182	0.823735	0.865226	0.569835	0.832581
cort	0	0.0369981	0.0550645	0.0504848	0.0416275	0.0136132	0.0454399	0.0339067
Nse1	0	0.333737	0.265416	0.175554	0.233087	0.186295	0.166656	0.1644
Nhe3	0.534394	0.237363	0.316356	0.142499	0.107937	0.101226	0.183663	0.248479
CG11327	0	0	0	0	0	0	0	0
Tsp	0.370653	0	0	0	0	0	0	0
AkhR	0	0	0	0	0	0	0	0
Aatf	0.50788	0.433408	0.359402	0.597754	0.402509	0.131426	0.253422	0.181949
homer	0.482798	0.163556	0.221869	0.119762	0.14061	0.191643	0.173169	0.20062
Liprin-alpha	0.14412	0.270389	0.163644	0.220036	0.206208	0.125309	0.193756	0.218552
TTLL3B	0	0	0	0	0.00333082	0	0	0
CG11221	0.0838504	0.0300085	0.00698896	0.0089441	0.0039542	0	0	0
CG11322	0	0	0	0	0	0	0	0
LUBEL	0.0838504	0.0186821	0.00612553	0	0	0	0	0
nrv1	4.24622	2.22356	2.50937	0.718558	0.391885	0.333007	0.593342	0.279386
nrv2	1.49465	1.16511	1.31339	0.398112	0.189799	0.22124	0.242442	0.291009
CG17375	0	0	0	0	0	0	0	0
sens-2	0	0	0	0.00340989	0	0	0	0
Rca1	0.0771784	0.268321	0.25078	0.161178	0.176039	0.152957	0.227155	0.136402
l(2)k09022	0	0.166887	0.0410146	0.18042	0.109119	0.0321975	0.117446	0.0968285
Nlg2	0	0.0334588	0	0	0	0	0	0
CG13773	0.344584	0.438064	0.236099	0.703443	0.459516	0.182143	0.428664	0.244237
Rat1	0.142837	0.233043	0.270962	0.215742	0.26639	0.1871	0.292788	0.262189
Wee1	0	0.193118	0.153	0.104638	0.111107	0.0794452	0.127542	0.0696421
x16	0.390793	0.686995	0.453761	0.786292	0.900166	0.666635	0.578242	0.591644
CG32829	0	0.0108951	0.00681574	0.0161782	0.03396	0	0.042291	0.00318126
nop5	1.76236	1.79222	0.764923	3.39015	2.2657	0.903161	1.67861	1.75292
snoRNA:nop5-x16-a	0	0.0119975	0	0	0	0	0	0
Hrb27C	7.99587	9.07204	8.20908	9.19205	9.44036	8.87339	8.05873	8.89749
CG43232	0	0	0	0	0	0	0	0
CG18304	0	0.00809481	0.00407101	0	0	0	0	0.00398283
Fgop2	0.694326	0.350236	0.338049	0.158994	0.202495	0.247105	0.488201	0.24878
ihog	0.393975	0.146539	0.168128	0.137869	0.107657	0.102192	0.116487	0.114622
Gas41	0.374613	0.300189	0.260753	0.23624	0.287611	0.128861	0.234959	0.162565
SA	0.290893	0.263897	0.100244	0.103315	0.161191	0.0858634	0.139945	0.0621423
CG13775	0	0.0361219	0.0137273	0.0217264	0.0454271	0.0338356	0.014146	0.0530533
CG3430	0	0.0375133	0	0.0676287	0.150207	0.0446516	0.0324088	0.0763057
Atac1	0.214627	0.169899	0.207905	0.0981029	0.140455	0.111272	0.302464	0.174137
CG10399	0.230623	0.171713	0.0628908	0.203167	0.124478	0.201063	0.166329	0.100563
sip2	0.153445	0.300636	0.302388	0.303103	0.611951	0.263017	0.0990058	0.116156
Coprox	0.510261	0.416755	0.408391	0.295034	0.32935	0.207077	0.32327	0.133527
smt3	11.5857	15.3027	11.7819	16.8264	16.8018	13.236	10.4924	12.3064
snRNP-U1-70K	0.682973	0.608419	0.420804	0.684662	0.687943	0.366499	0.455369	0.480265
uif	0	0	0	0	0	0	0	0
CG43322	0	0.0390755	0	0	0.00130313	0.0152148	0.0227093	0.0219409
ade3	0.141784	0.271787	0.21352	0.457566	0.301334	0.298164	0.160018	0.237207
Pcp	0	0	0	0	0	0	0	0.00933291
CG31908	0.650961	0.480757	0.552569	0.348346	0.462129	0.441504	0.312745	0.259973
MME1	0.0899928	0.191308	0.152931	0.31958	0.219754	0.151114	0.208647	0.157621
Rab30	0.313387	0.181967	0.220941	0.0564194	0.138869	0.14226	0.225136	0.113005
Caper	2.19938	1.56975	1.85453	1.3093	1.0575	1.05825	1.1153	0.901806
milt	0.517144	0.382385	0.448011	0.213344	0.203557	0.316078	0.597204	0.209173
Mnn1	1.35069	0.767128	0.903488	0.320533	0.251634	0.359127	0.344405	0.48304
Sem1	2.09087	1.89586	1.72471	1.81662	2.25056	2.32026	1.45586	1.94867
Nuf2	0.141784	0.281562	0.274737	0.169089	0.424576	0.190168	0.178811	0.0944292
Pvf2	0	0.0903769	0.357203	0.0224401	0.0232889	0.0752744	0.391121	0.0227191
Pvf3	0.06027	0.00487155	0.00819707	0.0352193	0.192231	0.415791	0.65276	0.113105
MICU1	0.423916	0.165298	0.178863	0.142748	0.107133	0.202005	0.21076	0.204859
CG4496	0.0899928	0.111479	0.137815	0.0270801	0.0554586	0.143007	0.106641	0.050595
CG4497	0.06027	0.0362616	0.0259443	0.0191085	0.0752316	0.108633	0.0718654	0.0952432
CG4502	1.48198	1.44735	0.906737	0.822562	0.90573	1.00319	1.26577	1.30289
CG13784	0.735456	0.617621	0.640483	0.213034	0.236688	0.311237	0.510049	0.442736
mEFG1	0.0867002	0.328479	0.184625	0.33034	0.245201	0.0539899	0.0771276	0.107887
CR44989	0.0771784	0	0	0	0	0	0.0691506	0
Ndae1	0.06027	0.0345176	0.0991635	0	0	0	0.0489847	0.0153569
CG13786	0.0867002	0	0.00427887	0.0051007	0	0	0	0.0560347
Wnt4	42.6501	10.442	6.75486	1.25414	0.321506	0.014846	0	0.065318
wg	1.56816	0	0	0	0	0	0	0
Wnt6	50.1919	1.66219	0.168364	0.219732	0.0182348	0	0	0.0196261
CG5149	1.9336	0.767983	2.02085	1.11654	1.48631	1.01057	0.507504	0.515879
gudu	0	0	0	0	0	0	0	0.00526417
CG5160	0	0	0	0	0	0	0	0.00398283
CG5171	0	0.0106128	0.0477102	0	0	0	0	0
CG5177	0.0838504	0.00605286	0	0	0.00442207	0	0	0
CG5181	0.430059	0.652526	0.540501	0.499303	0.533165	0.63421	0.554436	0.571276
CG15818	0	0	0	0	0	0	0	0
chm	0.176693	0.113654	0.143134	0.073125	0.118044	0.0931862	0.194558	0.10171
CR43857	0.0867002	0.0394862	0.02447	0.0226831	0.0397966	0.0121293	0.0632675	0.0139189
muc	0.583446	0.753847	0.576719	0.558422	0.415673	0.420908	0.40321	0.375604
CG5958	0	0.00662259	0	0	0.0177201	0	0.073477	0
CG5973	0.283567	0.0851603	0.640746	0.0734825	0.0211312	0.00263199	0.122462	0.0508869
santa-maria	0	0	0.139117	0.085347	0.0284833	0.0433513	0.0774978	0
CG6055	0	0	0	0	0	0	0	0.00318126
Ziz	0.167701	0.054484	0.0645976	0.058974	0.103789	0.0492647	0.132488	0.0557886
Obp28a	0	0	0.0129969	0	0	0	0	0
RapGAP1	2.95775	2.11396	2.95318	1.36342	1.79226	3.03268	2.16689	4.20969
CR46063	0	0	0	0	0.00499017	0	0	0
CG6739	0	0.00509157	0	0	0.0061785	0.00526397	0.364357	0.0210205
Tep2	0	0.011975	0	0	0	0.00364063	0.0216921	0.0149177
Tep3	0	0	0	0	0	0	0	0
CG13795	0	0	0	0	0	0	0	0
CG7154	1.05772	0.83016	0.659856	0.627698	0.655995	0.536333	0.401504	0.454162
CG7149	0	0	0	0	0	0.00586525	0	0.0119462
LKRSDH	0	0.0285073	0.0386096	0.0304736	0.0282517	0.041012	0.0398849	0.0171013
Herp	0.781888	0.32658	0.439475	0.204882	0.157002	0.281302	0.581403	0.18888
r2d2	0.374372	0.496686	0.304738	0.458231	0.567281	0.553066	0.536232	0.360588
cdc14	2.03226	0.710411	1.06523	0.504729	0.494243	0.578184	1.28525	0.487946
LanB1	7.2793	2.54395	2.72422	3.7565	4.85211	6.18317	7.08564	2.43037
CR45008	0	0	0.0062277	0	0	0	0	0
CG7115	0.367635	0.395307	0.419099	0.128483	0.0836255	0.16804	0.0778692	0.0877383
Rack1	7.60559	22.9785	19.2484	32.0205	32.7297	35.589	29.2893	34.3828
mts	7.00285	6.91397	7.04102	4.42336	4.86145	5.39938	5.1476	4.60289
CG14535	0	0.00809481	0	0	0	0	0	0
spz3	0	0.0170805	0	0.0172742	0.00463252	0	0	0.00731436
CG7102	0	0.0588195	0.0388099	0.0207398	0.020761	0.0260319	0	0.0303167
SmE	1.71024	3.34105	3.01505	4.01936	3.83185	2.50071	1.77591	2.26077
CG34132	1.55417	2.03966	1.35862	3.27265	2.29201	1.44519	1.584	1.63052
Snoo	9.91801	1.00249	1.39678	0.531803	0.684144	0.838127	0.868453	0.461426
CG7231	1.51625	0.29168	0.324475	0.18434	0.245818	0.201598	0.282894	0.330629
pes	0.221299	0.449457	0.777303	0.332541	0.258454	0.170381	0.259439	0.154577
CG7227	0	0	0	0	0	0	0	0
CR44996	0	0	0	0	0	0	0	0
Sirup	35.6834	17.2571	51.9972	9.39569	7.80354	10.3549	23.9111	2.90235
Wwox	0.164264	0.154693	0.35768	0.225838	0.211662	0.325885	0.567243	0.178571
Spn28Dc	0	0.137194	0.43045	0.123183	0.0799242	0.0342588	0.0163282	0.0030354
CG12560	0.200464	0.642714	1.12175	0.81268	0.420953	0.262488	0.371921	0.311487
CG34010	0	0.104769	0.157802	0.216428	0.164356	0.0652425	0.0534876	0.145194
Tg	3.10233	0.0121921	0.0311816	0.0101002	0.00442207	0.00723112	0	0.0485248
CG7367	0	0	0	0	0	0	0	0
baf	3.16403	3.26573	2.22024	3.19848	3.95772	2.97904	2.94701	1.90634
Cka	1.82024	1.0894	1.04194	0.480493	0.509753	0.710116	0.757379	0.699772
CCDC53	0.225634	0.131606	0.16992	0.110593	0.0739454	0.05749	0.228507	0.133655
RpL36A	15.894	30.2364	24.2166	43.1378	39.8955	43.37	37.2822	45.584
snoRNA:Psi28S-2648	0	0	0	0	0	0	0	0
CG7466	0.0838504	0.0999827	0.0431021	0.0155512	0.0431001	0.00263199	0.0238788	0.0615308
poe	1.14116	0.791969	0.816606	0.690051	0.524042	0.674131	0.882697	0.76872
MED20	0.154357	0.221586	0.227573	0.164633	0.176282	0.174147	0.134169	0.145513
Trf	0.179986	0.165956	0.188312	0.19754	0.199472	0.149046	0.198113	0.180889
Mcr	0	0.0761676	0.0333633	0.0909261	0.0857171	0.0521525	0.12098	0.161187
Bsg	4.31067	2.90614	2.76222	1.83287	1.52428	2.21432	3.61985	2.77743
mon2	0.248114	0.123938	0.17194	0.12615	0.128729	0.0970682	0.108183	0.132668
CG8673	0	0	0	0	0	0	0	0
CG12375	0.763043	0.396514	0.43615	0.306076	0.346949	0.35788	0.358099	0.258354
CG8668	0.710333	0.488215	0.346892	0.32525	0.234869	0.281333	0.296132	0.362234
PAPLA1	0	0.137658	0.0829782	0.108062	0.0979507	0.141876	0.202605	0.135734
CG43394	0	0.0628433	0.122944	0.0309196	0.0108914	0.0103818	0.0264559	0.0132231
Rbsn-5	0.320616	0.361412	0.223971	0.16278	0.141284	0.196087	0.228589	0.166673
CG8498	1.85965	0.686533	0.489508	0.980276	1.14322	0.949525	1.08223	1.33666
Piezo	0.14412	0.0950593	0.0700324	0.0474634	0.136302	0.488872	1.27939	0.237928
CG34134	0	0.0676298	0.109338	0.0383894	0.0474076	0	0.0147328	0.0155879
CG8475	0.226687	0.21553	0.0888317	0.0981275	0.0935693	0.0561641	0.12557	0.0693495
CR44116	0	0	0	0	0	0	0	0.00801002
CG8460	0.167171	0.385205	0.522528	0.388466	0.572363	0.45846	0.201559	0.750849
PGAP5	0.745243	0.118633	0.0826932	0.109696	0.143116	0.0968374	0.0109821	0.172999
SLC5A11	0.266824	0.0649816	0.0561665	0.00603608	0.0180759	0.00262426	0.0204103	0.0262398
CR44119	0	0	0.0295168	0	0.00412393	0	0.0215525	0
CG8419	0.113379	0	0	0	0	0	0	0.00933291
Su(var)205	3.74792	5.2261	4.56982	5.36683	5.42248	4.32623	3.36452	3.42721
Ssb-c31a	1.19939	2.58701	1.44413	1.98985	1.74421	1.22111	1.36553	1.26306
CG8372	1.28325	1.32508	1.61098	0.988789	0.988403	0.99245	1.24492	0.924308
CG8360	0.484008	0.269478	0.201893	0.132639	0.0777759	0.168282	0.13319	0.16235
CG8353	0	0.109922	0.111954	0.0356537	0.0286324	0.0215657	0.0801533	0.113078
CG8349	0	0	0	0	0	0	0	0
CG8292	0.113379	0.148796	0.225453	0.0507472	0.00824433	0.00263199	0.00816411	0.0200575
Snx6	0.67439	1.05995	1.27019	0.870075	0.765271	0.806212	0.98975	0.714473
Pvr	0.113379	0.508129	0.707105	0.251606	0.187068	0.0880274	0.197465	0.270032
CG8086	0.0838504	0	0	0	0	0	0.0257149	0.00704409
Btk29A	8.20309	2.71192	3.033	0.669393	0.494284	0.528723	1.18994	0.751539
wol	0.874714	0.568292	0.813301	0.518892	0.520303	0.58473	0.393686	0.476637
Scgalpha	0	0.00741268	0	0	0	0	0	0
CG7840	0.154357	0.352	0.271715	0.302157	0.278621	0.301725	0.206743	0.219558
Ostgamma	1.02052	1.89126	1.52845	2.06833	2.13384	3.12555	2.33265	2.25086
Mettl14	0.224149	0.249861	0.179813	0.141248	0.204239	0.187004	0.183148	0.201926
CG7810	0.308384	0.16311	0.138453	0.133988	0.114847	0.0989816	0.196935	0.144481
CG7806	0.367418	0.110636	0.14832	0.0669151	0.0790846	0.114095	0.187162	0.045696
mtsh	0	0	0.00749963	0	0.00126913	0	0	0
CG7787	0.688888	0.944477	0.780783	0.716873	0.723419	0.555182	0.509419	0.438945
CG7781	0.284419	0.0830585	0.019587	0.228148	0.0306201	0.0353167	0.147475	0.0199069
CG14275	7.48592	0.286512	0.089945	0.454692	0.117776	0.0416883	0.200814	0.0703956
CG14274	0.0867002	0	0	0	0	0	0	0
CG7778	0	0	0	0	0	0	0	0
Mur29B	0	0	0	0	0	0	0	0
CG7627	0.06027	0.236214	0.257963	0.133252	0.171658	0.313867	0.620827	0.199523
RpS13	16.6371	22.5328	25.2968	29.3642	31.3954	37.4196	26.1729	41.3154
CSN8	1.62266	1.56227	1.21121	1.37152	1.32856	1.05594	0.859319	0.956366
Pp2A-29B	2.59243	1.99927	2.3403	1.00858	1.483	1.18321	1.4815	1.27692
CG17292	0.0867002	0.514985	0.501633	0.231544	0.245411	0.174045	0.211338	0.188066
Wdr82	0	0.352711	0.444585	0.256911	0.359761	0.40581	0.263428	0.271314
CG13390	0	0.214556	0.260251	0.21124	0.165883	0.135962	0.275827	0.131332
CG17294	0.503944	0.393408	0.290139	0.243412	0.225307	0.312542	0.183665	0.290099
AlaRS	0.862144	0.792234	0.782784	0.981345	1.08681	0.49702	0.645573	0.873079
CG13392	0.1734	0.26721	0.165786	0.166358	0.173202	0.10949	0.0800409	0.0978385
Rcd4	0.170551	0.201794	0.135004	0.179222	0.216328	0.275827	0.147138	0.228027
Dad1	1.14268	2.33217	2.838	2.39421	2.7405	3.44264	2.65645	2.65981
CG13384	0.370653	0.327335	0.404305	0.171229	0.0769196	0.0925056	0.402841	0.181846
CG42819	0	0	0	0	0	0	0	0
snRNA:U6atac:29B	0	0	0	0	0	0	0	0
Peritrophin-15a	0	0	0	0	0	0	0	0
CG13386	0	0	0	0	0	0	0.00816411	0.00398283
CG31898	0	0.0893679	0.0475853	0.0459964	0.0645116	0.00611836	0.0126056	0.034692
fy	0	0.0943178	0.0491902	0.0074176	0.0330649	0.0104712	0.0380766	0.0801381
CR44991	0	0.0156197	0	0	0.00312681	0	0	0
emb	1.36589	0.956938	1.02608	0.976354	1.07544	0.845043	1.19177	0.82567
CG13397	0.14412	0.221069	0.172322	0.0808006	0.0450028	0.0427793	0.0103104	0.0512907
CG13398	0.0867002	0.220301	0.285497	0.0759768	0.0887283	0.0712369	0.146355	0.0743649
Akap200	6.02401	10.4033	13.7503	3.64535	3.01397	2.229	1.21401	2.19563
grk	0	0.186133	0.174778	0.0411552	0.0547254	0.0305338	0.0453988	0.0319177
D12	0	0.115801	0.0594201	0.0503614	0.11946	0.0308924	0.126239	0.105312
Chrac-14	0.173843	0.785838	0.502392	0.696878	0.881673	0.293442	0.415557	0.440253
mus201	0	0.198773	0.0245452	0.102827	0.0643022	0.0564342	0.0348005	0.0653633
CG31897	0	0.0186834	0.0250746	0.0114635	0.00804655	0	0.00816411	0.00394546
U26	0.0870853	0.0674147	0.076745	0.0849233	0.0680323	0.0241434	0.0466448	0.121787
fu12	0.749126	0.237572	0.171577	0.0888109	0.154406	0.226534	0.0489188	0.0465059
fu2	0.161029	0.25629	0.108013	0.188764	0.169869	0.201103	0.16875	0.154457
d	0.260928	0.343925	0.922405	0.272865	0.0672486	0.00793122	0.0268549	0.0117491
CheA29a	0	0.121143	0.256691	0.0354327	0.00149932	0	0	0.00318126
CR43604	0	0	0	0.011468	0.00553494	0.0195138	0	0.00776388
CG13088	0	0.0285066	0.0134854	0.0331819	0.0403615	0.0427646	0.0493079	0.0211166
CG43400	0	0	0	0	0	0	0	0
Dh31	0	0.00778496	0	0	0	0	0	0
CG13096	0.521605	1.25181	0.505096	1.81094	1.62275	0.585657	0.911172	0.941892
CG13097	0.390793	0.482174	0.183417	0.592349	0.402397	0.212023	0.349205	0.332195
PIG-U	0.620055	0.395173	0.37723	0.217288	0.391173	0.252844	0.234605	0.2675
mRpL51	0.427905	0.569903	0.74721	0.751949	0.642847	0.360552	0.381984	0.451927
Uba4	0	0.15863	0.1875	0.122196	0.203897	0.121942	0.113602	0.118643
CG13091	0	0	0.0047807	0.00373274	0.00969429	0	0	0
Acer	0	0.0626757	0.0208565	0.00362015	0.00635984	0.00263199	0.0244923	0.00526417
CG17834	0.798072	1.05542	1.16305	0.549622	0.159535	0.169126	0.356517	0.2647
Sema1a	0.525141	0.967703	2.02322	0.492011	0.466076	0.406078	0.148017	0.648572
Glt	0	0	0.0115726	0	0.00632355	0	0.0653129	0.00650407
CG9289	0	0	0	0	0	0.00586525	0	0
PrBP	0.471789	0.53498	0.604437	0.40297	0.43746	0.513775	0.279597	0.596996
Trs23	0.214627	0.260228	0.335209	0.291223	0.190178	0.329759	0.295829	0.324211
Hnf4	0.683262	0.785496	1.31773	0.340506	0.241923	0.447915	0.440569	0.382912
CR44992	0	0	0.00979909	0	0.00386568	0	0.0152834	0
raw	0.801879	0.248982	0.421686	0.216857	0.250276	0.77067	1.40956	0.174102
SoxN	0	0	0	0	0	0.00945429	0	0
CR44414	0	0	0	0	0	0	0	0
CG34398	1.92427	0.121471	0.0121095	0.127308	0.241778	0.0631644	0.219399	0.0646198
CR46071	0	0	0	0	0	0	0	0
CG9510	0	0.105964	0.039516	0.0412309	0.0301035	0.0144163	0	0.0617492
CG9515	0.06027	0.174286	0.0801909	0.310028	0.189904	0.0591148	0.102954	0.141387
C1GalTA	0.0838504	0.190015	0.136329	0.17351	0.115208	0.529116	1.00055	0.249735
CG31886	0	0.0830199	0.0761852	0.0472495	0.0297981	0.0614481	0.0755124	0.048053
CG9541	0	0	0	0	0	0	0	0
CG13101	0	0.0160331	0.00475323	0.0230992	0.00507377	0	0.0290057	0.0397638
rost	0	0.292412	0.450289	0.230771	0.0823962	0.0372291	0.159879	0.142023
CG9555	0	0	0	0	0	0	0	0
alien	1.09692	0.978614	0.855424	0.922412	1.06338	0.73599	0.743162	0.762483
CG18661	0.316485	0.293891	0.149102	0.275308	0.295151	0.325427	0.215705	0.14634
Try29F	0	0.0661495	0.0357585	0.0317839	0.0411784	0.0336721	0.0177668	0.0151312
CG13102	0	0	0	0	0	0	0	0
Rcd-1r	0	0.0184794	0.00742413	0.00578655	0	0	0	0
CG32982	0.762168	0.070635	0.0311682	0.0719673	0.0531382	0.0875427	0.0577214	0.0416992
CG13108	0	0.00993167	0	0	0	0	0.011078	0
CG9586	0.340555	0.769783	0.59634	0.748537	0.767123	0.759189	0.708279	0.677689
tai	1.20809	0.853604	1.2258	0.931855	0.595261	0.706119	0.943371	1.1092
aust	0	0	0	0	0	0	0	0
CR43734	0	0	0	0	0	0	0	0
borr	0.06027	0.507036	0.279387	0.585672	0.96724	0.441945	0.344523	0.257357
Ggamma30A	0	0	0	0	0	0	0	0
Cks30A	0	0.413265	0.573358	0.440684	1.04268	0.549034	0.307571	0.167043
Eaat1	0	0	0.00925396	0.00568437	0	0	0	0
Shawl	0	0	0	0	0	0	0	0
Aldh	5.05072	4.83196	4.43264	1.53896	1.59248	1.27131	1.80145	1.09309
CG4438	0	0	0	0	0	0	0	0
Mco1	0	0	0	0	0	0	0	0.00197267
FucTB	1.11874	0.663361	1.13652	0.43958	0.702398	0.365287	1.50379	0.11431
scat	0.290893	0.112297	0.125749	0.0983574	0.0869494	0.119806	0.122196	0.0711733
CG3769	0	0.0141119	0.00364434	0	0	0	0	0
numb	0.829894	0.382325	0.214796	0.221053	0.115099	0.183172	0.365634	0.24125
Gdi	1.21397	1.14387	1.50235	1.26471	1.38835	1.79991	1.78343	1.8171
CG33298	1.46859	0.338536	0.394926	0.153272	0.302949	0.426969	0.235186	0.517471
Oatp30B	3.01769	0.167271	0.160071	0.0943267	0.085483	0.109472	0.153694	0.164029
CG31883	0.167171	0.00578875	0	0	0.00388412	0	0	0.019445
CG17855	0	0	0	0	0	0	0	0
Cpr30B	0	0	0.00624925	0	0	0	0	0
jp	0.0838504	0.00572748	0	0.00642632	0.00309882	0	0.158589	0.0226158
CR44149	0	0	0	0.00431071	0.00363589	0	0	0.00865638
CG3838	0.463915	1.13212	2.18141	1.0453	0.648344	0.485541	0.859271	0.716779
Mtpalpha	0.758507	0.90922	1.03896	1.03832	1.14937	0.958047	1.68051	0.909602
CG31709	0	0	0	0	0	0	0	0
gcm	0	0	0	0	0	0	0	0
Trx-2	2.67626	3.64703	2.15581	4.58188	5.18722	6.01943	7.31346	4.61897
GlcAT-S	0.501264	0.0505116	0.0994756	0.0634767	0.0396011	0.0642235	0.0341281	0.139748
Pka-C1	1.00718	1.19394	0.846935	0.478939	0.403999	0.505954	0.946929	0.907833
hoip	2.62662	4.57154	1.20861	8.19038	4.29222	1.759	4.18801	2.59426
pelo	0.451291	0.553357	0.38235	0.634355	0.595999	0.632791	0.581129	0.380494
CG31710	0.908447	0.497347	0.966554	0.585855	0.570431	1.01406	0.8445	0.677752
CG4364	1.65651	1.31656	1.14657	1.87427	1.62064	1.28317	1.63444	1.73352
CG13117	0	0	0	0.00533518	0	0	0.365125	0
zf30C	0.376772	0.437677	0.441678	0.370594	0.395599	0.375601	0.237061	0.339127
Taf11	0.822786	0.314339	0.265436	0.334548	0.300094	0.359918	0.307338	0.2576
und	2.06713	1.62048	1.37358	1.90448	1.8388	1.8428	1.92248	0.94196
CG4017	0	0	0.0211706	0	0	0	0	0.00525151
CG17633	0	0	0.00773428	0	0	0	0	0
IP3K1	0.344249	0.194332	0.362588	0.117018	0.0768019	0.092738	0.300872	0.0713056
CR18854	0.41543	0.530092	0.480283	0.436635	0.542401	0.940717	1.40472	1.22472
CG4036	0.284419	0.384735	0.217677	0.436974	0.468686	0.338503	0.317806	0.214738
CG13123	0	0.0893253	0.114697	0.0253481	0.0280758	0.11741	0.140445	0.0469633
nAChRalpha6	0	0	0	0	0.00598845	0.00770686	0	0.00704409
FKBP59	1.33808	2.88178	2.11637	3.31588	2.59609	2.40429	1.68525	2.27151
CG34183	0.176693	0.23669	0.206398	0.152662	0.188626	0.117843	0.0762038	0.186816
CG4537	0.0867002	0.0789359	0.105529	0.0906215	0.0673487	0.0950004	0.0462075	0.0569475
mtDNA-helicase	0	0.0725644	0.0997162	0.164703	0.0544577	0.0724082	0.0381319	0.0983246
Uhg2	0.698803	0.889917	0.595268	1.12173	0.872844	0.643995	0.718939	0.847459
Bka	0.761755	0.416787	0.347701	0.41492	0.417438	0.185349	0.440515	0.28126
RpS2	28.5437	57.2585	42.0429	90.2978	79.3212	81.4402	69.1956	81.9693
Muc30E	0	0.00552579	0.036122	0.00362015	0	0.0141726	0.0150502	0.00318126
CG13124	1.51935	0.196097	0.401526	0.114472	0.0716017	0.31347	1.59961	0.173748
Etl1	0.229537	0.228097	0.138303	0.293855	0.241969	0.268989	0.151254	0.198971
Srp54	1.35788	0.821127	0.578114	0.841622	1.00931	1.02266	0.742626	0.706122
yip2	1.13081	0.762935	1.61468	0.777782	0.869511	1.28106	1.78187	0.851453
CG5885	1.01248	2.46609	1.45956	3.08498	2.83384	3.43062	2.38728	2.65337
CG4598	0.710671	1.09977	1.13302	1.32118	1.49602	1.07864	1.52953	0.92082
CG4594	0.321769	0.311063	0.336482	0.200825	0.178262	0.189782	0.149351	0.210469
CG4592	0.0899928	0.192284	0.187235	0.0970038	0.108478	0.0465346	0.116045	0.0972404
CG42366	0	0	0	0	0	0	0	0.00398283
CG42367	0	0	0	0	0	0	0	0
Cpr30F	0	0	0	0	0	0	0	0
CG31712	0.981545	0.75548	0.666687	0.691249	0.500234	0.482706	0.555449	0.549538
CR45007	0	0	0	0	0	0	0	0
Apf	0.153445	0.512656	0.414878	0.35267	0.362718	0.314307	0.162423	0.417653
CG4619	0.0899928	0.112215	0.0754165	0.140736	0.116158	0.0887269	0.0103104	0.0527303
CG5853	0	0.0482766	0.0476738	0.0124869	0.00613602	0.151591	0.0966744	0.0170657
CR45949	0	0	0	0	0.00501925	0	0	0
CG13126	0.173785	0.103745	0.102156	0.213026	0.127763	0.0740341	0.0450148	0.103228
CG4709	0.141784	0.137295	0.139906	0.118217	0.174822	0.103771	0.0846979	0.116983
CG5846	0.170551	0.247557	0.197596	0.0940861	0.0980615	0.0836671	0.310207	0.18171
CG4658	0.67308	0.489796	0.520266	0.245864	0.310229	0.213239	0.267249	0.131229
CG5850	0	0.100404	0.126645	0.0843753	0.0463797	0.0645919	0.151855	0.0741438
CR43683	0	0	0	0	0	0	0	0
Dref	0.0899928	0.290921	0.200008	0.291866	0.344005	0.280138	0.114689	0.214724
RpL13	11.3574	18.2632	14.9604	28.0213	26.7289	26.9774	22.2533	28.8016
CR13130	0	0	0	0	0	0	0	0
bib	0.0899928	0.258308	0.38798	0.158304	0.355144	0.842635	1.52531	0.304399
CG31875	0.480558	0.0785759	0.142039	0.0566439	0.0634892	0.0449082	0.0446246	0.0440451
SoYb	1.40313	0.576039	0.483218	0.289855	0.316147	0.161364	0.300956	0.232295
CG4747	1.03167	1.20252	0.895815	1.81086	1.73645	1.11431	1.07754	0.979119
Trp1	2.59954	2.66393	2.60308	1.51757	1.41428	2.36426	2.36076	2.25252
obst-B	0	0	0	0	0.00633708	0	0	0.00564973
Pen	0.910397	1.78559	1.3621	2.16862	4.20576	3.00792	2.40109	1.55478
Spn31A	0.961114	0.0623903	0.0246964	0.00917868	0.00280246	0.0103013	0.0524887	0.00299702
CG4839	0	0	0	0	0	0	0	0
Sur	0.898418	0.107936	0.227361	0.0583678	0.0592307	0.0866267	0.0645614	0.036696
CG31874	0.0899928	0	0	0	0	0	0	0.00373388
Ripalpha	0	0.253707	0.287469	0.169274	0.187269	0.0563164	0.206402	0.114727
RpL7	21.932	47.6501	37.5249	65.4287	66.8246	70.7494	62.9985	73.7789
CG34159	0.902932	1.60665	1.75415	1.12101	1.2538	1.8075	1.92027	1.30599
CG5734	0.856586	0.586183	0.567034	0.298707	0.467183	0.579451	0.613784	0.267838
CG5731	0	0	0	0	0.00472773	0.00263199	0.0183255	0.00968533
CR44845	0	0.0242167	0.00580413	0.00373274	0.00494124	0	0.0668042	0.0665074
CG5727	0.474486	0.393275	0.34462	0.133187	0.187223	0.210024	0.21547	0.217588
CG4901	0	0.0597963	0.0361561	0.0678157	0.0655333	0.0630961	0.0414522	0.0966741
Npc1a	0.648259	0.335634	0.589598	0.454888	0.458062	0.575555	1.32689	0.392635
Prosalpha6	2.3925	2.95632	2.41906	3.85596	4.33763	3.50699	3.32299	2.59953
CG4908	0.0867002	0.336874	0.399841	0.277908	0.265857	0.320034	0.221988	0.332829
CG5708	1.43244	0.631475	0.832096	0.224574	0.386028	0.358712	0.245879	0.39005
CG5694	0.929171	0.499591	0.649694	0.399199	0.357197	0.443977	0.526112	0.38626
eEF1delta	3.81744	5.68568	3.81479	8.59845	7.38854	4.36425	4.61184	4.48612
mthl15	0	0.00873125	0.0385213	0.0264743	0	0.00770686	0	0
me31B	1.82739	2.01228	1.36694	1.92184	1.81471	1.79547	1.56441	1.43973
chico	0.142837	0.333901	0.436608	0.152561	0.140769	0.15221	0.18343	0.0872731
bsk	1.11587	0.740226	0.765297	0.485776	0.550969	0.614887	0.555615	0.451948
CG31717	1.78978	0.934185	0.998845	0.627895	0.757061	0.934348	0.860645	0.997954
Ror	0	0.0247247	0	0.00553172	0.00125417	0.00348638	0	0.00641421
CG5676	1.97142	3.6077	3.77687	2.99656	3.52679	2.41634	2.35804	2.23825
Pten	0.314141	0.250438	0.274002	0.128867	0.159029	0.106413	0.21744	0.18977
Rsf1	3.20542	2.50372	2.80916	2.1132	2.41882	2.91748	2.72222	3.16218
REPTOR-BP	4.26409	2.95678	5.12515	1.1986	0.978901	1.28202	2.05458	1.19659
Mob3	1.13405	0.741138	0.515209	0.4701	0.392228	0.366124	0.345912	0.210815
CG4953	0.390408	0.158311	0.207745	0.0748651	0.100016	0.0849552	0.150088	0.0738674
CG4957	0.153445	0.127787	0.135921	0.195272	0.112249	0.0865093	0.174657	0.165654
Mulk	0.0899928	0.457408	0.353683	0.574172	0.375071	0.327186	0.292124	0.275484
trk	0.0771784	0.078846	0.015939	0.00511856	0.00828384	0	0.014146	0
Utx	0.476983	0.253863	0.305143	0.165619	0.123354	0.17434	0.347867	0.17645
CG34043	0.0870853	0	0.00570608	0.00579771	0	0	0.0109821	0
Ufd4	0.598592	0.460895	0.59877	0.362443	0.385401	0.47618	0.438977	0.403759
CYLD	0.746656	0.131617	0.23103	0.0722008	0.0604568	0.149546	0.216323	0.113227
CG13138	0	0	0	0	0.00327197	0	0	0
nmd	1.41955	1.26195	1.04489	0.990442	1.02205	0.735551	0.904142	0.931476
CG5390	1.64522	2.08389	2.63852	0.881667	2.09592	2.43158	2.44602	1.66939
CG4968	1.34257	1.61655	1.58041	0.919607	1.13033	0.974704	0.915403	0.90924
Cdk5alpha	0	0.0871416	0.0444461	0.0365944	0.013932	0	0.040817	0.00776388
l(2)SH0834	0.666559	0.678755	0.678652	0.493776	0.529127	0.462866	0.773279	0.627095
Usp14	1.17384	1.32507	1.24276	1.38179	1.26273	1.17005	1.17792	0.927447
CG4972	0.531249	0.54661	0.507669	0.716783	0.702122	0.576905	0.44806	0.576455
CG5381	0.234055	0.123231	0.0535779	0.0395903	0.012879	0.138412	0.25082	0.178645
CG4995	0	0	0	0	0	0	0	0
RnrL	0.0771784	0.262044	0.126777	0.339451	0.527406	0.127716	0.160603	0.176269
Schip1	0	0.0345459	0.0265377	0.0109672	0.00688045	0.00267497	0	0.0062224
CG5037	0.666059	0.270414	0.252186	0.426258	0.236815	0.21099	0.259642	0.281039
GATAd	0.556874	0.481175	0.390965	0.190478	0.137641	0.186691	0.381318	0.321833
SamDC	0.933704	0.405504	0.367798	0.306579	0.32101	0.322728	0.364642	0.252175
CG31715	1.73961	1.26017	1.55614	1.14258	1.39479	1.15739	0.830027	1.42769
Sps2	0.414316	0.281293	0.382669	0.230314	0.191211	0.210943	0.0993417	0.227471
CG5022	0	0.0385552	0.01733	0.026806	0.0324393	0.0110981	0.0103104	0.0147633
CG34367	0	0.00959133	0.026794	0.00523333	0	0.0260391	0	0.00885748
CG5367	4.44063	0.9261	1.35485	0.56416	0.701674	0.491152	0.290883	0.939831
CG5045	0.602584	1.55407	1.29902	1.10919	1.08736	1.01657	0.891707	1.13832
Cand1	0.0867002	0.2746	0.274672	0.266058	0.332593	0.299869	0.260136	0.273986
pim	0	0.242883	0.270872	0.19564	0.268363	0.181937	0.142101	0.16777
lft	0	0.0115898	0	0	0.0026587	0.00263199	0	0
CG5056	0.765242	0.530254	0.636529	0.2758	0.295049	0.311003	0.487985	0.313956
rho-5	0	0	0	0	0.00836806	0	0	0
CG33303	0.467586	1.70922	1.73468	1.9343	2.21758	2.78852	2.13471	2.2817
dpr19	0	0.119481	0.00833527	0.00586522	0.0165446	0.0317769	0.0222327	0.0262344
gny	0.0867002	0.168042	0.238692	0.163731	0.159967	0.193222	0.153998	0.216156
CG5096	0	0.021286	0.0393134	0.0152092	0.00736689	0	0.0387151	0.00941321
Cdk1	0.978263	1.49855	1.03922	1.50568	1.71604	1.14175	0.921932	0.923068
mRpS7	0.939997	0.885335	0.936406	1.20437	0.876216	0.732217	0.934307	0.76399
da	1.81191	0.889546	0.748369	0.655102	0.515546	0.656485	1.06613	0.674668
CR45789	0	0.0159805	0.0590076	0	0	0	0	0.00382078
Mdh1	5.72761	7.4089	11.8212	6.55353	4.34192	2.98312	2.98338	3.35814
Cnot4	0.920114	0.517918	0.429401	0.296273	0.322611	0.519415	0.676684	0.407341
Ir31a	0	0	0	0	0	0	0	0
RpS27A	30.0943	53.165	45.0498	76.3839	76.4799	80.72	62.8608	83.9583
Ip259	2.57452	4.29564	3.95454	4.09781	4.58271	5.87228	4.55661	6.78243
CG5355	0.557069	0.732669	0.592675	0.737257	0.774564	0.758407	0.571717	0.632661
Klp31E	0.40338	0.120687	0.112195	0.0694461	0.0645492	0.09282	0.102761	0.109435
RfC3	0.06027	0.229338	0.198505	0.35677	0.548769	0.185231	0.231986	0.234055
pie	0.0870853	0.11216	0.0841801	0.0361263	0.0542044	0.0511024	0.0135259	0.0399898
CG5168	2.0368	1.74275	1.8978	1.24278	1.39779	1.55825	1.20445	1.46078
SmB	1.43082	4.68243	3.40804	6.16247	6.29523	4.14366	3.69566	3.09853
KdelR	3.53373	3.13541	2.58999	3.47951	3.60197	5.40838	4.52351	4.01115
CG5188	0	0.251057	0.270254	0.318087	0.290832	0.198947	0.12225	0.164162
Bug22	0.616427	0.633618	0.550249	0.577077	0.605548	0.52754	0.521775	0.388308
TfIIB	0.755764	0.653722	0.559489	0.502954	0.445017	0.438377	0.650863	0.432922
TBC1D16	0	0.0158766	0	0.00447205	0.0128701	0.0242059	0.0540871	0.00543039
holn1	0.0838504	0.237821	0.245576	0.189581	0.241149	0.210718	0.134183	0.185857
STUB1	0.606889	0.600141	0.897984	0.306629	0.446558	0.461597	0.39472	0.525173
Nse4	0.374613	0.320188	0.469328	0.0855199	0.135988	0.162122	0.123523	0.12334
loh	0	0.0124533	0.0139728	0.00962423	0	0.00895445	0.0116391	0.0147653
ppk10	0	0	0	0	0	0	0	0
LManI	0	0.0512931	0	0.0504065	0.00440314	0.00459913	0.00816411	0.0458467
LManII	1.70773	1.09463	1.27267	0.687173	0.491995	0.427769	0.495151	0.845898
RluA-1	0	0.00669459	0.0138266	0.005179	0.00634087	0.00848683	0.0252708	0.016155
RluA-2	0.06027	0.12974	0.072073	0.142803	0.134483	0.0570269	0.120757	0.0946191
Grip75	0	0.209727	0.221245	0.101533	0.187926	0.115545	0.150095	0.117006
CG7456	0.433995	0.270182	0.247616	0.202834	0.181233	0.199147	0.200908	0.152467
CG6144	0.380202	0.247084	0.27541	0.228528	0.238887	0.266046	0.153336	0.218039
CG13144	0	0	0	0	0	0	0	0
Myo31DF	0.314526	0.721136	0.722355	0.187302	0.149133	0.268181	0.671439	0.0823636
CR44224	0	0	0	0	0	0	0.0387151	0
CG6094	0.578194	0.330133	0.430236	0.347908	0.444764	0.227918	0.323608	0.260732
CG7384	0	0.0186302	0.00612553	0.00814983	0.0039542	0	0.00816411	0
Fatp	1.12088	0.461674	0.336259	0.219821	0.132488	0.106362	0.334614	0.11679
Lrr47	0.24053	0.208363	0.111658	0.049902	0.0641195	0.0222161	0.0545267	0.0541957
Lip4	0	0	0.0100873	0	0.0663761	0.0576896	0.0408206	0
Trim9	0	0.0323821	0.0101416	0	0	0	0	0.00731436
CG17098	0	0	0	0	0	0	0	0
CG7299	0	0	0	0	0	0	0	0
CG7296	0	0	0	0	0	0	0	0
CG7294	0	0	0	0	0	0	0	0
CG17108	0	0	0	0	0	0	0	0
CG6443	0.695701	0.270632	0.192956	0.198446	0.18886	0.249162	0.397451	0.249568
CG17118	0	0.0238306	0.0163096	0	0.0189718	0.0194414	0.0215525	0
EMC3	0.941496	1.17928	0.870654	1.11547	0.958325	1.06268	0.899453	0.90093
Dpy-30L1	0.774744	0.816503	0.659086	0.597033	0.733476	0.670113	0.549634	0.587811
Nup107	0.0838504	0.742886	0.466883	0.528669	0.684272	0.3975	0.483451	0.312812
Vha16-5	0	0.00745352	0	0.0043909	0	0	0	0
CG12299	0.0899928	0.101052	0.158521	0.0784435	0.108708	0.0840653	0.134136	0.0976682
CG6729	0.602329	0.165456	0.164541	0.131804	0.145205	0.177169	0.30875	0.108078
CG17124	2.49054	4.14936	6.1815	0.893184	0.575016	0.326167	0.93589	0.675363
CG6495	0	0.01605	0	0	0	0	0	0
Ubc2	0.488175	1.13128	1.33218	0.724174	1.02545	1.29753	1.1558	1.12467
CG6724	0.608031	0.523066	0.239739	0.584891	0.488835	0.239497	0.278119	0.384675
CG17127	0	0.0341117	0	0.0198416	0	0.00348638	0.0177668	0.016579
CG31869	0	0.0356284	0.00392895	0.0781084	0.00804313	0.00534995	0.0177668	0.251374
CR44582	0	0	0	0	0	0	0	0
CR44581	0	0	0	0	0	0	0	0
Nos	0	0.0117894	0	0	0	0	0	0
CG6700	1.0555	0.836636	0.928173	0.452537	0.444886	0.732332	1.17775	0.562269
Porin2	0	0.0264922	0.0312116	0.040994	0.0121087	0.020225	0.0122462	0
porin	6.38103	10.7319	7.82676	12.2241	9.75973	7.72112	6.87632	7.04906
SmydA-3	0	0.0164612	0	0	0	0	0	0
Dnz1	0.241057	0.273856	0.300678	0.174915	0.208857	0.167647	0.305579	0.266112
aurB	0.287222	0.892697	0.673644	0.806577	1.70488	0.559729	0.559825	0.268514
Stam	0.170551	0.257873	0.208732	0.133127	0.108145	0.290382	0.38444	0.17007
CG14072	29.1984	7.99484	0.757795	0.503386	0.0936449	0.0341166	0.0366772	0.107458
CG33129	1.81851	2.11031	1.62733	2.43201	2.79337	2.17384	2.14013	2.15799
YL-1	0.764065	0.511476	0.421075	0.265615	0.327955	0.338594	0.228986	0.312265
CG16743	0	0	0	0	0	0	0.00816411	0
abo	0	0.0534331	0.0645908	0.0496454	0.0576947	0.0441722	0.0737411	0.0639636
ATPsynG	8.32845	11.6479	11.386	12.2225	11.254	8.81002	8.62668	8.59204
SCAR	0.792115	0.611561	0.5648	0.498331	0.451315	0.390222	0.567631	0.342685
piwi	2.04148	1.57162	2.06209	1.18391	1.61777	0.959663	0.55833	0.728269
CG12253	0.892183	0.24443	0.197465	0.113482	0.170325	0.119445	0.0553531	0.121662
CG16833	0.556741	0.238979	0.349325	0.333415	0.355326	0.15617	0.258002	0.184775
aub	0	0.23198	0.0402499	0.0306025	0.0317302	0.0257438	0.0152834	0.0183604
lectin-33A	0	0.0178758	0	0	0	0	0	0
RpL9	13.3229	23.8821	16.6337	34.8368	34.31	36.6352	30.3139	36.4916
Nup154	0.06027	0.24459	0.13955	0.249478	0.363106	0.137838	0.0742611	0.20543
Art8	0.210533	0.344947	0.0499967	0.291154	0.309929	0.130204	0.166482	0.160109
CR45778	0	0	0	0	0.00852908	0	0	0.00301394
dUTPase	1.92385	4.7359	3.57199	6.71402	8.81959	4.15679	3.51545	3.48015
Samuel	0.951979	0.991359	1.30892	0.968085	0.485591	0.40034	0.785672	0.407461
CG14915	0	0	0	0	0	0	0	0
AstC	0	0	0	0	0	0	0	0
AstCC	0	0	0	0	0	0	0	0
Wdr59	0.321198	0.083276	0.0532575	0.0369305	0.0301482	0.018351	0.0429626	0.0207031
Ge-1	0.153445	0.437469	0.298994	0.223197	0.245408	0.227894	0.144376	0.259073
Reps	0.602733	0.391465	0.314219	0.223967	0.164867	0.149361	0.402417	0.191311
l(2)gd1	0.320616	0.213255	0.183664	0.0607853	0.0584694	0.11081	0.156164	0.120138
CG6201	0	0	0	0	0	0	0	0
CG6230	0	0.1358	0.110898	0.193069	0.203571	0.237941	0.136203	0.150883
CG14921	0	0.0303604	0.0136142	0	0.00644056	0.0170747	0.0295744	0.012443
Csl4	0.0870853	0.528643	0.214578	0.83143	0.658661	0.165026	0.320272	0.418879
Nup160	0.0870853	0.113125	0.0975955	0.166543	0.144123	0.103753	0.143863	0.0743561
RfC38	0.387885	0.676409	0.416863	0.616346	0.967154	0.464232	0.490873	0.533179
CG4751	0	0.0773502	0.101985	0.0666051	0.040637	0.130764	0.0400903	0.10216
Gyc32E	0	0	0	0	0	0	0	0
CG6287	2.01059	1.67816	1.15124	2.14507	1.15496	1.24426	0.998403	4.8582
Ca-beta	0.0771784	0.0692363	0.00969602	0	0	0	0.0222327	0
Vm32E	0	0	0.00491888	0	0	0	0	0
CG4788	0.142837	0.164103	0.146061	0.1011	0.0947324	0.106856	0.0215525	0.12137
CR43859	0	0	0	0	0	0	0	0
ab	0.37702	1.04156	2.04699	0.527252	0.489255	0.103876	0.0939171	0.182049
cmet	0.0870853	0.230132	0.16272	0.172952	0.216761	0.101459	0.145153	0.14083
cana	0.229922	0.242822	0.399805	0.18071	0.154524	0.292336	0.389127	0.276125
CG33695	0.378176	0.455634	0.313301	0.321204	0.379356	0.215098	0.259544	0.19859
CR44182	0	0.0131847	0	0	0	0	0	0
Ppt2	0.694729	0.324637	0.37878	0.13359	0.143923	0.274956	0.375575	0.271528
mre11	0.491552	0.929967	0.958507	0.546354	0.545336	0.623466	0.653379	0.475577
salr	0	0	0	0	0	0	0	0
salm	0	0	0.0106763	0	0	0	0	0
CG43355	0	0	0	0	0	0	0	0
CG6488	0.860035	0.137154	0.0689721	0.0950405	0.0673571	0.0985286	0.17328	0.0830021
spz4	0	0	0	0	0	0	0.0331837	0
Dlg5	0.315627	0.304717	0.309237	0.0990453	0.158336	0.287032	0.217323	0.176841
CG43153	0	0.00924953	0	0.00595447	0.00123727	0	0	0
CG31705	3.84286	1.43105	2.32337	0.796997	1.09346	2.01105	4.38163	0.947708
CG31706	0	0	0	0	0	0.00848683	0.0183255	0
CR44495	0	0	0	0	0	0	0	0
kek2	0	0	0	0.00578655	0.00836806	0	0	0
CR44143	0	0	0.00900535	0.00575303	0	0	0	0
CG14931	0	0.0635651	0.0330322	0.00574361	0.0101636	0	0	0.00301394
CG14932	0.24053	0.231244	0.0467111	0.00483102	0.00433521	0	0.0109821	0.012443
CG14937	0	0.0184228	0.0179358	0.029447	0.00810057	0.00267497	0.0387151	0.0118059
crol	7.48869	4.71972	4.90551	3.55757	3.26231	3.92796	4.58655	3.34816
CycY	0.3071	0.533511	0.430896	0.370916	0.428369	0.388737	0.655667	0.336483
Pde1c	0	0	0	0	0.0039542	0	0	0.0030354
esc	0.154357	0.212945	0.116788	0.160669	0.224464	0.0266381	0.152557	0.0753261
CG31704	0	0	0	0	0	0	0	0
CG44008	0	0	0	0	0	0	0.00816411	0
Mal-B2	0	0.0721189	0.0720101	0.024893	0.0881667	0.0740782	0.0152834	0.137817
CG42751	0	0	0.0047807	0	0	0	0	0.00518206
CR43314	0.0870853	0.123095	0.0047807	0.176666	0.0672082	0.121432	0.105591	4.50637
CG6686	0.914104	0.453274	0.510538	0.323337	0.234612	0.363815	0.25218	0.386138
CG34163	0.547104	0.315302	0.470587	0.618206	0.544333	0.301061	0.29372	0.412394
zuc	0.12054	0.122235	0.0765262	0.125094	0.231856	0.0997244	0.0498131	0.10349
dgt2	1.352	0.9575	0.97233	0.901275	1.1283	0.861462	0.437086	0.764898
escl	0.0867002	0.0876249	0.0758125	0.00511856	0.00658261	0.0189744	0.0859988	0.0427832
Ada1-2	0.255162	0.0459765	0.0476047	0.0106365	0.0224498	0.024815	0.014146	0.0227509
CG18789	0.428563	0.0673421	0.0910058	0.0529827	0.06607	0.0486243	0.0748865	0.0521831
Qtzl	0.163879	0.0942948	0.10009	0.124661	0.155775	0.300565	0.0370979	0.175269
Ada1-1	0.142837	0.0395269	0.101123	0.0159428	0.0264769	0.0445256	0.0135259	0.0371356
CG18787	0.1734	0.159301	0.148478	0.145932	0.137802	0.242084	0.143933	0.147384
CG12264	0.404466	0.634525	0.561973	0.443878	0.554671	0.42513	0.438946	0.279528
CG6746	0.408469	0.777049	0.841968	0.610772	0.682405	0.757718	0.594274	0.459957
Rh5	0	0	0	0	0	0	0	0
CG6734	0	0.0490674	0.0524779	0.0498833	0.0259351	0.0501741	0.00816411	0.00322642
CR44587	0	0	0	0	0	0	0	0
dmGlut	0.0771784	0.0338333	0.0442252	0.00578655	0.0228586	0	0.014146	0
Tom70	0.0870853	0.269479	0.133671	0.153634	0.321314	0.143783	0.1962	0.106662
CG6766	0.06027	0.278849	0.35367	0.176694	0.229413	0.383139	0.184264	0.200941
CR46070	0	0.00484774	0.00731066	0	0	0	0	0
CG6785	0	0.0102745	0.020241	0.0299814	0.00310167	0	0	0.0518704
CG6770	32.3878	32.5523	66.0046	11.662	7.33856	13.8215	17.1066	19.2812
CR44589	0	0.0261837	0	0.00919008	0	0.0305804	0.042291	0.00299702
Plzf	0.14412	0.128853	0.0645762	0.0240555	0.038114	0.0444552	0.0509613	0.0355443
CG14945	0.539578	0.466039	0.699296	0.128752	0.0533017	0.0149793	0.0135259	0.0188831
JhI-21	0	0.773586	2.20946	0.458281	0.312439	0.269185	0.170109	0.252186
Rab3-GAP	0.0838504	0.10059	0.0710362	0.024848	0.0586233	0.0312707	0.0947847	0.0675651
firl	0	0	0	0	0	0	0.0408206	0.0157639
prd	0	0	0	0	0	0	0	0
Pex19	1.43227	1.75319	1.75343	1.24387	1.0658	0.846961	1.02332	0.756234
CG6712	0.441544	0.513883	0.278779	0.741981	0.73733	0.257743	0.546709	0.312542
Mt2	0	0.0581612	0.0322767	0.139112	0.0570057	0.0502511	0	0.0516917
Ced-12	0.226757	0.124494	0.0723659	0.0214525	0.0641002	0.0499806	0.14575	0.0315728
Patsas	0	0.00592002	0	0	0	0	0	0
ThrRS	0.564578	0.717743	0.962363	0.865799	1.0823	0.822024	0.846167	0.767166
Rab6	1.41523	0.849199	0.933937	0.6122	0.598102	0.908629	1.02616	0.668198
Phae1	0	0.00778496	0	0	0	0	0	0
Phae2	0	0	0.0098056	0	0	0	0	0
CG17211	0	0	0	0	0	0	0	0
CG31760	0	0	0	0	0	0	0.0142887	0
CG6583	0.0771784	0.135128	0.205913	0.073739	0.0970847	0.0957678	0.0569317	0.405624
crok	0.221299	0.581726	0.395385	0.27678	0.35567	0.325062	0.420705	0.616086
CR43356	0	0.0153421	0	0	0	0	0	0
bru1	0.444187	1.2066	0.177581	0.113066	0.137668	0.0629799	0.0741751	0.0395609
atilla	0	0.00605286	0	0.00496454	0.00613602	0	0	0
CG31759	0	0.17016	0.102544	0.135345	0.0796351	0.0881721	0.0793008	0.106618
CG31862	0	0	0	0	0	0	0	0
bru2	3.30685	0.97702	0.644275	0.78734	0.615177	0.540421	0.388239	1.51074
Pkd2	0	0.00965147	0	0.00471271	0	0	0	0
vir-1	0.653523	0.375149	0.182588	0.0298855	0.0652866	0.097194	0.244635	0.55045
CG6405	0	0.02921	0	0	0	0	0	0.0163585
CG5446	0.747257	1.1923	1.04255	0.983989	1.05083	1.0847	0.990403	1.20193
CG6388	0.360796	0.34985	0.195035	0.383154	0.237089	0.230533	0.290798	0.274861
CG5435	0	0	0	0	0	0	0	0
SC35	1.73858	3.92957	2.9992	4.36673	4.41081	3.39056	2.74858	2.66622
eRF3	0.883042	1.33897	0.897471	1.24402	1.1826	0.853883	0.998906	1.07257
Oatp33Ea	0	0	0.0103467	0	0	0	0	0.00518206
bun	6.36816	4.22902	3.78536	2.37619	1.76426	2.5724	3.55395	2.48954
CR43051	0.0838504	0.0492729	0.0384517	0.0789747	0.0159545	0.115447	0.139756	0.22087
CR42746	0	0.0133242	0.0203638	0.00586522	0	0	0	0
nub	0	0	0	0	0	0	0	0
pdm2	0	0	0	0.00753009	0.00496575	0	0	0
CCT4	2.06917	3.46892	2.7722	4.24319	4.26156	2.89648	2.90533	2.79297
CG6153	0.399052	0.22291	0.362518	0.225624	0.264717	0.0999988	0.117178	0.155949
CG5780	0	0.167743	0.111098	0.0562683	0.0618266	0.120573	0.0847496	0.0523032
PICK1	0.317323	0.0675518	0.0216662	0.00837443	0.0177957	0	0	0.00892241
CG17036	0	0.0184933	0.0137029	0.00447624	0.00613602	0.0185507	0	0.0348675
CG5776	0	0.0678809	0.0684213	0.0942349	0.0577337	0.0187691	0.0133882	0.0428001
spict	0.95944	0.66625	0.629519	0.25008	0.369233	0.547886	0.651413	0.471486
CG15484	0	0.00486385	0.0111152	0.0380223	0.0447516	0.0430537	0	0.0533278
CG6180	1.54203	2.66448	2.48972	2.82833	3.13799	2.26421	1.80656	1.87003
CG5787	0.71214	0.355983	0.311301	0.444671	0.431941	0.315746	0.300521	0.308827
Pih1D1	0.711782	0.764919	0.634301	0.560541	0.530561	0.510134	0.586874	0.516002
MRP	0.843922	0.64633	0.972426	0.600781	0.423308	0.586135	0.593829	0.290091
CR43818	0	0.0176671	0.00583782	0.00490829	0.0107593	0	0.0177668	0
kek1	4.5376	7.26574	8.07679	2.53	1.8905	1.89226	1.48742	2.76163
CR44970	0	0.0246786	0.0272692	0.051263	0.110061	0.293516	0.0147328	0.615026
CR44971	0	0	0	0	0	0	0	0.0163585
Vha68-2	2.35067	2.10201	2.63745	1.69007	1.59366	1.09536	1.13506	1.13686
Vha68-3	0	0	0.00726744	0	0	0	0	0.0128153
CG12404	1.23588	0.710276	0.741247	0.637024	0.677652	0.888476	0.491918	0.485712
Vha68-1	0	0.0896337	0.122574	0.0225127	0.0508211	0.0454584	0.0374421	0.148185
Tor	0	0.175583	0.152939	0.0792077	0.0949826	0.12471	0.047029	0.148942
CG9934	0.113379	0.323698	0.404973	0.246328	0.236624	0.224502	0.392321	0.366632
A16	0.213715	0.656438	0.529943	0.357066	0.552385	0.516256	0.376103	0.286398
CG9932	7.20565	1.79423	1.89307	1.62264	1.72307	3.84947	10.476	3.45375
CR44197	0.0899928	0	0	0	0	0	0	0.00693564
CG5142	0	0	0	0	0	0.016467	0.0545372	0.0252432
DnaJ-H	1.01949	0.558528	0.546308	0.365122	0.271219	0.562142	0.839408	0.548007
Sirt1	2.04535	1.30951	1.50262	0.932031	0.66433	1.11875	1.5673	1.00943
Sfmbt	0	0.0690087	0.0343877	0.114345	0.115842	0.0883155	0.120364	0.0573438
CR46256	0	0	0	0	0.00696316	0	0	0
CG43925	0	0	0	0.00373274	0.00591221	0	0	0
CG5439	0.330138	0.343312	0.381971	0.146548	0.103309	0.0745107	0.150462	0.0996789
CG5287	0.0771784	0.0925664	0.163297	0.0991972	0.0659665	0.162226	0.170879	0.0330933
CG31849	0	0.0320138	0.01651	0.0156164	0.0159365	0.08063	0.0325346	0.0759899
CG5458	0.0771784	0.0141163	0.0267194	0.00746706	0	0	0	0.00827443
CG16974	0.373657	0.268733	0.203499	0.27428	0.295797	0.363123	0.277283	0.275062
Edem2	0.1734	0.241154	0.183573	0.147547	0.0986171	0.208536	0.193755	0.120455
CG16972	0	0.0562118	0.105427	0.0893323	0.0958194	0.0929292	0.0390593	0.0627625
Pect	1.15425	0.41094	0.274134	0.263693	0.206824	0.265632	0.469449	0.212855
CG15482	0	0	0	0.0101195	0	0	0	0
snRNA:U2:34ABa	0	0	0	0	0	0	0	0
kek4	0	0.00811762	0	0	0	0	0	0.00776388
CG9426	0.904756	0.302216	0.282036	0.13087	0.147708	0.0842593	0.199013	0.171615
mRF1	0	0.10469	0.09831	0.101809	0.139358	0.0754478	0.0884599	0.0673689
Ski6	0.173785	0.484029	0.385819	0.965112	0.697889	0.354487	0.335558	0.339511
CG16812	0.709883	0.435515	0.366996	0.318886	0.431955	0.264548	0.401969	0.296298
CG16813	0	0	0.00900535	0	0	0	0	0
CG16820	0	0	0	0	0	0	0	0
CG44085	0.197229	0.275673	0.375443	0.116583	0.539099	1.15799	1.54973	0.11033
Drep4	0.0867002	0.252129	0.261845	0.101668	0.139841	0.151855	0.171618	0.141701
CR44083	0	0	0	0	0	0	0	0
Uvrag	0	0.74881	0.280836	0.726546	1.11531	1.44622	0.961519	0.678466
CR44972	0	0.00501211	0	0.00493706	0	0	0	0.0153074
CG31729	1.04455	0.472182	0.839843	0.273797	0.458911	0.988966	0.835454	0.82893
Nnp-1	0.842402	1.03135	0.456764	1.29791	0.993372	0.703868	0.784569	0.822069
CG6523	1.01992	2.24933	2.14161	2.39373	2.85568	2.78225	2.05229	2.13273
Tap42	0.170936	0.251007	0.395605	0.28766	0.32886	0.267161	0.088019	0.197685
CG31855	0.706889	0.663711	0.5156	0.471525	0.50612	0.485464	0.528806	0.495307
ND-B22	3.46473	4.98505	4.49883	4.1629	3.78378	3.2084	2.99621	3.08521
CG9305	0.176693	0.372379	0.245268	0.260974	0.268156	0.162125	0.267541	0.158638
CG6565	0.231206	0.171391	0.0704552	0.148217	0.13461	0.159282	0.143133	0.0721225
CG9302	0.724049	0.463765	0.494441	0.379224	0.574458	0.752796	0.436447	0.598278
beta'COP	0.390951	0.636843	0.586279	0.46449	0.593873	0.852569	0.720308	0.616313
loqs	0.669151	0.0989768	0.157628	0.0538288	0.0327626	0.0417285	0.0220601	0.102712
CR44599	0	0.0110148	0.00690886	0	0	0	0	0
Ing5	0.861118	0.597496	0.551848	0.284691	0.362091	0.418942	0.377337	0.353358
CG7099	0	0.039566	0.0227894	0.0677544	0.0368865	0	0.102092	0.0608693
RpL24	21.0052	27.0098	26.3918	35.9781	35.4411	38.9294	29.252	46.0026
CG16957	0	0	0	0	0	0	0	0
CG10859	0	0	0	0	0	0	0	0
CR44600	0	0	0	0	0	0	0	0
CG7110	0.0771784	0.377007	0.316877	0.239173	0.239819	0.193691	0.227442	0.194596
Vm34Ca	0.0771784	0.087362	0.0824009	0.130917	0.157335	0.314933	0.189312	0.767903
CG16848	0	0	0	0.0104771	0	0	0	0
CG16956	0	0	0	0	0	0	0	0.00322642
CR45683	0	0	0	0	0.00693253	0	0	0
CG9267	0.220015	0.37106	0.260113	0.371373	0.515609	0.321647	0.232794	0.337921
B4	0.0838504	0.224717	0.141615	0.0935993	0.15545	0.149419	0.27424	0.0806455
CG15638	0	0.00436947	0	0	0.00632355	0	0.0152834	0
CG9263	0	0	0	0	0	0	0	0
kuz	2.25849	3.07312	3.65587	1.50096	1.12511	1.56155	2.33907	1.931
ics	2.64755	1.25058	1.31724	0.802264	1.25517	1.67127	2.22239	1.15594
CG18507	0.0771784	0.0133083	0	0	0	0	0	0.0698907
TM9SF4	0.62434	0.35411	0.412	0.207736	0.258351	0.432567	0.487425	0.449815
CG9008	0.228484	0.269725	0.170575	0.0758408	0.00674689	0.0117305	0.0253606	0.0596549
p38b	0.45731	0.593413	0.416979	0.581849	0.610359	0.599549	0.510952	0.408077
CG16890	0.0870853	0.11107	0.1523	0.0581976	0.0442018	0.0525788	0.0904441	0.13322
CG31731	0.251349	0.106627	0.0869799	0.0481439	0.0533635	0.134516	0.152744	0.137196
CG16863	0	0.00536154	0.0103552	0.00894829	0.00926988	0.013086	0.0109821	0.0242224
Sec71	0.0899928	0.0420112	0.0050965	0.0315188	0.00646464	0.0225242	0.0590587	0.064102
CAH1	0.0838504	0.00558315	0.00925396	0	0.00550982	0	0	0.0054451
Adat1	0.0771784	0.0449253	0.0639003	0.0253815	0.0441972	0.0273169	0	0.0183848
CG16865	0	0.190604	0.239819	0.184773	0.128142	0.106006	0.100109	0.161249
CG16888	0	0.00782316	0.0843786	0.00456852	0.0227661	0.00770686	0.0295721	0.2181
Sos	0.324381	0.0955777	0.0781722	0.0593562	0.0661262	0.0319515	0.0544457	0.117203
b	0.153445	0.0219485	0	0	0	0	0	0.0498785
tam	0	0.103477	0.0512993	0.0773533	0.0611003	0.0438054	0.0808619	0.0719848
Arpc1	1.3724	0.94852	0.994402	0.774359	0.793765	0.707024	0.834963	0.684722
Orc5	0.332341	0.171865	0.0836206	0.13216	0.177901	0.0339747	0.179718	0.0558751
RpII33	0.421066	0.885534	0.619168	1.04197	0.940474	0.605972	0.4673	0.568162
mRpS23	0.920235	0.801364	0.444351	0.657377	0.569094	0.480639	0.411652	0.360621
CenG1A	0.340066	0.306647	0.315989	0.0551188	0.0614727	0.0549968	0.0543265	0.0179268
CG7916	0	0	0	0	0	0	0	0
Smg5	0.885671	0.464292	0.598574	0.350202	0.34839	0.430982	0.680009	0.608155
Ance	0	0.0274926	0.042888	0	0	0	0.130626	0
NimA	0	0.0208669	0.045577	0	0	0	0	0
NimB2	3.48561	0	0	0.0129954	0	0	0.481973	0
bgm	0.06027	0.0343945	0.0156066	0.00735289	0	0.011495	0	0
NimC3	0	0	0	0	0	0	0	0
hll	0	0	0	0	0	0	0	0
CG43332	0	0	0	0	0	0	0	0
Dyrk2	0.330523	1.08072	0.9548	0.199097	0.122372	0.116783	0.299791	0.631552
CR44727	0	0	0.0383402	0	0.0063031	0	0	0
CR44728	0	0	0.0129969	0.00447205	0	0	0	0.00288382
wb	0.465659	0.610106	1.75722	0.571122	0.922637	2.14641	4.09068	5.92505
CR44729	0	0	0	0	0	0	0	0
CG32971	0	0.0369136	0	0.0110223	0.00320362	0.00263199	0	0.0212137
ms(2)34Fe	0	0	0.0179157	0	0.00674689	0.0152136	0	0
CG33090	0.141784	0.134929	0.0915073	0.0632436	0.0270411	0.031891	0.104516	0.0436528
Send2	0	0.00989974	0.0072318	0	0.00428545	0.00787213	0.0126056	0
mTTF	0.247729	0.361299	0.279399	0.215354	0.269184	0.287671	0.197501	0.154209
l(2)34Fc	0	0	0	0	0	0	0	0
l(2)34Fd	0.0838504	0.220725	0.108689	0.200448	0.213106	0.048746	0.168443	0.096311
Rab14	1.19335	1.39608	1.71706	0.753774	0.737147	1.04433	1.54781	0.992425
CR44851	0	0.0121643	0.0120681	0	0	0	0	0
Pgant35A	0.0771784	0.119818	0.145662	0.0716037	0.0790382	0.105119	0.142747	0.0765394
CR43463	0	0.00747849	0	0.0311115	0.00589339	0	0.042291	0
spel1	0.0838504	0.152272	0.228837	0.0933487	0.0766007	0.0412816	0.0244923	0.114587
elB	0.174171	0.331012	0.631552	0.479384	0.560634	0.650872	1.55919	0.948222
CR44733	0	0	0	0	0	0	0	0
noc	0	0.328275	0.640806	0.681658	0.635391	0.740383	0.861371	0.320404
CR45693	0	0.00763191	0.0036798	0.00540282	0	0	0	0.00299702
CG33648	0	0	0	0	0	0	0	0
osp	0.760165	0.521162	0.598639	0.298383	0.220119	0.234643	0.143249	0.421283
CG34166	0	0	0	0.00831397	0	0	0	0
CG42681	0	0.00486385	0.108542	0.0980086	0.27816	0.0110981	0.0389464	0.00870075
CG42587	0	0	0	0.0578641	0.00586287	0	0	0.00581693
CR45458	0	0	0	0	0	0	0	0
mol	0.756267	0.659573	0.69677	0.295156	0.125366	0.129931	0.428259	0.115512
DCTN5-p25	0.487301	0.376395	0.365156	0.196558	0.295322	0.364041	0.650903	0.211786
l(2)35Be	0.313387	0.257399	0.203315	0.203035	0.211212	0.249336	0.275158	0.199222
NC2beta	1.48575	0.565913	0.552954	0.487155	0.503806	0.464151	0.66459	0.316349
THG	0.0867002	0.183363	0.0942134	0.140565	0.138665	0.0589357	0.138109	0.0950049
l(2)35Bd	0.0867002	0.206045	0.203685	0.146114	0.182393	0.12749	0.185349	0.204902
GABA-B-R1	0	0	0	0.0109672	0	0	0	0
yellow-c	0	0	0	0	0.0125976	0.00262426	0.0135259	0.00398283
CIAPIN1	0.848513	0.908418	0.590736	0.562945	0.685136	0.579294	0.573234	0.34575
Su(H)	0.241057	0.270374	0.177409	0.152974	0.158711	0.160963	0.303298	0.216476
ck	0.210533	0.0717853	0.0621455	0.0612179	0.0468361	0.0653854	0.0635911	0.106932
CG33679	0	0	0	0	0	0	0	0
TfIIS	0.767516	1.32054	0.973769	0.983872	1.24767	0.958849	0.850545	0.737406
solo	0	0.0625293	0.0098056	0	0	0	0	0.00299702
vas	0.202054	0.22598	0.0920179	0.0453822	0.0263173	0.0152148	0.0582237	0.016315
vig	1.38744	2.2116	2.13835	2.43886	2.39022	1.44634	1.8343	1.87372
CG15270	0	0	0	0	0	0	0	0
stc	0.237348	0.420493	0.184581	0.271973	0.262762	0.174591	0.233771	0.216323
CR43853	0	0	0	0	0.00301126	0	0	0
ZnT35C	0.06027	0.0243529	0.0140862	0.0226379	0.00946388	0.0137877	0.0366772	0.0093226
dao	0	0.0307477	0	0.0104771	0	0	0	0
Pol32	0	0.157413	0.159636	0.0644534	0.138556	0.128346	0.115765	0.0962472
l(2)35Cc	0.572706	0.235821	0.10277	0.137734	0.205153	0.257259	0.200132	0.127677
yuri	0.256215	0.0826705	0.129158	0.0466256	0.0361537	0.0197284	0.0595345	0.0266191
Cul3	0.452881	0.415225	0.444831	0.236443	0.26674	0.255279	0.339723	0.374197
UK114	0.18081	0.135072	0.0373932	0.243892	0.136956	0.0627797	0.0761395	0.137198
CG15262	0	0	0	0	0	0	0	0
esg	0	0	0.010484	0.00714262	0	0	0.011078	0.0111211
wor	0	0	0	0	0	0	0	0.00398283
lace	0.347157	0.400367	0.406156	0.183071	0.169614	0.222449	0.273208	0.157223
CG18480	0	0	0	0	0	0	0	0
CG4587	0.0838504	0	0	0	0	0	0	0
CycE	0.266824	0.225262	0.111552	0.180061	0.175366	0.0524316	0.106049	0.231338
CR44974	0	0.0187632	0	0.00603608	0	0	0	0
ND-B17	6.02928	4.02165	5.04196	3.68599	4.33071	2.92393	2.43721	4.2763
Mtr4	0.315569	0.261633	0.123982	0.281305	0.222248	0.0546457	0.121605	0.106704
Gli	0.557598	0.0825456	0.0754951	0.106628	0.0500084	0.0149398	0.011078	0.342535
CG3793	1.48881	0.704869	0.747256	0.532839	0.54096	0.594354	0.602985	0.261549
wek	0.0867002	0.0817496	0.0541794	0.073095	0.0737055	0.0238685	0.134339	0.0515385
Ku80	0.113379	0.174591	0.152683	0.0479218	0.0586962	0.0605709	0.0244901	0.0622052
Tep1	0	0	0	0	0	0	0	0
CR44868	0.229537	0.00941495	0.00681574	0	0.00503186	0.020138	0	0
beat-Ic	0	0	0	0	0	0	0	0
CG42817	0	0.0111093	0.0098056	0	0	0	0	0
PRL-1	0.256215	0.408073	0.415256	0.35084	0.454763	0.550472	0.799483	0.416631
EndoGI	1.54215	0.745275	0.791402	0.411574	0.705761	0.948478	1.14264	0.525119
twe	0.06027	0.0306106	0.00583782	0.0160497	0.0202062	0	0.011078	0.00882794
CG4935	0.341863	0.213579	0.169275	0.0900629	0.0941868	0.0687182	0.0738447	0.0697495
crp	2.18185	2.79833	3.40488	2.12801	1.80086	1.30489	1.42974	1.46367
pkaap	0.174171	0.248482	0.209201	0.0431587	0.0514455	0.126102	0.164538	0.143531
CG17329	0	0.00423536	0.0120964	0.00753009	0	0	0	0
CG13258	0	0	0	0.00569267	0.00754418	0	0	0
CR44899	0	0.00998052	0	0	0	0	0	0.00865638
Cyp303a1	0	0	0	0	0	0	0	0
heix	0.469072	0.0464991	0.0671566	0.0496999	0.0504294	0.0642484	0.127374	0.124932
CG17328	0	0.076853	0.114464	0.0252649	0.0730334	0.0268833	0.0227093	0.0369872
GMF	1.02126	0.445607	0.672455	0.299418	0.589076	0.931129	1.06926	0.87876
c(2)M	0	0.0196255	0.0106763	0	0.00499017	0	0	0
CG5861	0.886109	1.49338	1.38906	1.55908	1.61907	1.57005	1.12418	0.975391
Syx5	0.968034	0.479644	0.420926	0.289266	0.210981	0.403802	0.527666	0.250029
cni	1.36402	1.08208	1.3411	1.01993	1.52134	1.17663	1.03907	1.00049
fzy	0	0.325683	0.242124	0.519242	0.684653	0.43493	0.18826	0.286913
cact	1.22314	0.80929	1.09274	0.665744	0.726393	0.684562	0.855882	0.679446
CG4278	0.770821	0.407358	0.570272	0.481406	0.518688	0.336405	0.182293	0.282687
mRpL4	1.40944	0.845872	0.859424	1.07806	0.912082	0.420827	0.674593	0.496173
CG4440	0	0	0	0	0	0	0	0
CG31817	0	0.0947616	0.0517296	0.037811	0.00494124	0.0218777	0.0264559	0.0564479
CG42266	0	0.00437675	0	0.00438761	0	0	0	0
CG44405	0	0	0	0	0.0053982	0	0	0
CG42231	0.228484	0.062449	0.139461	0.065338	0.0561388	0.00267497	0.0879629	0.0751723
chif	0.574444	0.580047	0.502495	0.302658	0.297451	0.422938	0.439623	0.424664
CG4455	0.562263	0.569723	0.551396	0.336262	0.393823	0.770088	0.625338	1.08924
CaBP1	1.25909	1.22964	1.655	1.54492	1.80257	3.9517	2.73926	1.533
jhamt	0	0	0	0	0	0	0	0
CG5888	0.231776	0.147004	0.120409	0.0208148	0.0728237	0.0757522	0.107381	0.0573277
Idgf1	6.1682	1.30944	1.9518	0.212527	0.0485419	0	0.256052	0.00581693
Idgf2	1.03796	0.716126	0.622855	0.0602505	0.0222876	0.00791938	0.334729	0.00892241
Idgf3	3.57487	0.953154	1.11086	0.212863	0.0228133	0.0316894	0.335079	0.0473797
dac	0	0	0.00816229	0	0	0	0	0
CR44994	0	0	0	0.0110223	0	0	0	0
Tpr2	0.895076	1.04063	1.11441	0.811764	1.28088	0.805166	1.01685	0.537786
CG5953	0.0838504	0.772979	2.47576	0.888654	0.654709	0.699001	0.789328	0.714736
CR45354	0	0	0	0	0	0	0	0
CR45355	0	0	0	0	0	0	0	0
CG31816	0	0	0	0	0.00186209	0	0	0
CG42389	2.80215	2.08503	3.0951	1.2596	1.39508	1.30021	1.75958	2.58455
CG5968	0	0	0.0108238	0	0	0	0	0
CG31815	0.237295	0.133827	0.131824	0.0592445	0.0486494	0.0541582	0.0256343	0.0661512
CG4631	0.0838504	0.0204768	0.0227475	0.0141794	0.0314228	0	0.0264559	0.0344562
her	0	0.269321	0.182714	0.208348	0.203464	0.119041	0.35138	0.158016
squ	0	0.264395	0.126116	0.137463	0.201395	0.211359	0.271013	0.173075
grp	0.48488	1.42187	1.22436	0.759689	0.87038	0.658372	0.620522	0.417252
CG31807	0	0	0	0	0	0	0	0
CG33552	0	0	0	0	0	0	0	0
CR44975	0	0	0	0	0	0	0	0
CR43669	0	0.0386873	0	0	0	0	0	0
CR43670	0.0867002	0.119507	0.0462613	0.0292415	0.045471	0.0450678	0.104226	0.0559256
CG31808	9.63791	0.337318	0.290675	0.494659	1.69633	5.39521	12.0643	1.25221
Cyt-c-d	0	0	0	0	0	0	0.0387151	0.00288382
Cyt-c-p	2.88137	4.93195	2.20078	7.50498	5.34808	4.22329	4.88697	4.32862
VhaSFD	1.63588	1.40636	1.78933	1.21548	0.9963	0.647714	1.17902	0.758304
CR43671	0	0.0554179	0.00681574	0.03147	0.0282962	0.0152707	0.0481221	0.00960213
CG31812	0	0.0615627	0.0741846	0.0347544	0.0971975	0.0365055	0.0333757	0.0789442
CG17996	0.233919	0.447387	0.480883	0.388136	0.420333	0.259186	0.304583	0.158336
Prosbeta4	3.17033	4.60866	3.89749	6.50429	6.11487	5.63934	5.11437	4.30861
CG17904	0.593028	0.669335	0.635014	0.530175	0.561947	0.85293	0.595739	0.516711
glu	0.0771784	0.773013	0.376137	0.55718	0.868932	0.525427	0.445987	0.279054
ChLD3	0	0	0.00720765	0	0.00473438	0.0251418	0.0251281	0.025134
LSm7	1.72977	1.55748	1.48612	2.13198	2.24097	1.92611	0.862523	1.87581
BuGZ	1.16734	0.771133	0.884499	0.880395	0.74755	0.98656	0.830854	0.841781
yellow-b	0	0.00996311	0	0.00579771	0	0	0	0
Mhc	0	0	0	0.0139477	0.00483954	0	0	0.00518206
Cyt-b5-r	0	0	0	0	0	0	0	0
CG17928	0	0.00715258	0	0.00579771	0.00325901	0	0	0
Ugt36Ba	0	0	0	0	0	0	0	0
Ugt36Bb	0	0	0	0	0	0	0	0
Ugt36Bc	0	0	0	0	0	0	0	0
mdy	0.923008	0.275924	0.171389	0.0691464	0.174305	0.12575	0.143937	0.115353
Cse1	0.716991	0.562551	0.496216	0.669893	0.90034	0.553909	0.345354	0.431593
AspRS-m	0.621705	0.275233	0.317483	0.268673	0.245285	0.215655	0.193194	0.243731
CG13282	0	0	0	0	0	0	0	0
CG31810	0	0.0336384	0	0	0	0	0	0
CG31809	0	0.0461259	0.00933301	0	0	0.0122186	0	0.0105713
CG6012	0	0	0	0	0	0	0	0
CR31781	0.437679	0.00870571	0	0	0.0119482	0	0.0556806	0.860405
CG6115	2.08121	1.95258	1.69602	1.78472	1.86204	1.50944	1.8103	2.08293
tweek	0.203107	0.15998	0.129234	0.100954	0.114706	0.15496	0.0599569	0.148567
CR44392	0.0867002	0.0102129	0.0046905	0.0150341	0	0.0207388	0.0152834	0.00636828
CG42556	0	0	0	0	0	0	0	0
CG12288	0.0867002	0.287499	0.159446	0.468623	0.502232	0.192737	0.307441	0.317781
ApepP	0.427715	0.562087	0.608228	0.585287	0.814005	0.496468	0.50325	0.608545
beat-IIIc	0.277257	0.413826	0.252906	0.355016	0.357757	0.058238	0.0406448	0.427744
CR44396	0	0.00484774	0.0160891	0.00456852	0.00310531	0	0	0.0146479
Lrch	0	0.694884	0.603133	0.287716	0.318904	0.643018	0.701495	0.559418
CLIP-190	3.84781	2.10853	2.45269	1.08616	0.817313	0.830371	1.54713	0.589773
Rpb11	3.13404	2.44676	2.65693	1.91926	1.90299	1.47955	1.17285	1.5408
CG15141	0.296282	0.383953	0.389486	0.236264	0.37651	0.324391	0.309853	0.225645
Dif	0.257694	0.138531	0.122023	0.0111647	0.0374301	0.050395	0.160318	0.0416754
dl	1.61816	0.423997	0.530868	0.103673	0.186944	1.07032	2.03433	0.75374
CR46204	0.0899928	0.030329	0.0177633	0.00340989	0.00113159	0.0465555	0.0386024	0.0263006
CG5050	0	0.00811762	0	0	0	0.0195583	0	0
CG18563	0.0899928	0	0	0.00557715	0.00674689	0	0	0
BicD	1.39837	0.926664	0.788433	0.497886	0.625557	0.910271	1.2929	0.708987
Sgt	1.19178	2.42504	1.93103	2.18958	2.27369	1.89162	1.4219	1.43714
Aac11	1.36542	1.85488	1.75786	1.40335	1.25431	1.31305	1.57169	1.74262
fws	0.489797	0.206546	0.223893	0.159234	0.252577	0.215379	0.343727	0.170969
CG5110	1.33538	0.424692	0.514261	0.34136	0.254411	0.294515	0.350628	0.250811
GCS2beta	0.701217	0.758924	1.0741	0.912284	1.0818	1.57177	0.765673	1.21498
CG5131	0.153445	0.183644	0.107176	0.117679	0.125985	0.0475739	0.0941178	0.0703678
qua	0	0.0925869	0	0.00707224	0	0	0	0.0138737
CR45715	0	0	0	0.0104771	0	0	0	0
CG15142	0	0.0179664	0	0	0.0114262	0	0	0
mEFTs	0.439349	0.797627	0.681658	0.873534	0.693937	0.495945	0.538341	0.344587
Dhc36C	0	0	0	0	0.0102232	0	0	0.00541598
Oli	0	0	0	0	0	0	0	0
CR45699	0	0	0	0	0.00301126	0	0	0
CadN	2.53884	0.518326	0.390011	0.487787	0.474329	0.375522	0.294089	0.604096
CG5674	0.227971	0.0774239	0.162546	0.0658879	0.0893301	0.15546	0.0675617	0.157502
CG5681	0	0	0	0.00483102	0.00310531	0.00586525	0	0
elfless	0	0	0	0	0	0	0	0
rdo	0.94611	0.879645	0.0513257	0.06638	0.0136776	0.0137301	0	0.0129684
Arr1	0	0	0.012579	0	0.00579201	0	0	0
CG15153	0	0.00436947	0.00513077	0	0	0	0	0.00709851
CG44476	3.05834	1.06813	1.5105	0.680734	1.0895	0.881731	0.187191	1.14437
CG15152	0	0.0262998	0.0367787	0.0161943	0.0280318	0.0122186	0	0.174267
CG5758	4.77392	1.0789	1.19584	0.570693	0.439207	0.445964	0.563516	1.55669
kel	0	0.0669589	0.0891666	0.104113	0.0795536	0.173616	0.112134	0.0320516
Socs36E	2.41477	2.13423	3.43417	1.76279	1.20897	3.2228	4.49711	3.65764
CR44478	0	0.00517959	0.00813005	0	0	0.00267497	0	0.00382078
CG17681	0	0.00551248	0	0	0	0.00526397	0	0.00776388
CG15155	0	0.0229921	0	0.0122982	0.00186209	0	0.0142887	0.0795426
CG5783	0.28055	0.277348	0.342082	0.0952372	0.170364	0.389625	0.416229	0.190888
CG7200	0.374744	0.122317	0.0557396	0.155293	0.161794	0.178577	0.137016	0.120761
Ptp36E	0	0	0	0.00576879	0	0	0	0
CR44489	0	0	0	0	0	0	0.0151498	0
Fas3	1.63332	1.2512	2.30096	3.98565	11.9372	12.6253	1.62055	30.9234
RpS26	27.4933	42.0003	36.7795	61.0609	62.1758	65.3768	54.2377	71.3317
ncm	0.724863	1.03937	0.667569	0.719034	0.742402	0.549806	0.591368	0.686104
bsf	0.173785	0.41825	0.341106	0.498816	0.46067	0.21107	0.255357	0.250728
Ntf-2r	0	0.0494295	0	0.0223405	0.0278554	0.0180899	0	0
let-7-C	0.324907	0.0313837	0.138749	0.065426	0.027724	0.0434141	0.186834	0.0433281
CG10283	3.07215	1.12937	0.938667	0.648789	0.414183	0.469353	0.703224	1.43055
kon	0	0.102193	0	0	0	0	0	0.00197267
CG10178	0	0.00589773	0	0	0	0	0.0204103	0
Pde11	1.36321	1.22925	1.37466	0.53257	0.54539	0.531976	0.602912	0.917031
CG15160	0	0.249186	0.118008	0.0857232	0.189248	0.0917466	0.14256	0.0889765
amos	0	0	0	0	0	0	0	0
CG10413	0.290893	0.129209	0.203454	0.0824605	0.126428	0.335029	0.270428	0.276534
CG31789	0	0	0	0	0	0	0	0.00270799
CG10333	0.724723	0.638059	0.43571	0.566096	0.570216	0.577891	0.42803	0.413323
Atac2	0	0.0548211	0.111255	0.0896963	0.043439	0.0709111	0.0924123	0.0670649
MESR3	0.337722	0.663179	0.91637	0.211603	0.256545	0.192691	0.757065	0.607992
Cyp310a1	0	0.00552579	0.00243742	0	0	0	0	0
CR42490	0	0	0	0	0	0	0	0
CG43338	0	0	0	0.00373274	0	0	0	0
Mst36Fb	0	0	0	0	0.00544462	0	0	0
Mst36Fa	0	0	0.0098056	0.00595447	0.00674689	0	0	0
CG31751	0	0.135591	0.0729727	0.112589	0.116409	0.103606	0.165613	0.0577733
tos	0.167701	0.0730027	0.0616966	0.0294095	0.0432988	0.0131539	0.0407984	0.0141108
msl-1	0.684228	0.259624	0.270273	0.209718	0.177076	0.217934	0.097527	0.216348
CG10336	0	0.227948	0.13648	0.177016	0.423443	0.0836288	0.157519	0.193824
CG10383	0.243438	0.395856	0.791623	0.16686	0.128959	0.215935	0.681212	0.0565097
CG10338	0.0867002	0.0700957	0.095842	0.0841574	0.0534607	0.0373074	0.144425	0.0543808
CG10341	0	0.174512	0.0967345	0.289085	0.153031	0.130736	0.196544	0.125219
CG10376	0.895838	0.458144	0.349549	0.207341	0.186006	0.237836	0.222968	0.102999
CG10343	0.361597	0.914259	0.47903	1.03269	0.9213	0.696145	0.923278	0.741344
Jwa	2.49156	2.02715	2.50458	2.06646	2.18254	1.9963	2.03087	1.69197
Faf2	0.997314	1.09675	0.976256	0.616971	0.552523	0.693561	1.10484	0.660802
Grip71	0	0.166434	0.0969581	0.14622	0.1872	0.116348	0.154533	0.124149
Irk3	0	0	0	0	0	0	0	0
CG10348	0	0.00836635	0	0	0	0	0	0
CG17323	0.633561	0.418118	0.431311	0.112297	0.0253432	0.00791938	0	0.00943799
CG17322	0	0.00922373	0.0199312	0.033382	0.0931817	0.0756015	0	0.168588
CG17597	0.352316	0.282282	0.203351	0.18016	0.192337	0.170325	0.2704	0.137521
ScpX	0.865082	0.568069	0.600477	0.337667	0.370126	0.300827	0.541165	0.176997
CG10600	0.972285	0.788377	0.98851	0.519053	0.426647	0.40302	0.779716	0.477962
CG33120	0	0.392841	0.17595	0.0251835	0	0	0	0.00509406
CG17321	0	0.233372	0.098145	0.0253312	0.00332161	0	0	0
CG10602	0.306047	0.538122	0.432596	0.645663	0.746542	0.570691	0.572807	0.430666
mRpL13	0.324381	0.880727	0.773681	1.00917	0.80122	0.562389	0.52747	0.635982
ssp3	0.327094	0.334355	0.255873	0.206091	0.183006	0.191132	0.265976	0.329331
CG46304	0	0	0	0	0	0	0	0
CG10428	0.197718	0.18499	0.211219	0.155359	0.129416	0.180379	0.108185	0.163369
Nedd8	1.20233	2.3999	2.44272	2.80846	3.11805	1.9751	1.82027	1.62861
CG10621	0	0.013168	0.0131351	0.0202113	0	0.00728126	0	0.0491397
CR44741	0	0.00659763	0	0.015511	0	0	0	0.0166768
CG10623	1.52515	1.76789	2.85532	1.12852	0.896241	0.534502	0.682221	0.476898
Nak	0.381929	0.125951	0.163527	0.114246	0.155844	0.177867	0.313789	0.204741
Tango6	0.14697	0.130781	0.081552	0.0704737	0.0750751	0.100427	0.0223101	0.0662865
CG10639	0.230821	0.185633	0.179654	0.164304	0.13888	0.151328	0.192435	0.110505
CG10431	0.0899928	0.012381	0.0402176	0	0.00125417	0.0240357	0.0147328	0.00270799
Swip-1	0.164264	1.2076	1.41427	0.276074	0.0551534	0.100613	0.190407	0.0686719
CG15168	0.711235	0.765811	0.820803	0.909788	0.883417	0.755332	0.757673	1.08497
CG15170	0	0	0	0	0	0	0	0
CG15169	0	0	0	0	0.00273417	0	0	0
CG10650	0	0.0210322	0	0.0050049	0.00321168	0	0	0.00638885
CG31792	0	0	0	0	0	0	0	0
CG31793	0.0899928	0.0665013	0.208097	0.144204	0.0659069	0.047524	0.105769	0.0768375
RpL30	11.3035	18.1187	16.965	25.6544	26.4772	29.4756	21.9733	32.7503
CG15172	0	0.00811762	0	0	0.00442207	0	0	0.00394546
hook	0.632377	0.365693	0.372829	0.223641	0.242032	0.350765	0.409906	0.265474
CG31800	0.641295	0.319409	0.496969	0.364841	0.311699	0.245796	0.286569	0.282942
mib2	0.200079	0.243337	0.303375	0.136532	0.127604	0.160724	0.22641	0.160156
Catsup	1.07275	0.962432	0.899844	0.673511	0.850776	1.14081	0.986405	0.818272
Ttc19	0.342916	0.0808643	0.0489147	0.0589312	0.0591878	0.0848384	0.0705777	0.128047
Acn	0.579308	1.02168	1.11675	0.892158	0.916207	0.767957	0.636183	0.912722
CG10470	0.902901	1.47026	0.954286	1.98029	1.66057	1.18782	1.14834	1.36999
l(2)37Bb	0.256215	0.148063	0.0722866	0.209452	0.134297	0.0851361	0.161902	0.0949256
Rpn3	1.066	1.12704	0.959106	1.17065	1.39736	1.23915	1.74616	0.846254
CG10492	0	0.0951952	0.07382	0.101995	0.0993174	0.121575	0.0764184	0.0609257
Phlpp	0	0	0.0098056	0.00458763	0	0.0208315	0	0.00318126
CG10495	0.0838504	0.0534259	0.0314588	0.0573375	0.0845821	0.0450281	0.0526296	0.0674223
CG10702	0	0.0259905	0.0135051	0.00576879	0.0110649	0.0305878	0	0
CG17343	0.234113	0.346818	0.294446	0.283174	0.260824	0.201657	0.186791	0.269967
Lim3	0	0	0	0	0	0	0	0
amd	0.475177	0.017736	0	0	0	0.015089	0	0.0137703
CG10561	0.384265	0.0823723	0.101597	0.11981	0.107072	0.0782463	0.128248	0.111105
Ddc	0.167701	0.0113393	0.00902832	0.0204359	0	0.00616135	0	0.0197101
l(2)37Cc	1.57738	1.84662	1.59562	2.17109	1.97427	1.13465	1.16718	1.23384
l(2)37Cb	0.230623	0.131262	0.186315	0.155861	0.145733	0.0892792	0.0542067	0.103342
l(2)37Cd	0.343837	0.154198	0.100392	0.0755653	0.0638299	0.0254269	0.036836	0.051841
AsnRS	0.522681	1.28568	0.859907	1.66067	1.32785	0.875869	1.43453	0.926021
DCTN6-p27	1.33949	0.74313	0.806963	0.659243	0.758776	0.936297	1.11571	0.469376
l(2)37Cg	0.779759	0.525169	0.389154	0.739583	0.743354	0.215536	0.429729	0.410768
brat	1.65363	1.05971	1.47611	0.850644	0.913828	1.84369	2.01502	3.13723
CR44977	0	0	0	0	0.00496575	0	0	0
CG17568	0	0.121219	0.0912189	0.0962573	0.0122193	0.049144	0.156881	0.120826
CG42688	0	0	0	0	0	0	0	0
CG46059	0	0.00685127	0	0	0	0	0	0.0119462
gammaTub37C	0	0.0386994	0.0241903	0	0.00640724	0	0	0
pigeon	0.416838	0.073574	0.0974012	0.0543147	0.0629825	0.0666389	0.0183255	0.0887507
drl	0.0838504	0.111812	0.0399501	0.150483	0.194459	1.56505	0.7461	0.235217
CR44189	0	0	0	0	0	0	0	0.0110969
CR45700	0	0	0	0	0	0	0	0
CR45258	0	0	0	0	0	0	0	0
dnt	0.404409	0.174675	0.193395	0.118394	0.26508	0.850032	1.02741	0.32273
CG13086	0	0	0	0	0	0	0.00816411	0.024129
CG17349	0	0	0	0	0	0	0	0
CG17350	0.256215	0.0595062	0.019392	0.0139983	0	0	0	0
fon	0	0	0	0	0	0	0	0.00382078
CG17549	2.6142	0.337428	0.0393069	0.0318054	0	0	0.011078	0.0663089
CG17544	0.405378	0.264757	0.140504	0.183653	0.174046	0.319159	0.184483	0.311349
Pax	1.78704	0.714499	0.795633	0.348453	0.775221	0.96188	1.22646	0.669303
Lectin-galC1	0	0	0	0	0	0	0	0
lectin-37Db	0	0	0	0	0	0	0	0
CG16771	0.0867002	0.10434	0.0339004	0.0382221	0.0402476	0.157496	0.0517275	0.103675
CG13085	0	0.0394775	0.0281809	0.0245136	0.0284192	0.0137301	0	0.00827443
RtcB	0.381798	0.702819	0.479016	0.714993	0.729746	0.365778	0.461545	0.442901
Rab9	0.34082	0.393989	0.49088	0.171227	0.0620568	0.123805	0.130102	0.300787
CG10237	0.0899928	0.0742396	0.0206786	0.0588103	0.0615666	0.0598622	0.227893	0.179136
RanGAP	0.49251	0.739841	0.350742	0.700552	1.00511	0.454972	0.531334	0.523179
Hs2st	0.227971	0.182834	0.125786	0.164392	0.137546	0.0432227	0.182278	0.103539
Top2	0.640618	1.2275	0.836855	1.42514	1.65839	0.995188	1.08183	0.877021
CG10026	2.69158	0.414585	0.15762	0.0449637	0.0524554	0.191777	0.222854	0.0187031
tj	5.55044	3.07011	2.8185	1.556	1.01772	0.50119	0.602706	2.05904
CR45722	0.153445	0.146842	0.120653	0.0289477	0.0195569	0.00874263	0	0.0124452
CR43839	0	0	0	0	0.00574886	0.0144504	0	0
CG10195	0.225634	0.513692	0.403637	0.249458	0.276338	0.272767	0.339452	0.308974
CG13084	0	0	0	0	0	0	0	0
CG13083	0	0	0	0	0	0	0	0
CG10194	0.386274	0.325151	0.336327	0.174841	0.2189	0.305608	0.406125	0.224473
CG18094	0	0.0394621	0.0480196	0.0147551	0.00581063	0.0404854	0.0326142	0.0247446
CG10189	0.334429	0.107273	0.139296	0.115863	0.104933	0.176109	0.0903658	0.143069
swm	0.785067	0.6203	0.552587	0.483334	0.425219	0.382422	0.559181	0.460485
Top3alpha	0	0.228994	0.346678	0.170405	0.218312	0.180439	0.173803	0.134478
CG10188	0.237295	0.111849	0.0944445	0.0511644	0.0765601	0.0666252	0.0822795	0.0800043
Hasp	0	0	0	0	0	0	0	0
CR43363	0	0	0	0	0	0	0	0
CG10132	0	0	0	0	0	0	0	0.00885748
CG10166	0.655681	0.596763	0.475755	0.542652	0.691878	0.745538	0.461247	0.623198
CG10137	0	0.0579382	0.0425293	0.0423066	0.0558033	0.0297396	0.0490459	0.0761595
CG10165	0.167701	0.697305	0.243821	0.680297	0.448007	0.53199	0.723955	0.740613
CG33116	0.153445	0.128999	0.0951704	0.122733	0.248881	0.166277	0.0601729	0.0945944
CG13082	0	0	0	0.00722663	0	0.00348638	0	0
ref(2)P	1.99081	1.16005	1.74046	0.634548	0.568278	0.671595	0.89484	0.741904
CG10337	0.150263	0.371043	0.345266	0.283444	0.254389	0.277056	0.448738	0.196336
Tep4	0.266686	0.337489	0.333067	0.0674577	0.0679718	0.174888	2.08649	0.0485128
CG13078	0	0	0	0	0	0	0	0
CG13077	0	0.0108671	0.00515588	0	0	0	0	0
spi	1.15763	0.74201	1.14716	0.594324	0.623098	0.360291	0.243411	0.445021
msb1l	0	0.235294	0.349174	0.21892	0.477796	0.205945	0.161343	0.174326
CG10268	0.247729	0.127364	0.152187	0.141195	0.210059	0.198773	0.108297	0.0853149
Hakai	0.561344	0.308931	0.374024	0.277349	0.320173	0.222317	0.155304	0.246921
PCNA2	0.113379	0.0813309	0.0104955	0	0	0.0122186	0.0230502	0.012943
CG10366	0.659186	0.144935	0.158601	0.0503348	0.135611	0.0863592	0.0844084	0.0635667
Lar	0.221299	0.341519	0.322551	0.275381	0.356891	0.491714	0.420999	0.416747
CG10462	0.523723	0.516302	0.299067	0.186158	0.162567	0.26299	0.132728	0.171512
Nf-YB	0.78967	0.377259	0.361304	0.171854	0.218657	0.146998	0.120695	0.179773
CR44906	0	0	0	0	0.00692475	0	0	0
CG10631	0.46993	0.123582	0.0927807	0.070498	0.0530152	0.0259307	0.0976211	0.16131
CG10628	0.320813	0.330382	0.355655	0.313453	0.226157	0.262657	0.164807	0.268186
CG10463	0.0870853	0.20613	0.139269	0.252098	0.248477	0.125552	0.175641	0.284443
fbp	0.0899928	0.259522	0.0936856	0.0343302	0.0684466	0.0814317	0.0259309	0.0407413
bsh	0	0	0	0	0	0	0	0
CdGAPr	0.0867002	0.157105	0.146191	0.120151	0.0880368	0.262582	0.620664	0.169999
CG10466	0.411138	0.267425	0.243289	0.217914	0.154225	0.181731	0.249143	0.214144
fs(2)ltoPP43	0.503276	0.495926	0.300484	0.380891	0.423611	0.316252	0.31055	0.333236
sick	0.677824	0.701737	2.6451	1.19236	2.05042	2.37199	0.671558	0.732254
snRNA:U4:38AB	0	0	0	0	0	0	0	0
CR45183	0	0	0	0	0	0	0	0.00685637
COX4	7.48137	11.5411	9.24129	11.9316	8.35209	7.4761	7.19995	7.68419
CG16772	0	0.0106128	0.0173301	0	0.0200846	0.0129232	0	0.0167523
Hf	0.359971	0.600949	0.370414	0.0176951	0	0	0	0.0152822
barr	0.164264	0.157495	0.206692	0.159313	0.207166	0.178762	0.189562	0.138695
lok	0.716656	0.662827	0.911988	0.362877	0.685891	0.422374	0.358976	0.246927
vls	0.373728	0.636716	0.447445	0.618116	0.610042	0.524876	0.333657	0.505831
bwa	0.0771784	0.0644168	0.0672749	0.0218051	0.0435451	0.0479552	0.134648	0.0853328
CG10730	0	0	0	0	0	0	0	0
pr	0.620715	0.630864	0.576234	0.672625	0.669428	0.614241	0.45256	0.608368
neb	0	0.0864148	0.177106	0.0842288	0.154206	0.0572977	0.0584023	0.0547834
fok	4.87228	0.982566	1.2256	0.965687	0.819768	1.31519	2.165	1.87303
CG10747	0.72919	0.232382	0.1693	0.0593134	0.0418429	0.085258	0.201885	0.11041
CG10721	0.230821	0.258565	0.268203	0.198019	0.21821	0.254335	0.2618	0.201025
Taf13	0.53993	0.839267	0.955932	0.667226	0.665338	0.67376	0.472987	0.516649
nesd	0	0.347565	0.23367	0.242222	0.469592	0.46024	0.265056	0.225964
mRpS18B	0.315056	0.488198	0.506756	0.719092	0.548141	0.399547	0.596737	0.349263
Kua	0	0	0	0	0	0	0	0
CG13970	0	0	0	0	0	0	0	0
spir	0	0.0398557	0	0.010914	0.0181794	0.165483	0.0821888	0.342558
La	0.927259	1.73492	0.939461	2.50481	2.0828	0.710308	1.25048	1.163
RtGEF	0.452321	0.36299	0.231598	0.142346	0.129922	0.130379	0.162596	0.111983
CG16798	0	0	0	0.00533518	0.00549348	0	0	0
CG10947	0.310608	0.0960521	0	0.0210391	0	0	0	0.00608569
CG10949	0.237295	0.133489	0.0997619	0.119101	0.0864143	0.140235	0.0746713	0.116475
Arpc2	0.525394	1.21743	1.02402	1.24282	1.2436	1.04178	1.20758	0.809934
snoRNA:Psi18S-525a	0	0.0141163	0.00925396	0	0	0	0	0
snoRNA:Psi18S-640e	0	0	0	0	0	0	0	0
CG15130	0	0	0	0	0	0	0	0
CG31688	0	0.0127358	0.00262871	0	0.0121013	0.00262426	0	0
CG31687	0	0.074377	0.028327	0.0153305	0.0127051	0	0.0228969	0.0391782
CG18858	0.0771784	0	0.0422504	0.00540282	0.004499	0	0.0230502	0.00318126
Cdc23	0.24435	0.216397	0.188159	0.186526	0.157528	0.116237	0.145353	0.0412706
CG2493	0.497657	1.16694	1.50311	1.16047	1.45241	0.93966	1.15149	0.751733
CG34007	0	0	0	0	0	0	0	0
CG17470	0	0	0.0183325	0.00814667	0.0113012	0	0	0
phr6-4	0	0.0399623	0.0144719	0.00540282	0.0418649	0.0171254	0.0147328	0.00819507
CG2608	0.240145	0.205624	0.190602	0.190399	0.163503	0.170392	0.227528	0.185634
Uhg3	0.337527	0.677927	0.804408	0.63388	0.432255	0.201132	0.25606	0.436607
CG18810	0	0.007787	0.0242489	0	0.00718677	0.0105302	0	0.00795949
CG2611	0.0771784	0.289121	0.163993	0.318115	0.216486	0.33294	0.27754	0.186658
brun	0.173785	0.107899	0.112341	0.147878	0.0694215	0.124355	0.172514	0.108833
CG2614	0.0870853	0.191993	0.105478	0.151038	0.128257	0.136097	0.220181	0.0764874
CG31678	0.0838504	0.105957	0.0667904	0.138389	0.0778959	0.155222	0.0752418	0.0637351
IKKepsilon	0.562964	0.354099	0.245688	0.122229	0.158104	0.190332	0.222985	0.153897
Cen	0.153445	0.0990004	0.130984	0.0301291	0.0219418	0.0884376	0.0453939	0.0800289
CG2617	0	0.158624	0.209647	0.15081	0.150176	0.0802096	0.0475315	0.15553
Hr38	0	0.00570844	0.0310155	0.0101075	0	0	0	0.00518206
CarT	0	0	0.0393404	0.0086494	0.0133452	0	0	0.00515526
TM9SF2	2.27694	1.15207	1.60506	0.80064	0.853086	1.02664	0.970276	1.14518
Fs(2)Ket	0.466885	0.940959	0.83181	0.86227	1.16366	0.59408	0.51169	0.713436
CG9319	0.567259	0.205496	0.155491	0.120631	0.143209	0.169866	0.303006	0.156641
Ns4	0.248114	0.113153	0.159903	0.0781499	0.0929035	0.0288814	0.0823813	0.106601
CG9323	0	0.101399	0.0984241	0.0585121	0.0740088	0.104983	0.0238788	0.0609248
dia	1.12306	0.313352	0.254622	0.24622	0.149271	0.255392	0.287246	0.236639
cad	0	0.0110148	0.00475323	0.00362015	0	0	0	0.0116687
Pomp	3.17721	4.80351	3.56571	5.73408	6.95068	5.83979	5.54845	3.64769
vari	1.39082	2.69755	3.9934	0.827039	0.539433	0.302718	0.151741	0.42343
CR44146	0	0.0121643	0	0	0.00736689	0	0	0
CG9328	2.2457	2.0946	3.40646	1.01106	1.13745	0.635429	3.36194	0.352427
CheB38c	0	0.00685127	0	0	0	0	0	0
CG9331	0.23283	0.457436	0.455959	0.154869	0.0746242	0.082243	0.16881	0.0411502
CG31673	0.783582	1.07078	1.26748	0.668556	0.866303	0.630709	0.786972	0.64286
CG31674	0	0.107919	0.0539399	0.0104262	0.0434341	0.0373425	0	0.0093226
Oseg5	0.0899928	0.15318	0.238044	0.0803512	0.0881297	0.0508038	0.0677735	0.124742
CG31676	1.61903	3.44129	7.64525	1.38351	0.943882	0.111589	0.0659559	0.0622629
CG14402	0	0.00605286	0	0.00340989	0	0	0	0
twit	0	0	0.0103552	0.00722663	0	0.016467	0	0.00509406
CG9336	7.70107	0.044264	0	0.0389961	0	0.0346197	2.76518	0.0097822
CG9338	2.91994	0.0737753	0.00901085	0.0473264	0.0281616	0.0287167	0.927608	0.0160135
CG31675	0.0838504	0	0	0.00576879	0	0	0.0331837	0
CG14401	0.238207	0	0	0	0	0.00882916	0.220581	0.00885748
sky	7.79908	1.03751	0.900802	0.247201	0.351064	0.369865	0.615421	0.941382
Mtp	0	0.101144	0.0397963	0.064745	0.0438977	0.0256105	0.0238788	0.0612344
CR33318	0	0	0	0	0	0	0	0
RPA2	0.498941	1.25224	0.772712	1.1892	1.78262	0.668599	0.574488	0.493079
CG9272	0.3282	0.498813	0.416208	0.198586	0.140298	0.204281	0.159809	0.12157
CR33319	0	0	0	0	0	0	0	0
CG9270	0	0	0	0	0	0	0	0
CR44606	0	0	0	0	0	0	0	0
CG42238	4.50602	0.530407	0.588945	0.199433	0.171516	0.171199	0.299079	0.348412
Itgbn	0	0	0	0	0	0	0.0244923	0
CG9265	0	0	0	0.0413724	0	0	0	0
tadr	0	0	0	0	0	0	0	0
CG33509	0	0	0	0	0	0	0	0.0283328
ppk13	0	0	0	0	0	0	0.0349285	0.126052
CG14397	0	0.00567218	0	0	0	0	0	0
l(2)05287	0	0.283112	0.123381	0.266491	0.207901	0.0755833	0.128418	0.120059
CG34136	0	0.0184019	0	0.0120411	0	0.0195583	0	0
CR43809	0	0	0.0061872	0	0	0	0	0
CG9257	0.113379	0.200596	0.141955	0.199307	0.171106	0.074757	0.176119	0.114725
Nhe2	0.177078	0.296018	0.439263	0.249172	0.360351	0.502601	0.494929	0.431093
Dap160	0.0838504	0.19553	0.183858	0.128467	0.0978683	0.104364	0.197136	0.213566
CG9253	0.381796	0.300541	0.313262	0.778768	0.573098	0.324963	0.3608	0.496112
del	0.327288	0.536336	0.356118	0.0665743	0.0578862	0.0536534	0.191605	0.0698829
E2f2	0.576308	0.45329	0.348109	0.327588	0.408836	0.2937	0.383331	0.308569
Mpp6	0.147355	0.34462	0.335267	0.558016	0.418511	0.262384	0.346642	0.281446
CG9249	0.0838504	0.211385	0.255401	0.203565	0.104665	0.144321	0.281019	0.125476
CG9248	0.263778	0.238983	0.233918	0.15722	0.189062	0.294686	0.40217	0.437116
Nbr	0.176693	0.36593	0.38796	0.197159	0.267157	0.274524	0.307851	0.295301
CG9246	0.438248	0.308369	0.149416	0.618535	0.39484	0.130713	0.336705	0.296454
CR44910	0	0	0	0	0.0039542	0	0	0.00685637
Acon	1.06366	0.950032	1.07259	0.820074	0.849309	0.582831	0.611247	0.697848
CG31627	0	0.0104309	0	0	0	0	0	0
bur	0.694028	0.755951	0.489763	0.663595	0.493997	0.442034	0.594032	0.540465
scaRNA:PsiU2-38.40.42	0	0	0	0	0	0	0	0
CR44911	0	0	0	0.00438761	0	0	0	0
Mcm10	0	0.154278	0.135745	0.125705	0.215632	0.0655454	0.0680861	0.109153
Ret	0	0	0.0358574	0	0	0	0	0
CG31624	0	0	0	0	0	0	0	0
CG31988	0	0	0	0	0	0	0	0
clumsy	0.190557	0.0278272	0	0	0	0	0	0
Atg18b	0.722175	0.182524	0.626201	0.0602785	0.0649299	0.189831	0.443178	0.108747
snRNA:U4:39B	0	0.00993167	0.0079411	0	0.0121448	0.00262426	0.0324652	0.0156801
CG8679	0	0.0822438	0.0724009	0.0623916	0.068635	0.00267497	0.0498647	0.0525597
CG8677	0.709173	1.19973	0.96777	0.909331	0.758128	1.09592	1.20302	1.00967
CG31626	0	0	0	0	0	0	0	0
CR45713	0	0	0	0.0120798	0.00312681	0	0	0
Hr39	0.203371	0.255754	0.319249	0.0951947	0.0649261	0.154135	0.0834494	0.114706
l(2)k14505	0.657774	0.61391	0.718126	0.464522	0.630109	0.348489	0.605017	0.440894
CG8671	1.1502	0.880176	1.18036	0.59584	0.512148	0.505661	1.14488	0.822337
Cyp6t2Psi	0.0899928	0.045929	0.0791323	0.0227103	0.00816958	0.00586525	0	0
Mondo	0.233919	0.428418	0.309742	0.418034	0.259858	0.379495	0.520576	0.218329
Gr39a	0	0	0	0	0	0	0	0
crc	0.318477	0.624893	0.743045	0.38658	0.257367	0.446566	0.58052	0.515475
Tsp39D	0.559889	0.643912	0.419964	0.301041	0.395926	0.400603	0.391345	0.583966
dtr	0	0	0	0	0	0	0.0232283	0.00902489
nrv3	0	0.0186549	0	0	0	0	0.0571488	0.0119462
His-Psi:CR31754	0	0	0	0	0	0	0	0
His1:CG33801	0	0.0274707	0	0.0272503	0	0	0	0
His2B:CG17949	0	0	0	0.0092959	0	0.0194429	0	0.0155898
His-Psi:CR33805	0	0	0.0046905	0	0	0	0	0
His1:CG33807	0	0	0	0	0.00149932	0	0	0
His1:CG33834	0	0	0	0	0	0	0	0
His2B:CG33868	0	0.0587162	0.0669481	0.0665001	0.0342607	0.072821	0.0604758	0.0440957
His-Psi:CR31614	0	0.00492747	0	0	0.00253826	0	0	0
Lamp1	4.56748	2.38772	4.10073	1.66657	1.57252	2.25112	3.26792	2.55778
nompB	0	0	0	0	0	0.0152148	0	0.0151192
CG2201	0.762241	0.206145	0.165856	0.00373274	0.0322307	0.0640312	0.440248	0.12927
CR43148	0.255162	0.0285678	0	0	0.00506571	0.0086356	0	0.0593942
Df31	14.1297	38.9745	25.8143	31.9979	40.4463	34.3597	25.7939	31.9224
CR44993	0	0	0	0	0	0	0	0
Ac3	0	0	0.00969602	0	0	0	0	0
CR43144	0	0.131095	0.164681	0.118847	0.168037	0.175512	0.190185	0.364751
Cul2	0.941666	0.300311	0.268848	0.216306	0.237251	0.157876	0.305894	0.175995
CG2225	0.173843	0.134725	0.139607	0.0459803	0.0309092	0.0708241	0.0609483	0.0875185
eEF2	8.79321	9.6521	9.36052	12.6703	11.4638	14.073	12.3537	11.9206
nolo	0	0	0.00867774	0	0	0	0.0103104	0
step	0.454923	0.344736	0.232849	0.101778	0.170202	0.26566	0.656298	0.208165
CG1416	1.40226	1.77413	1.43193	1.80296	1.7744	1.01649	1.29018	1.33517
CG31612	0	0.00606808	0.0261627	0.0124973	0.00751695	0	0.0141796	0.0212955
CG11630	0	0.0071825	0	0	0	0	0	0
tsh	5.9998	1.32754	1.31422	0.659006	0.980899	0.6114	0.250371	0.226921
CR44917	0.230623	0.0343297	0.0079411	0	0.00696161	0	0	0
CR44919	0	0.00836635	0.0062277	0	0.00736689	0	0	0
CR44920	0.225634	0	0	0	0.00517133	0	0	0
CR45334	0	0	0.00731066	0	0	0	0	0
tio	0.642676	0.103149	0.08207	0.0275045	0.0039542	0	0	0.0111395
CR33987	0.0771784	0.0111093	0.0141389	0.00648731	0.00660845	0	0	0
CG31601	0	0	0	0	0	0	0	0
CG15219	0	0	0	0	0	0	0	0
CG10834	0	0	0	0	0	0	0	0
CG6675	0	0	0	0	0	0	0	0
CG3651	0.890962	0.502727	0.343595	0.268783	0.361098	0.300032	0.316569	0.313621
CycK	0.55198	0.751915	0.554668	0.577598	0.510258	0.364693	0.62547	0.53376
CR43241	0.950391	0.543291	0.805316	0.291473	0.238488	0.37947	0.404508	0.400792
CG42748	2.06709	1.15537	1.31104	0.47103	0.615453	0.865157	0.996766	0.880842
dunk	0.141784	0.0121643	0.00262871	0.00722663	0	0	0	0
Clamp	0.781791	0.608146	0.700274	0.417133	0.298747	0.42212	0.603238	0.451679
CR44809	0	0.0109241	0.00901085	0.0209732	0.0183708	0.00770686	0	0.00541621
CG3635	0	0	0	0	0	0	0.0326564	0
Ir40a	0	0	0	0	0	0	0	0
CR12628	0	0	0	0	0	0	0	0
CR43765	0	0	0	0	0	0	0	0
CG3262	1.99713	1.51991	1.40648	1.12266	1.08185	1.15124	1.12903	1.14028
RpL21	24.6204	44.2437	37.2731	62.825	64.9117	66.4507	54.6819	62.628
Tif-IA	0.510438	0.616179	0.361927	0.714235	0.498577	0.345461	0.550919	0.551163
CG17018	0	0.0524875	0	0.00568437	0.00126913	0	0	0
RpL5	11.3488	11.3184	14.2664	13.7053	16.1612	18.8209	11.8224	21.1069
snoRNA:Psi28S-2996	0	0	0	0	0	0	0	0
CG17490	0	0	0	0	0.00321168	0	0	0
CR46268	0.290457	0.230895	0.219468	0.142539	0.125766	0.10383	0.125602	0.129573
CG17493	1.08199	1.30808	1.09111	0.854284	0.931955	1.05751	1.0751	1.37412
Slmap	0.727486	0.684969	0.490042	0.517285	0.535346	0.417931	0.359022	0.702092
CG40006	0	0.0146362	0.0291241	0.00373274	0.00632031	0	0.0297164	0
CG40439	0	0	0.0210371	0.0145393	0.0205786	0.0295274	0.0147328	0.0242122
CG17715	1.19981	0.450228	0.661955	0.305848	0.405925	0.326703	0.211759	0.310211
lt	0.319915	0.206153	0.262906	0.184612	0.226948	0.269077	0.290911	0.207445
cta	0.530465	0.421383	0.483288	0.239788	0.191116	0.291235	0.423329	0.2849
Cht10	0	0.0124875	0.0154179	0	0.00182229	0	0	0
Spf45	0.58007	0.521366	0.710485	0.320089	0.370372	0.441634	0.494248	0.355949
CR43242	0.296282	0.233789	0.255185	0.0924945	0.124743	0.129622	0.141579	0.147927
CG12567	0.468883	0.324344	0.295609	0.213833	0.231147	0.267241	0.266168	0.320526
CR44268	0	0.0301042	0.0439886	0.0177178	0.0050858	0.0105302	0.0497931	0.0170509
CR46253	0	0.0202431	0.0164659	0	0.00552753	0.0152707	0	0.00382078
Gpb5	0	0	0	0.00814983	0.00811504	0	0	0.00197267
Tim23	2.34661	2.34746	1.67981	2.12455	1.95801	1.44827	2.17162	1.4845
CG45781	0	0	0	0.00753009	0	0	0	0
CG40498	0	0.0314733	0	0	0.00659984	0	0	0
CR41257	0	0	0	0	0	0.00267497	0	0.00387208
rl	2.35892	1.38268	1.53308	0.656134	0.626265	0.746049	1.02202	0.862869
CR40190	0.164264	0.187995	0.419853	0.114313	0.0799341	0.125942	0.108551	0.160375
CG40191	1.03316	0.700643	0.604139	0.524418	0.601815	0.45106	0.514551	0.541368
Yeti	3.88891	3.36343	3.42468	2.73579	2.82287	2.70892	3.12205	2.59123
CR44042	0.0870853	0.253681	0.493212	0.346404	0.263713	0.247469	0.306961	0.201829
l(2)41Ab	0.0838504	0.0220769	0.0320643	0.0406818	0.0469861	0.0724282	0.0204103	0.0795965
CR44043	0	0.0163566	0.0424816	0.0151221	0.0026587	0	0	0.00373388
Maf1	1.30855	0.954765	1.29607	0.853936	1.02787	0.976281	1.21004	0.740261
CG17691	1.90849	2.57062	3.61387	1.88665	1.81718	1.33753	1.40302	1.7327
CG41520	0.0899928	1.27921	0.973595	0.108323	0.0225067	0.0249539	0.00816411	0.00885748
CG17684	0	0.00741268	0	0	0.00544462	0.00586525	0	0.00698086
MFS17	0.820979	0.655582	0.961922	0.452128	0.35976	0.410827	0.496622	0.570057
CG41378	0.227441	0.101502	0.324223	0.253659	0.234034	0.243873	0.350684	0.374752
Scp1	0	0.0376242	0.0103082	0	0	0	0	0.00339335
dpr21	0	0	0	0	0	0	0	0
CR41243	0	0	0	0	0	0	0	0
CR41501	0	0	0	0	0	0	0	0
CR40461	0	0	0	0.00722663	0	0	0	0
RYa	0	0.0104722	0	0	0	0	0	0
uex	1.67212	2.00216	1.96529	1.55808	1.37205	1.41532	1.60463	2.01057
CR45139	0	0.00641743	0	0.00648731	0.00924193	0.00530696	0	0.00693564
Haspin	0.705793	0.665726	0.889365	0.40239	0.59351	0.599107	0.481849	0.514495
CG17683	0.20724	0.867655	0.837762	0.686629	0.656175	0.795729	0.668298	0.701661
RNASEK	7.14117	8.63487	11.0113	9.24205	9.50294	7.96608	6.15374	6.47115
IntS3	0.1734	0.344894	0.356756	0.423497	0.290345	0.280766	0.44177	0.314288
Gprk1	1.932	1.95487	2.21201	1.03439	1.35085	1.34554	1.46483	1.67828
RpL38	23.8804	36.0647	39.7629	40.2572	41.8184	44.4147	32.4617	45.8579
Stlk	0.430537	0.455852	0.45695	0.341522	0.309961	0.359008	0.466366	0.445473
p120ctn	2.21251	1.33267	1.30026	0.886259	1.02754	1.25471	1.50183	1.10681
CG17486	0.430564	0.67036	0.717887	0.339594	0.360352	0.386861	0.316649	0.415028
CR45923	0	0	0.00334476	0.0702362	0.0247525	0.0168177	0	0.0249802
CG17883	1.02129	1.00266	1.16028	0.535426	0.502655	0.680114	0.67775	0.661065
Nipped-B	5.56681	3.50181	3.18415	2.09233	2.01628	2.77847	2.81313	2.45137
CR45471	0	0.00592002	0	0	0	0	0.0215525	0
CR41440	0	0.0191116	0.0170232	0	0.0115519	0.0135536	0	0.00945491
conu	1.19721	0.551995	0.630847	0.276894	0.232507	0.337134	0.470377	0.318166
CR43281	0.142837	0.00487155	0.0221825	0.0131101	0.00678803	0	0.013528	0.00394546
CR46064	0.0867002	0.24352	0.301251	0.280853	0.256864	0.345981	0.468275	0.334149
CG12547	0.63594	0.401022	0.290989	0.298832	0.227016	0.354261	0.350531	0.311178
CG17528	0.306715	0.476664	0.364487	0.275966	0.336751	0.286468	0.309882	0.355172
CG14464	1.81051	1.38654	1.04517	0.387252	0.383425	0.306426	0.403635	0.42273
CG44102	0	0.0141163	0.107022	0.0119615	0	0	0	0.00322642
Ir41a	0	0	0	0	0	0	0	0
CR44105	0	0	0	0	0	0	0	0
TpnC41C	0	0.00685127	0	0	0	0	0	0.00197267
CG3107	0.393929	0.236616	0.216939	0.181576	0.138524	0.115449	0.104582	0.11868
gus	2.29715	1.46478	1.32016	0.91416	0.863759	1.18791	1.24025	1.0166
CR43256	0	0.0768353	0.0774285	0.0460265	0.0960004	0.0479432	0.0636657	0.0415694
Atf6	1.03589	0.927113	0.817837	0.660796	0.59485	0.738628	1.29862	0.747104
Nipped-A	0.431342	0.680239	0.668428	0.683109	0.7264	0.734399	0.839064	0.815124
d4	0.732391	0.86101	0.881351	0.514141	0.505656	0.632308	0.383702	0.464974
sxc	0.659682	0.570294	0.765469	0.64773	0.586791	0.65556	0.769397	0.412198
CG10465	0.998031	0.887813	0.650556	0.488731	0.537389	0.484531	0.548651	0.60774
CG10395	0.906026	0.767064	0.571289	0.510712	0.475471	0.498154	0.59363	0.449753
CG30441	0	0.0504582	0.0415823	0.0120411	0	0	0.0250401	0.0102212
COX4L	0	0.143143	0.163735	0.09924	0.274799	0.196353	0.0300528	0.0414152
CG10417	0.77579	0.788548	0.856904	0.696776	0.709919	0.841348	0.653561	0.657887
CR42646	0	0	0	0	0	0	0	0
laccase2	0.226687	0.13858	0.133474	0.0168622	0.0199182	0.00895445	0.0683789	0.0278888
CG30440	0	0.121063	0.0535285	0.0133291	0.00301126	0.00364063	0	0.0281975
CG30438	0	0.0152501	0	0	0	0	0	0
TpnC4	0.153445	0.209881	0.0216111	0.0174643	0	0	0	0
Fis1	3.99994	2.90319	3.25716	2.19226	2.19333	2.13839	2.46121	2.13585
CG17508	3.09427	1.59164	1.99815	0.806061	0.617369	0.634745	1.27686	0.555462
CG11665	0.55145	0.52003	0.476866	0.518426	0.487065	0.485273	0.80788	0.568188
CG1344	1.43549	0.461135	0.510177	0.466478	0.324959	0.37924	0.605167	0.30104
Not3	1.21175	1.00492	0.98882	0.720126	1.02441	0.792039	0.896091	0.83666
CR45472	0.141784	0.0160375	0.0297046	0.0179796	0	0.0141193	0.0637552	0.129933
CG8245	0	0	0.0161861	0	0	0	0	0
kune	0.487787	0.372167	0.376169	0.174496	0.20096	0.187251	0.283172	0.735992
scaf	0.0771784	0.0733231	0.121406	0.0260014	0.0288775	0.0418536	0.0415877	0.199182
CG17337	1.02229	0.636243	0.459634	0.252729	0.309259	0.197916	0.267855	0.206167
vlc	0.816802	0.572868	0.570181	0.312355	0.323244	0.341214	0.352505	0.329132
ap	0	0	0.0236289	0.0175024	0.0132547	0.00263199	0	0
l(2)09851	0.317708	0.425187	0.157014	0.742098	0.587194	0.302953	0.346612	0.332484
CG34200	0.636052	1.03112	1.08457	1.12652	1.02804	0.667006	0.855323	0.982101
CG7791	0.287222	0.357816	0.262786	0.228426	0.25883	0.211461	0.214007	0.195258
Gp210	0.484708	0.446182	0.279916	0.691728	0.561068	0.324554	0.35682	0.522073
ZnT41F	0.0838504	0.17156	0.198344	0.0171801	0.023902	0.00525625	0.0477066	0.0545434
CR44125	0.796972	0.0795766	0.116478	0.0225582	0.00428545	0.0152136	0	0
CG43366	1.74444	0	0.00833527	0	0	0	0	0
CG7881	0	0.011089	0	0	0	0	0	0.0030354
CR44127	0.142837	0.0752824	0.155121	0.0379586	0	0	0	0
[truncated: 10,730 more rows]

## Sheet: FC
	St2-4 I	St2-4 II	PT St4-5	MB St5-6	MB St6	AT St5-6	PT St6	MB St7	MB St8	MB St8-9	MB St9	AT St7	AT St8-9	PT St7	PT St8 I	PT St8 II	PT St9
l(2)gl	0.39949	0.4031	0.351989	0.378295	0.30722	0.376166	0.257505	0.363921	0.273867	0.256467	0.239094	0.347537	0.357533	0.257496	0.124831	0.232965	0.240218
CR43609	0.000367152	0	0	0.00146902	0	0.00217058	0	0.00183733	0.00338966	0.000917803	0	0	0.00213246	0	0	0	0
Cda5	0.000715192	0.0017313	0.00416699	0.000881214	0	0	0	0.00366786	0.00377514	0.00275171	0.00318465	0.0034356	0.0121308	0	0	0.00390919	0.00957524
CR46254	0.000510656	0.00141294	0	0	0	0	0	0.0011248	0	0.00011483	0.000404177	0	0	0	0	0.00209746	0
dbr	0.201653	0.172116	0.181126	0.160817	0.125895	0.182348	0.106122	0.15252	0.144212	0.128815	0.124702	0.192927	0.160133	0.147477	0.0965733	0.134352	0.088305
CR44987	0.00531537	0.00573708	0.00964096	0.00343041	0.00686821	0.00587965	0	0.00462373	0.00471507	0.00338888	0.00460843	0.00260117	0.00486125	0.00362118	0.00560273	0.00257758	0.0160372
galectin	0.645631	0.683896	0.474255	0.564418	0.651207	0.540187	0.736413	0.522049	0.429287	0.477367	0.478903	0.470154	0.538752	0.590264	0.677789	0.514309	0.388222
CG11374	0.00319015	0.00359932	0.00139136	0.00356724	0.0032048	0.00283324	0	0.00160868	0.000928333	0.00166781	0.00099258	0.00136213	0.000218746	0.00153289	0	0.00437774	0
net	0	0.000364214	0	0.000185053	0	0.00264032	0	0.000308765	0	0.000562539	0.00044936	0	0.000998357	0	0	0	0.00702768
Zir	0.154026	0.145895	0.118746	0.139381	0.0869456	0.132205	0.0825254	0.0996832	0.111588	0.0880346	0.0988894	0.134281	0.144506	0.132619	0.0999937	0.119917	0.170979
CG11377	0.235915	0.269466	0.255151	0.23512	0.293154	0.232797	0.308787	0.25224	0.255048	0.2605	0.269019	0.225689	0.415482	0.277757	0.277868	0.273501	0.538643
Nhe1	0.0393765	0.0416799	0.0365916	0.0460506	0.082966	0.0520739	0.0286839	0.0502335	0.0523187	0.0391453	0.0427449	0.0465242	0.0528144	0.0231533	0.0505493	0.0398622	0.116416
Sam-S	5.47071	6.03954	6.14483	6.31744	7.22137	6.72897	6.44389	7.26493	7.00084	5.84045	7.81332	8.01107	13.022	6.6305	6.20661	6.33755	3.77096
ND-15	3.21507	3.25931	3.27617	3.2192	3.0683	3.17394	3.2416	3.3557	3.34647	3.31588	3.45885	3.29832	3.58802	3.3171	3.30549	3.18592	3.58334
CG13694	0	0	0	0.00039121	0	0	0	0.000148385	0.000695478	0.000721439	0	0	0	0	0	0	0
CG4822	0.00598549	0.00542008	0.000396232	0.00246367	0.012064	0.00540082	0.00256763	0.00215742	0	0.000385473	0.000455383	0	0	0	0	0.000900201	0
CG3164	0.159582	0.137858	0.11863	0.1461	0.116314	0.112087	0.180278	0.112295	0.135248	0.145419	0.181476	0.145928	0.256657	0.177103	0.198065	0.179715	0.365437
CR44969	0	0.00104863	0	0.000286549	0	0.00117048	0	0.000722432	0.000732261	9.70468e-05	0	0	0.00155983	0	0	0	0
Gs1	0.0117352	0.011874	0.00665338	0.0134431	0.00941093	0.00245954	0.0125466	0.00862783	0.00652618	0.00522298	0.00663341	0.0136754	0.0128707	0.00517053	0.00875233	0.00308617	0
CR44186	0	0.000415991	0	0	0	0	0	0.000565506	0	0	0.00108476	0	0	0	0	0	0
CG31974	0.0282849	0.0614717	0.0766842	0.0469533	0.0625133	0.0693369	0.0937959	0.028069	0.00552041	0.000512051	0.00118466	0.0259155	0.0135504	0.0184385	0	0.00222747	0
CG11454	0.298976	0.365496	0.266285	0.343295	0.475831	0.319954	0.439489	0.293636	0.249517	0.239894	0.274012	0.236003	0.274358	0.316782	0.382003	0.269445	0.360403
CG42399	0.026238	0.0167929	0.028951	0.0288027	0.0123107	0.0314252	0.00755021	0.0326959	0.0271314	0.0187764	0.0184907	0.0544155	0.0172242	0.0456415	0.043286	0.020505	0
CG3709	0.0597457	0.0832847	0.0811338	0.0798816	0.105814	0.0867945	0.179755	0.0837279	0.0737485	0.0731265	0.0989733	0.0753329	0.0702732	0.126674	0.157618	0.0829129	0.092258
CG3436	0.651747	0.67192	0.626937	0.76707	0.793017	0.772172	0.804623	0.657584	0.653347	0.671132	0.621547	0.735093	0.719715	0.809273	0.777263	0.654879	0.561454
CG33635	0.197308	0.173694	0.1923	0.181713	0.137542	0.218463	0.194057	0.192992	0.177995	0.20704	0.20062	0.217584	0.194496	0.226686	0.216618	0.200623	0.125677
spen	3.4945	3.13392	3.23961	3.0734	2.44364	3.00086	1.81344	2.83325	1.99108	1.85031	1.60771	2.86902	2.17589	2.19213	1.00874	2.11243	1.37046
mRpL10	0.449253	0.567811	0.509064	0.612726	0.745897	0.49783	0.745439	0.628791	0.67728	0.756444	0.775444	0.613017	0.673178	0.816941	0.986432	0.661148	0.624513
CG11617	0.000154922	0.00142313	0.00135946	0.00258727	0.00709094	0.00986017	0.00395475	0.00563432	0.00736912	0.00310953	0.0065325	0.00532635	0.00252271	0.00823024	0	0.00270169	0
Tbc1d15-17	0.202168	0.193798	0.194257	0.174193	0.181297	0.19064	0.132547	0.158239	0.15595	0.171362	0.168291	0.145429	0.191817	0.16313	0.129309	0.15875	0.194413
kis	2.20143	2.02188	1.81855	1.91027	1.40986	1.84458	1.00032	1.58434	1.15257	1.12649	0.989665	1.4237	1.31406	1.04042	0.454298	1.24947	0.731686
CR44222	0	0	0	0.000503332	0	0.00363007	0	0	0	0	0	0.00311335	0	0	0	0	0
CR44221	0	0	0	0.00094988	0	0	0	0.000879738	0	0.000170546	0	0	0	0	0	0.0011968	0
CR44218	0.00470958	0.00360048	0.00540735	0.00362824	0.00834564	0	0.00461301	0.00318932	0.00433278	0.00131285	0	0	0.00213165	0.00351919	0	0.00197825	0
Rpp30	0.251241	0.308657	0.23907	0.28673	0.329288	0.291045	0.400858	0.277927	0.24201	0.259875	0.308683	0.301706	0.213336	0.322814	0.419799	0.264792	0.13648
CG3645	0.0927659	0.127971	0.0877476	0.102204	0.116961	0.107083	0.135379	0.115152	0.144748	0.135486	0.139963	0.0995347	0.123264	0.0975126	0.198095	0.097388	0.152683
CG17075	0.00892791	0.00718675	0.00556099	0.00450963	0	0.0119049	0	0.00441434	0.00555234	0.00562546	0.00597515	0.00476772	0.00654424	0.00230387	0	0.00899061	0
CG3345	0	0.00025652	0	0	0	0	0	0.000316448	0	0	0	0	0	0	0	0	0
mbm	0.635741	0.703225	0.738496	0.82973	0.886555	0.868338	0.897184	0.837103	1.076	1.06967	1.07318	0.691373	0.755698	0.895872	1.55902	1.07447	0.707167
CG11555	0.922474	1.08999	1.08005	1.14098	1.28086	1.16784	1.34796	1.29171	1.41811	1.39903	1.41247	1.21113	1.20437	1.37321	1.71414	1.3839	0.724725
CG17078	0.18248	0.174175	0.174053	0.16724	0.134831	0.199973	0.230544	0.12585	0.129	0.11641	0.100783	0.164223	0.181803	0.120495	0.155539	0.115212	0.253969
smo	0.0766356	0.070617	0.0383135	0.0595491	0.0545533	0.0842838	0.0370514	0.0539162	0.0362611	0.0447251	0.0372704	0.0421298	0.0419693	0.0450107	0.0462334	0.0409313	0.0366647
CG11601	0.156777	0.124817	0.172547	0.134595	0.133995	0.124038	0.14686	0.167677	0.195911	0.157606	0.186898	0.152287	0.155887	0.187848	0.228441	0.146272	0.187785
CG3625	0.166796	0.156497	0.201845	0.135054	0.127188	0.188828	0.183141	0.16135	0.138373	0.0890562	0.0678836	0.134546	0.0978378	0.178443	0.103838	0.132174	0.0972579
CR46262	0	0	0.00050137	0	0	0	0	0	0.000705792	0	0	0.00487549	0	0	0	0	0
CR46263	0	0.000938711	0	0	0	0	0	0	0	0	0	0	0.000628662	0	0	0	0
Amnionless	0.00089279	0	0	0	0	0	0	0	0	0	0	0	0	0	0	0	0
CG11562	0.81304	0.847601	0.954385	0.771328	0.81386	0.868765	0.982178	0.833053	0.897767	0.810621	0.771331	0.988475	0.92259	0.85649	0.846335	0.772292	0.648287
U2af38	0.655603	0.619094	0.5644	0.635764	0.577944	0.679198	0.8057	0.461545	0.430665	0.460446	0.393019	0.443748	0.45617	0.588013	0.65182	0.448426	0.333684
Hop	1.07784	1.13438	0.932848	1.10888	1.07605	1.1829	0.982685	1.02515	0.997366	1.03748	0.981057	1.20409	1.1338	0.833879	0.960705	0.825113	0.913048
Pi3K21B	0.338116	0.384937	0.258963	0.378017	0.450027	0.324494	0.283183	0.28609	0.246881	0.258904	0.233063	0.341737	0.260382	0.27479	0.159519	0.372846	0.135859
Plc21C	0.11014	0.139036	0.0965678	0.110727	0.0983245	0.130748	0.067603	0.0783148	0.0581846	0.0430743	0.044894	0.0774296	0.0540767	0.0842811	0.0256599	0.0441729	0.0378493
CG31921	0.00156123	0.00103684	0.00324061	0.00115635	0	0	0	0.000498156	0.000938963	0.000628204	0.000549084	0	0	0	0	0.00163088	0
Ent1	0.125106	0.151883	0.127664	0.124189	0.145364	0.101754	0.170591	0.14683	0.12812	0.11414	0.129006	0.13828	0.130721	0.12072	0.0614375	0.104349	0.117068
CR45367	0.00190053	0	0	0.00060356	0.00306928	0	0	0	0.000654892	0	0	0	0.000383862	0	0	0.000929252	0
CR45366	0.000586346	0.000441314	0	0.00033404	0	0	0	0.000451416	0	0.000366798	0.00065756	0.00316739	0.000659241	0.0049303	0	0.00124551	0
CG4213	0	0.000738996	0.0014712	0.000340865	0	0.00503888	0	0.000315527	0	0	0.00162551	0	0.000726096	0	0	0	0
RpI135	0.185629	0.240505	0.206019	0.280158	0.29771	0.294265	0.316403	0.303883	0.291457	0.360207	0.366835	0.318285	0.246708	0.32804	0.48528	0.363183	0.204992
AP-2alpha	0.404867	0.43927	0.370414	0.349176	0.316985	0.440844	0.32195	0.285112	0.319819	0.264878	0.279668	0.337125	0.443436	0.263508	0.21707	0.29602	0.433701
ebi	0.15967	0.146095	0.168733	0.137605	0.12914	0.194912	0.17697	0.104037	0.17537	0.141792	0.145743	0.117104	0.123107	0.123926	0.123383	0.125765	0.175431
CG13690	0.113564	0.273987	0.382508	0.0707579	0.1823	0.121445	0.239635	0.0442684	0.25172	0.0791968	0.124205	0.0605861	0.131916	0.0469379	0.164638	0.107584	0.0129351
RpLP1	121.433	118.687	120.927	126.809	126.621	124.457	120.495	133.417	132.435	131.148	132.914	129.487	127.603	133.098	129.182	135.737	107.739
CG11885	0.410884	0.422672	0.56707	0.596097	0.638191	0.659356	0.857038	0.845046	1.05786	1.01791	0.95391	0.865927	0.776729	0.954638	1.41006	0.839555	0.561607
CG13692	0.00618756	0.00709539	0.0102723	0.0114471	0	0.0137769	0.0255039	0.014708	0.0149026	0.0110824	0.00624898	0.0134504	0.00497224	0.00656684	0.0201131	0.0104754	0
BBS8	0.00213505	0.000577701	0.00260707	0.00375595	0.00608374	0.00623313	0.00250324	0.00429722	0.000190096	0.00166171	0.000841946	0.00574794	0.00131458	0.0060409	0	0.00102502	0
ex	0.362418	0.425615	0.375395	0.375509	0.313236	0.364552	0.229948	0.36836	0.311866	0.305279	0.237757	0.358351	0.310412	0.244188	0.169837	0.170987	0.150898
CR43717	0.00179311	0.00325838	0.00138004	0.00323408	0	0	0.00432188	0.00213801	0.00234471	0.000682957	0.00110461	0.00454091	0.00187925	0	0	0.00028019	0
crq	0.133745	0.159479	0.104264	0.101831	0.115108	0.127683	0.120631	0.0859465	0.0865173	0.079489	0.117427	0.116141	0.149207	0.104442	0.0786077	0.0992352	0.170233
shv	0.0393822	0.0446809	0.0326215	0.0455228	0.0410325	0.0482299	0.0284583	0.0504812	0.0539047	0.0598473	0.0602576	0.0423189	0.0688196	0.0484472	0.0287715	0.0599262	0.0551318
CG4133	0.00133689	0.000965421	0	0.000906382	0	0.00240257	0	0.00239059	0	0.000374311	0	0.00461358	0	0	0	0.00099697	0
CG4297	0.00828246	0.010646	0.0224634	0.0202447	0.042257	0.0144465	0.00996349	0.067836	0.0688954	0.0578051	0.0581562	0.0299993	0.0704706	0.030527	0.0327752	0.0677248	0.113485
MED15	0.130375	0.1372	0.114844	0.145187	0.119608	0.139683	0.147434	0.104211	0.105447	0.101031	0.107568	0.102449	0.127768	0.110128	0.123662	0.139766	0.0813361
ush	0.152966	0.125591	0.150568	0.12758	0.0682959	0.138584	0.0841039	0.0857606	0.0508747	0.0349828	0.0301658	0.115849	0.0601687	0.10043	0.0107969	0.0601391	0
cbt	0.10017	0.104605	0.0949654	0.109843	0.103634	0.122645	0.107951	0.0924153	0.0742399	0.0771232	0.0679521	0.159307	0.122473	0.0694789	0.0563016	0.0982618	0.154824
CR46258	0.00294846	0.00551561	0.00608203	0.00402218	0.00109869	0.00274512	0.00411838	0.00358499	0.00335065	0.00148279	0.00148392	0	0.00452534	0.00278578	0.00428615	0.00222073	0
lwr	4.22486	4.14168	4.69353	3.94039	4.14235	3.84336	4.4662	3.29737	3.5713	3.58423	2.83672	3.28963	3.50732	3.77489	3.70101	3.49586	2.39068
Spp	1.36827	1.52829	1.43873	1.4191	1.49468	1.4684	1.59337	1.27854	1.20577	1.17982	1.2807	1.21192	1.14546	1.58832	1.39135	1.6414	5.13774
Ets21C	0.0104321	0.0086491	0.00793339	0.00781832	0	0.0134075	0	0.0117488	0.00689251	0.00611463	0.00904732	0.00424798	0.0124663	0.00811176	0	0.0247706	0
nAChRbeta3	0.005787	0.0103473	0.00807504	0.00606562	0.00948493	0.00252915	0.00499777	0.00108598	0.000480657	0	0.00041511	0	0.000855483	0	0	0	0
rempA	0.0101955	0.00811985	0.00648458	0.00483386	0.0100867	0.00668952	0.00516194	0.00833835	0.00672356	0.0067068	0.00515586	0.00239487	0.00203935	0.00976503	0.00352746	0.00799165	0.035009
Tspo	0.920945	1.12031	1.01251	0.879606	0.890894	0.892271	0.822634	0.925773	0.931906	0.935984	1.00493	0.89787	0.990622	0.863476	0.756821	0.984461	0.953957
CG11835	0.00196257	0.000722883	0.00255815	0.00220326	0	0	0	0.00152054	0.000763954	0.00104285	0.00112903	0.0021765	0.00147788	0.00318936	0	0	0
CG2794	0.343857	0.346098	0.330628	0.381867	0.31446	0.30868	0.387011	0.36418	0.422698	0.439582	0.400056	0.322983	0.307573	0.352703	0.550442	0.378252	0.246281
Nle	0.590977	0.514104	0.719778	0.595749	0.612596	0.69314	0.693764	0.661374	0.747967	0.754091	0.702838	0.709118	0.608718	0.720877	0.933491	0.655557	0.313173
Sf3b1	0.248701	0.220353	0.204911	0.21722	0.142045	0.209569	0.195136	0.165391	0.161165	0.19939	0.185631	0.152382	0.1732	0.183609	0.191531	0.181972	0.18515
Ipk2	0.285698	0.334585	0.329418	0.207572	0.235751	0.207728	0.300191	0.160136	0.353299	0.17902	0.227319	0.142376	0.266697	0.183958	0.150324	0.201168	0.272036
cold	0.112429	0.0937057	0.0924368	0.0897313	0.0558009	0.0548088	0.0826337	0.0672749	0.0733627	0.0639451	0.0526087	0.0661064	0.0934941	0.0776305	0.0895675	0.0687819	0.0305818
Ptth	0	0	0	0	0	0	0	0	0.000839513	0.000701414	0.00341706	0.00194804	0.00289173	0	0	0	0
Pph13	0.00100059	0.000879466	0.000935009	0	0	0.00261167	0	0.00199214	0.000451125	0.000712993	0	0.00229399	0	0	0	0.000588364	0
Gsc	0.000717059	0.000236662	0	0	0	0	0	0.0002233	0	0	0.000654556	0	0	0.00379351	0	0	0
CR46148	0	0.00155131	0.0017509	0.000991622	0	0	0	0.000987789	0.000726571	0.000170407	0	0	0.000833679	0.00273771	0	0	0
CG13689	0.217576	0.244711	0.164618	0.192461	0.223094	0.19851	0.268805	0.148021	0.119291	0.106576	0.115803	0.157031	0.134651	0.178145	0.0587845	0.149572	0.123767
CR44798	0	0	0	0	0	0	0	0	0	0	0	0	0	0	0	0	0
CG2839	0.00111084	0.0016996	0.00392572	0.00172342	0	0	0	0.00216161	0.00126432	0.00266076	0.00249226	0.00128629	0.00209622	0.00297422	0.0023942	0.00140727	0
ds	0.0224988	0.0271995	0.0421949	0.0355148	0.0132769	0.0270943	0.0224394	0.0344909	0.0201454	0.0110346	0.00582856	0.017793	0.0049769	0.0274202	0.00914899	0.0146293	0.0495285
CR46260	0	0	0	0	0	0	0	0	0	0	0	0	0	0	0	0	0
Eaat2	0	0	0	0.000521535	0	0	0	0	0	0	0	0	0	0	0	0	0
GABA-B-R3	0.000114727	0	0	0	0	0	0	0	0	0.000134639	0	0	0	0	0	0	0
CG13947	0	0	0	0	0	0	0	0	0	0	0	0	0	0	0	0	0
Pkg21D	0	0.000351027	0	0	0	0	0	0	0	0	0	0	0	0.00351919	0	0	0
Nnf1b	0.0487203	0.0938935	0.0529104	0.0329693	0.0354111	0.038992	0.0338914	0.0309688	0.0303818	0.0239972	0.0204705	0.0296836	0.0248975	0.0406578	0.0223713	0.0191669	0
Dbp21E2	0.187495	0.218884	0.205208	0.215375	0.171522	0.210357	0.250742	0.292186	0.31073	0.267789	0.287973	0.252204	0.220867	0.32147	0.354254	0.268479	0.228645
Saf6	0.102156	0.0910015	0.0960324	0.0741768	0.0424047	0.090067	0.129789	0.0642083	0.0400547	0.0461214	0.0485672	0.059286	0.0609421	0.080583	0.0466574	0.0425644	0.0648042
Pex12	0.0948398	0.117096	0.0930946	0.0950957	0.148935	0.0916471	0.148316	0.0683191	0.0951636	0.094349	0.108585	0.0742855	0.0829243	0.0987358	0.140972	0.089356	0.111572
PGAP2	0.0707149	0.0694828	0.053034	0.0478101	0.0162197	0.0659685	0.0472871	0.0522558	0.0545821	0.0471414	0.0564485	0.0423413	0.0621357	0.0590433	0.0469679	0.0434875	0.0627937
Clp	0.359541	0.352424	0.377705	0.369414	0.375104	0.33668	0.567012	0.303923	0.285464	0.27392	0.282206	0.272343	0.3216	0.410746	0.506939	0.279918	0.306169
CG3662	0.517534	0.543098	0.527099	0.451271	0.458954	0.511127	0.713158	0.534864	0.515491	0.481805	0.599364	0.611926	0.747861	0.51581	0.65323	0.442319	0.869855
CG3862	0.162837	0.133553	0.141735	0.127875	0.127024	0.102487	0.139886	0.127026	0.1208	0.126804	0.114736	0.1301	0.143017	0.15955	0.14743	0.106848	0.0913223
dock	0.123554	0.11301	0.109417	0.0992186	0.152109	0.0936461	0.105272	0.106424	0.0744886	0.0810444	0.0789525	0.113661	0.0957567	0.120983	0.034339	0.0844903	0.241105
drongo	1.20835	1.26233	1.1844	1.34239	1.35234	0.918828	1.20754	1.42986	1.34809	1.44633	1.033	1.01403	0.93833	1.35825	1.22543	0.948275	0.175107
CR44060	0.00419039	0.00368667	0.00398011	0.00510056	0.00697985	0.00722501	0.00750262	0.00769247	0.00517364	0.00255155	0.00284426	0.0089715	0.00344521	0.0109798	0	0.00460812	0
CG4291	0.13225	0.12301	0.115997	0.12554	0.110932	0.118829	0.183634	0.101636	0.0941707	0.0733158	0.0784093	0.112124	0.113961	0.111261	0.0911789	0.0853187	0.0948444
kraken	0.446383	0.408537	0.468925	0.402732	0.413165	0.403099	0.443484	0.438742	0.523135	0.524025	0.55409	0.41017	0.518611	0.51305	0.585561	0.49654	0.640933
CG13949	0.00217705	0.000797461	0.00285903	0.000152563	0	0.000924294	0.00372386	0.00114579	0.00163405	0.00172396	0.000839114	0.00222	0.0014334	0.00232857	0	0.00456467	0.0273202
CG13950	0	0	0	0	0	0	0	0.000135162	0	0	0	0	0.000519469	0	0	0	0
aru	0.297269	0.324174	0.239094	0.197573	0.156808	0.150452	0.180382	0.170245	0.172593	0.153555	0.189222	0.18104	0.18393	0.199825	0.156562	0.228125	0.165311
dbe	0.539228	0.59114	0.586075	0.634399	0.707427	0.63186	1.00999	0.639823	0.6191	0.633321	0.632343	0.654585	0.504745	0.921317	1.09525	0.698086	0.428581
PNUTS	0.787283	0.680563	0.61934	0.718288	0.586553	0.644853	0.548728	0.707825	0.578057	0.717714	0.689431	0.659787	0.689939	0.670059	0.439911	0.762636	0.691966
ninaA	0.00132716	0.00111547	0.00104384	0.00166514	0	0.00144589	0.00740694	0.00105241	0.0028194	0.00372854	0.00068459	0.00130202	0	0.00112844	0.00640286	0.000795245	0
CR45348	0	0	0	0	0	0	0	0.000300188	0	0.000661625	0	0	0	0	0	0.000851446	0
Lsp1beta	0	0.000545281	0	0	0	0	0	0	0.000384152	0.000172035	0	0.0045374	0.000681207	0	0	0	0
IA-2	0.000394734	0.000559292	0.00203351	0.00177654	0	0	0	0.00213505	0.000516646	0.000669394	0.000435785	0	0	0	0	0	0.0163579
CG4415	0	0.000579178	0.00228855	0.0011998	0	0	0	0.000900907	0	0.00145462	0.000454711	0	0.00149461	0	0.0023942	0	0
S	0.267901	0.294615	0.272676	0.251685	0.225687	0.189698	0.151748	0.212155	0.160203	0.143919	0.133833	0.133141	0.118075	0.26188	0.0625129	0.256856	0.129854
ast	0.133666	0.137232	0.124808	0.121903	0.147482	0.143639	0.158773	0.126345	0.141201	0.15478	0.152907	0.159656	0.120833	0.199859	0.161465	0.152616	0.17401
Atg4a	0.152901	0.181845	0.139082	0.155877	0.166802	0.151835	0.156337	0.15036	0.122568	0.130425	0.154892	0.187615	0.174625	0.167924	0.181102	0.155121	0.18046
CG4629	0.00327542	0.00181139	0.00196013	0.000677328	0.0124476	0.00251016	0	0.00946329	0.0151833	0.0212235	0.032016	0.0100872	0.00335349	0.00434617	0.0179978	0.021632	0
mtRNApol	0.140294	0.155313	0.157949	0.160788	0.182822	0.190948	0.151942	0.159872	0.18858	0.171498	0.171494	0.170117	0.168318	0.128287	0.20073	0.176086	0.0935079
Pino	0.23524	0.238748	0.256482	0.198983	0.234534	0.236221	0.240319	0.175535	0.19564	0.218534	0.472515	0.227433	0.218975	0.218331	0.220153	0.389624	0.434833
CG4552	0.0687562	0.0565061	0.0600246	0.0647468	0.0537854	0.045433	0.059687	0.0612195	0.0752267	0.0813128	0.0845395	0.0467669	0.091047	0.0385001	0.110418	0.0958389	0.069417
Iris	0.0193671	0.0132864	0.0207649	0.0164964	0.0151995	0.0268396	0.00442866	0.0291369	0.0798187	0.240942	1.12811	0.0440877	0.309929	0.0356222	0.30769	0.53238	2.45634
CG4577	0	0	0	0.000951012	0	0	0	0.000385604	0	0	0.00272398	0	0.000688359	0	0	0.00343083	0.00977059
MFS3	0	0	0	0.000365103	0	0	0	0	0	0	0.000420765	0	0	0	0	0	0
l(2)10685	0.0877448	0.100132	0.0908608	0.0737569	0.115264	0.0840663	0.185925	0.102198	0.111494	0.106338	0.13153	0.133595	0.106382	0.118913	0.18055	0.143394	0.0940091
Tfb4	0.213789	0.169227	0.156972	0.16825	0.171405	0.177429	0.323319	0.116921	0.120255	0.11259	0.115661	0.110226	0.14827	0.175229	0.249518	0.137603	0.0577595
Vps29	0.97773	1.05133	0.988957	1.04365	1.23351	1.04756	1.17484	0.978934	1.00386	0.968047	0.961111	0.995085	1.18163	0.972973	1.06868	0.954595	0.927207
capt	0.314438	0.365964	0.32194	0.321889	0.365947	0.386249	0.305964	0.306257	0.346888	0.295653	0.430202	0.451845	0.683968	0.277284	0.242671	0.304325	1.15068
CR43767	0.000566989	0.000765207	0.00129093	0.000271217	0.0011744	0	0	0.00171185	0.00164527	0.00291538	0.000592543	0.00473371	0.00317071	0	0.00534027	0	0
Tango14	0.60396	0.579497	0.494962	0.58251	0.611706	0.621557	0.63676	0.574884	0.551082	0.593991	0.608541	0.594548	0.62018	0.69029	0.653167	0.665313	0.765422
CG5080	0.00207202	0.00446002	0.00817744	0.00220607	0	0	0.00928503	0.00262718	0.000798157	0.00108466	0.000454501	0.00237821	0.0033776	0	0	0.00101213	0
IntS14	0.201895	0.176574	0.196443	0.180887	0.20048	0.151691	0.360608	0.153709	0.149963	0.154323	0.163497	0.150541	0.159856	0.216319	0.246759	0.12738	0.19373
CG14341	0.107078	0.160368	0.0971408	0.103874	0.132506	0.12983	0.185149	0.119701	0.135042	0.0928818	0.12283	0.132495	0.13538	0.164512	0.121111	0.130087	0.243185
Plap	0.530893	0.569894	0.498818	0.466602	0.39418	0.459548	0.583458	0.416273	0.431433	0.397964	0.388932	0.425248	0.497943	0.495485	0.576031	0.417291	0.436491
CG31922	0.0563889	0.0784373	0.0544992	0.0676485	0.0755331	0.0615642	0.0957006	0.0416678	0.0327332	0.0370168	0.046517	0.0443092	0.0543499	0.0531095	0.0698891	0.0333543	0.0561861
Charon	0.0909025	0.0973321	0.101583	0.0832411	0.0512187	0.0783249	0.113762	0.0862214	0.110645	0.0729621	0.0752266	0.0913644	0.0767738	0.10417	0.100884	0.0941309	0.0582009
CG4887	0.210536	0.220325	0.180767	0.218587	0.213068	0.20617	0.183769	0.184042	0.190249	0.17104	0.192584	0.251425	0.215061	0.221447	0.165796	0.212959	0.22134
CG4896	0.184849	0.199482	0.11328	0.151625	0.164422	0.152303	0.128518	0.117354	0.141306	0.121271	0.133681	0.139691	0.176429	0.12521	0.0877277	0.149334	0.194865
CG5126	0.211556	0.311174	0.303201	0.213123	0.318596	0.235188	0.346437	0.277819	0.286294	0.247913	0.293298	0.286304	0.266753	0.30491	0.407775	0.281015	0.265143
Tgt	0.231172	0.298906	0.260989	0.255871	0.333784	0.272054	0.388127	0.273292	0.325908	0.230768	0.238566	0.297204	0.23136	0.326464	0.373976	0.277715	0.0932307
CG5001	0.00170969	0	0	0.0018253	0.00272681	0.00203662	0.00401999	0.0014566	0.00153685	0.00197592	0.00536236	0.00413908	0.0023632	0.00345716	0	0.00522536	0
CG5397	0	0	0.000948083	0	0	0	0	0	0	0	0	0	0	0	0	0	0
CG5561	0	0	0.00111692	0.000336788	0	0	0	0	0	0	0	0.00114312	0	0	0	0	0
NLaz	0.0332552	0.0678538	0.0816758	0.116921	0.0996651	0.113502	0.0686235	0.0936374	0.0245415	0.00610295	0.00763864	0.070745	0.0179874	0.0786229	0.00718837	0.00989741	0
CG14346	0.0013169	0.00115518	0.00565781	0.00107115	0	0.00599247	0	0.00182031	0.00759419	0.00285725	0.00180685	0.0120904	0.00337907	0.00323043	0	0.00468113	0
robo2	0.0755502	0.090312	0.0700854	0.0636106	0.0653504	0.0613368	0.0257442	0.0992307	0.0426252	0.0185231	0.00300956	0.0596855	0.0279753	0.0546917	0.0105088	0.0165798	0.00702768
CG33128	0	0	0	0	0	0	0	0	0	0	0	0	0	0	0	0	0
CG18131	0.000565705	0.00251634	0	0.000217584	0	0	0	0	0	0.00061392	0.000401231	0	0.000769713	0.00273771	0	0.00210978	0
CG7420	0.0994605	0.104701	0.126959	0.081168	0.153607	0.0628199	0.145722	0.111073	0.112833	0.097508	0.120128	0.0922582	0.084873	0.109696	0.129559	0.109439	0.0351522
haf	0.000823661	0	0	0	0	0	0	0	0.000335705	0.000168017	0.000414848	0	0	0	0	0	0.00702768
CG10869	0.00258094	0	0	0	0	0	0	0	0	0.000907067	0	0	0.00118796	0	0	0	0
CG31935	0.0192897	0.0326673	0.0153776	0.0208014	0.025312	0.0452157	0.0184227	0.0129996	0.014784	0.0239471	0.0270695	0.0310112	0.0285412	0.00806704	0.0174811	0.0257589	0.0155946
CG14352	0.0637975	0.0667792	0.0458072	0.0548267	0.0544631	0.0676517	0.10909	0.0387795	0.0261563	0.0321585	0.0370486	0.0409813	0.0426711	0.0474914	0.0337199	0.0324831	0.0331117
RFeSP	6.32532	6.08919	6.97952	6.66747	6.54769	6.584	7.37285	7.4389	7.82757	7.91971	9.00044	7.33683	8.33698	7.80698	8.71336	7.26135	8.30777
chinmo	0.00863847	0.011903	0.0113603	0.00770386	0.00693669	0.0289805	0.0047979	0.0153893	0.00703483	0.00967032	0.0146353	0.00867924	0.0151558	0.0188898	0	0.0287531	0.006508
cpb	0.63295	0.646687	0.716094	0.606042	0.617581	0.652878	0.708356	0.612721	0.560967	0.540239	0.530016	0.655999	0.706695	0.730691	0.811907	0.538458	0.629215
CG17660	0.183269	0.138015	0.150187	0.130313	0.103117	0.152156	0.189728	0.121965	0.105423	0.129149	0.122801	0.119638	0.14296	0.151101	0.136053	0.12002	0.100726
CR44976	0	0.000372806	0.000854275	0	0	0.00721232	0	0	0	0.000351537	0	0	0.00066952	0	0	0.00150933	0
mRpL48	0.988105	0.898542	0.931881	1.01993	1.06686	1.01389	1.18909	0.992263	1.06311	1.06752	0.992038	1.02779	1.08094	1.23827	1.4253	1.00515	0.681927
frtz	0.0237343	0.0253332	0.0360144	0.0211836	0.00737154	0.0342132	0.0229191	0.0249445	0.0224936	0.0222581	0.0227044	0.0405925	0.028776	0.0197685	0.0290203	0.021064	0.011925
Rim2	0.233669	0.195121	0.230793	0.217578	0.149693	0.243043	0.1862	0.177222	0.201624	0.172826	0.163399	0.225873	0.171464	0.177307	0.130226	0.148579	0.177675
Eno	4.19683	4.12729	4.5243	3.72785	3.00526	3.67578	4.93345	3.83473	3.95271	4.05562	4.6753	3.98305	4.82539	4.36664	4.70104	3.62627	5.92047
Rrp40	0.845261	1.03419	0.984224	1.1632	1.3781	1.20205	1.49031	1.17865	1.24005	1.33018	1.28479	1.10335	0.996526	1.40459	1.89162	1.20818	0.721814
CG31937	0.266093	0.369453	0.323304	0.206788	0.241554	0.221137	0.339132	0.308743	0.48803	0.545031	0.750759	0.277781	0.584156	0.36166	0.519575	0.554749	0.636605
CG17652	0.0834078	0.0974229	0.0934431	0.115148	0.128225	0.121784	0.161739	0.12586	0.114001	0.132571	0.135829	0.130223	0.111597	0.162905	0.226278	0.130794	0.0276516
CG17646	0.0393381	0.037795	0.0271	0.02274	0.0108807	0.0279222	0.00325195	0.0259763	0.025621	0.0319649	0.0894215	0.0204591	0.064841	0.0112558	0	0.040189	0.225641
CG17712	0.21302	0.199936	0.196766	0.205567	0.197254	0.226424	0.213028	0.220885	0.220895	0.208486	0.201074	0.246213	0.210729	0.246255	0.195091	0.239779	0.214156
CG17648	0.000816851	0	0.000370284	0	0	0.00113248	0.00452964	0.00100882	0.00115094	0.000623998	0.000479031	0	0.000218746	0	0	0	0
CG17650	0.00870896	0.0070432	0.00712514	0.00798272	0	0.00982051	0.00976113	0.0170966	0.0217807	0.00888361	0.00834292	0.0210266	0.00860259	0.0154691	0.0241612	0.0120902	0
CG31663	0.0184096	0.013154	0.0235473	0.0101949	0.00472152	0.00947782	0.0142889	0.00413752	0.000757818	0.00108427	0.000430303	0	0.000584439	0	0	0.00259188	0
Wdr62	0.809866	0.822052	1.06212	0.961055	0.912685	0.983753	0.802362	0.877554	0.604649	0.738969	0.712164	0.830531	0.436215	0.735823	0.571063	0.64798	0.898811
Der-1	0.542837	0.59522	0.482811	0.55123	0.605171	0.528349	0.5892	0.478076	0.483805	0.450728	0.439976	0.46648	0.459686	0.588876	0.452932	0.471029	0.847624
CG15356	0.147831	0.102882	0.116376	0.0975298	0.0822666	0.0946963	0.0619074	0.0631384	0.0950128	0.0995805	0.0785508	0.0655239	0.0851278	0.0738517	0.089966	0.0907922	0.0428489
CG15362	0.0320844	0.0382451	0.0353046	0.0404608	0.0304186	0.0527149	0.0544295	0.0509949	0.070726	0.055469	0.0894222	0.0549159	0.0620031	0.0601249	0.0909435	0.0521202	0.0836494
CG7289	0.173308	0.167661	0.115394	0.141002	0.160448	0.143354	0.164796	0.142313	0.143578	0.15277	0.159552	0.196345	0.21445	0.189769	0.183106	0.131343	0.250836
Got2	0.583025	0.618313	0.644454	0.667424	0.676284	0.791638	0.662008	0.767775	0.813071	0.801856	0.776424	0.864158	0.826008	0.635457	0.684969	0.611376	1.15272
Npc2a	0.831633	0.814794	1.32127	2.19498	2.36159	2.21384	1.81381	3.69553	3.88825	3.52556	3.70803	3.90692	4.13357	3.78557	3.69842	4.15405	3.20743
CR42874	0.00817211	0.00613628	0.0076877	0.00859876	0	0.0071902	0.00267189	0.013333	0.0116323	0.00773146	0.00628749	0.0119521	0.00479105	0.00776391	0.0147608	0.00509264	0
CG15353	0.000907732	0	0	0.00147288	0.0011225	0	0	0	0	0.000259528	0.00041919	0	0.000760067	0.0108372	0	0	0
Nplp4	0.00175749	0.000636174	0.000223002	0.00163639	0	0	0	0	0	0.000297922	0	0	0.000449496	0	0	0	0
CG4238	0.290627	0.296046	0.177024	0.272463	0.286317	0.335308	0.222028	0.189594	0.210913	0.261216	0.255399	0.22771	0.31189	0.166852	0.23325	0.23215	0.130259
Su(dx)	0.0715386	0.0655437	0.0583562	0.0527175	0.0319242	0.0690989	0.0435455	0.0600212	0.0733047	0.0745214	0.0845849	0.0644027	0.0777305	0.0290995	0.046952	0.0784623	0.0394764
CR45298	0.000931739	0	0	0	0	0	0	0	0	9.70468e-05	0	0	0.000900299	0	0	0	0
Kebab	0.0440538	0.068808	0.0542608	0.0458633	0.0548637	0.0553893	0.0556688	0.0363025	0.0243102	0.0199135	0.0154192	0.0261026	0.0178435	0.0370836	0.0307002	0.0228626	0.0132765
GlyP	0.221101	0.217207	0.261656	0.263671	0.257659	0.240556	0.246707	0.35532	0.605633	0.835334	1.02969	0.35926	0.699097	0.380456	1.05839	0.609751	0.480041
tho2	0.381502	0.352381	0.301254	0.320147	0.280729	0.331976	0.230026	0.263847	0.273628	0.289858	0.258304	0.315222	0.289649	0.270252	0.202712	0.259402	0.289878
CG11723	0.0808986	0.098279	0.0652503	0.0712691	0.0701456	0.0451282	0.0945042	0.0599365	0.0596956	0.0635543	0.0759748	0.0514956	0.0530781	0.0698567	0.0442112	0.0706642	0.084434
TBCD	0.129361	0.14269	0.116935	0.101577	0.135656	0.102609	0.106632	0.0971303	0.0914639	0.079976	0.0934867	0.0835121	0.0977217	0.101005	0.0886049	0.0757059	0.0905697
AIF	0.270217	0.257657	0.257752	0.322201	0.386774	0.325406	0.424291	0.35722	0.366882	0.342069	0.421718	0.400481	0.386652	0.508596	0.53763	0.376166	0.238639
CG15382	0.0187036	0.0162625	0.0111598	0.0172167	0.0103056	0.0136751	0.00286537	0.0218788	0.0120145	0.0234188	0.0126511	0.0198345	0.0195051	0.00250426	0.0273208	0.0157783	0.00957524
aop	4.80254	4.43054	3.84701	3.55038	3.66683	4.74996	2.25201	2.38204	1.53043	1.16522	0.825334	3.96158	3.59915	2.12796	0.634163	1.8801	1.16965
CR43751	0.000717121	0	0	0.00107291	0	0	0.0106624	0	0.000513287	0.000343415	0	0.00212789	0.000877028	0	0	0	0
CG10874	0.080881	0.0827182	0.0748511	0.0932037	0.100401	0.0923854	0.0983932	0.063937	0.0702489	0.0727717	0.0755977	0.0778233	0.107508	0.0750978	0.115115	0.0727263	0.0610711
CG34172	0.00370406	0.000779362	0.00318595	0.000906485	0	0.00394504	0	0	0	0	0.000967885	0	0.00110979	0	0	0.0010843	0
CG15385	0.00394132	0.00485777	0.00281744	0.00439253	0	0	0	0.0050598	0.000918733	0.00166627	0.0018896	0.00858222	0.00319897	0.0140337	0	0.000506346	0
Uch	1.46907	1.51969	1.36498	1.28286	1.06914	1.51445	1.60604	1.09921	1.11678	0.862434	0.690519	1.43669	1.29522	1.22755	1.04455	1.00792	0.913085
CG34174	0.173742	0.147428	0.152467	0.179482	0.0957764	0.166762	0.212252	0.114497	0.106479	0.123813	0.114941	0.126726	0.134268	0.165681	0.134379	0.130022	0.102239
CG10880	0.298858	0.340425	0.243636	0.295742	0.339921	0.276029	0.413713	0.238164	0.253246	0.187245	0.218589	0.225285	0.257258	0.309346	0.312031	0.252535	0.129377
mio	0.145271	0.137319	0.121193	0.116611	0.152272	0.138036	0.101543	0.102417	0.0875025	0.084905	0.0903931	0.0938722	0.0772858	0.128463	0.135048	0.0945621	0.066586
papi	0.260365	0.335112	0.265526	0.290953	0.256327	0.284099	0.30571	0.233647	0.24933	0.237183	0.205085	0.264324	0.196722	0.226778	0.310036	0.234326	0.129391
CG15387	0.256716	0.239003	0.193324	0.197243	0.188198	0.233811	0.274611	0.18334	0.186569	0.170861	0.150182	0.192832	0.198127	0.21948	0.191175	0.194642	0.230226
sau	0.641197	0.595788	0.596293	0.558085	0.496268	0.570461	0.568615	0.510709	0.411712	0.434347	0.404971	0.468404	0.487193	0.524933	0.38541	0.492751	0.463193
CR44114	0.00363555	0.00480935	0.00673047	0.00470869	0	0	0.00731491	0.00443585	0.00353412	0.00645589	0.00258757	0.00252372	0.00802679	0	0	0.00514734	0
Sec24CD	0.236038	0.25394	0.214641	0.235983	0.150379	0.260537	0.183195	0.219925	0.237563	0.239248	0.299976	0.237388	0.266042	0.22407	0.228953	0.257178	0.76285
CR44115	0.000688896	0	0.000859734	0	0	0	0	0	0	0.000275408	0	0	0.000936923	0	0	0.00108841	0
CG4267	0.000382234	0.000931669	0.00119843	0.00160006	0	0	0	0.000781609	0.001798	0.000159827	0.000851219	0.0033771	0.000665024	0	0	0.000900201	0
CR42859	0	0	0	0	0	0	0	0	0	0	0	0	0	0	0	0	0
CR43754	0.0037352	0.00566732	0.00602717	0.00202575	0	0.00138281	0.00701829	0	0.00120302	0.000259528	0	0.00275488	0	0	0	0	0
CG31681	0.000766316	0.00190269	0	0.000723158	0	0	0.00325495	0	0	0	0	0	0	0	0	0	0
CG9967	1.00312	1.07668	0.673677	0.410598	0.306676	0.501759	0.690586	0.111601	0.088695	0.0720315	0.0771614	0.167562	0.0845313	0.11619	0.0594917	0.0758487	0.0358169
eys	0.0301428	0.0188039	0.0323267	0.00855268	0.00213125	0.0147101	0.00740846	0.00369147	0.00165294	0.000388642	0	0	0	0	0	0.000777869	0
Rab5	1.18837	1.07887	1.01789	1.03162	0.838402	1.12573	1.19817	1.00454	0.959637	0.983477	1.03485	0.995322	1.14238	0.985328	1.05638	0.991731	0.990488
Axud1	0.21471	0.204313	0.195844	0.189423	0.112775	0.183138	0.106256	0.172536	0.129383	0.160464	0.169981	0.180839	0.174575	0.154708	0.0991656	0.191932	0.160103
CG3597	0.00124185	0.00089931	0.00114949	0.00154119	0	0	0.0113701	0.00820177	0.00386902	0.00329437	0.00094565	0	0	0.0030626	0	0	0
CG3609	0.452935	0.617048	0.61153	0.534285	0.563987	0.588088	0.745433	0.75383	0.810739	0.745796	0.775448	0.760797	0.870864	0.803766	0.943102	0.726966	0.719877
CG15390	0.054952	0.0486533	0.0542055	0.0649805	0.114796	0.0621926	0.114652	0.0848524	0.0783288	0.0767149	0.0841085	0.0776089	0.0643669	0.147066	0.181405	0.069419	0.0623503
CR44982	0	0.00064839	0	0.000186988	0	0	0	0	0	0.000625329	0.000535156	0	0	0	0	0	0
Atxn7	0.09667	0.100212	0.101661	0.102918	0.0764693	0.0766786	0.0652019	0.1149	0.102324	0.09366	0.0909343	0.129161	0.111663	0.134133	0.0646273	0.0772658	0.0884719
Eogt	0.154331	0.141958	0.103705	0.102392	0.102709	0.140568	0.131561	0.0826477	0.113043	0.0835035	0.104406	0.0837248	0.125687	0.0700909	0.0804127	0.0948923	0.0644578
PIG-Wa	0.0559786	0.0686156	0.0402879	0.0552073	0.0774303	0.0430037	0.0594955	0.0403377	0.0306743	0.0343601	0.0390308	0.0258913	0.0446651	0.0449899	0.0556779	0.0401921	0.0692206
VGlut	0	0	0	0.000384452	0	0	0	0.0003429	0	0	0.000250622	0	0	0	0	0	0
CG9886	0.0274325	0.0371903	0.0319066	0.0341274	0.057546	0.0356882	0.0136534	0.0252697	0.0352556	0.0242471	0.0294645	0.0332502	0.0272322	0.0267408	0.0206098	0.0189424	0.0549783
dpp	0.00350544	0.00436059	0.00875884	0.00942988	0.00697985	0.0255136	0.013563	0.0293763	0.0532154	0.0173024	0.0165814	0.0421928	0.487318	0.0236177	0	0.000506346	0.00642707
Slh	0.182229	0.183809	0.164295	0.192362	0.231115	0.17127	0.24645	0.207843	0.182694	0.211809	0.267559	0.194429	0.219359	0.216057	0.299032	0.263319	0.497989
oaf	0.152321	0.184563	0.187868	0.157565	0.16963	0.165709	0.161214	0.131707	0.16857	0.142732	0.146145	0.162582	0.156867	0.111967	0.0876168	0.149641	0.175192
Cyp309a1	0.000475571	0.00326127	0	0.00178749	0	0	0	0.0012053	0	0.00145282	0.00056393	0	0.000944952	0	0	0.00216038	0
Cyp309a2	0	0.00121967	0.000358984	0.000331014	0	0	0	0	0.000871066	0.000329805	0	0	0	0	0	0	0
insv	0.02445	0.0305012	0.0420034	0.0227298	0.0258443	0.0285313	0.0295878	0.0172253	0.0249629	0.0126475	0.0114016	0.030848	0.0246561	0.00947426	0.00875233	0.0168573	0.0109088
Elba2	0.00950312	0.0193437	0.0268654	0.00883054	0	0.0122018	0.0288832	0.0227168	0.0237875	0.00622284	0.00426453	0.0432615	0.012664	0.0404509	0.0150344	0.0141522	0.00916758
ND-B17.2	2.1912	2.12777	2.37664	2.1386	2.08474	2.2732	2.37371	2.16701	2.25299	2.28308	2.52423	2.19301	2.72068	2.1408	2.44688	2.24175	2.42185
Arpc5	2.72573	2.48187	2.68196	2.3315	2.11497	2.30121	2.77248	2.17248	2.05412	1.91216	1.87042	2.2968	2.2846	2.26063	2.13258	1.84939	1.90292
Drp1	0.458405	0.455732	0.501031	0.399055	0.419831	0.380052	0.549499	0.412033	0.35616	0.323155	0.330166	0.371106	0.418796	0.38335	0.463483	0.316607	0.264627
CG31690	0	0	0	0.000229162	0	0	0	0.000256777	0.00122544	0.000326195	0	0.00149047	0	0	0	0.00124551	0
CG15398	0.000389917	0	0	0.000457093	0	0	0	0.000209131	0.000444152	0.000100983	0.000793039	0	0.000198671	0	0	0	0
CG31689	0.141153	0.13735	0.110929	0.0767902	0.0712444	0.132395	0.0353305	0.0425571	0.0559936	0.0306233	0.0603511	0.127539	0.106876	0.0427255	0.0197209	0.0973887	0.225773
Hrs	0.0608379	0.0485373	0.0717722	0.0684344	0.0459431	0.0700072	0.0286599	0.0641269	0.0705894	0.0784387	0.0856768	0.0627034	0.12715	0.0786833	0.0496066	0.0807853	0.0472332
CG9961	0.0116424	0.0182676	0.00616591	0.0112837	0	0.00736754	0.0106923	0.0082208	0.00534607	0.00479577	0.00610683	0.00662218	0.00595975	0.0115454	0.00428663	0.00450994	0
Cwc25	0.345429	0.423318	0.477023	0.311639	0.325632	0.332114	0.297402	0.183649	0.559311	0.382394	0.420522	0.203067	0.406974	0.169648	0.300429	0.377139	0.292769
Pgk	3.61071	3.77854	3.95797	3.44016	3.37688	3.59707	4.34631	3.37482	3.60426	3.91448	4.54603	3.18663	4.25182	3.75717	4.79056	3.63687	3.50509
Bacc	35.1308	26.2971	22.1072	31.341	25.1826	26.7768	26.039	13.8897	11.2539	20.6627	13.3839	12.4174	13.0824	13.1095	17.1151	19.613	11.8754
CR44772	0.00130544	0	0.00111654	0.000957231	0	0	0	0.00204856	0	0.000403065	0.000196236	0.00372451	0.00105678	0	0	0	0
Trn-SR	0.0764927	0.0681679	0.063138	0.0682135	0.0503747	0.0680284	0.0668831	0.0512061	0.0682129	0.0440455	0.0578335	0.0383449	0.0586896	0.0301527	0.0982994	0.0629333	0.110103
CG3077	0.0482394	0.0439754	0.0312547	0.0419495	0.0319102	0.0427288	0.0369304	0.0338469	0.038628	0.0509458	0.0543845	0.0352303	0.0793266	0.0446691	0.0345685	0.0359698	0.117498
aph-1	0.404149	0.367499	0.302595	0.324821	0.206958	0.310772	0.43299	0.248075	0.225045	0.248279	0.254758	0.259487	0.294564	0.247504	0.248628	0.227413	0.277976
Taf10b	1.30722	1.196	1.18796	1.18492	1.32417	1.29621	1.60795	1.00935	0.935915	0.888962	0.834362	1.12577	0.99301	1.34985	1.17214	0.983742	0.640116
Taf10	0.906355	0.926548	0.872173	0.917455	1.00969	0.916982	1.10277	0.769299	0.739413	0.764154	0.803152	0.859544	0.904348	0.9071	1.0272	0.833328	0.837507
colt	1.04758	1.13074	1.21493	1.09976	0.931478	1.08799	1.3735	1.12171	1.05834	1.01984	1.0634	1.10532	1.2079	1.13333	1.12515	1.02207	1.15041
CG2862	5.22383	4.88258	5.09984	4.9733	4.83757	5.14148	6.03158	4.93035	4.91219	4.6365	4.66187	5.30102	4.73028	5.60567	5.80247	4.89816	4.26655
CG15399	0.00108548	0.00164872	0.000693521	0.000512206	0	0	0	0.000521822	0	0	0	0	0	0.00213557	0	0	0
Syt1	0	0	0.000467505	0.000403874	0	0	0	0.000974015	0	0.00116359	0	0	0.000739937	0.00345347	0	0	0
daw	0.00432245	0.00887471	0.0040552	0.00512385	0.0116932	0.00915925	0.0162456	0.0109868	0.0261298	0.00818113	0.0214313	0.0145384	0.0517886	0.00629697	0	0.00725784	0.0196918
G6P	0	0.000913401	0	0	0	0	0	0	0	0	0	0	0	0	0	0	0
Duox	0.0195214	0.0223502	0.0129162	0.00510682	0	0.00366049	0.00882117	0.00162822	0.000962237	0.00242402	0.00139834	0.0060401	0.00128112	0	0	0.00216475	0
CG3117	0	0	0	0	0	0	0	0	0	0	0	0	0.00210024	0	0	0	0
CG3104	0.00295601	0.00133984	0.00361488	0.00609799	0	0.00771811	0.00647012	0.00319012	0.00604074	0.00203415	0.0019399	0.00545627	0.00827471	0.00124913	0.00535059	0	0.0175503
RpS21	35.0029	34.4822	34.7645	35.7105	36.8367	36.6249	29.5796	36.7417	37.659	38.4127	38.7593	37.7914	38.4322	33.993	31.0591	37.761	34.9258
CG2991	0.0634152	0.0555545	0.0591779	0.0583097	0.0242666	0.0458351	0.0192703	0.0494752	0.0391159	0.0430654	0.0407204	0.0675997	0.0543827	0.0163759	0.0290236	0.0492552	0.0413914
CG31694	0.469961	0.485028	0.484877	0.508692	0.686977	0.56659	0.567339	0.562816	0.667525	0.66167	0.710434	0.503017	0.70419	0.57623	0.667609	0.507294	0.592251
CG8814	0.118983	0.0900329	0.116965	0.101929	0.0773876	0.111372	0.128051	0.105839	0.093491	0.0907829	0.0871944	0.121764	0.1238	0.0963253	0.100568	0.11555	0.092029
Prx6005	1.37606	1.36389	1.37582	1.32069	1.18342	1.27162	1.41208	1.04912	1.08768	1.05788	0.950256	1.05373	1.04715	1.1842	1.03907	1.00275	0.699051
CG31950	0.58271	0.599155	0.580953	0.59673	0.785678	0.582492	0.754483	0.627389	0.642473	0.653436	0.660036	0.620499	0.698821	0.736578	0.831896	0.646094	0.446073
betaggt-II	0.311418	0.32953	0.308446	0.34417	0.374722	0.400904	0.392075	0.352184	0.360056	0.487082	0.503385	0.404293	0.481489	0.403435	0.540062	0.433134	0.606994
NTPase	0.117689	0.147488	0.131317	0.103517	0.108936	0.109076	0.128463	0.124898	0.132764	0.10603	0.158305	0.125574	0.158975	0.144863	0.0925546	0.141505	0.13626
lilli	0.504088	0.45287	0.466426	0.376483	0.340106	0.383803	0.340621	0.403044	0.378596	0.329122	0.273398	0.338972	0.313592	0.339567	0.137889	0.315929	0.19274
Rbp9	0.00708961	0.0147711	0.0155098	0.00870188	0.00103256	0.00121622	0.00534451	0.0104604	0.0102089	0.00209244	0.00342332	0.0181177	0.00746933	0.0131775	0.00414986	0.00476392	0.0104349
Ts	0.512357	1.23368	1.61742	0.348133	0.551117	0.405264	1.47549	0.183961	0.852533	0.43691	0.473024	0.169578	0.542053	0.282654	0.790452	0.509312	0.239949
Rrp1	0.911158	1.10798	1.10919	0.687411	0.797676	0.654468	0.832793	0.376344	0.387505	0.26483	0.124996	0.363916	0.290223	0.41011	0.33837	0.265747	0.0856187
gammaTub23C	0.213369	0.272099	0.229106	0.170493	0.156515	0.15968	0.30102	0.114894	0.103532	0.0783467	0.0425457	0.11087	0.0902555	0.128842	0.125411	0.0565294	0.0511107
CG9641	0.0645857	0.0800156	0.0678346	0.0569616	0.0552584	0.07934	0.0581069	0.0900657	0.0923991	0.0429753	0.0730511	0.105682	0.0920111	0.0673254	0.044131	0.0492597	0
CG3165	0.109898	0.198453	0.134926	0.140613	0.287633	0.150274	0.159836	0.123475	0.124362	0.0857234	0.0968188	0.124898	0.104242	0.152026	0.0636512	0.117888	0.0873805
CG9643	0.528123	0.633323	0.617092	0.681788	0.793551	0.657931	0.824849	0.657225	0.705321	0.789935	0.851899	0.6134	0.624275	0.778089	0.985373	0.738517	0.460118
Chd1	0.350968	0.312694	0.306056	0.315435	0.2704	0.333335	0.228345	0.286959	0.294875	0.313641	0.300097	0.270828	0.305672	0.193441	0.181881	0.291353	0.313183
Bem46	0.269216	0.286405	0.284544	0.231628	0.275678	0.27592	0.293927	0.255969	0.23936	0.221236	0.207949	0.251406	0.280278	0.185025	0.211613	0.184713	0.272382
okr	0.0910657	0.104223	0.103421	0.0809796	0.108669	0.0869531	0.0912744	0.0495616	0.0931528	0.0705668	0.0623736	0.0370692	0.0661312	0.0432312	0.110697	0.073739	0.0623656
CG3558	0.188746	0.169772	0.190733	0.172993	0.165072	0.175081	0.136917	0.171486	0.152124	0.161274	0.137866	0.161721	0.175155	0.10741	0.0620375	0.159426	0.138315
CG17265	0.383218	0.337209	0.291744	0.208507	0.149765	0.178713	0.18605	0.151255	0.182921	0.296957	0.890552	0.119536	0.221908	0.135872	0.305506	0.441791	1.11926
CG17224	0.328403	0.349953	0.292989	0.196069	0.185155	0.265516	0.289611	0.285253	0.331264	0.247481	0.43757	0.374853	0.42676	0.229766	0.233248	0.384984	0.566218
CG17264	0.00692895	0.00828097	0.00329674	0.00662796	0.00955277	0.0108099	0.0159549	0.00152331	0.0050772	0.00140428	0.0022576	0	0.00505329	0.00266073	0.00570751	0.00211297	0
alpha4GT1	0.193969	0.195291	0.157877	0.14379	0.105846	0.179665	0.122745	0.124128	0.124676	0.101538	0.10297	0.13626	0.133531	0.139149	0.113296	0.0985648	0.214205
CG3542	0.709542	0.614052	0.68389	0.672743	0.587842	0.601587	0.581635	0.489235	0.463564	0.463077	0.402904	0.438047	0.479246	0.469303	0.37411	0.454144	0.299867
Sf3b2	0.962318	0.935022	0.864653	0.870841	0.893338	0.936131	0.916	0.795657	0.823661	0.852173	0.727502	0.817429	0.768223	0.75539	0.708827	0.795388	0.443065
CG17219	0.198707	0.323118	0.232952	0.313551	0.375801	0.269873	0.397606	0.271252	0.375766	0.362482	0.344565	0.249965	0.244279	0.322137	0.478619	0.331985	0.30673
GABPI	0.249897	0.255138	0.258912	0.208065	0.265761	0.229986	0.38324	0.164132	0.232624	0.21385	0.204327	0.217159	0.273264	0.275918	0.351425	0.213438	0.317932
CG17258	0.00511552	0.00724045	0.00538508	0.00923137	0	0.0075548	0.0110337	0.00709832	0.00240701	0.00554134	0.00709318	0.00439854	0.00215415	0.00666621	0.00633277	0.00665699	0.0274891
SerRS	1.53349	1.74512	1.75585	1.91584	2.24002	1.92113	3.10828	1.98745	2.04015	2.13145	2.23582	1.99385	1.69161	2.67465	3.44403	2.30556	3.53224
CG17260	0.0554046	0.0422136	0.0329543	0.0464555	0.0393686	0.0386455	0.0314889	0.0501123	0.0527875	0.0681858	0.0762081	0.0480193	0.0694813	0.0633337	0.0789911	0.0757935	0.0590551
cnir	0.0369982	0.0225999	0.0333788	0.0414231	0.00704131	0.0165274	0.022594	0.026338	0.026884	0.030282	0.0264685	0.0459518	0.0225518	0.0126553	0.0448906	0.0292735	0.0158436
CG17221	0.144259	0.175963	0.148425	0.149774	0.18236	0.16866	0.197254	0.125666	0.0982943	0.105847	0.114883	0.0841424	0.119933	0.194594	0.112821	0.11119	0.135455
CG17261	0.0037235	0.00457598	0.00569911	0.00651351	0.0032048	0.00253703	0.00245421	0.00536274	0.00391812	0.00654406	0.0011133	0.00219138	0.00162533	0.00459822	0	0.00412926	0
FASN2	0.0004759	0.00362922	0.00408562	0.00270027	0.00110555	0	0	0.00118229	0.00148301	0.000251731	0	0.00117516	0.00104924	0.000585343	0	0	0
snRNA:LU	0.00279262	0.00111555	0.00100899	0.000884545	0.00393418	0	0	0.000457869	0.000857337	0.000356996	0.000443055	0	0.00184974	0	0	0.0023955	0
snRNA:U5:23D	0	0	0	0	0	0	0	0	0.00181494	0.000268621	0	0	0.00187723	0	0	0	0
FASN1	0.498469	0.655629	0.482538	0.447132	0.379423	0.594055	0.262941	0.256051	0.156071	0.204271	0.0955924	0.325205	0.192509	0.201476	0.0604575	0.206646	0.0893021
toc	0.0882507	0.0753813	0.0557427	0.0785534	0.0869152	0.0606153	0.0504793	0.142473	0.233664	0.20429	0.231773	0.137879	0.194046	0.109374	0.172052	0.105205	0.099154
ND-B14.5B	2.61866	2.91769	3.04454	3.02296	3.29585	2.82938	2.80326	3.10091	3.09237	3.09172	3.13434	3.24898	3.16643	2.93119	2.52637	2.7761	1.96231
Mad	0.338716	0.339969	0.365716	0.271545	0.268667	0.2461	0.341642	0.235795	0.24196	0.176292	0.218324	0.2602	0.243765	0.225758	0.184035	0.253885	0.114153
gkt	0.0130721	0.0157356	0.00961738	0.0117597	0.00894594	0.0150484	0.00825103	0.00556542	0.0110007	0.00846079	0.0113767	0.00588658	0.0113821	0.00567028	0.0224432	0.00742274	0
Hydr2	0.161228	0.187297	0.208922	0.135675	0.166639	0.153885	0.231145	0.132398	0.207655	0.143095	0.222072	0.157017	0.245815	0.101642	0.123341	0.123306	0.568913
CG44002	0.0150094	0.0273013	0.024643	0.0226362	0.0131547	0.0145384	0.0246281	0.0189766	0.0104418	0.0134728	0.0108677	0.0162475	0.0122349	0.0241501	0.018076	0.010725	0
CR44003	0.00215609	0.00235918	0.0083329	0.0024336	0.0054078	0	0	0.0041988	0.00202608	0.00105003	0.00144918	0.0138313	0	0.00259939	0.0052745	0	0
CG15404	0	0	0	0	0	0	0	0.000447803	0	0	0	0.0041772	0	0.00161699	0	0.000886284	0
CG9664	0	0.00115411	0.00120688	0.000982538	0	0.00147725	0	0.00253783	0.000247613	0.000974481	0	0.00245623	0.00134006	0	0	0	0
CG9663	0.0171852	0.0232757	0.0185798	0.0127487	0.0179233	0.0134034	0.0188738	0.0205784	0.0248566	0.0128753	0.0122841	0.0191073	0.0254942	0.00864953	0.0128035	0.0165102	0
CG3277	0.000648319	0	0	0	0	0	0	0	0	0	0.000268036	0	0	0.00108628	0	0	0
Fign	0.0244931	0.0536935	0.0257944	0.0188554	0.0402825	0.0300897	0.0217941	0.0133605	0.0206402	0.00659331	0.00949696	0.00279238	0.00682062	0.0181263	0.00862946	0.0097872	0
CG8837	0	0	0	0	0	0	0	0	0	0	0	0	0	0	0	0	0
E23	0.52245	0.580401	0.350865	0.230102	0.235841	0.381769	0.255232	0.183696	0.102602	0.0298014	0.00937069	0.292663	0.234131	0.15714	0.0252776	0.151612	0.0270472
CG34394	0.101393	0.100076	0.0981981	0.0873608	0.0768422	0.0983123	0.0647952	0.0866233	0.0718049	0.074491	0.111424	0.0820292	0.118308	0.0880395	0.0245649	0.129544	0.113523
CG15412	0.00336989	0.0005265	0.00260192	0.00115903	0.00681886	0	0.0041763	0.00174454	0	0.00070629	0.00118649	0	0.000739937	0	0	0.0026594	0
CG9662	1.02102	0.936084	0.912815	0.804268	0.697387	0.913441	0.811708	0.689783	0.641025	0.540722	0.497415	0.690042	0.670375	0.69397	0.526327	0.60536	0.692246
Ptpa	0.409152	0.404969	0.374883	0.353634	0.353006	0.325526	0.416307	0.20416	0.269093	0.274542	0.258592	0.196761	0.306487	0.221301	0.296557	0.274333	0.284339
pgant2	0.00215527	0.000508852	0.00208856	0.000325194	0.00368964	0	0	0.00149558	0.00162233	0	0.00189352	0	0.00106148	0	0	0	0.006508
CG2772	0	0.000552507	0	0	0	0	0	0	0	0	0	0	0	0	0	0	0
Snx1	0.297255	0.31876	0.269486	0.297171	0.286828	0.280875	0.348681	0.273067	0.255638	0.234601	0.216508	0.256467	0.281561	0.293271	0.325736	0.19053	0.248899
CG12795	0.229221	0.184419	0.270341	0.241701	0.13857	0.247151	0.267436	0.305342	0.298779	0.250374	0.264795	0.339555	0.277979	0.229139	0.218122	0.23598	0.178003
Cog3	0.0583399	0.0544354	0.0534976	0.0684324	0.0348213	0.0671038	0.0353869	0.0619411	0.0482625	0.0615238	0.0725231	0.0712059	0.0657341	0.0633112	0.04954	0.0744662	0.0853985
Sec5	0.1037	0.0988081	0.0861837	0.0925096	0.0781704	0.0951076	0.10613	0.0771607	0.075897	0.0917984	0.0942392	0.0720958	0.0860235	0.114953	0.109046	0.0889561	0.120893
CG3246	0	0.000533521	0	0.00246123	0	0	0	0.000766297	0.000793943	0.0011807	0.000611977	0	0	0	0	0	0
msl-2	0.0441643	0.0335797	0.0430761	0.0285348	0.0253672	0.0471399	0.0635524	0.0339517	0.0164369	0.0386261	0.0239734	0.0439242	0.0283829	0.014758	0.0116014	0.0175587	0.0214604
ND-PDSW	4.96609	4.78918	4.98198	5.11011	5.09134	5.09294	5.19279	5.6917	6.01396	6.25009	6.59303	5.5578	6.50134	5.28315	6.29146	5.47142	5.53389
CG3238	0.0746852	0.088717	0.0930837	0.0747144	0.10317	0.0887452	0.125761	0.0515532	0.148256	0.0761975	0.0883149	0.0554463	0.0909745	0.0918961	0.12027	0.0925233	0.150831
CG31776	0	0	0.00105908	0	0	0	0.00120435	0	0	0	0.000671406	0	0	0	0	0	0
pgant4	0.00123518	0.000703501	0	0.00102271	0	0.00429739	0	0.000913014	0.00204799	0	0.000793444	0.00162413	0.001106	0	0	0.000777741	0
Thor	1.5827	1.68504	0.836271	1.19748	0.240512	1.00409	0.444895	0.960873	0.637274	0.688516	0.559993	0.760269	0.291939	0.464989	0.148146	0.626332	0.828641
CG15414	0.000875162	0	0.000855501	0.00128832	0	0.00169242	0	0.00224163	0.00140604	0.000841699	0	0	0	0	0	0	0
tim	0.441427	0.440892	0.306659	0.293674	0.147319	0.276043	0.222384	0.217068	0.125584	0.117729	0.0833427	0.143544	0.11854	0.145272	0.0690269	0.20246	0.0701433
CG31954	0.000533007	0	0	0.000528008	0	0	0	0.00140728	0.00101572	0	0.000294712	0	0.00149732	0.00270929	0.0067297	0	0
LeuRS	0.456373	0.444111	0.484305	0.539824	0.452851	0.51398	0.410996	0.586527	0.615515	0.63237	0.65933	0.586548	0.557316	0.619456	0.670959	0.660395	0.712414
CG17593	0.425969	0.439478	0.422333	0.46674	0.5014	0.516088	0.491907	0.494327	0.570071	0.552816	0.588409	0.586368	0.623583	0.561389	0.691741	0.52779	0.772149
CG3213	0	0	0	0	0	0	0	0	0	0	0	0	0	0	0	0	0
CG8851	0	0.0011229	0	0.000179233	0	0	0	0.000476586	0.000703138	0.000393829	0.000142548	0	0	0	0	0.00141207	0
Sr-CIV	0.000760098	0.0007194	0.000338403	0.00196635	0	0	0.00271646	0	0	0.00140302	0	0.00535057	0.0015978	0	0	0	0
CG8852	0.000497317	0	0	0	0	0	0	0	0	0	0.000504222	0.00388746	0	0	0	0	0
Spindly	0.196272	0.23809	0.1623	0.17705	0.241446	0.170901	0.165431	0.0569919	0.0473613	0.036324	0.0287469	0.0688163	0.0660981	0.0513	0.0297933	0.0413942	0
sob	0.00151642	0	0.00084067	0.000756083	0	0	0	0	0.00052481	0.000723205	0.000418016	0	0.000643987	0	0	0.00112694	0
odd	0.00468856	0.00550965	0.00591957	0.00346349	0	0	0	0.00151575	0.00199239	0.00261779	0.000798766	0.000837896	0.0029046	0	0	0.00193991	0
Dot	0.031867	0.0261338	0.027635	0.0240165	0.0134406	0.0411526	0.0231547	0.0191325	0.00975502	0.00900727	0.00619436	0.0214474	0.0232064	0.0369159	0.0314862	0.0130336	0.0214604
CG15418	0.00107512	0.00175601	0.00148775	0.000448286	0	0	0.00366972	0.00112279	0.000433602	0.00131117	0.000132733	0	0	0.0017076	0	0.00120647	0
for	0.671009	0.708427	0.595945	0.770579	0.797244	0.651881	0.524089	0.704576	0.578756	0.605157	0.434884	0.702822	0.512043	0.705041	0.517233	0.689986	0.228324
CG3513	0.000830381	0.00016172	0.00300238	0.00135013	0	0.00320329	0	0.00165092	0	0.000706193	0	0.00220394	0	0	0	0	0
CR43364	0.0172117	0.0196968	0.0264668	0.0243577	0.0395707	0.0204272	0.0414766	0.0201944	0.00604412	0.000435705	0	0.0183365	0.000999453	0.00381228	0	0	0
CG43165	0.0121177	0.019327	0.027628	0.0245782	0.0179736	0.0183432	0.00862013	0.0304634	0.014606	0.00507576	0.00157022	0.016203	0.00217869	0.0102829	0.00851944	0.00100076	0
CG16713	0.00859435	0.0142935	0.00915954	0.0160667	0.0153355	0.0193016	0.0162891	0.0195365	0.00194256	0.000965336	0	0.0170795	0.0011421	0.011544	0	0	0
IM33	0.00536026	0.00597427	0.00690588	0.0114735	0.00973591	0.0051165	0	0.00242081	0.00144913	0.000183344	0	0.00655343	0	0	0.00449518	0	0
CG3604	0.00103516	0.000405959	0.000368615	0.0018521	0	0.00398039	0	0.00100423	0	0.000368321	0	0	0	0	0	0	0
CG31778	0.00242396	0	0.00162561	0.00120702	0	0	0	0.00182534	0.00293707	0.000825099	0.00259278	0	0.00163329	0	0	0.000956756	0
CG31777	0.00423529	0.012432	0.0130888	0.00643883	0.0119666	0.00614305	0.0134983	0.00741434	0.0128191	0.00504153	0.0101773	0	0.00726303	0	0.0052745	0.00825529	0
cutlet	0.0247635	0.0777116	0.0803655	0.0282463	0.0693376	0.0408576	0.0317952	0.0158891	0.0757644	0.0212409	0.0622064	0.0124351	0.0511605	0.0157923	0.0552757	0.0224999	0.0830285
CG31955	0.109561	0.13404	0.19642	0.11887	0.0896185	0.104975	0.170682	0.0898831	0.118305	0.072915	0.0752512	0.0803908	0.0452785	0.112443	0.0843833	0.0709785	0.0401412
CG2818	0.145109	0.175574	0.14609	0.139835	0.126883	0.14418	0.132671	0.146741	0.136429	0.125528	0.164566	0.128821	0.163319	0.0963482	0.136936	0.0953891	0.131367
Shaw	0.00140904	0.00356648	0	0.00223348	0	0	0	0.00474318	0.00268091	0.00204753	0.00253956	0.00305627	0.00155903	0	0	0.0019753	0.006508
CG10019	0.00554896	0.00635773	0.000525163	0.00289168	0	0.00378505	0.00256763	0.000219221	0	0.000328872	0.000569394	0	0	0	0	0	0
CG43707	0	0	0	0	0	0	0	0	0	0	0	0	0	0	0	0	0
CR43704	0.000538719	0.000427526	0.000564448	0	0	0.00404177	0	0.000315565	0	0.000752655	0	0	0.000218539	0	0	0	0
bowl	0.440244	0.450614	0.414335	0.431153	0.329363	0.400028	0.298224	0.279195	0.100984	0.0961801	0.0956814	0.264737	0.124944	0.251376	0.047	0.177094	0.184673
bark	0.00426694	0.00165863	0.00120312	0.00438813	0.00730281	0.00798586	0.00298041	0.0158627	0.0270888	0.0334965	0.0345915	0.0370355	0.0782081	0.0311382	0.0128607	0.0426475	0.0304441
Reph	0.314521	0.421	0.276206	0.160013	0.127217	0.143635	0.135342	0.0992198	0.090665	0.12313	0.206696	0.128282	0.181388	0.0984191	0.0787041	0.202994	0.228049
CG3407	0.0500223	0.0283071	0.0396098	0.0384075	0.0200274	0.0381285	0.0269139	0.0404973	0.0424166	0.0359993	0.0330386	0.0328136	0.0418935	0.0204087	0.0190908	0.0255422	0.0494102
slp1	0.00219562	0.00331313	0.00288715	0.00135914	0	0	0	0.00101562	0.000392106	0	0.00122392	0.00244491	0.000935575	0.00654281	0	0	0
CR44078	0.00162066	0.00226049	0.00306939	0.000922903	0.00120241	0.00506048	0.0015362	0.00128707	0.00324058	0.000671539	0	0.00245623	0.000809704	0	0.010575	0.00271072	0
CG3964	0.0311647	0.0438397	0.0377204	0.0231018	0.0375264	0.0342736	0.0379866	0.026541	0.0385629	0.0195164	0.0154347	0.0346993	0.0307823	0.0463806	0.0221219	0.0213532	0
Cep97	0.0673824	0.0922244	0.0870169	0.0654068	0.0946698	0.0753826	0.0605012	0.0525411	0.0400951	0.02452	0.0317659	0.0594832	0.0306248	0.059138	0.0464084	0.0330342	0
CG31957	0.214987	0.250068	0.284729	0.237168	0.294652	0.261532	0.427869	0.251443	0.378696	0.259182	0.339796	0.259812	0.236752	0.324314	0.453074	0.311255	0.287184
capu	0.071301	0.0799786	0.0617722	0.0888082	0.0737899	0.058023	0.0617945	0.0780594	0.0570332	0.0660223	0.0530702	0.0696122	0.0975813	0.073224	0.0301462	0.0820067	0.0339225
CG15422	0	0	0	0.00115291	0	0	0	0.000569565	0	0	0	0	0	0	0	0	0
ed	2.15937	2.21973	2.47269	2.75501	2.66467	2.73743	1.6753	3.06953	2.18936	1.58188	0.750039	2.95501	2.31063	2.38998	1.0862	1.46224	0.305216
CR44984	0	0	0.00174791	0.00183236	0.00518355	0.00144491	0.00302687	0.00314102	0.00241367	0.000754955	0	0.00279238	0	0	0	0	0
Sr-CI	0.00148088	0.00275635	0.00825498	0.00580727	0	0.00672225	0	0.005716	0.00484226	0.00275496	0.000840432	0.00274529	0.00533595	0	0	0.00104929	0
CR45791	0	0.000792521	0.00086392	0.000281991	0	0.0147225	0	0	0	0.000325458	0.000583351	0	0.000589218	0.00311357	0	0	0
CR44057	0.000850338	0	0.00111471	0	0	0	0	0.000315247	0	0	0	0	0.00080831	0	0	0.00233277	0
TBCC	0.181098	0.191862	0.192512	0.184189	0.139366	0.19168	0.238807	0.211181	0.188461	0.185848	0.202478	0.22275	0.217866	0.204772	0.178757	0.174457	0.174142
lectin-24Db	0.00162518	0.000598571	0.00237965	0.00497109	0.0142676	0	0	0.00800115	0.00333604	0.00344663	0.00151358	0.00962087	0.00620149	0.00765417	0.00404907	0.000315898	0
CG3714	0.345752	0.389251	0.377435	0.625034	0.517206	0.545121	0.511631	0.641003	0.574466	0.41336	0.354158	0.616265	0.664393	0.77635	0.448438	0.432521	0.467782
ft	0.00761759	0.00982101	0.00928386	0.010264	0.0181949	0.0195988	0.00237967	0.00914039	0.00342169	0.00351585	0.00139509	0.00522102	0.00490258	0.00334565	0.0064648	0.00536718	0
CG3702	0.976109	0.981453	0.990457	1.01259	0.993939	1.20688	1.15539	1.08457	1.18621	1.2089	1.19249	0.999102	1.1262	1.13322	1.47027	1.07021	1.63411
RpL40	38.7403	37.4529	38.2622	38.6776	39.5685	39.3339	33.6637	39.1126	39.9154	40.531	41.0432	40.5223	40.5426	36.8195	35.2094	40.4085	34.5861
CR44608	0.0111016	0.013141	0.0158751	0.0164839	0.00706117	0.0114716	0.00776444	0.0096616	0.0187868	0.00804006	0.00460477	0.00909464	0.0153345	0.00964988	0	0.0075846	0.0300524
CR44058	0	0	0	0.000471906	0	0	0	0.0017243	0	0.000536013	0.000825898	0	0	0	0	0.00231738	0
Art2	0.00142184	0.000831235	0.00180696	0.000686235	0	0	0	0.00129553	0	0.00149117	0	0	0	0.00505196	0	0.00124111	0
tutl	0.702432	0.808162	0.696236	0.466429	0.285771	0.584191	0.343636	0.207221	0.0785189	0.0214147	0.00716791	0.233859	0.0236129	0.140412	0.0260399	0.0723159	0
bdl	0.407132	0.458001	0.434969	0.254683	0.0720356	0.134556	0.333527	0.115307	0.0267458	0.00634852	0.00422373	0.0154883	0.00143085	0.0699661	0	0.00576319	0.0154945
Atet	0.130547	0.137137	0.171648	0.133871	0.197823	0.118138	0.083032	0.23049	0.284765	0.248726	0.375433	0.321833	0.411945	0.160432	0.224467	0.251642	0.126346
Traf4	0.14852	0.124808	0.142234	0.187272	0.0834014	0.160872	0.0658994	0.214745	0.143364	0.141927	0.0782244	0.153329	0.112025	0.247224	0.0595484	0.223317	0.0516251
CG17612	0.0668615	0.0542787	0.0378734	0.0563911	0.0557968	0.0358143	0.0606125	0.0303301	0.0376049	0.0337478	0.0237073	0.0369841	0.0340194	0.0303031	0.0465256	0.0326762	0.0256142
Vps53	0.0597545	0.0522144	0.0486656	0.0668732	0.0428997	0.0659818	0.047423	0.0496915	0.0484994	0.0478968	0.0457999	0.0213142	0.057577	0.0594367	0.0233235	0.0457522	0.0714895
Psf2	0.217103	0.356527	0.256428	0.253399	0.347418	0.265886	0.395354	0.183579	0.239963	0.166013	0.184931	0.192125	0.211512	0.186748	0.225632	0.157478	0.227841
Tps1	0.000842947	0	0	0	0	0	0	0.000343498	0.00169415	0.000188332	0	0	0	0	0	0	0
CG3652	0.594001	0.610524	0.488641	0.571855	0.493313	0.536712	0.791342	0.478473	0.535711	0.605424	0.6172	0.539935	0.663995	0.683557	0.784013	0.599872	1.05653
l(2)k05819	0.216135	0.219507	0.173819	0.197851	0.164162	0.21152	0.193339	0.167608	0.168809	0.174219	0.152728	0.180736	0.193909	0.15548	0.149083	0.137373	0.0928159
CG33003	0.000699773	0.00101311	0	0.000560627	0	0	0	0.000776347	0.000972008	0.000545662	0.000717513	0	0	0	0	0.00234828	0
Dim1	0.628639	0.689126	0.630103	0.538682	0.465016	0.491933	0.614417	0.483879	0.468711	0.441844	0.443137	0.48326	0.474005	0.458142	0.44089	0.457267	0.377089
CG15431	0.000685004	0.000578002	0.000982481	0.000951756	0	0.00277893	0	0	0.00060691	9.41485e-05	0.000412451	0	0.00260768	0	0	0.00243686	0
Sfp24F	0	0	0	0	0	0	0	0	0.00130544	0	0	0	0	0	0	0	0
CG15432	0.457426	0.474721	0.495461	0.374495	0.368125	0.322182	0.41268	0.384029	0.310571	0.232621	0.202606	0.416128	0.263225	0.426218	0.238218	0.246598	0.264746
morgue	0.131442	0.138157	0.105187	0.118464	0.107329	0.126533	0.115992	0.101693	0.110248	0.118212	0.12436	0.118361	0.135676	0.0806378	0.110645	0.11884	0.0846508
Elp3	0.165183	0.178856	0.16658	0.202456	0.256719	0.256164	0.281875	0.210942	0.19712	0.229841	0.248611	0.227101	0.19826	0.267866	0.32174	0.218339	0.1191
MFS18	0.063884	0.0930269	0.0742075	0.086849	0.0462543	0.123882	0.0804564	0.0628892	0.0967094	0.0848248	0.127579	0.073804	0.097524	0.0694165	0.11918	0.116031	0.189993
CG15439	0.0615306	0.0549887	0.0450059	0.0623468	0.0344782	0.0795558	0.0215864	0.0477586	0.0568487	0.0398441	0.0474377	0.0319079	0.0561964	0.0211373	0.02912	0.0489081	0.0427523
CG15440	0.266706	0.277833	0.286946	0.276682	0.270192	0.276338	0.349674	0.228233	0.216257	0.22291	0.203809	0.229706	0.177894	0.294722	0.352795	0.230227	0.189027
ND-B8	0	0	0	0	0.00715791	0	0	0.000737172	0	0.000583249	0	0.00118901	0	0.00108628	0	0	0
Gs1l	1.32341	1.38642	1.48726	1.38891	1.32449	1.35737	1.93697	1.15367	1.27274	1.2793	1.0815	1.03977	0.964765	1.32789	1.78118	1.20363	0.898796
RpL27A	78.8449	78.2457	78.2859	81.0452	82.8789	80.5249	73.659	84.1109	85.4389	86.2158	86.948	82.6716	82.9935	80.6912	78.3183	87.1565	72.8396
mRpL27	1.82391	1.90307	1.85644	1.85188	1.87464	1.9423	2.04481	1.83582	1.75229	1.78531	1.70038	1.81751	1.7461	1.9372	1.93135	1.63863	1.11022
CG15435	0.0176318	0.016988	0.0154842	0.0162265	0.00472672	0.0115937	0.0285022	0.0157855	0.0158292	0.019701	0.0153503	0.00917198	0.0116291	0.0101166	0.00986605	0.0180799	0.0186217
CG15443	0.141006	0.18175	0.158201	0.119975	0.142791	0.160966	0.151846	0.110784	0.124863	0.108661	0.129342	0.133738	0.135682	0.118817	0.175286	0.143331	0.123919
CG15436	0.033688	0.0482476	0.0453526	0.0294693	0.0543458	0.0667118	0.0789645	0.0397042	0.0380851	0.0336357	0.044734	0.0396651	0.030086	0.0534873	0.0708517	0.0541995	0.0240583
FIG4	0.0165466	0.0185799	0.023056	0.022383	0.0140051	0.0270605	0.0102045	0.0131173	0.0195526	0.0237997	0.0296013	0.0230587	0.021122	0.0280582	0.0189835	0.0111649	0.0478468
dpy	0	0.00110556	0.000500347	0.00138572	0	0	0	0.000595562	0	0.000364368	0.000505138	0	0	0	0	0	0
HP6	0.0023993	0.00118285	0.00135368	0.000556161	0.00757765	0.00113248	0	0.000850699	0.000485773	0.00120277	0.00177416	0	0.000969555	0	0	0	0
CG3251	0.000693066	0	0	0.000554194	0	0	0	0	0.000911585	0	0	0	0.000598915	0	0	0	0
Taf12L	0.0101957	0.00132373	0.00702369	0.00669703	0.003752	0.0104828	0.00954045	0.0131704	0.010877	0.00854177	0.00904045	0.0055303	0.0144252	0.0140706	0.0177167	0.00208601	0
CG3294	0.0989709	0.104898	0.107798	0.0808559	0.0481546	0.0867951	0.0933469	0.0553634	0.0643497	0.0608212	0.0531668	0.0730305	0.0700324	0.0600627	0.0475939	0.0442989	0.0305362
Clect27	0.00155196	0	0.00068134	0.0003679	0	0	0	0.000509709	0	0	0.00131512	0	0.000783889	0	0	0.0044564	0
CG15629	0.0692756	0.102875	0.060035	0.131594	0.146194	0.164999	0.120627	0.0411124	0.0171532	0.00273853	0.000930872	0.233081	0.0182098	0.151619	0.0193475	0.0695712	0.0202808
CG3225	0.00664375	0.0096298	0.00224995	0.00465767	0.00510858	0.00439529	0.00587311	0.0036858	0.00299189	0.005298	0.00458213	0	0.00195852	0.00464455	0.0120803	0.00444358	0
CG15628	0.00165002	0.00312811	0.00381828	0.00156938	0	0	0.00219218	0.00138743	0.00148793	0.00209344	0.00041104	0	0.00171561	0.0017076	0	0.00104214	0
Fnta	0.672587	0.786439	0.749157	0.672403	0.909721	0.637125	0.930242	0.617531	0.691689	0.65105	0.619489	0.641643	0.698315	0.782445	0.77398	0.6206	0.447643
Ir25a	0.00512877	0.00154126	0.00135505	0.00208833	0	0.00634918	0.00259879	0.00231873	0.000789995	0.00201926	0.0021533	0.00198319	0.00249827	0	0	0	0
tank	0.147029	0.170675	0.140904	0.119417	0.165876	0.122711	0.10198	0.0989739	0.120679	0.082188	0.11179	0.0931043	0.120242	0.117324	0.135913	0.114361	0.109257
CG12194	0	0.000826943	0	0.000846987	0	0.00144589	0	0.000630868	0.00166848	0.000870016	0.000896792	0.00184856	0.00135988	0	0	0.00127617	0
mxt	0.174063	0.210027	0.167967	0.18586	0.205138	0.170911	0.162769	0.197718	0.207316	0.177359	0.21601	0.233779	0.254243	0.224984	0.15212	0.166952	0.391026
CG11927	0.136357	0.13204	0.107535	0.109958	0.0951118	0.147625	0.17814	0.090878	0.088652	0.0755782	0.0914606	0.111545	0.109112	0.131136	0.16586	0.0861635	0.0409602
mRpS2	0.681053	0.78883	0.811356	0.87057	1.01205	0.892317	1.0044	1.00107	1.20499	1.2481	1.28416	0.900857	0.963627	1.25181	1.54619	1.06045	0.73372
Mon1	0.11069	0.116879	0.10277	0.0926648	0.132216	0.0850426	0.177635	0.0932202	0.0972899	0.0964087	0.106539	0.0945192	0.104965	0.14613	0.146622	0.0989747	0.183461
smog	0	0.000337899	0.00066025	0.00174543	0.00272681	0.00842914	0	0.00224451	0.00305824	0.00142817	0.000915324	0.00752766	0.00103337	0	0	0	0
Cf2	0.115391	0.0938119	0.0846684	0.0995168	0.0602138	0.078745	0.0755414	0.070842	0.081742	0.0776463	0.0836341	0.0678082	0.0715189	0.0407944	0.0242823	0.0847746	0.0999356
CG3008	0.333763	0.295145	0.249285	0.291115	0.264185	0.272981	0.349276	0.242156	0.224702	0.267717	0.282777	0.190739	0.291854	0.283259	0.418149	0.287891	0.389846
CG15625	0.00115528	0.00169393	0.000581975	0.00455457	0	0.00862946	0.00500511	0.00479881	0.00561545	0.00543756	0.00277761	0.00194804	0.00255701	0	0.00313971	0.00476407	0
CR45716	0.00160579	0.00442788	0.0014921	0.00451834	0	0.00706414	0	0.00341767	0.00287099	0.00354785	0.00265157	0.00184856	0.000633967	0.00604552	0	0.00104929	0
CG3036	0.0841375	0.113696	0.204544	0.483203	0.214344	0.219492	0.143131	0.62066	0.495199	0.630787	0.438194	0.219316	0.257501	0.380499	0.253954	0.421619	0.501707
CG2837	0.110545	0.202963	0.074097	0.0137836	0.00743633	0.00947133	0.0472015	0.00641356	0.0129981	0.00895526	0.0011499	0.00336949	0.0214517	0.00614847	0.00535503	0	0
hoe1	0.0125321	0.00565291	0.0118331	0.0315005	0.0214168	0.0363503	0.0155064	0.0434363	0.0594305	0.0878405	0.162579	0.0307151	0.102739	0.0253166	0.100518	0.126819	0.216889
hoe2	0	0	0	0	0	0	0	0.000980006	0	0.000201822	0	0	0	0	0	0	0
CG14044	0.00033996	0	0	0	0	0	0	0	0.000513139	0.000509417	0.000965314	0	0.000682805	0	0	0.00158128	0
mRpL24	1.06536	1.08548	1.13117	1.096	1.17001	1.04954	1.25958	1.21779	1.29663	1.31778	1.34275	1.26636	1.34273	1.35187	1.62442	1.14712	0.934595
betaggt-I	0.192331	0.186735	0.153258	0.169616	0.172026	0.162433	0.15375	0.156139	0.17602	0.182238	0.153332	0.167494	0.230776	0.175298	0.116784	0.17232	0.136796
jet	0.032486	0.0359772	0.0278106	0.0196605	0.0118588	0.0257104	0.0182028	0.0227412	0.0181685	0.0150897	0.023214	0.0288502	0.0302315	0.0492855	0.0269841	0.0308242	0.00907585
Jon25Biii	0	0	0	0	0	0	0	0	0	0	0	0	0	0	0	0	0
Jon25Bi	0.0012014	0.000543679	0.00221517	0.000380657	0	0	0	0.00021296	0	0	0	0	0.000851479	0	0	0	0
Marcal1	0.0693572	0.0996957	0.0988703	0.0568534	0.0588758	0.0423183	0.098654	0.0483261	0.0797992	0.0418766	0.0618311	0.0553519	0.0427618	0.047322	0.0757136	0.0437576	0.0366632
CG34124	0.000768244	0	0	8.79168e-05	0	0	0	0	0.000905776	0	0	0.00245349	0	0	0	0	0
CR43824	0	0.0010404	0.000481187	0.000462596	0	0.00278493	0	0.0015022	0	0.000646566	0.000681678	0	0.0012631	0.00533365	0	0	0
CG34125	0.627186	0.775794	0.687232	0.550256	0.517585	0.680891	0.936578	0.438484	0.465408	0.419092	0.496246	0.535033	0.656421	0.462002	0.369997	0.388286	0.782767
eIF3i	5.8369	5.80903	6.05208	6.0735	6.19384	6.1615	6.81653	6.44074	6.32791	6.3446	6.14996	6.3329	5.83155	6.5278	7.07513	6.0699	4.74675
Scox	1.08249	1.26629	1.16103	1.17532	1.41676	1.18101	1.4339	1.13294	1.25333	1.29253	1.41567	1.00894	1.19846	1.10594	1.6925	1.1986	0.79164
CG3756	0.193259	0.187281	0.188059	0.235263	0.206658	0.226436	0.412341	0.218827	0.228119	0.261233	0.276894	0.212567	0.194216	0.369614	0.633771	0.299936	0.13384
l(2)05714	0.530923	0.233187	0.249312	0.396984	0.186678	0.349294	0.412323	0.128256	0.232195	0.424942	0.195461	0.128096	0.338538	0.184143	0.48251	0.305766	0.195367
CG14043	0.182797	0.172187	0.166146	0.1741	0.175496	0.186788	0.304606	0.122304	0.218193	0.222837	0.257695	0.160716	0.262928	0.16778	0.361449	0.192101	0.180661
mRpL28	1.22003	1.23965	1.29242	1.28884	1.44466	1.31251	1.62911	1.34421	1.4284	1.58539	1.69943	1.38511	1.6071	1.47632	1.65031	1.3306	1.35739
Gmd	0.23217	0.239822	0.234315	0.209818	0.189016	0.209671	0.212135	0.153306	0.149358	0.165626	0.173561	0.150429	0.189802	0.154887	0.166725	0.15643	0.136315
CG3792	0.520617	0.592564	0.593665	0.528084	0.639112	0.540374	0.67066	0.50387	0.567343	0.487696	0.513774	0.589789	0.567438	0.560672	0.565183	0.513648	0.736187
CG8891	0.996243	1.19681	1.37142	0.995432	1.16371	1.03431	1.39974	1.04701	1.31935	1.4023	1.38323	1.00278	1.18172	1.166	1.82821	1.21091	0.679657
CG8892	0.328528	0.349227	0.3638	0.319736	0.339913	0.286865	0.417245	0.276385	0.280896	0.307728	0.260139	0.283929	0.273089	0.350433	0.396608	0.282756	0.45016
CG34126	0.11539	0.14935	0.114375	0.12014	0.0781995	0.100439	0.0888846	0.109569	0.0980041	0.0925774	0.0831431	0.0975347	0.121439	0.11052	0.0698137	0.10202	0.0315641
Rtnl1	0.844546	0.902131	1.09224	0.916128	0.91995	0.715648	1.06869	0.924152	0.910534	1.15177	3.7205	0.887315	1.48706	0.814091	1.47949	2.93974	16.9541
CG3887	1.99369	1.80397	1.81377	1.7301	1.59792	1.70055	2.04353	1.64398	1.67284	1.76293	1.619	1.66534	1.76748	1.75349	1.98164	1.86527	2.00214
vkg	5.11702	4.75438	4.2443	4.41329	4.1347	5.54644	3.91716	5.41768	7.00617	8.52583	8.86468	6.06184	9.10887	4.44569	7.78199	4.38202	1.52246
Col4a1	13.0709	12.3246	11.2848	11.7845	11.0819	15.7494	8.60419	16.1318	22.2635	26.4347	24.426	18.8233	26.8284	12.1578	19.0707	13.955	0.795082
CG31650	0.191859	0.214218	0.163386	0.166572	0.22419	0.156956	0.197372	0.135194	0.0932879	0.0890855	0.0869756	0.179664	0.154708	0.122178	0.0978225	0.0917488	0.227856
CG9121	0.00394888	0.00505474	0.00344189	0.00498775	0	0	0	0.00294229	0.0038719	0.00454513	0.00179039	0.00854993	0.00212212	0.00139433	0	0.00596498	0
eIF3h	3.07688	2.82117	2.91943	2.89139	2.6222	3.02773	3.15705	2.99623	3.07393	3.11489	3.04886	2.9961	2.93762	3.12907	3.4306	3.27844	3.54747
senju	0.076659	0.0613579	0.0542132	0.0788892	0.0463088	0.0855834	0.0965446	0.0616344	0.0672677	0.0778254	0.0794723	0.05159	0.100876	0.0574472	0.166265	0.0718212	0.156408
CG14036	0.0586905	0.0738677	0.0745405	0.0416867	0.0593103	0.0650464	0.054616	0.0383844	0.0218259	0.0191897	0.0127125	0.0266988	0.0184465	0.0328545	0.0177669	0.018019	0.0234165
His3.3A	9.66424	8.06579	8.23774	8.47805	7.81515	7.5924	8.73396	4.96056	4.93137	6.94357	5.23243	4.89529	7.23832	5.2992	6.93261	5.96277	4.43421
CG31918	0.262516	0.269265	0.21507	0.165783	0.219047	0.527431	0.220362	0.144691	0.114654	0.121543	0.0949857	0.292267	0.172195	0.153358	0.120551	0.0969377	0.0854994
Rpn11	2.86934	2.66372	2.89065	2.89571	2.75012	3.08564	4.55919	2.55659	2.85972	2.92407	2.4493	2.9197	3.22753	3.24504	4.06636	2.47394	3.1919
CR45291	0.0310731	0.0291724	0.0377086	0.0568623	0.0483201	0.0535595	0.0400947	0.0710649	0.0605486	0.0520097	0.0253334	0.073388	0.0733523	0.0488815	0.0124975	0.0132166	0
qtc	0.882662	1.25807	0.892472	1.67698	2.45071	2.80336	1.67447	1.90195	1.59361	0.832125	0.433583	3.50495	2.9352	1.66095	0.885514	0.473648	0.282011
CR43820	0.00231974	0.00306882	0.00247878	0.0062993	0.00412848	0.00699506	0.00301165	0.00616194	0.0125153	0.00732573	0.00122693	0.00940034	0.0068949	0.00795809	0	0.00364953	0.0167248
CR45305	0	0	0	0	0	0.00247048	0	0	0	0	0	0	0.000553714	0	0	0	0
RpL37A	27.5983	27.0848	26.0967	26.9287	27.8661	27.256	23.2947	25.4701	26.0466	28.0146	28.5729	27.089	26.5781	24.3288	24.408	27.1567	28.8179
pgant5	0.32436	0.327978	0.322886	0.248273	0.278698	0.23944	0.219785	0.236875	0.216887	0.206441	0.242177	0.280921	0.206422	0.223567	0.172366	0.213269	0.310273
CG5828	0.0763465	0.0864551	0.0836784	0.077498	0.0620685	0.0923306	0.0728596	0.0645989	0.0784351	0.0737728	0.0833791	0.0592015	0.0813789	0.0336887	0.125487	0.0856742	0.103331
CG4230	0.150618	0.143881	0.126516	0.122247	0.134472	0.14544	0.171121	0.13715	0.115119	0.121712	0.0917592	0.134578	0.141451	0.146542	0.105326	0.105137	0.100428
ND-13A	2.0242	2.0717	2.13217	2.08259	2.08123	2.00708	2.17152	2.27222	2.41523	2.58238	2.75547	2.19138	2.77387	2.17458	2.31882	2.29303	2.3759
Msp300	2.29143	3.06627	2.75663	2.53256	2.47301	4.16868	1.69901	3.5291	3.36108	2.66712	3.35916	4.62739	3.64564	2.67302	1.87819	3.37311	3.07693
Cyp28d2	0.0054829	0.0109412	0.00262938	0.00630679	0	0.0181548	0.0142917	0.010363	0.00784267	0.00498953	0.0111517	0.00889852	0.0126633	0.0108054	0.00939374	0.0110709	0.0143629
Cyp28d1	0.000959138	0.000755187	0.000428696	0.00104379	0	0	0	0.000602642	0	0	0.00151509	0	0.00316822	0.00232874	0	0	0
TpnC25D	0	0	0.000995855	0.00103936	0	0	0	0.000635316	0	0	0	0	0.000640248	0	0	0	0
tkv	0.436769	0.384249	0.330193	0.18208	0.117312	0.243922	0.209886	0.0649233	0.040441	0.0389607	0.0638513	0.0850698	0.0336913	0.0312062	0.00352441	0.046864	0.284948
CR14033	0.0514271	0.0524573	0.0788302	0.0795449	0.0834429	0.0528827	0.102471	0.115264	0.11272	0.073409	0.0247047	0.0975971	0.0839566	0.0797368	0.0609129	0.038953	0.0274891
Cyp4ac2	0.000765178	0.000213219	0	0.00133213	0	0	0.00358811	0	0	0	0	0	0	0	0	0	0
Cyp4ac3	0	0	0.00156918	0.00097727	0	0	0.00280264	0.00039609	0	0	0	0	0	0	0	0	0
Bsg25D	0.140525	0.13666	0.108466	0.115725	0.049126	0.113384	0.0861866	0.107409	0.0889788	0.0973876	0.11687	0.0970124	0.129148	0.0652679	0.0510916	0.111367	0.12786
Bub1	0.161461	0.12651	0.139844	0.162541	0.0735937	0.131535	0.0648026	0.115626	0.116175	0.113836	0.0985635	0.087746	0.115308	0.0722515	0.0823454	0.1081	0.139494
vri	0.0921899	0.0960267	0.121819	0.108416	0.0724357	0.131988	0.066454	0.122637	0.0799766	0.104759	0.107859	0.154838	0.105564	0.0868742	0.0158892	0.145953	0.169131
CG14024	0.00791644	0.0115302	0.00571156	0.00573699	0	0.0104671	0	0.00529369	0.0069157	0.00471517	0.00506786	0.00515973	0.00183678	0.00929088	0	0.00879813	0
Ncoa6	0.752868	0.588212	0.626352	0.62544	0.464011	0.634876	0.347322	0.551376	0.458951	0.519365	0.423629	0.503588	0.524868	0.441358	0.30284	0.482871	0.386523
CR44985	0.0017828	0.0002598	0.000664776	0.00226117	0	0	0	0.000847566	0	0.000572802	0.000451026	0	0	0	0	0.00305643	0
cype	7.71985	7.70977	8.08805	8.29824	8.39264	7.97149	7.34565	8.74856	8.84591	8.95708	9.224	8.69752	9.76048	8.00787	8.07107	8.16877	8.09254
CG14022	0	0	0	0	0	0	0	0	0	0	0	0	0	0	0	0	0
TotM	0.00360321	0.000983363	0.00532312	0.00409854	0.00110139	0.0150451	0	0.00143567	0.000944403	0.00168099	0.000548458	0.00946019	0.00242486	0.00463271	0	0.00190652	0
CG12512	0.0555527	0.0691539	0.0437439	0.0328694	0.0453387	0.0227068	0.0595665	0.0236272	0.0164097	0.0138443	0.00471229	0.0388697	0.00310609	0.0371748	0.0265064	0.0216881	0
H15	0.0013154	0.000725216	0.00163071	0.00355889	0.0142946	0	0.00893489	0.00463415	0.0196883	0.00767038	0.0215164	0	0.000639404	0.0902466	0.0219768	1.01151	0.138949
mid	0.139475	0.122007	0.165205	0.327078	0.173831	0.0225987	0.243224	0.120754	0.199906	0.254414	0.211252	0.0207047	0.00838513	0.808919	0.422768	2.23865	0.258693
CR45287	0	0.000701778	0	0.000466071	0	0	0.0033538	0.00122201	0.0016535	0.0030569	0.00337987	0.00212833	0	0.00201084	0.0050663	0.0342328	0
CG7382	0.407996	0.411627	0.395408	0.462731	0.34617	0.396342	0.53063	0.438427	0.513438	0.5426	0.485702	0.382685	0.447978	0.482662	0.545348	0.520873	0.374548
cl	2.32738	2.30245	2.34335	2.33493	2.2763	2.35897	2.63396	2.32247	2.33947	2.32469	2.11917	2.47292	2.31169	2.40064	2.53079	2.19848	2.0896
Vps52	0.0687972	0.0627769	0.0571041	0.067579	0.0759624	0.0459591	0.079576	0.054473	0.055822	0.0608704	0.0677787	0.0751355	0.0732098	0.0618235	0.0956854	0.047598	0.0361066
CG6907	0.356024	0.439868	0.394391	0.391861	0.464048	0.397877	0.775335	0.305119	0.297334	0.280827	0.366201	0.314109	0.343728	0.533717	0.697188	0.358311	0.432693
CR44793	0.00427396	0.000656927	0.00301808	0.00171129	0.00929987	0	0	0.000867226	0	0.000292181	0	0.00108342	0.000943054	0	0	0	0
Cap-D3	0.0305595	0.0423631	0.0301957	0.0313552	0	0.0392262	0.0387327	0.0223503	0.0196113	0.0160639	0.0197035	0.011078	0.0240015	0.0211867	0.0287772	0.0208069	0.0363286
CG31648	0.438295	0.551343	0.487905	0.529808	0.563946	0.507844	0.554377	0.398767	0.565051	0.573222	0.551169	0.394223	0.500488	0.364709	0.65588	0.484567	0.306929
CG31915	0.411544	0.470052	0.449649	0.474691	0.393012	0.595843	0.554177	0.381537	0.225681	0.124416	0.115865	0.467029	0.170637	0.345411	0.142345	0.130247	0.0574261
CG7277	0.351162	0.384751	0.275584	0.344356	0.376505	0.32847	0.383122	0.246211	0.231715	0.251768	0.268231	0.216791	0.239399	0.276083	0.342185	0.246872	0.249031
tomb	0.00739058	0.00315391	0.00765508	0.00320042	0.00479519	0.00129071	0.00405508	0.00023188	0.00197069	0.00180901	0.0012789	0.00668171	0.00256142	0	0	0.00115852	0
CG14015	0.00268	0.00427763	0.00292251	0.000943316	0	0	0	0.00192002	0.00241272	0.00143087	0.00242899	0.00544992	0	0	0.00463383	0.00395636	0
Hel25E	5.64054	5.27762	5.34228	5.75929	5.46505	5.3341	5.97434	4.48106	3.94804	4.2053	3.75154	4.51861	4.1165	4.52489	4.54704	3.98376	3.27045
Lam	4.18475	3.13725	3.18917	3.48995	2.36587	3.15415	2.98116	1.84628	1.56494	2.03544	1.07184	1.7312	1.67453	1.65374	1.52183	1.58309	0.819995
Oscillin	0.412312	0.430322	0.452368	0.415181	0.424432	0.445461	0.512978	0.512281	0.480426	0.442674	0.406962	0.55421	0.501017	0.450181	0.612816	0.296418	0.662784
CG18269	0	0.00104889	0	0	0	0	0	0.00079643	0	0.000532183	0	0.00252227	0	0	0	0	0
GluRIIA	0	0	0	0	0	0	0	0	0	0.000201768	0.000405875	0	0	0	0	0	0
GluRIIB	0	0	0	0	0	0	0	0	0.00083341	0.000508063	0	0	0	0	0	0	0
Cyp6a16	0	0	0	0	0	0	0	0	0.000613935	0.000344805	0	0	0	0	0	0.000515382	0
Hsp60C	0.00141862	0.000251465	0.000826343	0	0.00232491	0	0	0	0.00141143	0.000381792	0.00059714	0	0.001593	0.0050959	0	0.00201373	0
CG7236	0	0	0.000557692	0	0	0	0	0	0	0	0	0	0	0	0	0	0
sip1	0.0678107	0.0662186	0.0621481	0.053321	0.062687	0.0451712	0.0367306	0.0376657	0.0322498	0.039438	0.0366872	0.0325556	0.0351396	0.0284375	0.0188523	0.0423864	0.0392431
CG11030	0.447685	0.483382	0.518529	0.447502	0.61712	0.462327	0.423204	0.457311	0.377808	0.395723	0.357632	0.426872	0.315628	0.435782	0.356067	0.378531	0.210534
CG11147	0.00686331	0.00330007	0.00557685	0.00391462	0.00813375	0	0.00628678	0.00212124	0.00191049	0.00330993	0.0035724	0.00252538	0.0100837	0.00514007	0	0.0140436	0.021547
CG11029	0.00227697	0	0.000346559	0.00253235	0	0.00144491	0	0.00162885	0.0028078	0.00116064	0.00182465	0	0.00139153	0	0	0	0
obst-E	0.000821819	0.00387036	0.00425667	0.00411699	0	0.00563298	0	0.00382835	0.00313771	0.00289883	0.00339705	0.0067316	0.00146995	0	0.0023942	0.00272968	0
CG9171	0.112982	0.114733	0.149191	0.097577	0.0750663	0.13149	0.0676659	0.136298	0.0895508	0.0775164	0.064802	0.15595	0.0992727	0.123301	0.0371041	0.0720389	0.0314059
CR31912	0.00198555	0.00257824	0.00152515	0.00302091	0	0.00254036	0	0	0.00193056	0.0013776	0.000174604	0	0.00214997	0	0	0	0
CG14005	0.134734	0.125539	0.0870327	0.114612	0.153469	0.102669	0.1637	0.0643784	0.0809086	0.0792823	0.0732195	0.109374	0.0921842	0.0744524	0.0982003	0.0940393	0.0587446
CG7239	0.110669	0.0940815	0.103263	0.105686	0.0575391	0.11831	0.147468	0.0638729	0.0650512	0.0671122	0.0591637	0.0865421	0.0825109	0.0619009	0.111765	0.0582329	0.0569436
CG11034	0.0132731	0.00687068	0.00613553	0.00673097	0.0182742	0.0112348	0.0134757	0.00564473	0.0102063	0.0155225	0.00925851	0.01385	0.0112047	0.00956211	0.00816376	0.0132404	0
CR44576	0	0.00118331	0.00106436	0.00107697	0	0	0	0	0	0	0.000453768	0.00118901	0.000658823	0	0	0	0
TrissinR	0.000221322	0	0.00343609	0.00137791	0	0	0	0.00215605	0.00250245	0.00384062	0.00263548	0.00139183	0.00172023	0.00327257	0.00609621	0.00101413	0
rau	0.683386	0.637887	0.536707	0.444258	0.228121	0.474246	0.468189	0.307248	0.317383	0.339752	0.219511	0.292568	0.279609	0.293214	0.314937	0.386037	0.107939
CG43185	0.00358832	0.00188872	0.00302212	0.00153775	0	0.00249214	0.0060068	0.000348451	0	0.000329877	0	0	0	0	0	0.00122691	0
CG9029	0.00120063	0.00136295	0.00117869	0	0	0	0	0	0	0.000118738	0.000418105	0	0	0	0	0	0
Acp26Ab	0.00941647	0.00826993	0.013597	0.00912933	0	0.0118064	0.0142837	0.0128168	0.00658513	0.00366174	0.00150382	0.00330568	0.00562436	0.0117683	0	0.00140188	0
Acp26Aa	0.000376697	0.000813751	0.00222862	0.000641733	0	0	0.00641752	0.00330809	0.00205415	0.00295203	0	0.00299428	0.000799958	0.0021957	0	0.00177638	0
bchs	0.0517953	0.0385529	0.0373679	0.0411689	0.0318831	0.0603799	0.0191348	0.0295698	0.021085	0.0208692	0.0233339	0.0454616	0.0235339	0.0239951	0.0146138	0.0276551	0.0327263
Sfp26Ad	0	0	0	0	0	0	0	0	0	0	0	0	0	0	0	0	0
Gpdh	0.274404	0.3402	0.273426	0.278818	0.369835	0.314623	0.423927	0.221637	0.348583	0.316889	0.413976	0.212784	0.355042	0.315887	0.55746	0.37968	0.572642
CR44986	0	0	0	0	0	0.00380452	0	0	0	0.000296244	0.000445761	0	0.00135577	0	0	0	0
CG9044	0.0758136	0.0585231	0.0722806	0.0569613	0.0276008	0.0445057	0.0434343	0.0517785	0.0592762	0.0607322	0.0556163	0.0585849	0.0647077	0.0496901	0.0287641	0.0589722	0.137504
CG13999	0	0	0	0	0	0	0	0	0	0.000329517	0	0	0	0	0	0	0
CG13998	0	0.000803238	0.000993956	0.000970919	0	0	0	0.000989799	0.00122295	0.0021263	0.015902	0	0.00527131	0.00227105	0	0.0210044	0.521357
Vm26Ab	0.206081	0.164208	0.195998	0.156135	0.0824385	0.093053	0.195806	0.15095	0.160255	0.145079	1.8333	0.104435	0.235426	0.195025	0.400108	2.43003	208.679
Vm26Ac	0.000467242	0	0.000448595	0.000323077	0	0.00223329	0	0	0	0	0.00305857	0	0	0	0	0.0161685	0.0955216
Vm26Aa	0.267501	0.148694	0.162739	0.148212	0.0926937	0.0990264	0.151891	0.132917	0.118143	0.087635	0.46538	0.107989	0.0882603	0.127824	0.409551	0.305041	132.756
psd	0.0425352	0.0293457	0.0194855	0.0205015	0.00996103	0.0365522	0.0449285	0.0389795	0.0770555	0.0731652	0.196259	0.0931701	0.303929	0.153787	0.15795	0.450236	4.82445
CG13992	0.0325916	0.0347126	0.0331689	0.0406175	0.06677	0.0685254	0.0440553	0.0918903	0.186801	0.251825	0.827016	0.147671	0.456719	0.198383	0.320387	1.05484	3.82582
Ucp4C	0.0236057	0.0273463	0.0329605	0.036634	0.056482	0.0875589	0.0476687	0.0864294	0.126921	0.11152	0.234854	0.286487	0.377098	0.165711	0.12167	0.288418	0.433418
Ucp4B	0	0.000491913	0	0	0	0	0	0	0.000626527	0.00330802	0.00179265	0.00167707	0.00231022	0.00299403	0.0050663	0.00286174	0.006508
CR43465	0.00847263	0.0160025	0.00825894	0.00923879	0	0.0156771	0.00439225	0.0108828	0.00646483	0.00919399	0.0162026	0.0118381	0.0080229	0.0115136	0.00404907	0.0146526	0.0226115
chic	8.46546	8.03159	8.26209	7.64626	7.83044	8.51384	7.49819	7.25116	6.73685	5.91858	5.50651	8.34589	7.89686	8.69876	6.33714	9.95685	7.96619
eIF4A	22.202	21.1718	21.4076	20.4906	20.8831	20.6204	19.7129	19.7252	19.0276	19.0648	18.3332	20.0992	19.3531	19.4969	18.7543	20.3254	15.1434
ifc	0.42894	0.391867	0.442482	0.406426	0.357478	0.454306	0.35805	0.372576	0.386244	0.33529	0.286049	0.420766	0.407077	0.334064	0.329081	0.282611	0.247429
lid	0.821784	0.67155	0.641971	0.71174	0.471023	0.615332	0.410849	0.53633	0.498744	0.633984	0.537678	0.516446	0.511453	0.497157	0.31036	0.543396	0.582905
Tsp26A	0.0873435	0.1099	0.101054	0.0926565	0.107444	0.117741	0.111119	0.111808	0.0781714	0.0921837	0.118567	0.154854	0.146009	0.0492583	0.0856374	0.0838725	0.114865
Gal	0.00120502	0.00395391	0.00563929	0.005853	0	0.00160271	0	0.00479211	0.00476973	0.00394246	0.00174337	0.00450141	0.00123907	0.00453198	0.0149987	0.00659291	0.006508
CR43866	0.00193517	0.000897713	0.00241165	0.00103616	0	0.00282835	0	0.00109169	0.000913381	0.00150805	0.00362295	0	0.00782648	0	0	0.00278782	0.00983894
CG9098	0.227154	0.206299	0.196698	0.211541	0.135238	0.175262	0.19437	0.14237	0.127091	0.127235	0.0963733	0.140885	0.0877005	0.17266	0.155762	0.127639	0.100703
H2.0	0.000396614	0	0.00089501	0.00178225	0.00331217	0	0	0.000944273	0	0.000202017	0	0.00325428	0.000991151	0	0	0	0.0124641
CG9107	0.794953	0.8772	0.97862	0.93586	1.17953	1.04558	1.15141	0.997312	0.991362	0.990988	1.02582	0.984805	0.750104	1.10727	1.39293	0.95546	0.684558
mtm	0.288568	0.307357	0.274138	0.297456	0.314291	0.294161	0.494565	0.284521	0.265266	0.289786	0.299357	0.341654	0.422241	0.304442	0.372225	0.252745	0.45048
CG9117	0.0630378	0.0627987	0.041568	0.0586648	0.0834607	0.0559266	0.0729477	0.0852138	0.0730212	0.0812638	0.0830768	0.0641632	0.0693541	0.0770858	0.110251	0.0815159	0.0978242
CG31643	0.0452941	0.0529359	0.0398209	0.0575582	0.0238593	0.0712363	0.0512025	0.0543812	0.0675709	0.048221	0.0509016	0.0555376	0.058435	0.0721616	0.0684943	0.0648081	0.0256825
ade2	0.3493	0.392713	0.29518	0.459909	0.521649	0.501219	0.443122	0.436068	0.417673	0.481033	0.43497	0.47454	0.412119	0.436595	0.404369	0.372892	0.278157
slmo	0.0694944	0.0542419	0.0657301	0.0654048	0.118671	0.0782568	0.0549866	0.078681	0.068517	0.0883656	0.0991707	0.0801651	0.0894638	0.0503197	0.0566292	0.0595898	0.0544695
CG12393	0.560257	0.612552	0.547388	0.515343	0.519173	0.649527	0.78539	0.415733	0.262421	0.231606	0.203768	0.520999	0.3334	0.398699	0.255813	0.216839	0.261251
CG9135	0.764153	0.573917	0.54552	0.546985	0.469148	0.575886	0.616959	0.23642	0.188887	0.1847	0.139357	0.352423	0.301514	0.312254	0.170712	0.189356	0.172376
CG13995	0.0018116	0.00154883	0.00381768	0.00473065	0	0	0	0.000794723	0.00153263	0.00115808	0	0	0.000658287	0	0	0	0
CG34180	0.00187818	0.00133304	0	0.00078882	0	0	0	0.00108526	0.00128974	0.00683003	0.004485	0.00339317	0.00249665	0.00318936	0	0.00594914	0
ND-51	1.6281	1.63199	1.68137	1.64247	1.51771	1.68284	2.54471	1.652	1.843	2.1043	2.40776	1.6111	2.23421	2.2564	2.95921	1.90382	2.92199
CG13994	0.335087	0.399492	0.348112	0.336335	0.397267	0.343335	0.437929	0.369769	0.409455	0.401379	0.400665	0.377621	0.450852	0.40616	0.518128	0.360208	0.3651
Fbw5	0.0251507	0.0189617	0.0192642	0.0252029	0.00946482	0.0222048	0.0430858	0.019421	0.0241758	0.0248994	0.0274772	0.00798359	0.0196756	0.0141069	0.0306857	0.0215748	0
CG9147	0.129685	0.167638	0.137717	0.139487	0.157222	0.148302	0.185918	0.141559	0.136361	0.107371	0.116749	0.16067	0.123987	0.133122	0.180758	0.118759	0.1039
CG9150	0.00171691	0.00229379	0.000925362	0.000509946	0	0	0	0.00262028	0.000926881	0.00322315	0.0019594	0	0	0	0.00570877	0.00131691	0.00934453
Pfdn1	1.44298	1.45432	1.43236	1.65115	1.56418	1.74167	1.77101	1.58712	1.62091	1.68417	1.57125	1.85861	1.5883	1.69896	1.99684	1.62966	1.33104
CG9154	0.267561	0.391442	0.322245	0.322902	0.374653	0.358351	0.386002	0.34721	0.328025	0.328184	0.325193	0.361182	0.26099	0.422779	0.463741	0.306353	0.253671
Kr-h2	1.18343	1.15483	1.12046	1.07189	1.16235	1.17921	1.36765	1.07689	1.04324	0.933034	0.91204	1.15874	0.960345	1.18546	1.19139	0.976397	1.19907
CR9162	0.00292993	0.00213763	0.00253776	0.00153765	0.00455753	0.00230383	0.00365794	0.00303506	0.00145327	0.00104728	0.00480715	0	0.0052481	0.00326136	0	0.00205737	0
CR44773	0.00309283	0.00270553	0.00775844	0.00156221	0	0	0	0.0099722	0.0111639	0.00710757	0.010971	0.00657918	0.00363383	0.00392707	0	0.0128565	0.0297138
Kr-h1	0.0787802	0.079017	0.0692501	0.0767169	0.065535	0.0831158	0.0697451	0.0751679	0.059586	0.0736648	0.099953	0.0757551	0.0981974	0.0526863	0.0393823	0.0771238	0.157661
CG9175	0.115835	0.102364	0.10187	0.104138	0.0716822	0.0951624	0.125077	0.105358	0.115647	0.118609	0.128361	0.118663	0.133022	0.129469	0.173113	0.136877	0.17478
stai	2.04796	4.49722	2.98041	1.93002	3.17848	1.90745	2.98758	0.989712	0.254775	0.0754986	0.0602697	1.4637	0.26785	1.04905	0.126583	0.227843	0.211405
CG31642	0.00638502	0.0033379	0.0138729	0.0117188	0.00907077	0.0170569	0.0381318	0.024183	0.0386244	0.014979	0.0108042	0.0215755	0.0195433	0.0216009	0.0186063	0.0135378	0
Arpc4	2.25404	2.13983	2.31848	2.15496	2.1493	2.14493	2.36563	2.14067	2.13679	1.95826	1.88823	2.14946	2.53581	2.22886	1.82148	1.59069	1.67296
WDR79	0.176963	0.255713	0.184811	0.160055	0.18866	0.167676	0.226231	0.100391	0.154861	0.108351	0.114367	0.0979382	0.123541	0.103509	0.200959	0.112956	0.0462336
CG13991	0	0.000319059	0	0.000478954	0	0	0	0	0	0.000271575	0	0	0	0	0	0	0
smal	0.00267366	0.00146769	0.00194133	0	0	0	0	0.0024793	0.00311601	0.000689913	0.000898072	0.000837896	0	0	0	0	0
Ddr	0	0.000406937	0.000713882	0	0	0	0	0.000940794	0.000453177	0.000387001	0	0	0	0	0	0.000867047	0
PDZ-GEF	0.283181	0.252745	0.207348	0.208	0.219792	0.287453	0.191738	0.151702	0.126564	0.14645	0.120745	0.173711	0.174395	0.138006	0.119117	0.144365	0.108466
Pez	0.0905413	0.0872527	0.0845235	0.0904878	0.0627983	0.0692958	0.0747688	0.0873207	0.0618085	0.0823488	0.0758747	0.0584255	0.0967421	0.0453468	0.0583362	0.075609	0.0422503
Cpr	0.24675	0.267763	0.2661	0.30892	0.321035	0.344358	0.355005	0.402757	0.521918	0.553862	0.732401	0.384801	0.619863	0.496382	0.800645	0.546724	0.705265
CG9498	0.000776785	0	0.00144766	0.000309624	0	0	0	0.000519629	0	0	0	0	0	0.00310372	0	0	0
CG9505	0.232074	0.317728	0.225358	0.272564	0.241733	0.0393197	0.470864	0.285549	0.269872	0.232213	0.187396	0.0213261	0.0171188	0.434995	0.56989	0.525268	0.10961
slam	0.0503394	0.0593667	0.0424787	0.0520169	0.0451342	0.0112354	0.0306573	0.0357187	0.0346675	0.02553	0.0159123	0.00117516	0	0.0553716	0.0536524	0.0422265	0.011925
DIP-epsilon	0.117285	0.147243	0.0753997	0.0677668	0.0333853	0.00496275	0.0833109	0.0158715	0.00349179	0.00111003	0.000852563	0	0.000889734	0.00809595	0	0.0024407	0
CG13982	0	0	0	0	0	0	0	0	0	0.000357183	0	0	0.000313701	0	0	0	0
Tig	0.00818498	0.00729702	0.0124771	0.00654794	0.00387532	0.00234926	0.00954792	0.00276638	0.00244077	0.00011483	0	0	0	0	0	0.00209611	0
Fic	0.0940992	0.0718863	0.0769635	0.0853018	0.0424442	0.0889888	0.0985371	0.102862	0.082836	0.0920086	0.0780832	0.0662237	0.0959321	0.0800244	0.0480938	0.0677299	0.0776517
CG9527	0.0309609	0.039079	0.0383699	0.0287332	0.0368259	0.0310083	0.0471737	0.0509824	0.0686051	0.0346372	0.0526789	0.0405414	0.0692637	0.0381514	0.0560656	0.0556389	0.0734554
retm	0.0714517	0.0742681	0.104635	0.0803063	0.098901	0.0669972	0.089548	0.0956934	0.113512	0.0669585	0.0847593	0.0877396	0.102854	0.0931738	0.0689143	0.06737	0.0305311
frj	0.146093	0.157379	0.142947	0.133081	0.128578	0.151466	0.112319	0.108483	0.124425	0.121739	0.1185	0.116312	0.126009	0.117866	0.142151	0.123697	0.232726
CG16947	0.0446085	0.0594503	0.0395873	0.0265167	0.0183976	0.0162872	0.0479463	0.00918804	0.00935236	0.00270667	0.00228975	0.0142767	0.00146622	0.0149425	0.00633277	0.00336561	0
CG9531	0.123764	0.173405	0.0812948	0.172268	0.148645	0.132724	0.1952	0.140137	0.165864	0.190216	0.186549	0.143576	0.183899	0.156285	0.232309	0.170055	0.110156
mmy	0.100973	0.0736441	0.0953091	0.0954931	0.0606713	0.0708888	0.090143	0.091865	0.099523	0.103869	0.125526	0.0762091	0.143629	0.0759017	0.0923176	0.131622	0.137343
CG9536	0.0754214	0.0637541	0.0704143	0.0631134	0.0485887	0.087624	0.0993165	0.0697506	0.057225	0.0673142	0.0578688	0.0568544	0.0794837	0.0593248	0.0731515	0.0549832	0.166344
Sec61alpha	2.53691	2.42287	2.60689	2.33317	2.21411	2.40397	3.39396	2.61616	2.76373	2.87726	3.3789	2.516	2.98717	3.27628	3.75106	3.62985	9.44327
CR45463	0.00399164	0.00117136	0.00130835	0.00254053	0.00316944	0.00472721	0.00354242	0.000789062	0.00198799	0.00380305	0.00115886	0	0	0.000585343	0	0.00493894	0
Daxx	0.292301	0.208557	0.200548	0.232215	0.156287	0.209417	0.128308	0.135849	0.153568	0.208527	0.149239	0.100519	0.218997	0.139745	0.111671	0.170165	0.0942778
KFase	0.00974079	0.011077	0.00753133	0.0059316	0.00340331	0.0138942	0.00701442	0.00152382	0.00442965	0.00295956	0.0019235	0.00519382	0.00634203	0.023864	0	0.00372021	0
epsilonCOP	1.53214	1.57641	1.62615	1.43186	1.57665	1.39365	1.69781	1.42987	1.4086	1.45697	1.49292	1.51275	1.60536	1.46975	1.65461	1.55673	2.19467
Phf5a	1.22282	1.15464	1.24593	1.15343	1.19324	1.22519	1.17619	1.03206	1.03241	0.968786	0.801426	1.15027	0.904463	1.08822	0.973363	0.861533	0.882196
CG31638	0.0968959	0.119573	0.107164	0.0918312	0.117732	0.087205	0.0742701	0.0638533	0.0588509	0.0531019	0.051118	0.097294	0.0909098	0.0432632	0.00911138	0.0487987	0.0477064
CG9547	0.524438	0.48141	0.622084	0.525253	0.544473	0.479214	0.776695	0.468739	0.437766	0.374456	0.357817	0.461694	0.42986	0.430434	0.495472	0.334509	0.357254
CG31637	0.123103	0.112613	0.0920862	0.0961355	0.113281	0.124457	0.114572	0.088491	0.0658603	0.0725327	0.0869897	0.0703817	0.102612	0.104645	0.070162	0.109538	0.0278566
eya	2.11192	2.18676	2.16992	1.89741	2.65577	2.39844	2.34064	1.09231	0.489712	0.337215	0.168451	1.56423	0.889119	0.898076	0.169954	0.314795	0.096159
CR44776	0.121772	0.105148	0.190491	0.126043	0.154643	0.250619	0.137769	0.105392	0.0196148	0.00552137	0.0016063	0.178699	0.0519233	0.0795963	0	0.010501	0
IFT52	0.0176275	0.0174203	0.0257478	0.0370264	0.0728533	0.0299855	0.0455606	0.0281021	0.0184057	0.00831338	0.00309802	0.0515455	0.0378671	0.0542842	0.00770877	0.00458112	0
COX5B	9.96493	9.5452	10.4285	10.759	10.8095	10.6485	10.4976	10.9756	11.0642	11.2882	11.5775	10.9421	12.1339	10.4195	10.3925	9.80798	9.39327
CG9596	0.614029	0.539709	0.589467	0.619541	0.582233	0.656807	0.659062	0.622123	0.593675	0.588973	0.477435	0.585011	0.472088	0.708644	0.738314	0.495406	0.227052
Ent2	2.914	2.67531	2.87024	3.0214	3.24895	3.37683	3.46178	2.61675	2.49487	2.53675	2.44529	2.95626	3.38131	2.76872	3.0205	2.54618	2.31565
CG13766	0.0475552	0.0433165	0.0559771	0.0424352	0.0280909	0.0213215	0.0434272	0.0387282	0.0440288	0.0420436	0.0317446	0.0263307	0.046465	0.0370751	0.0453442	0.0347035	0.0570763
CG11050	1.56548	1.37814	1.44665	1.55135	1.28693	1.62677	1.14986	1.46064	1.33188	1.71227	1.23745	1.58511	1.56012	1.07068	0.921428	1.09397	1.13821
DIP-iota	0.000737456	0	0.00125186	0.00230319	0.0127987	0.00185983	0.00251482	0.0100005	0.00278035	0.00790621	0.0296882	0	0.00750607	0.0105908	0.0223444	0.00897256	0.0537468
CR44913	0.00187344	0.00441275	0.00188238	0.00441427	0.00109869	0.00152332	0	0.00175229	0.00279846	0.00327802	0.00324609	0.00212833	0.00371331	0	0	0.00528181	0.0163579
Oatp26F	0	0.000318933	0	0	0	0.00144589	0	0	0.000772479	0.000296535	0	0	0.000437947	0	0	0	0
CG31635	0.410535	0.328858	0.340474	0.302257	0.268467	0.2765	0.205797	0.271807	0.189679	0.215017	0.1601	0.240018	0.201834	0.17225	0.142267	0.223816	0.110132
Tango1	0.352976	0.313346	0.380917	0.34801	0.288315	0.388425	0.236713	0.408275	0.490936	0.485914	0.461526	0.355909	0.523776	0.355673	0.31371	0.488052	0.814988
CG31633	0.0123837	0.0268759	0.0131298	0.0142124	0.0316941	0.0166003	0.0314609	0.0160393	0.0177961	0.0158053	0.028032	0.016142	0.0214176	0.0224979	0.0100336	0.0176219	0.0175503
CG31636	0	0	0	0	0	0	0	0	0	0.000115492	0	0	0.00063633	0	0	0.000923599	0
CG11070	0.154801	0.156922	0.143672	0.171532	0.206666	0.152274	0.112489	0.145849	0.157038	0.181191	0.170503	0.128286	0.17638	0.118947	0.162083	0.129294	0.205921
CG13771	0.0013283	0.000543879	0	0.00035159	0	0	0	0	0	0.000197506	0.00100451	0	0	0	0	0	0
CG34310	0.0358079	0.0458184	0.03736	0.0498936	0.0581013	0.0412059	0.0295145	0.0459834	0.0482808	0.0493673	0.0573516	0.0568762	0.0432731	0.0416005	0.0306894	0.0546498	0.0816794
Galt	1.02184	1.01778	1.24374	1.02344	1.12907	1.07879	1.32162	1.16285	1.11683	1.00582	0.777948	1.00164	0.868779	1.25948	1.22372	0.818773	0.544569
Spn27A	0.462206	0.421193	0.42504	0.197793	0.136175	0.229073	0.357292	0.166241	0.0997817	0.0609384	0.0428761	0.185687	0.0853377	0.16873	0.042081	0.0706185	0.0517153
cort	0.0285263	0.0357003	0.0193258	0.0247667	0.0191014	0.0317338	0.0215233	0.0122366	0.00649373	0.00342281	0.00423352	0.00661569	0.0121437	0.00712614	0	0.00406103	0
Nse1	0.16937	0.209	0.162354	0.185401	0.18231	0.178865	0.260911	0.0887462	0.137528	0.0795901	0.0645381	0.0959482	0.0626618	0.0824659	0.182706	0.0736566	0.0264954
Nhe3	0.091242	0.109551	0.106356	0.110882	0.0941092	0.126834	0.0990156	0.109313	0.0991216	0.116455	0.103233	0.0794877	0.132019	0.0777419	0.0761701	0.117995	0.0428468
CG11327	0	0	0.000919445	0.000497899	0	0	0.00230816	0.000641333	0	0.000800621	0	0	0	0	0.00616162	0	0
Tsp	0.00160982	0.000846664	0	0.000405311	0	0	0	0.000690606	0.000406055	0.000719715	0.000967319	0	0	0	0	0.00115392	0
AkhR	0	0	0	0	0	0	0	0	0.000678136	0	0.00122838	0	0	0	0	0	0
Aatf	0.444322	0.457366	0.496727	0.572195	0.711126	0.69455	0.596551	0.723427	0.682555	0.735811	0.725017	0.735318	0.489526	0.800041	0.963101	0.744797	0.397155
homer	0.121278	0.0896039	0.0992748	0.0874295	0.065273	0.0837866	0.0678082	0.0691801	0.0577501	0.0514001	0.0632338	0.0679242	0.0843554	0.0494074	0.035974	0.0552085	0.0392435
Liprin-alpha	0.157478	0.167305	0.148694	0.129763	0.15433	0.135638	0.0931169	0.120667	0.11273	0.109063	0.111048	0.152039	0.153464	0.0855721	0.055391	0.109632	0.0724019
TTLL3B	0.00188418	0.000803564	0	0.00187685	0	0	0	0.00130532	0.00244309	0.00117053	0	0	0.000700079	0	0	0	0
CG11221	0.00161106	0.00125291	0.000901652	0.0020102	0	0.003644	0	0.00211899	0.000361291	0.00098633	0.00166399	0	0.00328015	0	0	0.00295618	0.006508
CG11322	0	0	0	0	0	0	0	0	0	0	0.000279519	0	0	0	0	0.000795311	0
LUBEL	0.000506203	0.0010115	0.000435319	0.00241167	0	0	0	0.000632198	0.000636781	0.00252638	0.00131465	0	0.00274842	0.00345347	0	0	0
nrv1	0.167911	0.358282	0.357803	0.496984	0.653162	0.347039	0.475049	0.48736	0.395721	0.647784	0.80236	0.370584	0.517137	0.422792	0.593821	0.587861	1.54432
nrv2	0.121225	0.128765	0.162611	0.112729	0.141467	0.197967	0.149943	0.114606	0.117914	0.0865806	0.0700479	0.1174	0.217709	0.108164	0.0891725	0.0969939	0.0551638
CG17375	0	0	0	0	0	0	0	0	0.00042786	0	0	0	0	0	0	0	0
sens-2	0.000954273	0.00311356	0.00122399	0.00105884	0	0.00280593	0	0.00222251	0.000763954	0	0.000407841	0	0	0	0	0	0
Rca1	0.140393	0.115177	0.0891628	0.0907755	0.0341259	0.0931926	0.0997668	0.0479846	0.0351819	0.0375401	0.0266351	0.0486699	0.0502762	0.0462786	0.0223612	0.0317067	0.0273937
l(2)k09022	0.145159	0.170735	0.150222	0.186973	0.176773	0.188195	0.146675	0.182311	0.237917	0.27195	0.323512	0.206126	0.201874	0.233257	0.354025	0.275469	0.196381
Nlg2	0.00111756	0.00175058	0.00144488	0	0	0	0	0.000795624	0.000731909	0.000347483	0.000877421	0	0.00135275	0	0	0.00102139	0
CG13773	0.516487	0.599427	0.68794	0.714876	0.911865	0.74417	1.11272	0.902731	1.04601	0.983929	1.04732	0.926674	0.725611	1.0763	1.55256	0.907424	0.589263
Rat1	0.288707	0.312094	0.31049	0.324632	0.322257	0.289682	0.323771	0.300296	0.347212	0.341557	0.329131	0.289425	0.283879	0.263897	0.299768	0.35659	0.191005
Wee1	0.125635	0.133752	0.0840716	0.107142	0.0861661	0.114608	0.132039	0.0786261	0.0633706	0.0666063	0.049977	0.063805	0.0790099	0.0837511	0.071328	0.0555279	0.0854577
x16	0.803442	0.874517	1.01617	0.836357	0.88108	0.88441	1.0583	0.660497	0.931121	0.841003	0.809401	0.704721	0.805778	0.730037	1.01923	0.791067	0.696155
CG32829	0.0111356	0.0198833	0.0260901	0.0192482	0.00697976	0.0111796	0.0152369	0.0209941	0.0171717	0.012685	0.011953	0.0109603	0.0112182	0.00161699	0.0115753	0.0119086	0.00957524
nop5	3.33354	3.44197	3.32131	4.16235	4.5925	3.96917	4.32741	4.1376	4.02612	4.97052	4.84673	3.94508	3.52526	4.27817	5.28126	4.76535	3.39655
snoRNA:nop5-x16-a	0.000154922	0	0.000945344	0.000838446	0	0	0	0.00089285	0.000879764	0.00116891	0.000409809	0	0.00208009	0	0	0.00108245	0
Hrb27C	9.17746	9.59223	9.40016	8.98265	8.9078	8.9243	7.1762	8.06817	6.90826	7.19963	6.95713	8.08266	7.23637	7.17998	5.64756	7.33332	6.53203
CG43232	0	0	0.000373267	0.00100858	0	0	0	0.000588479	0	0.00111732	0.000797935	0	0	0	0	0	0
CG18304	0.000745189	0.00264318	0.000921782	0.000982882	0	0	0	0	0	0.000711028	0.000430642	0.0018811	0.000907484	0	0	0.0012429	0
Fgop2	0.174249	0.169264	0.153057	0.143613	0.198214	0.156962	0.199418	0.119393	0.117776	0.130454	0.108782	0.113824	0.128756	0.129029	0.122534	0.137617	0.0783291
ihog	0.113966	0.093546	0.0958924	0.0928723	0.0970258	0.0869131	0.102154	0.0622359	0.0551751	0.0330557	0.0377275	0.0788521	0.0466063	0.04451	0.0432014	0.0478242	0.0101042
Gas41	0.189854	0.178046	0.183037	0.164144	0.198356	0.184251	0.23598	0.141028	0.142313	0.142328	0.14128	0.180043	0.139866	0.160954	0.17671	0.134995	0.0887222
SA	0.126516	0.114778	0.183473	0.102679	0.0739914	0.0924798	0.143711	0.047456	0.138151	0.0629662	0.0678737	0.0429733	0.106263	0.065193	0.0908971	0.0644669	0.136189
CG13775	0.0232502	0.0378561	0.0484896	0.0303256	0.0282575	0.0344173	0.0459688	0.0325863	0.0342298	0.0175524	0.0213225	0.0379897	0.0152512	0.0120799	0.0302524	0.0373076	0.0300144
CG3430	0.0398696	0.122358	0.120439	0.040158	0.0944843	0.0476325	0.0866267	0.025193	0.115076	0.0386008	0.0894624	0.0258979	0.0669885	0.0393248	0.0626736	0.0598044	0.0805068
Atac1	0.104064	0.0957789	0.0896526	0.094597	0.0798859	0.075124	0.0922357	0.0905612	0.0856889	0.0887376	0.0729953	0.0796514	0.10514	0.106136	0.104118	0.077649	0.0663337
CG10399	0.164372	0.161237	0.155556	0.191629	0.138675	0.195873	0.194876	0.233884	0.340461	0.433064	0.470472	0.26523	0.393473	0.261831	0.442451	0.37648	0.472987
sip2	0.302624	0.892493	0.272169	0.499669	0.798099	0.399675	0.660144	0.120312	0.0813534	0.0313449	0.0229645	0.133423	0.040814	0.176859	0.0713804	0.0528176	0
Coprox	0.333027	0.37961	0.304963	0.334347	0.313235	0.305542	0.754012	0.222192	0.271099	0.227889	0.230349	0.215299	0.25962	0.368444	0.591898	0.237278	0.25651
smt3	20.1711	18.5272	19.9251	19.3786	19.1565	18.2944	19.3102	15.7481	15.2059	14.6412	11.8341	16.5404	13.7483	16.7642	15.1234	14.9052	8.74219
snRNP-U1-70K	0.626328	0.679544	0.749321	0.70178	0.745973	0.644434	0.862168	0.697904	0.537357	0.515544	0.525614	0.679547	0.511712	0.765225	0.695889	0.543749	0.491745
uif	0	0	0	0.00122464	0	0	0	0.00102705	0	0.000882272	0.000501998	0	0	0	0	0.00366245	0
CG43322	0.00495488	0.00527389	0.00451983	0.00577908	0.0011744	0.00892477	0.0075155	0.0036926	0.00905843	0.00500232	0.0115905	0.00108342	0.00172979	0.00302227	0	0.00612377	0
ade3	0.247311	0.320679	0.340656	0.361759	0.508268	0.354237	0.472408	0.482509	0.552335	0.601251	0.756934	0.426186	0.48286	0.581523	0.726547	0.527818	0.555151
Pcp	0	0.000624455	0	0.00107124	0	0	0	0.000534949	0	0.000411202	0.00153236	0.00251506	0.000747077	0	0	0	0
CG31908	0.30824	0.354478	0.330678	0.34573	0.346634	0.344903	0.378654	0.351675	0.34339	0.340954	0.368754	0.334792	0.397578	0.382463	0.387902	0.316641	0.194121
MME1	0.230401	0.265858	0.299809	0.297424	0.400245	0.324761	0.317813	0.431101	0.426479	0.412024	0.364739	0.413768	0.377183	0.509033	0.540455	0.351398	0.199803
Rab30	0.0806965	0.048934	0.0614817	0.0607283	0.0398741	0.0660008	0.0620616	0.0709578	0.0749278	0.0931282	0.0778566	0.0670028	0.100128	0.0600784	0.0543403	0.0790775	0.0956075
Caper	1.02222	0.929898	0.952785	0.99512	0.660972	0.981273	0.989025	0.776215	0.653703	0.734318	0.663405	0.761565	0.731251	0.73069	0.697407	0.656623	0.534308
milt	0.175379	0.171807	0.193715	0.182282	0.183077	0.235189	0.118149	0.20221	0.175336	0.185591	0.177026	0.182803	0.248471	0.152872	0.114017	0.154899	0.24261
Mnn1	0.325849	0.249291	0.299939	0.282219	0.19845	0.25803	0.15264	0.263342	0.237335	0.218136	0.191586	0.241042	0.188557	0.199804	0.074394	0.236886	0.134408
Sem1	2.16683	2.13077	2.37386	2.0486	1.97731	2.13042	2.0341	1.75123	2.13847	2.05904	1.67052	2.0847	2.19727	1.88332	2.00424	1.78171	1.80312
Nuf2	0.322592	0.517861	0.384407	0.326659	0.398226	0.234424	0.475803	0.149464	0.177446	0.123606	0.0522114	0.145963	0.105166	0.175521	0.1744	0.0734715	0.0397843
Pvf2	0.00430676	0.00223379	0.00516999	0.00281253	0	0.00200484	0.0014421	0.00302478	0.00317645	0.00452193	0.00929156	0.00671834	0.00154021	0	0	0.0040234	0.0109088
Pvf3	0.0011194	0.00273632	0.00124826	0.000317387	0	0	0	0.000506799	0	0	0.000315807	0	0	0	0	0	0
MICU1	0.109229	0.112215	0.118745	0.119047	0.167195	0.143377	0.119867	0.110989	0.104046	0.118366	0.130394	0.0996959	0.147259	0.0931286	0.122754	0.107934	0.113009
CG4496	0.0112995	0.0125918	0.0100111	0.00863627	0	0.000719676	0	0.00914744	0.00366237	0.0110635	0.018663	0.0104204	0.0107534	0.00985064	0	0.0188959	0.0663063
CG4497	0.0278715	0.0511408	0.019213	0.0239706	0.0384727	0.0281458	0.0260041	0.0223758	0.0260275	0.021719	0.0318742	0.0300321	0.0292108	0.0230186	0.0222085	0.0218633	0.0281312
CG4502	0.717449	0.830524	0.702887	0.658556	0.961889	0.866558	0.742896	0.736204	0.762448	0.651257	0.766719	0.83655	1.00718	0.65956	0.617436	0.70834	0.794921
CG13784	0.184944	0.199308	0.207915	0.150137	0.119904	0.122984	0.101275	0.141249	0.122178	0.099326	0.152032	0.15814	0.138592	0.139641	0.0737609	0.151413	0.520921
mEFG1	0.282007	0.323787	0.287951	0.357382	0.446621	0.311335	0.542916	0.377158	0.38127	0.402522	0.49078	0.318702	0.346643	0.426313	0.743573	0.377612	0.197168
CR44989	0	0.000155993	0.000668249	0.000955289	0	0.00294703	0	0	0.000794351	0.000277772	0	0	0	0	0	0	0
Ndae1	0.000665485	0	0	0.00130908	0	0	0.00299607	0	0.000894303	0.00216569	0.00119069	0.00315841	0.00128575	0	0.00544913	0.00112673	0.0273202
CG13786	0	0	0	0.000349629	0	0	0	0	0	0	0	0	0	0	0	0	0
Wnt4	0.0138148	0.0142254	0.0145114	0.00605188	0.00847862	0.0123316	0.00710381	0.00894485	0.0052404	0.00537182	0.013197	0.00280409	0.00506965	0.010603	0.0023942	0.00730985	0.0274891
wg	0	0.000975828	0	0.000696844	0	0	0	0.000990925	0.00180436	0.00102225	0.00107877	0	0	0	0	0.000640604	0
Wnt6	0.00335916	0.00605941	0.00489927	0.00504377	0.00730281	0.010567	0	0.00158183	0.000866746	0.000873086	0.00375171	0.00874286	0.00120735	0.00124227	0	0.0035441	0
CG5149	1.02368	1.00525	0.620521	0.653552	0.570246	0.518706	0.656177	0.683093	0.69619	0.68878	0.547552	0.418114	0.380986	0.682676	0.797748	0.462277	0.300975
gudu	0.00087544	0.000365548	0.00179278	0.00108801	0	0	0	0.0019503	0	0.00235585	0.00115665	0	0	0	0.00536615	0.00231335	0
CG5160	0.00155545	0.00105629	0.000588961	0.00156601	0	0.00217058	0	0.00115542	0.000419031	0.000351415	0	0.00354975	0.00171156	0	0	0	0
CG5171	0.00149109	0.00312928	0.00225807	0.00174804	0.00316944	0.0046378	0.00273073	0.00130145	0	0	0	0.0018811	0	0	0	0	0
CG5177	0.000963537	0.00101549	0.00128408	0	0.00354982	0.00142315	0	0.00130489	0.00142122	0.000375799	0	0.0134934	0.000842217	0.00233075	0	0.00176138	0
CG5181	0.471581	0.474138	0.43087	0.423775	0.418439	0.431195	0.456544	0.380434	0.328201	0.330264	0.293814	0.360545	0.380969	0.431413	0.274132	0.336257	0.244526
CG15818	0	0	0	0	0	0	0	0	0	0	0	0	0	0	0	0	0
chm	0.0967216	0.0825887	0.0981189	0.0826289	0.0454846	0.0769658	0.0831847	0.0618125	0.0551139	0.0667256	0.0619928	0.0542824	0.0762727	0.0519157	0.05003	0.0537469	0.071761
CR43857	0.0127694	0.0244562	0.00577337	0.0146917	0.0214967	0.00416919	0.0242809	0.0197528	0.00952136	0.0111872	0.0203972	0.00669275	0.0124377	0.012218	0.00773724	0.0176646	0.0278509
muc	0.418059	0.455882	0.398591	0.427317	0.345535	0.443954	0.558048	0.49522	0.501577	0.522556	0.610122	0.494182	0.613883	0.461541	0.734627	0.445382	0.650042
CG5958	0.00183218	0.00392235	0.00439225	0.00187177	0	0.0065214	0.0511892	0.0048883	0.00647965	0.00698817	0.0292098	0.00308155	0.214594	0	0	0.00406903	0.631356
CG5973	0.00377548	0.00227424	0.002563	0.00333672	0	0.00318761	0.00298041	0.00626168	0.00926977	0.00611586	0.0127776	0.00208435	0.0328297	0	0	0.00544743	0.11141
santa-maria	0	0.0024423	0.000896226	0.00162094	0	0.00190415	0.0023212	0.000687221	0.000825345	0	0	0	0	0	0	0	0
CG6055	0	0.000319059	0.000463581	0	0	0	0	0.000299815	0	0.000489767	0	0	0.000645243	0	0	0	0
Ziz	0.171109	0.177444	0.115429	0.105886	0.102554	0.0866851	0.0658383	0.140207	0.0976949	0.0827534	0.0909464	0.0724998	0.119968	0.0764419	0.0421187	0.10086	0.126164
Obp28a	0.000606669	0.00063282	0.000405124	0	0	0	0	0.00157902	0	0.000327484	0.0012164	0	0	0.00429952	0	0	0
RapGAP1	0.967883	0.945366	0.835946	0.753412	0.7005	0.80112	0.432201	0.645529	0.434694	0.379984	0.267836	0.699314	0.526472	0.593545	0.241334	0.692273	0.413299
CR46063	0	0.000581027	0	0.000270589	0	0	0	0	0	0	0.000447584	0.00142933	0.000852327	0	0	0	0
CG6739	0.00397414	0.00620539	0.00351287	0.00052117	0	0.0133472	0	0.00241823	0.000919042	0	0.000556214	0.0141078	0.0276204	0.00171031	0	0.00182983	0.00984591
Tep2	0.00125551	0.000816577	0.00045543	0.000713831	0	0.00256655	0	0.00133301	0	0.000807907	0	0	0.00316099	0	0	0	0
Tep3	0.00222719	0	0.000891548	0.000418048	0	0	0	0.000938171	0	0	0	0	0	0	0	0	0
CG13795	0	0	0	0	0	0	0	0	0	0	0	0	0	0	0	0	0
CG7154	0.702368	0.573003	0.603931	0.596702	0.46312	0.537915	0.454088	0.326325	0.407999	0.333498	0.270106	0.317204	0.373312	0.301337	0.348897	0.334059	0.366084
CG7149	0	0.00156943	0.00264389	0.00162684	0	0	0	0.00232117	0.000841949	0.000357267	0.000368734	0	0.000646074	0.0017076	0	0	0
LKRSDH	0.0184078	0.0164629	0.0129263	0.0147591	0	0.00970392	0.0153465	0.00837289	0.0135112	0.0110827	0.0123957	0.00353507	0.0160332	0.0217182	0.012481	0.0176241	0
Herp	0.130611	0.125182	0.102066	0.11273	0.068889	0.101577	0.144041	0.113147	0.0901514	0.093829	0.101348	0.118136	0.109509	0.0982315	0.111039	0.109353	0.170071
r2d2	0.388739	0.464262	0.368632	0.385926	0.522734	0.403082	0.366581	0.351599	0.328115	0.329872	0.357359	0.415943	0.395141	0.415189	0.406758	0.32965	0.377551
cdc14	0.382299	0.368999	0.350966	0.308694	0.167379	0.317598	0.1933	0.167031	0.173851	0.150361	0.185513	0.180525	0.208997	0.129865	0.0725854	0.179321	0.341994
LanB1	4.5962	4.59437	4.32084	4.02204	3.4843	4.16744	2.89943	3.3113	2.4276	2.00045	1.66559	3.2667	2.10964	2.68193	1.68875	2.2806	1.35392
CR45008	0	0	0	0.000665764	0	0	0	0.000842006	0	0	0	0.00383369	0	0	0	0	0
CG7115	0.0662716	0.0666417	0.0662977	0.0645916	0.0320873	0.110392	0.0343001	0.0802458	0.0621366	0.0689063	0.063002	0.0636916	0.0800262	0.0431019	0.0385959	0.0778706	0.0624921
Rack1	35.2973	34.7905	34.7155	35.829	35.9016	35.4515	33.7693	36.9713	37.5393	37.7673	38.3066	36.6181	36.4417	35.6636	36.1889	38.2604	32.8573
mts	4.36705	4.10956	4.0523	3.87092	3.80569	3.68649	4.14568	3.24114	2.64821	2.81091	2.51698	3.1276	3.14175	3.63123	2.95426	2.82791	2.43689
CG14535	0	0	0	0	0	0	0	0	0.000400172	0.000407436	0	0	0.000870368	0	0	0	0
spz3	0.00293668	0.00351572	0.00238891	0.00111799	0	0.00230781	0	0.000542925	0.000554364	0.00119042	0.000418105	0.00301069	0	0.00201084	0	0	0
CG7102	0.0407238	0.0332852	0.0453153	0.0331356	0.0236382	0.0349321	0.0257861	0.0238289	0.0271679	0.0180048	0.0189116	0.0259532	0.0171691	0.0252347	0.0121715	0.024569	0.0175503
SmE	4.66794	4.27828	4.90803	4.45907	4.87366	4.60157	4.9703	4.14378	3.90206	3.48552	2.74292	4.40793	3.25811	4.25201	3.81168	3.2162	1.94631
CG34132	2.93532	2.88528	3.46518	3.50792	3.97681	3.52288	3.49139	4.54217	5.15442	5.06895	4.93943	4.35379	4.56609	4.48909	4.887	4.52625	3.46708
Snoo	0.499485	0.563923	0.25121	0.27269	0.190087	0.291181	0.15661	0.112382	0.0702556	0.0829007	0.0983268	0.12636	0.0922376	0.0868954	0.0305059	0.0634601	0.0898159
CG7231	0.0876603	0.0907892	0.103824	0.0728949	0.0461966	0.0887184	0.109118	0.106983	0.121098	0.068554	0.0604811	0.0948986	0.0846726	0.0875541	0.0413223	0.0625098	0.0682418
pes	0.15404	0.150244	0.158141	0.180799	0.0959206	0.0922063	0.0800745	0.162757	0.170216	0.186104	0.124997	0.141462	0.139242	0.142284	0.100417	0.148642	0.0701804
CG7227	0.000745323	0.00120708	0	0.00266868	0.0080188	0	0	0.000414593	0.00152571	0.00114872	0.000522775	0	0.00194376	0	0	0.00119102	0
CR44996	0.000311107	0.000766478	0	0	0	0	0	0.000398824	0.00135697	0.000585763	0.000540203	0	0	0	0	0	0
Sirup	1.91531	1.89566	1.15794	1.2147	0.5027	1.199	0.790755	1.10984	1.4104	1.28611	0.95345	0.944443	1.96864	0.762919	0.587532	1.53123	0.599608
Wwox	0.0950049	0.103304	0.0733251	0.129253	0.110559	0.117587	0.112688	0.113578	0.0964302	0.0707608	0.0693148	0.0846096	0.141214	0.132491	0.0914917	0.0562202	0.0277
Spn28Dc	0.0816664	0.0774601	0.0358165	0.0411625	0.0123527	0.0355134	0.0386522	0.00699124	0.00467191	0.00395726	0.000829326	0.0134334	0.000681207	0.00809194	0	0.00228834	0
CG12560	0.781411	0.852895	0.712303	1.36428	1.24617	1.20192	1.01094	0.893291	0.569118	0.547503	0.464049	0.94776	0.58165	0.894914	0.444432	0.512758	0.110357
CG34010	0.191466	0.153988	0.255288	0.279851	0.2727	0.256195	0.162692	0.274623	0.125946	0.0904037	0.0718757	0.289735	0.125535	0.278697	0.148804	0.111189	0.0843921
Tg	0.00989393	0.00945785	0.0083688	0.00874654	0.00294877	0.00510054	0	0.00694954	0.00131467	0.000811527	0.00128688	0.0129274	0.00180192	0	0	0.0013726	0
CG7367	0	0	0	0	0	0	0	0.000255654	0	0	0	0	0.000716059	0.00429952	0	0	0
baf	4.30741	3.32818	3.44236	3.65235	3.24512	3.18034	3.74689	2.14417	2.15922	2.57708	1.68898	2.12401	2.01401	2.26863	2.32037	1.94731	1.46541
Cka	0.451897	0.36748	0.431736	0.367701	0.331651	0.396068	0.289496	0.337653	0.273018	0.283316	0.237361	0.335354	0.303658	0.334163	0.189324	0.259641	0.274313
CCDC53	0.0638709	0.0735217	0.095568	0.0647961	0.0517032	0.0655667	0.104022	0.0843463	0.157541	0.109265	0.136151	0.117394	0.154676	0.110578	0.160931	0.129974	0.130453
RpL36A	47.493	46.5003	47.2392	49.5883	49.5818	49.0176	44.1628	50.9903	51.2372	51.6204	51.5935	50.7035	50.1418	48.769	46.7723	52.3216	43.9097
snoRNA:Psi28S-2648	0.00239194	0	0	0.00411189	0.00775609	0	0.00981895	0.00265235	0.00417166	0.00224659	0.00325739	0.00988728	0.00288612	0	0.0129406	0.00851878	0
CG7466	0.0371846	0.0314532	0.0332483	0.0371303	0.0268015	0.0331979	0.0181083	0.0284351	0.0407025	0.0346246	0.0312776	0.0514461	0.0353657	0.0489796	0.0296483	0.0383263	0
poe	0.546937	0.490774	0.470834	0.441685	0.310065	0.418907	0.384288	0.49041	0.452426	0.436289	0.420606	0.510434	0.525276	0.50788	0.340265	0.461995	0.303996
MED20	0.189985	0.145923	0.153847	0.145708	0.153762	0.180562	0.227077	0.132571	0.106561	0.120893	0.12172	0.147075	0.122861	0.136781	0.166018	0.116369	0.0920974
Trf	0.179084	0.173785	0.177327	0.184712	0.248834	0.185548	0.15744	0.157954	0.143815	0.141968	0.13534	0.147952	0.116373	0.184313	0.190838	0.139033	0.0900712
Mcr	0.0567048	0.0593275	0.0472969	0.058731	0.0379531	0.0658903	0.036856	0.0572957	0.0453199	0.0410598	0.0523606	0.0410879	0.0644125	0.0411307	0.0198954	0.0524766	0.0350836
Bsg	1.38729	1.37706	1.42298	1.56252	1.63715	1.45573	1.18612	1.74454	1.43359	1.36483	1.22926	1.57943	1.63438	1.30994	1.16962	1.43391	1.22627
mon2	0.0775403	0.0970096	0.0842025	0.0745427	0.0953195	0.094423	0.0742783	0.0932576	0.0879666	0.0872901	0.098918	0.118841	0.115294	0.0798214	0.0880713	0.110368	0.221576
CG8673	0	0	0	0	0	0	0.00334492	0.00129173	0	0.000760609	0	0	0	0	0	0.00115852	0
CG12375	0.253238	0.388947	0.267582	0.339016	0.429705	0.229914	0.41048	0.289049	0.36108	0.425949	0.505317	0.255195	0.397653	0.349363	0.55074	0.401691	0.486829
CG8668	0.235877	0.221009	0.230718	0.27228	0.225999	0.211522	0.168696	0.258791	0.221389	0.163628	0.23517	0.208328	0.250169	0.237356	0.211975	0.521326	0.313283
PAPLA1	0.081416	0.106086	0.085606	0.108641	0.128689	0.0747051	0.0786498	0.0853546	0.107011	0.101044	0.111202	0.122063	0.107387	0.0965645	0.115231	0.100893	0.18413
CG43394	0.0161576	0.00745829	0.0216706	0.0183659	0.00109869	0.0181958	0.0145529	0.011512	0.0216141	0.0196997	0.0125693	0.0186352	0.0109667	0.00562435	0.00313159	0.0103474	0
Rbsn-5	0.14712	0.138685	0.130803	0.143214	0.152691	0.155588	0.202116	0.129969	0.135134	0.132078	0.141496	0.13762	0.156525	0.187601	0.150092	0.121688	0.165757
CG8498	0.860926	0.975524	0.858548	0.877979	1.02308	1.10621	1.05824	1.0756	1.23843	1.11527	1.33638	1.26792	1.30696	1.20838	1.43289	1.18603	1.83018
Piezo	0.0461891	0.0479047	0.0560819	0.0522898	0.0294225	0.0367669	0.0417117	0.0530518	0.0567101	0.0583394	0.0612548	0.0348105	0.0685757	0.049541	0.0342397	0.061659	0.0900104
CG34134	0.0385485	0.0350924	0.0266041	0.0433965	0.0274987	0.0223162	0.0394688	0.0284718	0.0235518	0.0481666	0.0335216	0.0217448	0.0300075	0.0357135	0.023489	0.0400441	0.0394864
CG8475	0.0801332	0.0777556	0.0703276	0.0807706	0.0899724	0.0936134	0.0944398	0.0500451	0.0787625	0.0865039	0.0825011	0.0499171	0.0637182	0.0468326	0.0750212	0.0708964	0.085492
CR44116	0.00119508	0	0.00137122	0	0.00258945	0	0	0.00068342	0	0.000192369	0.000402066	0	0	0	0	0	0
CG8460	0.439542	0.586766	0.522054	0.385411	0.529373	0.451091	0.63474	0.349147	0.360237	0.293165	0.284379	0.359507	0.340233	0.412524	0.405352	0.329619	0.316334
PGAP5	0.0770758	0.0922415	0.0471261	0.0744666	0.0611071	0.066329	0.104268	0.0502346	0.0542164	0.0609427	0.0513726	0.0739249	0.0522259	0.044102	0.0637374	0.0507148	0.0318953
SLC5A11	0.00331897	0.0058637	0.00290258	0.00678359	0	0.00189229	0.00536076	0.00793948	0.00861472	0.00443124	0.0067611	0.00721801	0.00849551	0.00665191	0	0.0345695	0.0480574
CR44119	0.00970977	0.00639649	0.00604177	0.00972759	0	0.00282835	0.00220559	0.00448764	0.00474264	0.00882046	0.00273278	0.00130202	0.003269	0.0155006	0	0.00611169	0.00935476
CG8419	0.00338642	0.000775887	0.00244787	0.00158338	0	0	0.00303545	0.0030527	0.00371209	0.00359192	0.00121953	0	0	0	0	0	0
Su(var)205	6.18718	5.79006	5.81854	5.64531	5.7333	5.33077	6.10981	4.08279	3.18603	3.0319	2.4509	4.07623	3.04148	4.51272	2.86988	3.18945	1.84715
Ssb-c31a	2.47794	2.81345	2.87053	2.76902	2.96208	2.50674	2.92334	2.13954	2.07183	2.05645	1.58318	1.89371	2.06971	2.29534	2.11018	1.76667	1.05383
CG8372	0.818711	0.857323	0.785621	0.792331	0.813541	0.755573	0.92825	0.760966	0.826313	0.777144	0.831164	0.760836	0.745618	0.836231	0.754979	0.823185	0.603934
CG8360	0.0872349	0.112397	0.0834283	0.104913	0.0760236	0.0966072	0.090249	0.114782	0.127187	0.127384	0.170155	0.147344	0.141512	0.109679	0.131094	0.158262	0.244588
CG8353	0.0317699	0.0244104	0.0293557	0.0253505	0.0199988	0.0191454	0.019231	0.0355279	0.0246351	0.0278755	0.0275432	0.0175464	0.0188901	0.0264297	0.00779662	0.0314722	0.0213295
CG8349	0	0	0.00133168	0.00063507	0	0	0	0	0.000761335	0	0	0	0	0	0	0.000792389	0
CG8292	0.00399866	0.0056332	0.00902992	0.00669431	0	0.00575146	0.00443081	0.00181482	0.00500773	0.00382516	0.00225104	0.00590315	0.00389709	0.00252536	0.00502589	0.00127557	0
Snx6	0.792519	0.829546	0.783122	0.773217	0.938523	0.798952	0.825709	0.728559	0.642802	0.617679	0.590327	0.860603	0.851902	0.779523	0.696003	0.546385	0.531346
Pvr	0.099962	0.162424	0.0924681	0.112749	0.101328	0.0721124	0.0764258	0.0875987	0.147853	0.234307	0.301513	0.0922719	0.217004	0.131849	0.155088	0.245092	0.290335
CG8086	0	0	0	0	0	0	0	0	0.000575833	0	0	0	0.00419218	0	0	0	0
Btk29A	0.365581	0.356117	0.417181	0.309139	0.190187	0.341079	0.224591	0.274633	0.262918	0.243101	0.236368	0.33193	0.452188	0.179576	0.165045	0.264666	0.312733
wol	0.414436	0.442948	0.447468	0.416491	0.468781	0.399554	0.401962	0.41552	0.404559	0.412637	0.429902	0.478946	0.485281	0.357107	0.297502	0.403142	0.923035
Scgalpha	0	0.000364723	0.00391661	0.00243517	0	0	0	0.00818978	0.0065357	0.00343329	0.00280866	0.00817283	0.00220089	0.010164	0.00459211	0.00392644	0
CG7840	0.242901	0.298274	0.275711	0.26737	0.260879	0.205423	0.29939	0.26552	0.337292	0.338679	0.343791	0.279302	0.390973	0.228019	0.426961	0.308462	0.40702
Ostgamma	1.79705	1.86825	1.73131	1.71979	1.86164	1.86836	2.36285	1.93423	2.11843	2.01467	1.96415	2.12199	1.99704	2.22225	2.45084	1.97898	3.26275
Mettl14	0.174631	0.170956	0.153098	0.139132	0.0815643	0.185976	0.179618	0.100686	0.101852	0.102436	0.0952492	0.129912	0.121073	0.121169	0.173936	0.0985255	0.157248
CG7810	0.11093	0.111272	0.0857468	0.105921	0.0657148	0.109115	0.110944	0.0908963	0.0683103	0.0732123	0.0647192	0.0710421	0.0841006	0.0661746	0.0675058	0.0682005	0.0648033
CG7806	0.082353	0.0890817	0.068978	0.0606847	0.0582707	0.064968	0.0412703	0.0638388	0.059452	0.0530152	0.0509089	0.0800253	0.0666738	0.0400265	0.0282128	0.0532953	0.0505762
mtsh	0.000410273	0.00106149	0.000470511	0.00246195	0	0	0	0.00349139	0.00320588	0	0	0.00106619	0.00253591	0.00276531	0	0	0
CG7787	0.656023	0.777531	0.74462	0.721171	0.871029	0.762704	0.726355	0.706306	0.669677	0.64214	0.562017	0.796416	0.61673	0.708421	0.525866	0.621918	0.4243
CG7781	0.161553	0.265882	0.173049	0.2894	0.375451	0.330926	0.225222	0.450223	0.760512	0.745869	0.785598	0.392366	0.960306	0.290667	0.709341	0.152835	0.493248
CG14275	0.874753	1.80798	0.642754	0.949324	1.08758	0.694141	0.960096	0.616407	0.555402	0.304613	0.245456	0.309332	0.253402	0.408193	0.445786	0.0851481	0.209895
CG14274	0.00116384	0.000912049	0.00128711	0.00235641	0	0.00297643	0	0.000606182	0.000812203	0.000349264	0.00111393	0	0	0	0	0	0
CG7778	0.00135696	0.00183359	0	0.000979418	0	0	0.00225499	0	0	0	0.000572204	0	0	0	0	0	0
Mur29B	0	0	0	0	0	0	0	0	0	0	0.000304819	0	0	0	0	0	0
CG7627	0.165945	0.185034	0.1815	0.141305	0.111436	0.174846	0.149664	0.178795	0.204704	0.179558	0.207863	0.234051	0.211815	0.147441	0.210386	0.218795	0.158384
RpS13	34.1624	32.9995	33.0321	33.2561	34.2637	34.4038	23.4122	32.3788	33.0628	34.7338	33.05	34.9236	33.6886	27.8919	24.7486	32.9301	29.9523
CSN8	1.26582	1.25613	1.24952	1.1854	1.27743	1.16997	1.46561	1.16287	1.15659	1.06693	0.999244	1.05753	1.07009	1.23641	1.39454	1.05404	0.750892
Pp2A-29B	1.09784	1.07561	1.06815	0.944957	0.938335	0.99148	1.30493	0.784944	0.723739	0.683618	0.604363	0.851046	0.789683	0.972011	0.941677	0.753043	0.66557
CG17292	0.291016	0.374626	0.330031	0.316961	0.296929	0.265996	0.297304	0.282105	0.338395	0.248155	0.226428	0.258357	0.198931	0.335148	0.307679	0.267432	0.217483
Wdr82	0.319266	0.28188	0.280124	0.26492	0.238329	0.316773	0.406526	0.229128	0.201415	0.225004	0.219799	0.262461	0.244833	0.296543	0.352441	0.201841	0.175865
CG13390	0.227564	0.206491	0.197648	0.234238	0.169361	0.245866	0.243876	0.248451	0.250051	0.237334	0.228481	0.237357	0.212989	0.276353	0.254277	0.254062	0.0904649
CG17294	0.206348	0.245394	0.170155	0.206211	0.287491	0.180319	0.211822	0.21462	0.207023	0.249538	0.271607	0.223973	0.258817	0.217361	0.123578	0.259903	0.182849
AlaRS	0.876151	0.950702	0.957707	0.876562	0.913404	0.952779	1.22806	1.00057	0.976873	1.05305	1.09204	0.955816	0.785145	1.20382	1.306	1.19567	1.46507
CG13392	0.199496	0.22393	0.277094	0.197584	0.209626	0.146136	0.346972	0.158862	0.274164	0.247883	0.260057	0.13399	0.212873	0.227092	0.438414	0.25828	0.200604
Rcd4	0.140916	0.171864	0.168216	0.15353	0.17496	0.162793	0.252342	0.193079	0.204299	0.1426	0.136949	0.191353	0.098839	0.286818	0.245216	0.165132	0.171516
Dad1	2.39814	2.45546	2.4354	2.21922	2.34611	2.43189	2.69275	2.04431	1.99472	1.81952	1.83279	2.27881	1.9845	2.23078	2.07201	2.12397	3.43925
CG13384	0.103715	0.110445	0.0951409	0.13779	0.11212	0.112096	0.127983	0.175978	0.201904	0.243313	0.174989	0.0821816	0.0631772	0.20326	0.312281	0.209483	0.131723
CG42819	0	0	0	0	0	0	0	0	0	0.00145417	0.000597575	0	0	0	0	0.00180959	0
snRNA:U6atac:29B	0.00227077	0	0.00200076	0.00163049	0	0	0	0.000930826	0.000143248	0.00112156	0	0	0	0	0	0.00247008	0
Peritrophin-15a	0	0	0.00125305	0	0	0	0	0	0	0	0	0	0	0	0	0	0
CG13386	0.000660367	0.000597564	0.000626383	0.00134729	0	0	0	0.00271738	0.000878532	0.00113417	0.000856434	0.00564667	0.00180258	0	0	0	0
CG31898	0.0183203	0.069346	0.0440122	0.0265111	0.0725435	0.0132344	0.0108291	0.00845206	0.0266715	0.00346643	0.00490172	0.010097	0.00728323	0	0.0160549	0.00321558	0
fy	0.0268498	0.0185283	0.0182742	0.0163042	0.008095	0.0198134	0.0212792	0.0174718	0.0179087	0.0166206	0.0166483	0.017135	0.017465	0.0414561	0.00944028	0.0178288	0.00963503
CR44991	0.00155178	0	0.0013667	8.79168e-05	0	0.00335076	0	0.000587469	0	0.00159565	0	0	0	0	0	0	0
emb	1.10293	1.0098	1.00591	0.969784	0.867124	0.999135	0.722906	0.781421	0.760822	0.781354	0.679293	0.768403	0.836616	0.629525	0.654544	0.728222	0.831913
CG13397	0.0141303	0.0220941	0.018548	0.00843527	0.0023488	0.0217738	0.0239539	0.0192414	0.0112544	0.00699512	0.0060285	0.022387	0.0116901	0.00944079	0.00578115	0.0109509	0.00926698
CG13398	0.075674	0.0723258	0.0890502	0.0789743	0.0470267	0.0630864	0.0570944	0.103837	0.0954545	0.082057	0.0953394	0.0902769	0.114817	0.0814632	0.0699867	0.0993823	0.052955
Akap200	1.57651	1.47636	1.48124	1.19026	0.98635	0.857195	1.70783	0.761981	0.697615	0.532283	0.419716	0.70604	1.66392	1.1711	0.689852	1.1948	0.652276
grk	0.0040667	0.00594888	0.00455452	0.00288538	0.00360236	0.00438067	0	0.00389068	0.00373765	0.00268436	0.00176846	0.00435968	0.00395854	0.00264378	0.0023942	0.00527865	0
D12	0.0899129	0.0983073	0.111012	0.0823252	0.076975	0.0806809	0.0572522	0.0515428	0.079437	0.0607391	0.0524764	0.0469112	0.0752925	0.0636386	0.0525405	0.0698659	0.0624968
Chrac-14	0.646149	1.16351	1.41517	0.549183	1.00864	0.578508	0.887701	0.287152	1.00756	0.423578	0.565535	0.338409	0.66693	0.297393	0.69983	0.449629	0.379547
mus201	0.069069	0.110744	0.0973654	0.0708158	0.0910544	0.0669703	0.0756225	0.0473593	0.0822701	0.0552571	0.0734276	0.0574372	0.0672869	0.0467228	0.0559244	0.0723624	0.04102
CG31897	0.0237969	0.0249863	0.0138037	0.0150226	0.00181989	0.0188668	0	0.007852	0.00848526	0.00538857	0.00942094	0.0093574	0.0129903	0.00547226	0.0135676	0.0122722	0.0189198
U26	0.0369541	0.0649447	0.0384556	0.0457268	0.0338524	0.0292405	0.0550494	0.0503416	0.0605359	0.0439468	0.0480462	0.0348421	0.0506637	0.0777837	0.0359244	0.0530505	0.0283681
fu12	0.0222891	0.0368504	0.0306542	0.0101015	0.0114315	0.0128601	0.037685	0.00628764	0.00592748	0.00565408	0.00334555	0.0134023	0.0391219	0.00557026	0	0.00838361	0
fu2	0.160531	0.155541	0.125474	0.147882	0.188111	0.170967	0.230188	0.131821	0.143918	0.132939	0.149028	0.128257	0.123568	0.170391	0.132916	0.148231	0.13295
d	0.0228221	0.0285479	0.0237969	0.0236089	0.0107543	0.00879162	0.00958352	0.0093735	0.00429828	0.00212311	0.00133563	0.00237021	0.0018274	0	0	0.0067673	0
CheA29a	0	0	0	0	0	0	0	0.00023188	0	0	0.000282882	0	0.00134378	0	0	0	0
CR43604	0.00501816	0.00362135	0.00512226	0.00657392	0	0.012724	0.00374676	0.00432897	0.00531413	0.00534124	0.00220961	0	0.0082919	0.00331923	0	0.00475129	0.00983894
CG13088	0.0188843	0.0324437	0.0266246	0.0321879	0.0411478	0.0315988	0.0324678	0.0409755	0.0335514	0.037591	0.048546	0.0273004	0.0234013	0.0324383	0.0585247	0.0424019	0.036396
CG43400	0	0	0.00104164	0.000547118	0	0	0	0.000172748	0.0012362	0.00121409	0	0	0	0	0	0	0
Dh31	0	0	0	0.000366113	0	0	0	0	0	0	0	0	0	0	0	0	0
CG13096	1.79715	2.21714	1.87993	2.28246	3.04425	2.25716	2.43173	2.11711	2.2473	2.58122	2.53314	2.12999	1.8832	2.27077	3.0571	2.51186	1.70106
CG13097	0.573555	0.634816	0.624901	0.753977	0.697505	0.70805	0.61085	0.845727	0.926027	0.912385	0.828698	0.652333	0.593323	0.835466	0.794946	0.894226	0.227699
PIG-U	0.255212	0.265814	0.232548	0.249766	0.156897	0.233816	0.316077	0.179214	0.204356	0.196278	0.18198	0.152314	0.195016	0.186533	0.259332	0.160919	0.159416
mRpL51	0.646897	0.651818	0.731062	0.665884	0.658152	0.644487	0.778767	0.730703	0.837344	0.9019	1.00015	0.819116	0.837682	0.861337	1.20163	0.740101	0.927642
Uba4	0.125142	0.154975	0.13605	0.13442	0.223144	0.117773	0.264406	0.105582	0.126827	0.125448	0.131401	0.0955632	0.138968	0.179062	0.203967	0.112404	0.157552
CG13091	0.000402822	0	0.000275266	0.000202921	0	0.00155007	0.00206533	0.000893606	0	0.000652603	0.000817198	0.00237821	0.000208698	0	0	0	0
Acer	0.0201629	0.0246883	0.0299264	0.0183511	0.0184358	0.0255629	0.0517541	0.0172324	0.0145721	0.0137064	0.011362	0.0256805	0.0114599	0.0224357	0.00609621	0.0167709	0.0155029
[truncated: 11,872 more rows]
