# Supplementary material for: A single-cell atlas reveals unanticipated cell type complexity in Drosophila ovaries
Source: HighWire-hosted journal article supplement (doi:10.1101/gr.274340.120), 2021-08-13
Supplement: Supplemental_Table_S3.xlsx [file Supplemental_Table_S3.xlsx]

## Sheet: Supplemental_Table_S3
Supplemental Table 3 - GLAD Analyses
Table with GLAD categories for each marker gene. Table has following columns: cluster - the cluster in which the gene is enriched, gene - gene symbol, Primary FBgn - FBgn, Group(s), Sub-group and Sub-sub-group - GLAD categories and their subgroups, Confidence - transcription factor confidence score (Hu et al. 2015).
	cluster	gene	Primary FBgn	Group(s)	Sub-group (if any)	Sub-sub-group (if any)	Confidence	Comments
1	GSC/CB/2-cc	5.8SrRNA-Psi:CR45863	FBgn0267523	None
2	GSC/CB/2-cc	Acf	FBgn0027620	Transcription factor/DNA binding	DNA-binding with transcription factor activity		High
3	GSC/CB/2-cc	Acf	FBgn0027620	Ubiquitin-related
4	GSC/CB/2-cc	Act42A	FBgn0000043	Cytoskeletal
5	GSC/CB/2-cc	Act5C	FBgn0000042	Cytoskeletal
6	GSC/CB/2-cc	Act5C	FBgn0000042	Mitochondrial
7	GSC/CB/2-cc	alphaTub84B	FBgn0003884	Cytoskeletal
8	GSC/CB/2-cc	alphaTub84B	FBgn0003884	Mitochondrial
9	GSC/CB/2-cc	Ant2	FBgn0025111	Mitochondrial
10	GSC/CB/2-cc	Ant2	FBgn0025111	Trans-membrane proteins
11	GSC/CB/2-cc	Ant2	FBgn0025111	Transporters	Secondary Transporter	The Mitochondrial Carrier (MC) Family
12	GSC/CB/2-cc	Ant2	FBgn0025111	Metabolic vs2
13	GSC/CB/2-cc	arm	FBgn0000117	Cytoskeletal
14	GSC/CB/2-cc	arm	FBgn0000117	Human Disease	HuDis670
15	GSC/CB/2-cc	arm	FBgn0000117	Major signaling pathways	WNT signaling pathway	TF
16	GSC/CB/2-cc	Atg8a	FBgn0052672	Autophagy-related
17	GSC/CB/2-cc	aub	FBgn0000146	RNA-binding
18	GSC/CB/2-cc	aub	FBgn0000146	Spliceosome
19	GSC/CB/2-cc	aurB	FBgn0024227	Cytoskeletal
20	GSC/CB/2-cc	aurB	FBgn0024227	Kinases	Protein Kinase
21	GSC/CB/2-cc	baf	FBgn0031977	Human Disease	HuDis670
22	GSC/CB/2-cc	bam	FBgn0000158	None
23	GSC/CB/2-cc	betaTub56D	FBgn0284243	None
24	GSC/CB/2-cc	Bgb	FBgn0013753	Human Disease	HuDis670
25	GSC/CB/2-cc	Bgb	FBgn0013753	Transcription factor/DNA binding	Co-factor	CBF-beta		TFscore=NA
26	GSC/CB/2-cc	blanks	FBgn0035608	RNA-binding
27	GSC/CB/2-cc	Cap-D2	FBgn0039680	None
28	GSC/CB/2-cc	cav	FBgn0026257	None
29	GSC/CB/2-cc	CG10063	FBgn0035727	Mitochondrial
30	GSC/CB/2-cc	CG10063	FBgn0035727	Trans-membrane proteins
31	GSC/CB/2-cc	CG10405	FBgn0038431	Serine proteases
32	GSC/CB/2-cc	CG11267	FBgn0036334	Chaperone and heat shock proteins
33	GSC/CB/2-cc	CG11267	FBgn0036334	Mitochondrial
34	GSC/CB/2-cc	CG11825	FBgn0033519	Mitochondrial
35	GSC/CB/2-cc	CG11825	FBgn0033519	Trans-membrane proteins
36	GSC/CB/2-cc	CG11825	FBgn0033519	Conserved in bilaterians/lost in nematodes
37	GSC/CB/2-cc	CG12493	FBgn0035571	RNA-binding
38	GSC/CB/2-cc	CG12702	FBgn0031070	None
39	GSC/CB/2-cc	CG12782	FBgn0034838	None
40	GSC/CB/2-cc	CG12851	FBgn0035086	None
41	GSC/CB/2-cc	CG13029	FBgn0036670	Trans-membrane proteins
42	GSC/CB/2-cc	CG13540	FBgn0034839	None
43	GSC/CB/2-cc	CG14072	FBgn0032318	None
44	GSC/CB/2-cc	CG14346	FBgn0031337	None
45	GSC/CB/2-cc	CG14561	FBgn0037149	None
46	GSC/CB/2-cc	CG14657	FBgn0037282	None
47	GSC/CB/2-cc	CG14931	FBgn0032374	None
48	GSC/CB/2-cc	CG14932	FBgn0032375	None
49	GSC/CB/2-cc	CG1503	FBgn0031157	Ubiquitin-related
50	GSC/CB/2-cc	CG15172	FBgn0032740	None
51	GSC/CB/2-cc	CG15398	FBgn0031446	Transcription factor/DNA binding	DNA-binding with transcription factor activity
52	GSC/CB/2-cc	CG15398	FBgn0031446	Trans-membrane proteins
53	GSC/CB/2-cc	CG17265	FBgn0031488	None
54	GSC/CB/2-cc	CG1827	FBgn0033431	Human Disease	HuDis670
55	GSC/CB/2-cc	CG1827	FBgn0033431	Metabolic	enzyme
56	GSC/CB/2-cc	CG1827	FBgn0033431	Metabolic vs2
57	GSC/CB/2-cc	CG1894	FBgn0039585	Transcription factor/DNA binding	Chromatin regulation
58	GSC/CB/2-cc	CG2247	FBgn0030320	Ubiquitin-related
59	GSC/CB/2-cc	CG2887	FBgn0030207	Chaperone and heat shock proteins
60	GSC/CB/2-cc	CG3011	FBgn0029823	Metabolic	enzyme
61	GSC/CB/2-cc	CG3011	FBgn0029823	Mitochondrial
62	GSC/CB/2-cc	CG3011	FBgn0029823	Methyltransferase				Source: GO and domain annotation
63	GSC/CB/2-cc	CG3011	FBgn0029823	Metabolic vs2
64	GSC/CB/2-cc	CG32483	FBgn0052483	None
65	GSC/CB/2-cc	CG32814	FBgn0052814	None
66	GSC/CB/2-cc	CG34261	FBgn0085290	Ubiquitin-related
67	GSC/CB/2-cc	CG34261	FBgn0085290	Metabolic vs2
68	GSC/CB/2-cc	CG34323	FBgn0085352	None
69	GSC/CB/2-cc	CG34355	FBgn0085384	Glycoproteins
70	GSC/CB/2-cc	CG34355	FBgn0085384	Trans-membrane proteins
71	GSC/CB/2-cc	CG34445	FBgn0085474	None
72	GSC/CB/2-cc	CG3638	FBgn0261444	Trans-membrane proteins
73	GSC/CB/2-cc	CG3638	FBgn0261444	Ion channel		Y
74	GSC/CB/2-cc	CG42232	FBgn0250754	Transcription factor/DNA binding	Maybe TF
75	GSC/CB/2-cc	CG4300	FBgn0036272	Human Disease	HuDis670
76	GSC/CB/2-cc	CG4300	FBgn0036272	Metabolic	enzyme
77	GSC/CB/2-cc	CG4300	FBgn0036272	Methyltransferase				Source: domain annotation
78	GSC/CB/2-cc	CG4300	FBgn0036272	Metabolic vs2
79	GSC/CB/2-cc	CG4949	FBgn0030813	None
80	GSC/CB/2-cc	CG5111	FBgn0039343	Ubiquitin-related
81	GSC/CB/2-cc	CG5111	FBgn0039343	Conserved in bilaterians/lost in nematodes
82	GSC/CB/2-cc	CG5194	FBgn0035955	None
83	GSC/CB/2-cc	CG6084	FBgn0086254	Metabolic	enzyme
84	GSC/CB/2-cc	CG6084	FBgn0086254	Mitochondrial
85	GSC/CB/2-cc	CG6084	FBgn0086254	Metabolic vs2
86	GSC/CB/2-cc	CG6628	FBgn0036072	Secreted proteins
87	GSC/CB/2-cc	CG6693	FBgn0037878	Chaperone and heat shock proteins
88	GSC/CB/2-cc	CG7372	FBgn0036522	Transcription factor/DNA binding	DNA-binding with transcription factor activity	zf-C2H2	Medium	TFscore=6
89	GSC/CB/2-cc	CG8066	FBgn0038243	None
90	GSC/CB/2-cc	CG8223	FBgn0037624	None
91	GSC/CB/2-cc	CG8289	FBgn0030854	None
92	GSC/CB/2-cc	CG9003	FBgn0033639	Trans-membrane proteins
93	GSC/CB/2-cc	CG9003	FBgn0033639	Ubiquitin-related
94	GSC/CB/2-cc	CG9135	FBgn0031769	None
95	GSC/CB/2-cc	CG9705	FBgn0036661	RNA-binding
96	GSC/CB/2-cc	CG9705	FBgn0036661	Transcription factor/DNA binding	DNA-binding with transcription factor activity		Medium
97	GSC/CB/2-cc	CG9705	FBgn0036661	Conserved in bilaterians/lost in nematodes
98	GSC/CB/2-cc	CG9801	FBgn0037623	Metabolic	other
99	GSC/CB/2-cc	CG9801	FBgn0037623	Metabolic vs2
100	GSC/CB/2-cc	CG9926	FBgn0038190	None
101	GSC/CB/2-cc	Chd64	FBgn0035499	Cytoskeletal
102	GSC/CB/2-cc	Chd64	FBgn0035499	Mitochondrial
103	GSC/CB/2-cc	chinmo	FBgn0086758	Transcription factor/DNA binding	DNA-binding with transcription factor activity	zf-C2H2	Medium	TFscore=6
104	GSC/CB/2-cc	chinmo	FBgn0086758	Ubiquitin-related
105	GSC/CB/2-cc	chrb	FBgn0036165	Conserved in bilaterians/lost in nematodes
106	GSC/CB/2-cc	cmet	FBgn0040232	Cytoskeletal
107	GSC/CB/2-cc	CR31044	FBgn0051044	None
108	GSC/CB/2-cc	CR42254	FBgn0259112	None
109	GSC/CB/2-cc	CR43264	FBgn0262945	None
110	GSC/CB/2-cc	CR43334	Dmel	None
111	GSC/CB/2-cc	CR43651	FBgn0263660	None
112	GSC/CB/2-cc	CR43857	FBgn0264439	None
113	GSC/CB/2-cc	CR43870	FBgn0264462	None
114	GSC/CB/2-cc	CycE	FBgn0010382	None
115	GSC/CB/2-cc	Cyt-c1L	FBgn0039651	Autophagy-related
116	GSC/CB/2-cc	Cyt-c1L	FBgn0039651	Metabolic	enzyme
117	GSC/CB/2-cc	Cyt-c1L	FBgn0039651	Metabolic vs2
118	GSC/CB/2-cc	D1	FBgn0000412	Transcription factor/DNA binding	DNA-binding with transcription factor activity	AT_hook	High	TFscore=5
119	GSC/CB/2-cc	Dg	FBgn0034072	Glycoproteins
120	GSC/CB/2-cc	Dg	FBgn0034072	Trans-membrane proteins
121	GSC/CB/2-cc	Drep2	FBgn0028408	None
122	GSC/CB/2-cc	eIF4G2	FBgn0260634	Metabolic	other
123	GSC/CB/2-cc	eIF4G2	FBgn0260634	RNA-binding
124	GSC/CB/2-cc	eIF4G2	FBgn0260634	Metabolic vs2
125	GSC/CB/2-cc	enc	FBgn0004875	None
126	GSC/CB/2-cc	Fas2	FBgn0000635	Trans-membrane proteins
127	GSC/CB/2-cc	Fer2LCH	FBgn0015221	Mitochondrial
128	GSC/CB/2-cc	Fer2LCH	FBgn0015221	Metabolic vs2
129	GSC/CB/2-cc	fuss	FBgn0039932	Conserved in bilaterians/lost in nematodes
130	GSC/CB/2-cc	fzy	FBgn0001086	None
131	GSC/CB/2-cc	Gbeta13F	FBgn0001105	Mitochondrial
132	GSC/CB/2-cc	glu	FBgn0015391	Cytoskeletal
133	GSC/CB/2-cc	glu	FBgn0015391	Transcription factor/DNA binding	DNA-binding with transcription factor activity
134	GSC/CB/2-cc	Gnf1	FBgn0004913	None
135	GSC/CB/2-cc	heph	FBgn0011224	Cytoskeletal
136	GSC/CB/2-cc	heph	FBgn0011224	RNA-binding
137	GSC/CB/2-cc	heph	FBgn0011224	Spliceosome
138	GSC/CB/2-cc	HipHop	FBgn0036815	None
139	GSC/CB/2-cc	His2Av	FBgn0001197	Mitochondrial
140	GSC/CB/2-cc	how	FBgn0264491	RNA-binding
141	GSC/CB/2-cc	how	FBgn0264491	Spliceosome
142	GSC/CB/2-cc	HP6	FBgn0031613	Transcription factor/DNA binding	DNA-binding with transcription factor activity
143	GSC/CB/2-cc	Hsp23	FBgn0001224	Chaperone and heat shock proteins
144	GSC/CB/2-cc	Hsp23	FBgn0001224	Cytoskeletal
145	GSC/CB/2-cc	Hsp26	FBgn0001225	Chaperone and heat shock proteins
146	GSC/CB/2-cc	Hsp27	FBgn0001226	Chaperone and heat shock proteins
147	GSC/CB/2-cc	Jupiter	FBgn0051363	Cytoskeletal
148	GSC/CB/2-cc	karr	FBgn0040784	None
149	GSC/CB/2-cc	krimp	FBgn0034098	RNA-binding
150	GSC/CB/2-cc	l(2)k09913	FBgn0021979	Mitochondrial
151	GSC/CB/2-cc	l(2)k09913	FBgn0021979	Peroxisomal
152	GSC/CB/2-cc	l(2)k09913	FBgn0021979	Trans-membrane proteins
153	GSC/CB/2-cc	lbk	FBgn0034083	Glycoproteins
154	GSC/CB/2-cc	lbk	FBgn0034083	Trans-membrane proteins
155	GSC/CB/2-cc	lbk	FBgn0034083	Conserved in bilaterians/lost in nematodes
156	GSC/CB/2-cc	mad2	FBgn0035640	None
157	GSC/CB/2-cc	mahe	FBgn0029979	RNA-binding
158	GSC/CB/2-cc	mamo	FBgn0267033	Transcription factor/DNA binding	DNA-binding with transcription factor activity	zf-C2H2	Medium	TFscore=6
159	GSC/CB/2-cc	mamo	FBgn0267033	Ubiquitin-related
160	GSC/CB/2-cc	Mcm3	FBgn0284442	None
161	GSC/CB/2-cc	Mcr	FBgn0267488	Glycoproteins
162	GSC/CB/2-cc	Mcr	FBgn0267488	Secreted proteins
163	GSC/CB/2-cc	Mcr	FBgn0267488	Trans-membrane proteins
164	GSC/CB/2-cc	mei-P26	FBgn0026206	Transcription factor/DNA binding	Maybe TF
165	GSC/CB/2-cc	mei-P26	FBgn0026206	Ubiquitin-related
166	GSC/CB/2-cc	Mink	FBgn0039250	None
167	GSC/CB/2-cc	msd1	FBgn0035209	None
168	GSC/CB/2-cc	ord	FBgn0003009	None
169	GSC/CB/2-cc	Ote	FBgn0266420	Cytoskeletal
170	GSC/CB/2-cc	Ote	FBgn0266420	Trans-membrane proteins
171	GSC/CB/2-cc	Oxp	FBgn0034255	None
172	GSC/CB/2-cc	p120ctn	FBgn0260799	None
173	GSC/CB/2-cc	Paip2	FBgn0038100	None
174	GSC/CB/2-cc	PCNA	FBgn0005655	Metabolic	enzyme
175	GSC/CB/2-cc	PCNA	FBgn0005655	Metabolic vs2
176	GSC/CB/2-cc	Pdcd4	FBgn0030520	Conserved in bilaterians/lost in nematodes
177	GSC/CB/2-cc	Pdi	FBgn0286818	None
178	GSC/CB/2-cc	Pdk	FBgn0017558	Kinases	Protein Kinase
179	GSC/CB/2-cc	Pdk	FBgn0017558	Metabolic	enzyme
180	GSC/CB/2-cc	Pdk	FBgn0017558	Mitochondrial
181	GSC/CB/2-cc	Pdk	FBgn0017558	Metabolic vs2
182	GSC/CB/2-cc	Pen	FBgn0267727	Trans-membrane proteins
183	GSC/CB/2-cc	PMP34	FBgn0052250	Metabolic	other
184	GSC/CB/2-cc	PMP34	FBgn0052250	Peroxisomal
185	GSC/CB/2-cc	PMP34	FBgn0052250	Trans-membrane proteins
186	GSC/CB/2-cc	PMP34	FBgn0052250	Transporters	Secondary Transporter	The Mitochondrial Carrier (MC) Family
187	GSC/CB/2-cc	PMP34	FBgn0052250	Metabolic vs2
188	GSC/CB/2-cc	pnt	FBgn0003118	Cytoskeletal
189	GSC/CB/2-cc	pnt	FBgn0003118	Major signaling pathways	EGFR and PVR RTK signaling pathway	TF
190	GSC/CB/2-cc	pnt	FBgn0003118	Major signaling pathways	FGFR signaling pathway	TF
191	GSC/CB/2-cc	pnt	FBgn0003118	Transcription factor/DNA binding	DNA-binding with transcription factor activity	Ets	High	TFscore=1
192	GSC/CB/2-cc	Rcd-1	FBgn0031047	None
193	GSC/CB/2-cc	RnrL	FBgn0011703	Metabolic	enzyme
194	GSC/CB/2-cc	RnrL	FBgn0011703	Metabolic vs2
195	GSC/CB/2-cc	RpS10a	FBgn0027494	Ribosome
196	GSC/CB/2-cc	RpS19b	FBgn0039129	Human Disease	HuDis670
197	GSC/CB/2-cc	RpS19b	FBgn0039129	Ribosome
198	GSC/CB/2-cc	Rpt3R	FBgn0037742	Autophagy-related
199	GSC/CB/2-cc	Rpt3R	FBgn0037742	Proteasome
200	GSC/CB/2-cc	Rrp1	FBgn0004584	Phosphatases	Non-protein Phosphatase
201	GSC/CB/2-cc	Sans	FBgn0033785	Human Disease	HuDis670
202	GSC/CB/2-cc	Sans	FBgn0033785	Conserved in bilaterians/lost in nematodes
203	GSC/CB/2-cc	shep	FBgn0052423	RNA-binding
204	GSC/CB/2-cc	sle	FBgn0037810	None
205	GSC/CB/2-cc	SMC2	FBgn0027783	None
206	GSC/CB/2-cc	Sodh-2	FBgn0022359	Human Disease	HuDis670
207	GSC/CB/2-cc	Sodh-2	FBgn0022359	Metabolic	enzyme
208	GSC/CB/2-cc	Sodh-2	FBgn0022359	Metabolic vs2
209	GSC/CB/2-cc	stai	FBgn0266521	Cytoskeletal
210	GSC/CB/2-cc	Syx4	FBgn0024980	Receptors
211	GSC/CB/2-cc	Syx4	FBgn0024980	Trans-membrane proteins
212	GSC/CB/2-cc	tej	FBgn0033921	None
213	GSC/CB/2-cc	TfIIA-S	FBgn0013347	Transcription factor/DNA binding	DNA-binding with transcription factor activity
214	GSC/CB/2-cc	trsn	FBgn0033528	Trans-membrane proteins
215	GSC/CB/2-cc	Tsp42Ef	FBgn0033127	Trans-membrane proteins
216	GSC/CB/2-cc	tum	FBgn0086356	Major signaling pathways	TNF alpha signaling pathway	other
217	GSC/CB/2-cc	tut	FBgn0052364	RNA-binding
218	GSC/CB/2-cc	Ubi-p63E	FBgn0003943	Ubiquitin-related
219	GSC/CB/2-cc	unc-119	FBgn0025549	Human Disease	HuDis670
220	GSC/CB/2-cc	unc-13	FBgn0025726	None
221	GSC/CB/2-cc	vas	FBgn0283442	None
222	GSC/CB/2-cc	wap	FBgn0266848	None
223	GSC/CB/2-cc	Xrp1	FBgn0261113	Transcription factor/DNA binding	DNA-binding with transcription factor activity	AT_hook	Medium	TFscore=6
224	4-cc	28SrRNA-Psi:CR45855	FBgn0267515	None
225	4-cc	28SrRNA-Psi:CR45859	FBgn0267519	None
226	4-cc	Adf1	FBgn0284249	None
227	4-cc	agt	FBgn0024912	Methyltransferase				Source: GO and domain annotation
228	4-cc	Akap200	FBgn0027932	None
229	4-cc	Ant2	FBgn0025111	Mitochondrial
230	4-cc	Ant2	FBgn0025111	Trans-membrane proteins
231	4-cc	Ant2	FBgn0025111	Transporters	Secondary Transporter	The Mitochondrial Carrier (MC) Family
232	4-cc	Ant2	FBgn0025111	Metabolic vs2
233	4-cc	asf1	FBgn0029094	Spliceosome
234	4-cc	ATPsynepsilonL	FBgn0051477	Metabolic	enzyme
235	4-cc	ATPsynepsilonL	FBgn0051477	Transporters	ATP-Dependent	The H+- or Na+-translocating F-type, V-type and A-type ATPase (F-ATPase) Superfamily
236	4-cc	ATPsynepsilonL	FBgn0051477	Metabolic vs2
237	4-cc	Bacc	FBgn0031453	None
238	4-cc	baf	FBgn0031977	Human Disease	HuDis670
239	4-cc	ball	FBgn0027889	Human Disease	HuDis670
240	4-cc	ball	FBgn0027889	Kinases	Protein Kinase
241	4-cc	blanks	FBgn0035608	RNA-binding
242	4-cc	borr	FBgn0032105	Cytoskeletal
243	4-cc	Bsg	FBgn0261822	Cytoskeletal
244	4-cc	Bsg	FBgn0261822	Mitochondrial
245	4-cc	Bsg	FBgn0261822	Trans-membrane proteins
246	4-cc	bun	FBgn0259176	Transcription factor/DNA binding	DNA-binding with transcription factor activity	TSC22		TFscore=NA
247	4-cc	c(3)G	FBgn0000246	None
248	4-cc	Caf1-180	FBgn0030054	None
249	4-cc	Cap-D2	FBgn0039680	None
250	4-cc	cathD	FBgn0029093	Glycoproteins
251	4-cc	cathD	FBgn0029093	Human Disease	HuDis670
252	4-cc	cathD	FBgn0029093	Mitochondrial
253	4-cc	cathD	FBgn0029093	Matrisome	Homologs/Orthologs to Mammalian Matrisome-Associated Genes	ECM Regulators		Cathepsin
254	4-cc	cav	FBgn0026257	None
255	4-cc	Cdc6	FBgn0035918	Human Disease	HuDis670
256	4-cc	CG10151	FBgn0033960	None
257	4-cc	CG10326	FBgn0038453	Trans-membrane proteins
258	4-cc	CG10326	FBgn0038453	Conserved in bilaterians/lost in nematodes
259	4-cc	CG10336	FBgn0032698	None
260	4-cc	CG10880	FBgn0031398	Trans-membrane proteins
261	4-cc	CG14438	Dmel	None
262	4-cc	CG14932	FBgn0032375	None
263	4-cc	CG15628	FBgn0031632	None
264	4-cc	CG15891	FBgn0029860	None
265	4-cc	CG1910	FBgn0022349	None
266	4-cc	CG1943	FBgn0037468	None
267	4-cc	CG2247	FBgn0030320	Ubiquitin-related
268	4-cc	CG30383	FBgn0050383	None
269	4-cc	CG32243	FBgn0052243	None
270	4-cc	CG34323	FBgn0085352	None
271	4-cc	CG3630	FBgn0023540	None
272	4-cc	CG43736	FBgn0263993	None
273	4-cc	CG44774	FBgn0266000	None
274	4-cc	CG4570	FBgn0037844	Transcription factor/DNA binding	DNA-binding with transcription factor activity		Medium
275	4-cc	CG5059	FBgn0037007	Trans-membrane proteins
276	4-cc	CG5885	FBgn0025700	Trans-membrane proteins
277	4-cc	CG6540	FBgn0030943	None
278	4-cc	CG6693	FBgn0037878	Chaperone and heat shock proteins
279	4-cc	CG6701	FBgn0033889	Spliceosome
280	4-cc	CG6701	FBgn0033889	Transcription factor/DNA binding	DNA-binding with transcription factor activity		Medium
281	4-cc	CG7593	FBgn0039687	None
282	4-cc	CG8289	FBgn0030854	None
283	4-cc	CG8300	FBgn0029937	None
284	4-cc	CG9752	FBgn0034614	None
285	4-cc	CG9801	FBgn0037623	Metabolic	other
286	4-cc	CG9801	FBgn0037623	Metabolic vs2
287	4-cc	Chrac-14	FBgn0043002	Metabolic	other
288	4-cc	Chrac-14	FBgn0043002	Ubiquitin-related
289	4-cc	Chrac-14	FBgn0043002	Metabolic vs2
290	4-cc	chrb	FBgn0036165	Conserved in bilaterians/lost in nematodes
291	4-cc	Claspin	FBgn0052251	None
292	4-cc	cona	FBgn0038612	None
293	4-cc	corolla	FBgn0267967	None
294	4-cc	CR42862	FBgn0262109	None
295	4-cc	CtBP	FBgn0020496	Transcription factor/DNA binding	Co-factor
296	4-cc	CycE	FBgn0010382	None
297	4-cc	Det	FBgn0264291	None
298	4-cc	Df31	FBgn0022893	Transcription factor/DNA binding	Chromatin regulation
299	4-cc	DNA-ligI	FBgn0262619	Human Disease	HuDis670
300	4-cc	DNApol-alpha180	FBgn0259113	Human Disease	HuDis670
301	4-cc	DNApol-alpha60	FBgn0259676	None
302	4-cc	DNApol-alpha73	FBgn0005696	None
303	4-cc	dnk	FBgn0022338	Human Disease	HuDis670
304	4-cc	dnk	FBgn0022338	Kinases	Non-protein Kinase
305	4-cc	dnk	FBgn0022338	Metabolic	enzyme
306	4-cc	dnk	FBgn0022338	Conserved in bilaterians/lost in nematodes
307	4-cc	dnk	FBgn0022338	Metabolic vs2
308	4-cc	dock	FBgn0010583	Major signaling pathways	EGFR and PVR RTK signaling pathway	other
309	4-cc	dock	FBgn0010583	Metabolic	other
310	4-cc	dock	FBgn0010583	Metabolic vs2
311	4-cc	dpa	FBgn0015929	None
312	4-cc	Dsp1	FBgn0278608	Major signaling pathways	Imd pathway
313	4-cc	Dsp1	FBgn0278608	Transcription factor/DNA binding	DNA-binding with transcription factor activity	HMG_box	High	TFscore=5
314	4-cc	E(spl)m7-HLH	FBgn0002633	Major signaling pathways	NOTCH signaling pathway	TF
315	4-cc	E(spl)m7-HLH	FBgn0002633	Transcription factor/DNA binding	DNA-binding with transcription factor activity	HLH	High	TFscore=3
316	4-cc	E(spl)m8-HLH	FBgn0000591	Major signaling pathways	NOTCH signaling pathway	TF
317	4-cc	E(spl)m8-HLH	FBgn0000591	Transcription factor/DNA binding	DNA-binding with transcription factor activity	HLH	High	TFscore=5
318	4-cc	ed	FBgn0000547	Cytoskeletal
319	4-cc	ed	FBgn0000547	Glycoproteins
320	4-cc	ed	FBgn0000547	Trans-membrane proteins
321	4-cc	egg	FBgn0086908	Transcription factor/DNA binding	DNA-binding with transcription factor activity		Medium
322	4-cc	egg	FBgn0086908	Methyltransferase				Source: GO and domain annotation
323	4-cc	enc	FBgn0004875	None
324	4-cc	ERp60	FBgn0033663	Chaperone and heat shock proteins
325	4-cc	ERp60	FBgn0033663	Metabolic	enzyme
326	4-cc	ERp60	FBgn0033663	Mitochondrial
327	4-cc	ERp60	FBgn0033663	Metabolic vs2
328	4-cc	Gp150	FBgn0013272	Glycoproteins
329	4-cc	Gp150	FBgn0013272	Trans-membrane proteins
330	4-cc	HipHop	FBgn0036815	None
331	4-cc	HmgD	FBgn0004362	Transcription factor/DNA binding	DNA-binding with transcription factor activity	HMG_box	Medium	TFscore=6
332	4-cc	HmgZ	FBgn0010228	Transcription factor/DNA binding	DNA-binding with transcription factor activity	HMG_box	Medium	TFscore=6
333	4-cc	hrg	FBgn0015949	RNA-binding
334	4-cc	hrg	FBgn0015949	Spliceosome
335	4-cc	hrg	FBgn0015949	Transcription factor/DNA binding	Maybe TF
336	4-cc	Hsp23	FBgn0001224	Chaperone and heat shock proteins
337	4-cc	Hsp23	FBgn0001224	Cytoskeletal
338	4-cc	Hsp27	FBgn0001226	Chaperone and heat shock proteins
339	4-cc	Ibf2	FBgn0037669	None
340	4-cc	Jupiter	FBgn0051363	Cytoskeletal
341	4-cc	kcc	FBgn0261794	Glycoproteins
342	4-cc	kcc	FBgn0261794	Mitochondrial
343	4-cc	kcc	FBgn0261794	Trans-membrane proteins
344	4-cc	kcc	FBgn0261794	Transporters	Secondary Transporter	The Cation-Chloride Cotransporter (CCC) Family
345	4-cc	kcc	FBgn0261794	Metabolic vs2
346	4-cc	kuk	FBgn0038476	None
347	4-cc	Lam	FBgn0002525	Cytoskeletal
348	4-cc	Lam	FBgn0002525	Human Disease	HuDis670
349	4-cc	Lam	FBgn0002525	Mitochondrial
350	4-cc	mamo	FBgn0267033	Transcription factor/DNA binding	DNA-binding with transcription factor activity	zf-C2H2	Medium	TFscore=6
351	4-cc	mamo	FBgn0267033	Ubiquitin-related
352	4-cc	Mcm10	FBgn0032929	None
353	4-cc	Mcm2	FBgn0014861	Autophagy-related
354	4-cc	Mcm3	FBgn0284442	None
355	4-cc	Mcm5	FBgn0017577	None
356	4-cc	Mcm6	FBgn0025815	Human Disease	HuDis670
357	4-cc	Mcr	FBgn0267488	Glycoproteins
358	4-cc	Mcr	FBgn0267488	Secreted proteins
359	4-cc	Mcr	FBgn0267488	Trans-membrane proteins
360	4-cc	mei-P26	FBgn0026206	Transcription factor/DNA binding	Maybe TF
361	4-cc	mei-P26	FBgn0026206	Ubiquitin-related
362	4-cc	Mis12	FBgn0035725	None
363	4-cc	mnb	FBgn0259168	Kinases	Protein Kinase
364	4-cc	msd1	FBgn0035209	None
365	4-cc	msd5	FBgn0035210	None
366	4-cc	mt:lrRNA	FBgn0013686	None
367	4-cc	NaCP60E	FBgn0085434	Trans-membrane proteins
368	4-cc	NaCP60E	FBgn0085434	Transporters	Ion Channels	The Voltage-gated Ion Channel (VIC) Superfamily
369	4-cc	NaCP60E	FBgn0085434	Ion channel		Y
370	4-cc	NaPi-III	FBgn0260795	Trans-membrane proteins
371	4-cc	NaPi-III	FBgn0260795	Transporters	Secondary Transporter	The Inorganic Phosphate Transporter (PiT) Family
372	4-cc	ncd	FBgn0002924	Cytoskeletal
373	4-cc	Ndc80	FBgn0030500	None
374	4-cc	Nrt	FBgn0004108	Trans-membrane proteins
375	4-cc	Nse1	FBgn0031848	None
376	4-cc	Orc1	FBgn0286788	None
377	4-cc	PCNA	FBgn0005655	Metabolic	enzyme
378	4-cc	PCNA	FBgn0005655	Metabolic vs2
379	4-cc	Pka-C1	FBgn0000273	Cytoskeletal
380	4-cc	Pka-C1	FBgn0000273	Kinases	Protein Kinase
381	4-cc	Pka-C1	FBgn0000273	Metabolic vs2
382	4-cc	psq	FBgn0263102	Transcription factor/DNA binding	DNA-binding with transcription factor activity	HTH_psq		TFscore=5
383	4-cc	psq	FBgn0263102	Ubiquitin-related
384	4-cc	Pur-alpha	FBgn0022361	Transcription factor/DNA binding	DNA-binding with transcription factor activity		High
385	4-cc	Rab27	FBgn0025382	Human Disease	HuDis670
386	4-cc	rad50	FBgn0034728	Metabolic vs2
387	4-cc	Rbfox1	FBgn0052062	RNA-binding
388	4-cc	Reep1	FBgn0261564	Trans-membrane proteins
389	4-cc	RfC38	FBgn0028700	None
390	4-cc	RfC4	FBgn0260985	None
391	4-cc	RnrL	FBgn0011703	Metabolic	enzyme
392	4-cc	RnrL	FBgn0011703	Metabolic vs2
393	4-cc	RnrS	FBgn0011704	Metabolic	enzyme
394	4-cc	RnrS	FBgn0011704	Trans-membrane proteins
395	4-cc	RnrS	FBgn0011704	Metabolic vs2
396	4-cc	RPA2	FBgn0032906	None
397	4-cc	Rrp1	FBgn0004584	Phosphatases	Non-protein Phosphatase
398	4-cc	scramb1	FBgn0052056	None
399	4-cc	Sirup	FBgn0031971	None
400	4-cc	Skp2	FBgn0037236	Ubiquitin-related
401	4-cc	Slbp	FBgn0041186	RNA-binding
402	4-cc	SMC1	FBgn0040283	Autophagy-related
403	4-cc	SMC1	FBgn0040283	Human Disease	HuDis670
404	4-cc	spi	FBgn0005672	Major signaling pathways	EGFR and PVR RTK signaling pathway	ligand
405	4-cc	spi	FBgn0005672	Secreted proteins
406	4-cc	spi	FBgn0005672	Trans-membrane proteins
407	4-cc	spi	FBgn0005672	Matrisome	Homologs/Orthologs to Mammalian Matrisome-Associated Genes	Secreted Factors		EGFR Ligand
408	4-cc	Src64B	FBgn0262733	Cytoskeletal
409	4-cc	Src64B	FBgn0262733	Kinases	Protein Kinase
410	4-cc	Src64B	FBgn0262733	Major signaling pathways	EGFR and PVR RTK signaling pathway	other
411	4-cc	Src64B	FBgn0262733	Major signaling pathways	TNF alpha signaling pathway	other
412	4-cc	Ssb-c31a	FBgn0015299	Transcription factor/DNA binding	DNA-binding with transcription factor activity		High
413	4-cc	sti	FBgn0002466	Cytoskeletal
414	4-cc	sti	FBgn0002466	Kinases	Protein Kinase
415	4-cc	Syx13	FBgn0036341	Receptors
416	4-cc	Syx13	FBgn0036341	Trans-membrane proteins
417	4-cc	Tapdelta	FBgn0021795	Mitochondrial
418	4-cc	Tapdelta	FBgn0021795	Receptors
419	4-cc	Tapdelta	FBgn0021795	Trans-membrane proteins
420	4-cc	TfIIA-S	FBgn0013347	Transcription factor/DNA binding	DNA-binding with transcription factor activity
421	4-cc	Top2	FBgn0284220	None
422	4-cc	trsn	FBgn0033528	Trans-membrane proteins
423	4-cc	Ts	FBgn0024920	Metabolic	enzyme
424	4-cc	Ts	FBgn0024920	Metabolic vs2
425	4-cc	Tsp39D	FBgn0032943	Glycoproteins
426	4-cc	Tsp39D	FBgn0032943	Receptors
427	4-cc	Tsp39D	FBgn0032943	Trans-membrane proteins
428	4-cc	Ubi-p5E	FBgn0086558	Mitochondrial
429	4-cc	X11Lbeta	FBgn0052677	None
430	8-cc	5.8SrRNA-Psi:CR45863	FBgn0267523	None
431	8-cc	Acf	FBgn0027620	Transcription factor/DNA binding	DNA-binding with transcription factor activity		High
432	8-cc	Acf	FBgn0027620	Ubiquitin-related
433	8-cc	Act42A	FBgn0000043	Cytoskeletal
434	8-cc	alphaTub84B	FBgn0003884	Cytoskeletal
435	8-cc	alphaTub84B	FBgn0003884	Mitochondrial
436	8-cc	Ant2	FBgn0025111	Mitochondrial
437	8-cc	Ant2	FBgn0025111	Trans-membrane proteins
438	8-cc	Ant2	FBgn0025111	Transporters	Secondary Transporter	The Mitochondrial Carrier (MC) Family
439	8-cc	Ant2	FBgn0025111	Metabolic vs2
440	8-cc	asf1	FBgn0029094	Spliceosome
441	8-cc	aurB	FBgn0024227	Cytoskeletal
442	8-cc	aurB	FBgn0024227	Kinases	Protein Kinase
443	8-cc	Bacc	FBgn0031453	None
444	8-cc	baf	FBgn0031977	Human Disease	HuDis670
445	8-cc	ball	FBgn0027889	Human Disease	HuDis670
446	8-cc	ball	FBgn0027889	Kinases	Protein Kinase
447	8-cc	bam	FBgn0000158	None
448	8-cc	betaTub56D	FBgn0284243	None
449	8-cc	Bgb	FBgn0013753	Human Disease	HuDis670
450	8-cc	Bgb	FBgn0013753	Transcription factor/DNA binding	Co-factor	CBF-beta		TFscore=NA
451	8-cc	BicD	FBgn0000183	Cytoskeletal
452	8-cc	BicD	FBgn0000183	RNA-binding
453	8-cc	blanks	FBgn0035608	RNA-binding
454	8-cc	borr	FBgn0032105	Cytoskeletal
455	8-cc	Bsg	FBgn0261822	Cytoskeletal
456	8-cc	Bsg	FBgn0261822	Mitochondrial
457	8-cc	Bsg	FBgn0261822	Trans-membrane proteins
458	8-cc	c(3)G	FBgn0000246	None
459	8-cc	Caf1-180	FBgn0030054	None
460	8-cc	Cap-D2	FBgn0039680	None
461	8-cc	Cdc6	FBgn0035918	Human Disease	HuDis670
462	8-cc	Cenp-C	FBgn0266916	Transcription factor/DNA binding	DNA-binding with transcription factor activity	AT_hook		TFscore=NA
463	8-cc	CG10326	FBgn0038453	Trans-membrane proteins
464	8-cc	CG10326	FBgn0038453	Conserved in bilaterians/lost in nematodes
465	8-cc	CG10336	FBgn0032698	None
466	8-cc	CG11885	FBgn0031253	None
467	8-cc	CG13029	FBgn0036670	Trans-membrane proteins
468	8-cc	CG13540	FBgn0034839	None
469	8-cc	CG14561	FBgn0037149	None
470	8-cc	CG14932	FBgn0032375	None
471	8-cc	CG17574	FBgn0033777	Trans-membrane proteins
472	8-cc	CG1888	FBgn0033421	None
473	8-cc	CG1943	FBgn0037468	None
474	8-cc	CG31125	FBgn0051125	None
475	8-cc	CG32280	FBgn0052280	Trans-membrane proteins
476	8-cc	CG34323	FBgn0085352	None
477	8-cc	CG42232	FBgn0250754	Transcription factor/DNA binding	Maybe TF
478	8-cc	CG43427	FBgn0263346	None
479	8-cc	CG43736	FBgn0263993	None
480	8-cc	CG44774	FBgn0266000	None
481	8-cc	CG45050	FBgn0266410	Transcription factor/DNA binding	DNA-binding with transcription factor activity		Medium
482	8-cc	CG4949	FBgn0030813	None
483	8-cc	CG5194	FBgn0035955	None
484	8-cc	CG5885	FBgn0025700	Trans-membrane proteins
485	8-cc	CG6540	FBgn0030943	None
486	8-cc	CG6693	FBgn0037878	Chaperone and heat shock proteins
487	8-cc	CG7154	FBgn0031947	None
488	8-cc	CG7372	FBgn0036522	Transcription factor/DNA binding	DNA-binding with transcription factor activity	zf-C2H2	Medium	TFscore=6
489	8-cc	CG7593	FBgn0039687	None
490	8-cc	CG8223	FBgn0037624	None
491	8-cc	CG8289	FBgn0030854	None
492	8-cc	CG8300	FBgn0029937	None
493	8-cc	CG8490	FBgn0033715	None
494	8-cc	CG9135	FBgn0031769	None
495	8-cc	CG9272	FBgn0032907	None
496	8-cc	CG9705	FBgn0036661	RNA-binding
497	8-cc	CG9705	FBgn0036661	Transcription factor/DNA binding	DNA-binding with transcription factor activity		Medium
498	8-cc	CG9705	FBgn0036661	Conserved in bilaterians/lost in nematodes
499	8-cc	CG9925	FBgn0038191	None
500	8-cc	chinmo	FBgn0086758	Transcription factor/DNA binding	DNA-binding with transcription factor activity	zf-C2H2	Medium	TFscore=6
501	8-cc	chinmo	FBgn0086758	Ubiquitin-related
502	8-cc	Chrac-14	FBgn0043002	Metabolic	other
503	8-cc	Chrac-14	FBgn0043002	Ubiquitin-related
504	8-cc	Chrac-14	FBgn0043002	Metabolic vs2
505	8-cc	Chrac-16	FBgn0043001	None
506	8-cc	Cks30A	FBgn0010314	Kinases	Protein Kinase
507	8-cc	Claspin	FBgn0052251	None
508	8-cc	cmet	FBgn0040232	Cytoskeletal
509	8-cc	cona	FBgn0038612	None
510	8-cc	corolla	FBgn0267967	None
511	8-cc	CR31044	FBgn0051044	None
512	8-cc	CR42862	FBgn0262109	None
513	8-cc	CR43264	FBgn0262945	None
514	8-cc	CR43651	FBgn0263660	None
515	8-cc	CR43857	FBgn0264439	None
516	8-cc	CtBP	FBgn0020496	Transcription factor/DNA binding	Co-factor
517	8-cc	CtsB1	FBgn0030521	Mitochondrial
518	8-cc	CtsB1	FBgn0030521	Matrisome	Homologs/Orthologs to Mammalian Matrisome-Associated Genes	ECM Regulators		Cathepsin
519	8-cc	CycA	FBgn0000404	None
520	8-cc	D1	FBgn0000412	Transcription factor/DNA binding	DNA-binding with transcription factor activity	AT_hook	High	TFscore=5
521	8-cc	Det	FBgn0264291	None
522	8-cc	Df31	FBgn0022893	Transcription factor/DNA binding	Chromatin regulation
523	8-cc	dgt4	FBgn0026085	None
524	8-cc	dnk	FBgn0022338	Human Disease	HuDis670
525	8-cc	dnk	FBgn0022338	Kinases	Non-protein Kinase
526	8-cc	dnk	FBgn0022338	Metabolic	enzyme
527	8-cc	dnk	FBgn0022338	Conserved in bilaterians/lost in nematodes
528	8-cc	dnk	FBgn0022338	Metabolic vs2
529	8-cc	dpa	FBgn0015929	None
530	8-cc	Drep2	FBgn0028408	None
531	8-cc	dup	FBgn0000996	Human Disease	HuDis670
532	8-cc	E(spl)m2-BFM	FBgn0002592	Major signaling pathways	NOTCH signaling pathway	TF
533	8-cc	E(spl)m7-HLH	FBgn0002633	Major signaling pathways	NOTCH signaling pathway	TF
534	8-cc	E(spl)m7-HLH	FBgn0002633	Transcription factor/DNA binding	DNA-binding with transcription factor activity	HLH	High	TFscore=3
535	8-cc	E(spl)m8-HLH	FBgn0000591	Major signaling pathways	NOTCH signaling pathway	TF
536	8-cc	E(spl)m8-HLH	FBgn0000591	Transcription factor/DNA binding	DNA-binding with transcription factor activity	HLH	High	TFscore=5
537	8-cc	E(spl)mbeta-HLH	FBgn0002733	Major signaling pathways	NOTCH signaling pathway	TF
538	8-cc	E(spl)mbeta-HLH	FBgn0002733	Transcription factor/DNA binding	DNA-binding with transcription factor activity	HLH	Medium	TFscore=6
539	8-cc	E(spl)mgamma-HLH	FBgn0002735	Major signaling pathways	NOTCH signaling pathway	TF
540	8-cc	E(spl)mgamma-HLH	FBgn0002735	Transcription factor/DNA binding	DNA-binding with transcription factor activity	HLH	High	TFscore=2
541	8-cc	ed	FBgn0000547	Cytoskeletal
542	8-cc	ed	FBgn0000547	Glycoproteins
543	8-cc	ed	FBgn0000547	Trans-membrane proteins
544	8-cc	egg	FBgn0086908	Transcription factor/DNA binding	DNA-binding with transcription factor activity		Medium
545	8-cc	egg	FBgn0086908	Methyltransferase				Source: GO and domain annotation
546	8-cc	enc	FBgn0004875	None
547	8-cc	ERp60	FBgn0033663	Chaperone and heat shock proteins
548	8-cc	ERp60	FBgn0033663	Metabolic	enzyme
549	8-cc	ERp60	FBgn0033663	Mitochondrial
550	8-cc	ERp60	FBgn0033663	Metabolic vs2
551	8-cc	Fas1	FBgn0285925	None
552	8-cc	Fas2	FBgn0000635	Trans-membrane proteins
553	8-cc	fzy	FBgn0001086	None
554	8-cc	Gbeta13F	FBgn0001105	Mitochondrial
555	8-cc	glu	FBgn0015391	Cytoskeletal
556	8-cc	glu	FBgn0015391	Transcription factor/DNA binding	DNA-binding with transcription factor activity
557	8-cc	Gnf1	FBgn0004913	None
558	8-cc	hdm	FBgn0029977	Conserved in bilaterians/lost in nematodes
559	8-cc	heph	FBgn0011224	Cytoskeletal
560	8-cc	heph	FBgn0011224	RNA-binding
561	8-cc	heph	FBgn0011224	Spliceosome
562	8-cc	HipHop	FBgn0036815	None
563	8-cc	Hipk	FBgn0035142	Kinases	Protein Kinase
564	8-cc	His2Av	FBgn0001197	Mitochondrial
565	8-cc	HmgD	FBgn0004362	Transcription factor/DNA binding	DNA-binding with transcription factor activity	HMG_box	Medium	TFscore=6
566	8-cc	HmgZ	FBgn0010228	Transcription factor/DNA binding	DNA-binding with transcription factor activity	HMG_box	Medium	TFscore=6
567	8-cc	HP6	FBgn0031613	Transcription factor/DNA binding	DNA-binding with transcription factor activity
568	8-cc	hrg	FBgn0015949	RNA-binding
569	8-cc	hrg	FBgn0015949	Spliceosome
570	8-cc	hrg	FBgn0015949	Transcription factor/DNA binding	Maybe TF
571	8-cc	Hsp23	FBgn0001224	Chaperone and heat shock proteins
572	8-cc	Hsp23	FBgn0001224	Cytoskeletal
573	8-cc	Hsp26	FBgn0001225	Chaperone and heat shock proteins
574	8-cc	Hsp27	FBgn0001226	Chaperone and heat shock proteins
575	8-cc	Hsp83	FBgn0001233	Chaperone and heat shock proteins
576	8-cc	Hsp83	FBgn0001233	Mitochondrial
577	8-cc	Hsp83	FBgn0001233	Metabolic vs2
578	8-cc	Incenp	FBgn0260991	None
579	8-cc	jumu	FBgn0015396	Transcription factor/DNA binding	DNA-binding with transcription factor activity	Fork_head	Medium	TFscore=6
580	8-cc	Jupiter	FBgn0051363	Cytoskeletal
581	8-cc	krimp	FBgn0034098	RNA-binding
582	8-cc	kuk	FBgn0038476	None
583	8-cc	kuz	FBgn0259984	Major signaling pathways	NOTCH signaling pathway	other
584	8-cc	kuz	FBgn0259984	Trans-membrane proteins
585	8-cc	kuz	FBgn0259984	Matrisome	Homologs/Orthologs to Mammalian Matrisome-Associated Genes	ECM Regulators		ADAM
586	8-cc	l(2)k09913	FBgn0021979	Mitochondrial
587	8-cc	l(2)k09913	FBgn0021979	Peroxisomal
588	8-cc	l(2)k09913	FBgn0021979	Trans-membrane proteins
589	8-cc	l(3)L1231	FBgn0086686	Trans-membrane proteins
590	8-cc	Lam	FBgn0002525	Cytoskeletal
591	8-cc	Lam	FBgn0002525	Human Disease	HuDis670
592	8-cc	Lam	FBgn0002525	Mitochondrial
593	8-cc	LanB1	FBgn0261800	Human Disease	HuDis670
594	8-cc	LanB1	FBgn0261800	Secreted proteins
595	8-cc	LanB1	FBgn0261800	Matrisome	Homologs/Orthologs to Mammalian Core Matrisome Genes	ECM Glycoproteins		Basement Membrane; Laminin
596	8-cc	mad2	FBgn0035640	None
597	8-cc	mahe	FBgn0029979	RNA-binding
598	8-cc	Mcm3	FBgn0284442	None
599	8-cc	Mcm7	FBgn0020633	None
600	8-cc	Mcr	FBgn0267488	Glycoproteins
601	8-cc	Mcr	FBgn0267488	Secreted proteins
602	8-cc	Mcr	FBgn0267488	Trans-membrane proteins
603	8-cc	mei-P26	FBgn0026206	Transcription factor/DNA binding	Maybe TF
604	8-cc	mei-P26	FBgn0026206	Ubiquitin-related
605	8-cc	Mink	FBgn0039250	None
606	8-cc	Mis12	FBgn0035725	None
607	8-cc	mnb	FBgn0259168	Kinases	Protein Kinase
608	8-cc	msd1	FBgn0035209	None
609	8-cc	msd5	FBgn0035210	None
610	8-cc	msps	FBgn0027948	Cytoskeletal
611	8-cc	mub	FBgn0262737	RNA-binding
612	8-cc	mub	FBgn0262737	Spliceosome
613	8-cc	mxc	FBgn0260789	RNA-binding
614	8-cc	mxc	FBgn0260789	Transcription factor/DNA binding	DNA-binding with transcription factor activity	AT_hook	Medium	TFscore=6
615	8-cc	ncd	FBgn0002924	Cytoskeletal
616	8-cc	Ndc80	FBgn0030500	None
617	8-cc	nmo	FBgn0011817	Kinases	Protein Kinase
618	8-cc	nmo	FBgn0011817	Major signaling pathways	Circadian Clock pathway	NCore
619	8-cc	Nrt	FBgn0004108	Trans-membrane proteins
620	8-cc	Nse1	FBgn0031848	None
621	8-cc	nudE	FBgn0036059	Cytoskeletal
622	8-cc	Ote	FBgn0266420	Cytoskeletal
623	8-cc	Ote	FBgn0266420	Trans-membrane proteins
624	8-cc	Oxp	FBgn0034255	None
625	8-cc	p120ctn	FBgn0260799	None
626	8-cc	Pa1	FBgn0030294	None
627	8-cc	pav	FBgn0011692	Cytoskeletal
628	8-cc	pav	FBgn0011692	Peroxisomal
629	8-cc	Pcl	FBgn0003044	Transcription factor/DNA binding	DNA-binding with transcription factor activity
630	8-cc	Pcl	FBgn0003044	Conserved in bilaterians/lost in nematodes
631	8-cc	PCNA	FBgn0005655	Metabolic	enzyme
632	8-cc	PCNA	FBgn0005655	Metabolic vs2
633	8-cc	pim	FBgn0003087	Metabolic	other
634	8-cc	pim	FBgn0003087	Metabolic vs2
635	8-cc	Pka-C1	FBgn0000273	Cytoskeletal
636	8-cc	Pka-C1	FBgn0000273	Kinases	Protein Kinase
637	8-cc	Pka-C1	FBgn0000273	Metabolic vs2
638	8-cc	PMP34	FBgn0052250	Metabolic	other
639	8-cc	PMP34	FBgn0052250	Peroxisomal
640	8-cc	PMP34	FBgn0052250	Trans-membrane proteins
641	8-cc	PMP34	FBgn0052250	Transporters	Secondary Transporter	The Mitochondrial Carrier (MC) Family
642	8-cc	PMP34	FBgn0052250	Metabolic vs2
643	8-cc	Poc1	FBgn0036354	None
644	8-cc	polo	FBgn0003124	Autophagy-related
645	8-cc	polo	FBgn0003124	Kinases	Protein Kinase
646	8-cc	qin	FBgn0263974	Conserved in bilaterians/lost in nematodes
647	8-cc	Rbfox1	FBgn0052062	RNA-binding
648	8-cc	Rcd-1	FBgn0031047	None
649	8-cc	RfC38	FBgn0028700	None
650	8-cc	RhoGEF4	FBgn0035761	None
651	8-cc	RNASEK	FBgn0262116	Trans-membrane proteins
652	8-cc	RnrL	FBgn0011703	Metabolic	enzyme
653	8-cc	RnrL	FBgn0011703	Metabolic vs2
654	8-cc	RnrS	FBgn0011704	Metabolic	enzyme
655	8-cc	RnrS	FBgn0011704	Trans-membrane proteins
656	8-cc	RnrS	FBgn0011704	Metabolic vs2
657	8-cc	RPA2	FBgn0032906	None
658	8-cc	RpS10a	FBgn0027494	Ribosome
659	8-cc	Rrp1	FBgn0004584	Phosphatases	Non-protein Phosphatase
660	8-cc	scra	FBgn0261385	Cytoskeletal
661	8-cc	Sec61alpha	FBgn0086357	Autophagy-related
662	8-cc	Sec61alpha	FBgn0086357	Trans-membrane proteins
663	8-cc	Sec61alpha	FBgn0086357	Transporters	ATP-Dependent	The Type II (General) Secretory Pathway (IISP) Family
664	8-cc	Sec61beta	FBgn0010638	Trans-membrane proteins
665	8-cc	SMC1	FBgn0040283	Autophagy-related
666	8-cc	SMC1	FBgn0040283	Human Disease	HuDis670
667	8-cc	SMC2	FBgn0027783	None
668	8-cc	Smn	FBgn0036641	RNA-binding
669	8-cc	Smn	FBgn0036641	Spliceosome
670	8-cc	Spc105R	FBgn0037025	None
671	8-cc	sti	FBgn0002466	Cytoskeletal
672	8-cc	sti	FBgn0002466	Kinases	Protein Kinase
673	8-cc	Tapdelta	FBgn0021795	Mitochondrial
674	8-cc	Tapdelta	FBgn0021795	Receptors
675	8-cc	Tapdelta	FBgn0021795	Trans-membrane proteins
676	8-cc	TfIIA-S	FBgn0013347	Transcription factor/DNA binding	DNA-binding with transcription factor activity
677	8-cc	Tm1	FBgn0003721	Cytoskeletal
678	8-cc	Tm1	FBgn0003721	Mitochondrial
679	8-cc	Top2	FBgn0284220	None
680	8-cc	trsn	FBgn0033528	Trans-membrane proteins
681	8-cc	Tsp39D	FBgn0032943	Glycoproteins
682	8-cc	Tsp39D	FBgn0032943	Receptors
683	8-cc	Tsp39D	FBgn0032943	Trans-membrane proteins
684	8-cc	Ubi-p63E	FBgn0003943	Ubiquitin-related
685	8-cc	unc-119	FBgn0025549	Human Disease	HuDis670
686	8-cc	unc-13	FBgn0025726	None
687	8-cc	wap	FBgn0266848	None
688	16-cc 2a I	Acer	FBgn0016122	Secreted proteins
689	16-cc 2a I	Act5C	FBgn0000042	Cytoskeletal
690	16-cc 2a I	Act5C	FBgn0000042	Mitochondrial
691	16-cc 2a I	agt	FBgn0024912	Methyltransferase				Source: GO and domain annotation
692	16-cc 2a I	Akap200	FBgn0027932	None
693	16-cc 2a I	Argk	FBgn0000116	Kinases	Non-protein Kinase
694	16-cc 2a I	Argk	FBgn0000116	Metabolic	enzyme
695	16-cc 2a I	Argk	FBgn0000116	Mitochondrial
696	16-cc 2a I	Argk	FBgn0000116	Metabolic vs2
697	16-cc 2a I	Asph	FBgn0034075	Trans-membrane proteins
698	16-cc 2a I	Bacc	FBgn0031453	None
699	16-cc 2a I	baf	FBgn0031977	Human Disease	HuDis670
700	16-cc 2a I	ball	FBgn0027889	Human Disease	HuDis670
701	16-cc 2a I	ball	FBgn0027889	Kinases	Protein Kinase
702	16-cc 2a I	baz	FBgn0000163	Cytoskeletal
703	16-cc 2a I	bun	FBgn0259176	Transcription factor/DNA binding	DNA-binding with transcription factor activity	TSC22		TFscore=NA
704	16-cc 2a I	Bx	FBgn0265598	Transcription factor/DNA binding	Maybe TF
705	16-cc 2a I	c(3)G	FBgn0000246	None
706	16-cc 2a I	cathD	FBgn0029093	Glycoproteins
707	16-cc 2a I	cathD	FBgn0029093	Human Disease	HuDis670
708	16-cc 2a I	cathD	FBgn0029093	Mitochondrial
709	16-cc 2a I	cathD	FBgn0029093	Matrisome	Homologs/Orthologs to Mammalian Matrisome-Associated Genes	ECM Regulators		Cathepsin
710	16-cc 2a I	CG10151	FBgn0033960	None
711	16-cc 2a I	CG10880	FBgn0031398	Trans-membrane proteins
712	16-cc 2a I	CG11200	FBgn0034500	Trans-membrane proteins
713	16-cc 2a I	CG11200	FBgn0034500	Metabolic vs2
714	16-cc 2a I	CG11658	FBgn0036196	None
715	16-cc 2a I	CG12065	FBgn0030052	Metabolic	other
716	16-cc 2a I	CG12065	FBgn0030052	Metabolic vs2
717	16-cc 2a I	CG12163	FBgn0260462	Glycoproteins
718	16-cc 2a I	CG12163	FBgn0260462	Mitochondrial
719	16-cc 2a I	CG12200	FBgn0031018	None
720	16-cc 2a I	CG12576	FBgn0031190	Trans-membrane proteins
721	16-cc 2a I	CG12608	FBgn0030630	None
722	16-cc 2a I	CG13949	FBgn0031288	None
723	16-cc 2a I	CG14464	FBgn0033000	Conserved in bilaterians/lost in nematodes
724	16-cc 2a I	CG14657	FBgn0037282	None
725	16-cc 2a I	CG14814	FBgn0023515	None
726	16-cc 2a I	CG14864	FBgn0038311	None
727	16-cc 2a I	CG14932	FBgn0032375	None
728	16-cc 2a I	CG15628	FBgn0031632	None
729	16-cc 2a I	CG15891	FBgn0029860	None
730	16-cc 2a I	CG1890	FBgn0039869	Chaperone and heat shock proteins
731	16-cc 2a I	CG1943	FBgn0037468	None
732	16-cc 2a I	CG2017	FBgn0037391	None
733	16-cc 2a I	CG30001	FBgn0050001	None
734	16-cc 2a I	CG31053	FBgn0051053	None
735	16-cc 2a I	CG31125	FBgn0051125	None
736	16-cc 2a I	CG3176	FBgn0029524	None
737	16-cc 2a I	CG31898	FBgn0051898	None
738	16-cc 2a I	CG32486	FBgn0266918	None
739	16-cc 2a I	CG33169	FBgn0053169	Trans-membrane proteins
740	16-cc 2a I	CG34008	FBgn0054008	None
741	16-cc 2a I	CG34323	FBgn0085352	None
742	16-cc 2a I	CG3655	FBgn0040397	Trans-membrane proteins
743	16-cc 2a I	CG3726	FBgn0029824	Transcription factor/DNA binding	DNA-binding with transcription factor activity	AT_hook|HTH_psq_like	Medium	TFscore=6
744	16-cc 2a I	CG3726	FBgn0029824	Ubiquitin-related
745	16-cc 2a I	CG4210	FBgn0038302	Metabolic vs2
746	16-cc 2a I	CG42260	FBgn0259145	Trans-membrane proteins
747	16-cc 2a I	CG42260	FBgn0259145	Transporters	Ion Channels	The Voltage-gated Ion Channel (VIC) Superfamily
748	16-cc 2a I	CG42260	FBgn0259145	Ion channel		Y
749	16-cc 2a I	CG42336	FBgn0259238	Trans-membrane proteins
750	16-cc 2a I	CG42342	FBgn0259244	Trans-membrane proteins
751	16-cc 2a I	CG42342	FBgn0259244	Matrisome	Drosophila Matrisome Genes	ECM-affiliated		Collagen-domain-containing Proteins
752	16-cc 2a I	CG43062	FBgn0262364	None
753	16-cc 2a I	CG43191	FBgn0262820	None
754	16-cc 2a I	CG44774	FBgn0266000	None
755	16-cc 2a I	CG4502	FBgn0031896	Ubiquitin-related
756	16-cc 2a I	CG5059	FBgn0037007	Trans-membrane proteins
757	16-cc 2a I	CG5149	FBgn0031904	None
758	16-cc 2a I	CG5281	FBgn0037902	Trans-membrane proteins
759	16-cc 2a I	CG5281	FBgn0037902	Transporters	Secondary Transporter	The Drug/Metabolite Transporter (DMT) Superfamily
760	16-cc 2a I	CG6329	FBgn0033872	None
761	16-cc 2a I	CG6693	FBgn0037878	Chaperone and heat shock proteins
762	16-cc 2a I	CG6770	FBgn0032400	None
763	16-cc 2a I	CG7154	FBgn0031947	None
764	16-cc 2a I	CG7379	FBgn0038546	Ubiquitin-related
765	16-cc 2a I	CG7945	FBgn0036505	Chaperone and heat shock proteins
766	16-cc 2a I	CG8097	FBgn0030660	Metabolic vs2
767	16-cc 2a I	CG8300	FBgn0029937	None
768	16-cc 2a I	CG8490	FBgn0033715	None
769	16-cc 2a I	CG9123	FBgn0030629	None
770	16-cc 2a I	CG9821	Dmel	None
771	16-cc 2a I	CG9921	FBgn0030743	Mitochondrial
772	16-cc 2a I	CG9921	FBgn0030743	Trans-membrane proteins
773	16-cc 2a I	CHMP2B	FBgn0035589	Human Disease	HuDis670
774	16-cc 2a I	chn	FBgn0015371	Transcription factor/DNA binding	DNA-binding with transcription factor activity	zf-C2H2	High	TFscore=1
775	16-cc 2a I	Cks85A	FBgn0037613	None
776	16-cc 2a I	cona	FBgn0038612	None
777	16-cc 2a I	CR32027	FBgn0052027	None
778	16-cc 2a I	CR42862	FBgn0262109	None
779	16-cc 2a I	CR43836	FBgn0264384	None
780	16-cc 2a I	CR44292	FBgn0265338	None
781	16-cc 2a I	CR44417	FBgn0265590	None
782	16-cc 2a I	CR45667	FBgn0267227	None
783	16-cc 2a I	crq	FBgn0015924	Metabolic	other
784	16-cc 2a I	crq	FBgn0015924	Receptors
785	16-cc 2a I	crq	FBgn0015924	Trans-membrane proteins
786	16-cc 2a I	crq	FBgn0015924	Metabolic vs2
787	16-cc 2a I	CtBP	FBgn0020496	Transcription factor/DNA binding	Co-factor
788	16-cc 2a I	Dsp1	FBgn0278608	Major signaling pathways	Imd pathway
789	16-cc 2a I	Dsp1	FBgn0278608	Transcription factor/DNA binding	DNA-binding with transcription factor activity	HMG_box	High	TFscore=5
790	16-cc 2a I	E(spl)m3-HLH	FBgn0002609	Major signaling pathways	NOTCH signaling pathway	TF
791	16-cc 2a I	E(spl)m3-HLH	FBgn0002609	Transcription factor/DNA binding	DNA-binding with transcription factor activity	HLH	High	TFscore=5
792	16-cc 2a I	eag	FBgn0000535	Trans-membrane proteins
793	16-cc 2a I	eag	FBgn0000535	Transporters	Ion Channels	The Voltage-gated Ion Channel (VIC) Superfamily
794	16-cc 2a I	eag	FBgn0000535	Ion channel		Y
795	16-cc 2a I	egg	FBgn0086908	Transcription factor/DNA binding	DNA-binding with transcription factor activity		Medium
796	16-cc 2a I	egg	FBgn0086908	Methyltransferase				Source: GO and domain annotation
797	16-cc 2a I	eIF4G2	FBgn0260634	Metabolic	other
798	16-cc 2a I	eIF4G2	FBgn0260634	RNA-binding
799	16-cc 2a I	eIF4G2	FBgn0260634	Metabolic vs2
800	16-cc 2a I	endos	FBgn0061515	None
801	16-cc 2a I	fal	FBgn0028380	Metabolic	enzyme
802	16-cc 2a I	fal	FBgn0028380	Metabolic vs2
803	16-cc 2a I	feo	FBgn0030241	None
804	16-cc 2a I	gammaTub37C	FBgn0010097	Cytoskeletal
805	16-cc 2a I	GlyS	FBgn0266064	Autophagy-related
806	16-cc 2a I	GlyS	FBgn0266064	Human Disease	HuDis670
807	16-cc 2a I	GlyS	FBgn0266064	Metabolic	other
808	16-cc 2a I	GlyS	FBgn0266064	Metabolic vs2
809	16-cc 2a I	Gp150	FBgn0013272	Glycoproteins
810	16-cc 2a I	Gp150	FBgn0013272	Trans-membrane proteins
811	16-cc 2a I	GstD3	FBgn0010039	Metabolic	enzyme
812	16-cc 2a I	GstD3	FBgn0010039	Metabolic vs2
813	16-cc 2a I	hdc	FBgn0010113	None
814	16-cc 2a I	hdm	FBgn0029977	Conserved in bilaterians/lost in nematodes
815	16-cc 2a I	His3.3B	FBgn0004828	Mitochondrial
816	16-cc 2a I	how	FBgn0264491	RNA-binding
817	16-cc 2a I	how	FBgn0264491	Spliceosome
818	16-cc 2a I	Hr4	FBgn0264562	Major signaling pathways	Nuclear hormone receptor
819	16-cc 2a I	Hr4	FBgn0264562	Receptors
820	16-cc 2a I	Hr4	FBgn0264562	Transcription factor/DNA binding	DNA-binding with transcription factor activity	zf-C4	Medium	TFscore=6
821	16-cc 2a I	Hsp23	FBgn0001224	Chaperone and heat shock proteins
822	16-cc 2a I	Hsp23	FBgn0001224	Cytoskeletal
823	16-cc 2a I	Hsp26	FBgn0001225	Chaperone and heat shock proteins
824	16-cc 2a I	Hsp68	FBgn0001230	Chaperone and heat shock proteins
825	16-cc 2a I	Hsp68	FBgn0001230	Mitochondrial
826	16-cc 2a I	Imp	FBgn0285926	None
827	16-cc 2a I	Klp67A	FBgn0004379	Cytoskeletal
828	16-cc 2a I	l(2)05714	FBgn0010607	None
829	16-cc 2a I	Lam	FBgn0002525	Cytoskeletal
830	16-cc 2a I	Lam	FBgn0002525	Human Disease	HuDis670
831	16-cc 2a I	Lam	FBgn0002525	Mitochondrial
832	16-cc 2a I	Lk6	FBgn0017581	Kinases	Protein Kinase
833	16-cc 2a I	Lk6	FBgn0017581	Metabolic	enzyme
834	16-cc 2a I	Lk6	FBgn0017581	Metabolic vs2
835	16-cc 2a I	Mad	FBgn0011648	Major signaling pathways	TGF beta signaling pathway	TF
836	16-cc 2a I	Mad	FBgn0011648	Receptors
837	16-cc 2a I	Mad	FBgn0011648	Transcription factor/DNA binding	DNA-binding with transcription factor activity	MH1	High	TFscore=1
838	16-cc 2a I	mei-P22	FBgn0016036	None
839	16-cc 2a I	mei-P26	FBgn0026206	Transcription factor/DNA binding	Maybe TF
840	16-cc 2a I	mei-P26	FBgn0026206	Ubiquitin-related
841	16-cc 2a I	Mnt	FBgn0023215	Transcription factor/DNA binding	DNA-binding with transcription factor activity	HLH	Medium	TFscore=6
842	16-cc 2a I	Mnt	FBgn0023215	Conserved in bilaterians/lost in nematodes
843	16-cc 2a I	Mob2	FBgn0259481	None
844	16-cc 2a I	mrj	FBgn0034091	Chaperone and heat shock proteins
845	16-cc 2a I	msd5	FBgn0035210	None
846	16-cc 2a I	Muc14A	FBgn0052580	Trans-membrane proteins
847	16-cc 2a I	Muc14A	FBgn0052580	Matrisome	Homologs/Orthologs to Mammalian Matrisome-Associated Genes	ECM-affiliated		Mucin
848	16-cc 2a I	NaPi-III	FBgn0260795	Trans-membrane proteins
849	16-cc 2a I	NaPi-III	FBgn0260795	Transporters	Secondary Transporter	The Inorganic Phosphate Transporter (PiT) Family
850	16-cc 2a I	Nelf-E	FBgn0017430	RNA-binding
851	16-cc 2a I	Nelf-E	FBgn0017430	Transcription factor/DNA binding	Maybe TF
852	16-cc 2a I	Nelf-E	FBgn0017430	Conserved in bilaterians/lost in nematodes
853	16-cc 2a I	nmo	FBgn0011817	Kinases	Protein Kinase
854	16-cc 2a I	nmo	FBgn0011817	Major signaling pathways	Circadian Clock pathway	NCore
855	16-cc 2a I	Nost	FBgn0259734	None
856	16-cc 2a I	nudE	FBgn0036059	Cytoskeletal
857	16-cc 2a I	Nuf2	FBgn0031886	None
858	16-cc 2a I	Oda	FBgn0014184	Conserved in bilaterians/lost in nematodes
859	16-cc 2a I	ovo	FBgn0003028	Cytoskeletal
860	16-cc 2a I	ovo	FBgn0003028	Transcription factor/DNA binding	DNA-binding with transcription factor activity	zf-C2H2	High	TFscore=1
861	16-cc 2a I	Pa1	FBgn0030294	None
862	16-cc 2a I	Parp	FBgn0010247	Autophagy-related
863	16-cc 2a I	Parp	FBgn0010247	Spliceosome
864	16-cc 2a I	Parp	FBgn0010247	Transcription factor/DNA binding	DNA-binding with transcription factor activity
865	16-cc 2a I	Pka-C1	FBgn0000273	Cytoskeletal
866	16-cc 2a I	Pka-C1	FBgn0000273	Kinases	Protein Kinase
867	16-cc 2a I	Pka-C1	FBgn0000273	Metabolic vs2
868	16-cc 2a I	Prosap	FBgn0040752	None
869	16-cc 2a I	Prosbeta2R2	FBgn0037296	Proteasome
870	16-cc 2a I	Prosbeta2R2	FBgn0037296	Ubiquitin-related
871	16-cc 2a I	psq	FBgn0263102	Transcription factor/DNA binding	DNA-binding with transcription factor activity	HTH_psq		TFscore=5
872	16-cc 2a I	psq	FBgn0263102	Ubiquitin-related
873	16-cc 2a I	Ptpmeg2	FBgn0028341	Phosphatases	Protein Phosphatase
874	16-cc 2a I	Ptpmeg2	FBgn0028341	Trans-membrane proteins
875	16-cc 2a I	Pur-alpha	FBgn0022361	Transcription factor/DNA binding	DNA-binding with transcription factor activity		High
876	16-cc 2a I	qin	FBgn0263974	Conserved in bilaterians/lost in nematodes
877	16-cc 2a I	Rab27	FBgn0025382	Human Disease	HuDis670
878	16-cc 2a I	rad50	FBgn0034728	Metabolic vs2
879	16-cc 2a I	Rbp9	FBgn0010263	RNA-binding
880	16-cc 2a I	Rbp9	FBgn0010263	Spliceosome
881	16-cc 2a I	Rcd-1r	FBgn0032089	None
882	16-cc 2a I	Rcd5	FBgn0263832	None
883	16-cc 2a I	ref(2)P	FBgn0003231	Mitochondrial
884	16-cc 2a I	REPTOR	FBgn0039209	Transcription factor/DNA binding	DNA-binding with transcription factor activity	bZIP	Medium	TFscore=6
885	16-cc 2a I	REPTOR	FBgn0039209	Conserved in bilaterians/lost in nematodes
886	16-cc 2a I	REPTOR-BP	FBgn0032202	Transcription factor/DNA binding	DNA-binding with transcription factor activity	bZIP	Medium	TFscore=6
887	16-cc 2a I	REPTOR-BP	FBgn0032202	Conserved in bilaterians/lost in nematodes
888	16-cc 2a I	RfC4	FBgn0260985	None
889	16-cc 2a I	rhi	FBgn0004400	Transcription factor/DNA binding	Chromatin regulation
890	16-cc 2a I	RPA2	FBgn0032906	None
891	16-cc 2a I	RpS19b	FBgn0039129	Human Disease	HuDis670
892	16-cc 2a I	RpS19b	FBgn0039129	Ribosome
893	16-cc 2a I	rt	FBgn0003292	Human Disease	HuDis670
894	16-cc 2a I	rt	FBgn0003292	Metabolic	enzyme
895	16-cc 2a I	rt	FBgn0003292	Trans-membrane proteins
896	16-cc 2a I	rt	FBgn0003292	Metabolic vs2
897	16-cc 2a I	rudhira	FBgn0266019	None
898	16-cc 2a I	sbb	FBgn0285917	None
899	16-cc 2a I	Sdc	FBgn0010415	Metabolic	other
900	16-cc 2a I	Sdc	FBgn0010415	Receptors
901	16-cc 2a I	Sdc	FBgn0010415	Secreted proteins
902	16-cc 2a I	Sdc	FBgn0010415	Trans-membrane proteins
903	16-cc 2a I	Sdc	FBgn0010415	Metabolic vs2
904	16-cc 2a I	Sdc	FBgn0010415	Matrisome	Homologs/Orthologs to Mammalian Matrisome-Associated Genes	ECM-affiliated		Syndecan
905	16-cc 2a I	Sec61gamma	FBgn0031049	Trans-membrane proteins
906	16-cc 2a I	shep	FBgn0052423	RNA-binding
907	16-cc 2a I	sina	FBgn0003410	None
908	16-cc 2a I	Sirup	FBgn0031971	None
909	16-cc 2a I	SMC1	FBgn0040283	Autophagy-related
910	16-cc 2a I	SMC1	FBgn0040283	Human Disease	HuDis670
911	16-cc 2a I	spi	FBgn0005672	Major signaling pathways	EGFR and PVR RTK signaling pathway	ligand
912	16-cc 2a I	spi	FBgn0005672	Secreted proteins
913	16-cc 2a I	spi	FBgn0005672	Trans-membrane proteins
914	16-cc 2a I	spi	FBgn0005672	Matrisome	Homologs/Orthologs to Mammalian Matrisome-Associated Genes	Secreted Factors		EGFR Ligand
915	16-cc 2a I	spidey	FBgn0029975	Metabolic	enzyme
916	16-cc 2a I	spidey	FBgn0029975	Mitochondrial
917	16-cc 2a I	spidey	FBgn0029975	Trans-membrane proteins
918	16-cc 2a I	spidey	FBgn0029975	Metabolic vs2
919	16-cc 2a I	Spn	FBgn0010905	None
920	16-cc 2a I	Src64B	FBgn0262733	Cytoskeletal
921	16-cc 2a I	Src64B	FBgn0262733	Kinases	Protein Kinase
922	16-cc 2a I	Src64B	FBgn0262733	Major signaling pathways	EGFR and PVR RTK signaling pathway	other
923	16-cc 2a I	Src64B	FBgn0262733	Major signaling pathways	TNF alpha signaling pathway	other
924	16-cc 2a I	Ssb-c31a	FBgn0015299	Transcription factor/DNA binding	DNA-binding with transcription factor activity		High
925	16-cc 2a I	stx	FBgn0052676	Ubiquitin-related
926	16-cc 2a I	stx	FBgn0052676	Conserved in bilaterians/lost in nematodes
927	16-cc 2a I	Swip-1	FBgn0032731	None
928	16-cc 2a I	tacc	FBgn0026620	Conserved in bilaterians/lost in nematodes
929	16-cc 2a I	Tina-1	FBgn0035083	Mitochondrial
930	16-cc 2a I	Top2	FBgn0284220	None
931	16-cc 2a I	Tpi	FBgn0086355	Human Disease	HuDis670
932	16-cc 2a I	Tpi	FBgn0086355	Metabolic	enzyme
933	16-cc 2a I	Tpi	FBgn0086355	Mitochondrial
934	16-cc 2a I	Tpi	FBgn0086355	Metabolic vs2
935	16-cc 2a I	Trf2	FBgn0261793	Transcription factor/DNA binding	DNA-binding with transcription factor activity
936	16-cc 2a I	trsn	FBgn0033528	Trans-membrane proteins
937	16-cc 2a I	Tsp39D	FBgn0032943	Glycoproteins
938	16-cc 2a I	Tsp39D	FBgn0032943	Receptors
939	16-cc 2a I	Tsp39D	FBgn0032943	Trans-membrane proteins
940	16-cc 2a I	UbcE2H	FBgn0029996	Ubiquitin-related
941	16-cc 2a I	Ubi-p5E	FBgn0086558	Mitochondrial
942	16-cc 2a I	Usf	FBgn0029711	Transcription factor/DNA binding	DNA-binding with transcription factor activity	HLH	High	TFscore=5
943	16-cc 2a I	Usf	FBgn0029711	Conserved in bilaterians/lost in nematodes
944	16-cc 2a I	Vha14-1	FBgn0262512	Metabolic	enzyme
945	16-cc 2a I	Vha14-1	FBgn0262512	Transporters	ATP-Dependent	The H+- or Na+-translocating F-type, V-type and A-type ATPase (F-ATPase) Superfamily
946	16-cc 2a I	Vha14-1	FBgn0262512	Metabolic vs2
947	16-cc 2a I	VhaM9.7-a	FBgn0035521	Metabolic	enzyme
948	16-cc 2a I	VhaM9.7-a	FBgn0035521	Trans-membrane proteins
949	16-cc 2a I	VhaM9.7-a	FBgn0035521	Transporters	ATP-Dependent	The H+- or Na+-translocating F-type, V-type and A-type ATPase (F-ATPase) Superfamily
950	16-cc 2a I	VhaM9.7-a	FBgn0035521	Metabolic vs2
951	16-cc 2a I	vilya	FBgn0283545	None
952	16-cc 2a I	vret	FBgn0263143	Metabolic	other
953	16-cc 2a I	vret	FBgn0263143	Metabolic vs2
954	16-cc 2a I	wde	FBgn0027499	Conserved in bilaterians/lost in nematodes
955	16-cc 2a I	X11Lbeta	FBgn0052677	None
956	16-cc 2a I	zpg	FBgn0024177	Trans-membrane proteins
957	16-cc 2a I	zpg	FBgn0024177	Transporters	Ion Channels	The Gap Junction-forming Innexin (Innexin) Family
958	16-cc 2a I	zpg	FBgn0024177	Ion channel		Y
959	16-cc 2a II	Act5C	FBgn0000042	Cytoskeletal
960	16-cc 2a II	Act5C	FBgn0000042	Mitochondrial
961	16-cc 2a II	AGBE	FBgn0053138	Human Disease	HuDis670
962	16-cc 2a II	AGBE	FBgn0053138	Metabolic	enzyme
963	16-cc 2a II	AGBE	FBgn0053138	Metabolic vs2
964	16-cc 2a II	AGO3	FBgn0250816	RNA-binding
965	16-cc 2a II	akirin	FBgn0082598	None
966	16-cc 2a II	Ald	FBgn0000064	Human Disease	HuDis670
967	16-cc 2a II	Ald	FBgn0000064	Metabolic	enzyme
968	16-cc 2a II	Ald	FBgn0000064	Mitochondrial
969	16-cc 2a II	Ald	FBgn0000064	Metabolic vs2
970	16-cc 2a II	aop	FBgn0000097	Major signaling pathways	EGFR and PVR RTK signaling pathway	TF
971	16-cc 2a II	aop	FBgn0000097	Major signaling pathways	FGFR signaling pathway	TF
972	16-cc 2a II	aop	FBgn0000097	Major signaling pathways	TNF alpha signaling pathway	TF
973	16-cc 2a II	aop	FBgn0000097	Transcription factor/DNA binding	DNA-binding with transcription factor activity	Ets	High	TFscore=2
974	16-cc 2a II	aop	FBgn0000097	Conserved in bilaterians/lost in nematodes
975	16-cc 2a II	baz	FBgn0000163	Cytoskeletal
976	16-cc 2a II	bgm	FBgn0027348	Metabolic	enzyme
977	16-cc 2a II	bgm	FBgn0027348	Mitochondrial
978	16-cc 2a II	bgm	FBgn0027348	Metabolic vs2
979	16-cc 2a II	BigH1	FBgn0038252	None
980	16-cc 2a II	bru1	FBgn0000114	RNA-binding
981	16-cc 2a II	bru1	FBgn0000114	Spliceosome
982	16-cc 2a II	Bsg	FBgn0261822	Cytoskeletal
983	16-cc 2a II	Bsg	FBgn0261822	Mitochondrial
984	16-cc 2a II	Bsg	FBgn0261822	Trans-membrane proteins
985	16-cc 2a II	Btk29A	FBgn0003502	Cytoskeletal
986	16-cc 2a II	Btk29A	FBgn0003502	Kinases	Protein Kinase
987	16-cc 2a II	Btk29A	FBgn0003502	Major signaling pathways	TNF alpha signaling pathway	other
988	16-cc 2a II	Btk29A	FBgn0003502	Conserved in bilaterians/lost in nematodes
989	16-cc 2a II	Btk29A	FBgn0003502	Metabolic vs2
990	16-cc 2a II	bun	FBgn0259176	Transcription factor/DNA binding	DNA-binding with transcription factor activity	TSC22		TFscore=NA
991	16-cc 2a II	bves	FBgn0031150	Trans-membrane proteins
992	16-cc 2a II	bves	FBgn0031150	Conserved in bilaterians/lost in nematodes
993	16-cc 2a II	c(3)G	FBgn0000246	None
994	16-cc 2a II	C1GalTA	FBgn0032078	Metabolic	enzyme
995	16-cc 2a II	C1GalTA	FBgn0032078	Trans-membrane proteins
996	16-cc 2a II	C1GalTA	FBgn0032078	Metabolic vs2
997	16-cc 2a II	Ca-alpha1T	FBgn0264386	Trans-membrane proteins
998	16-cc 2a II	Ca-alpha1T	FBgn0264386	Transporters	Ion Channels	The Voltage-gated Ion Channel (VIC) Superfamily
999	16-cc 2a II	Ca-alpha1T	FBgn0264386	Ion channel		Y
1000	16-cc 2a II	Cad87A	FBgn0037963	Glycoproteins
1001	16-cc 2a II	Cad87A	FBgn0037963	Trans-membrane proteins
1002	16-cc 2a II	CanB	FBgn0010014	Phosphatases	Protein Phosphatase
1003	16-cc 2a II	cathD	FBgn0029093	Glycoproteins
1004	16-cc 2a II	cathD	FBgn0029093	Human Disease	HuDis670
1005	16-cc 2a II	cathD	FBgn0029093	Mitochondrial
1006	16-cc 2a II	cathD	FBgn0029093	Matrisome	Homologs/Orthologs to Mammalian Matrisome-Associated Genes	ECM Regulators		Cathepsin
1007	16-cc 2a II	cdi	FBgn0004876	Kinases	Protein Kinase
1008	16-cc 2a II	CG10063	FBgn0035727	Mitochondrial
1009	16-cc 2a II	CG10063	FBgn0035727	Trans-membrane proteins
1010	16-cc 2a II	CG10880	FBgn0031398	Trans-membrane proteins
1011	16-cc 2a II	CG12194	FBgn0031636	Trans-membrane proteins
1012	16-cc 2a II	CG12194	FBgn0031636	Conserved in bilaterians/lost in nematodes
1013	16-cc 2a II	CG12194	FBgn0031636	Metabolic vs2
1014	16-cc 2a II	CG12200	FBgn0031018	None
1015	16-cc 2a II	CG12355	FBgn0040805	Mitochondrial
1016	16-cc 2a II	CG12355	FBgn0040805	Peroxisomal
1017	16-cc 2a II	CG12355	FBgn0040805	Trans-membrane proteins
1018	16-cc 2a II	CG12576	FBgn0031190	Trans-membrane proteins
1019	16-cc 2a II	CG12721	FBgn0030373	None
1020	16-cc 2a II	CG12877	FBgn0039544	None
1021	16-cc 2a II	CG13631	FBgn0040600	None
1022	16-cc 2a II	CG13917	FBgn0035237	Ubiquitin-related
1023	16-cc 2a II	CG13949	FBgn0031288	None
1024	16-cc 2a II	CG14207	FBgn0031037	Chaperone and heat shock proteins
1025	16-cc 2a II	CG14207	FBgn0031037	Mitochondrial
1026	16-cc 2a II	CG14441	FBgn0029895	Transcription factor/DNA binding	DNA-binding with transcription factor activity	zf-C2H2	Medium	TFscore=6
1027	16-cc 2a II	CG14561	FBgn0037149	None
1028	16-cc 2a II	CG14814	FBgn0023515	None
1029	16-cc 2a II	CG14864	FBgn0038311	None
1030	16-cc 2a II	CG14932	FBgn0032375	None
1031	16-cc 2a II	CG15309	FBgn0030183	None
1032	16-cc 2a II	CG15628	FBgn0031632	None
1033	16-cc 2a II	CG17265	FBgn0031488	None
1034	16-cc 2a II	CG17625	FBgn0039002	None
1035	16-cc 2a II	CG17816	FBgn0037525	None
1036	16-cc 2a II	CG17834	FBgn0028394	None
1037	16-cc 2a II	CG18190	FBgn0034403	None
1038	16-cc 2a II	CG1890	FBgn0039869	Chaperone and heat shock proteins
1039	16-cc 2a II	CG1943	FBgn0037468	None
1040	16-cc 2a II	CG2017	FBgn0037391	None
1041	16-cc 2a II	CG2247	FBgn0030320	Ubiquitin-related
1042	16-cc 2a II	CG2678	FBgn0014931	Transcription factor/DNA binding	DNA-binding with transcription factor activity	zf-C2H2	Medium	TFscore=6
1043	16-cc 2a II	CG30389	FBgn0050389	Trans-membrane proteins
1044	16-cc 2a II	CG31808	FBgn0062978	None
1045	16-cc 2a II	CG32264	FBgn0052264	Transcription factor/DNA binding	Maybe TF	RPEL		TFscore=NA
1046	16-cc 2a II	CG32473	FBgn0052473	Trans-membrane proteins
1047	16-cc 2a II	CG32486	FBgn0266918	None
1048	16-cc 2a II	CG32521	FBgn0052521	Trans-membrane proteins
1049	16-cc 2a II	CG32625	FBgn0052625	None
1050	16-cc 2a II	CG32767	FBgn0052767	Transcription factor/DNA binding	DNA-binding with transcription factor activity	zf-C2H2	Medium	TFscore=6
1051	16-cc 2a II	CG33229	FBgn0053229	None
1052	16-cc 2a II	CG33926	FBgn0053926	None
1053	16-cc 2a II	CG34323	FBgn0085352	None
1054	16-cc 2a II	CG3655	FBgn0040397	Trans-membrane proteins
1055	16-cc 2a II	CG3961	FBgn0036821	Metabolic	enzyme
1056	16-cc 2a II	CG3961	FBgn0036821	Mitochondrial
1057	16-cc 2a II	CG3961	FBgn0036821	Peroxisomal
1058	16-cc 2a II	CG3961	FBgn0036821	Trans-membrane proteins
1059	16-cc 2a II	CG3961	FBgn0036821	Metabolic vs2
1060	16-cc 2a II	CG42260	FBgn0259145	Trans-membrane proteins
1061	16-cc 2a II	CG42260	FBgn0259145	Transporters	Ion Channels	The Voltage-gated Ion Channel (VIC) Superfamily
1062	16-cc 2a II	CG42260	FBgn0259145	Ion channel		Y
1063	16-cc 2a II	CG42342	FBgn0259244	Trans-membrane proteins
1064	16-cc 2a II	CG42342	FBgn0259244	Matrisome	Drosophila Matrisome Genes	ECM-affiliated		Collagen-domain-containing Proteins
1065	16-cc 2a II	CG4297	FBgn0031258	None
1066	16-cc 2a II	CG43062	FBgn0262364	None
1067	16-cc 2a II	CG43191	FBgn0262820	None
1068	16-cc 2a II	CG43658	FBgn0263706	Conserved in bilaterians/lost in nematodes
1069	16-cc 2a II	CG4502	FBgn0031896	Ubiquitin-related
1070	16-cc 2a II	CG45050	FBgn0266410	Transcription factor/DNA binding	DNA-binding with transcription factor activity		Medium
1071	16-cc 2a II	CG4860	FBgn0037999	Metabolic	enzyme
1072	16-cc 2a II	CG4860	FBgn0037999	Mitochondrial
1073	16-cc 2a II	CG4860	FBgn0037999	Peroxisomal
1074	16-cc 2a II	CG4860	FBgn0037999	Metabolic vs2
1075	16-cc 2a II	CG5059	FBgn0037007	Trans-membrane proteins
1076	16-cc 2a II	CG5390	FBgn0032213	Conserved in bilaterians/lost in nematodes
1077	16-cc 2a II	CG5946	FBgn0036211	Metabolic	enzyme
1078	16-cc 2a II	CG5946	FBgn0036211	Mitochondrial
1079	16-cc 2a II	CG5946	FBgn0036211	Trans-membrane proteins
1080	16-cc 2a II	CG5946	FBgn0036211	Metabolic vs2
1081	16-cc 2a II	CG6329	FBgn0033872	None
1082	16-cc 2a II	CG6405	FBgn0032428	Conserved in bilaterians/lost in nematodes
1083	16-cc 2a II	CG6770	FBgn0032400	None
1084	16-cc 2a II	CG7154	FBgn0031947	None
1085	16-cc 2a II	CG7504	FBgn0035842	None
1086	16-cc 2a II	CG8034	FBgn0031011	Trans-membrane proteins
1087	16-cc 2a II	CG8034	FBgn0031011	Transporters	Secondary Transporter	The Major Facilitator Superfamily (MFS)
1088	16-cc 2a II	CG8034	FBgn0031011	Metabolic vs2
1089	16-cc 2a II	CG9123	FBgn0030629	None
1090	16-cc 2a II	CG9650	FBgn0029939	Transcription factor/DNA binding	DNA-binding with transcription factor activity	zf-C2H2	Medium	TFscore=6
1091	16-cc 2a II	CG9674	FBgn0036663	Metabolic	enzyme
1092	16-cc 2a II	CG9674	FBgn0036663	Metabolic vs2
1093	16-cc 2a II	CG9821	Dmel	None
1094	16-cc 2a II	CG9921	FBgn0030743	Mitochondrial
1095	16-cc 2a II	CG9921	FBgn0030743	Trans-membrane proteins
1096	16-cc 2a II	chn	FBgn0015371	Transcription factor/DNA binding	DNA-binding with transcription factor activity	zf-C2H2	High	TFscore=1
1097	16-cc 2a II	Cks85A	FBgn0037613	None
1098	16-cc 2a II	cno	FBgn0259212	Major signaling pathways	TNF alpha signaling pathway	other
1099	16-cc 2a II	Corin	FBgn0033192	Receptors
1100	16-cc 2a II	Corin	FBgn0033192	Serine proteases
1101	16-cc 2a II	Corin	FBgn0033192	Trans-membrane proteins
1102	16-cc 2a II	Corp	FBgn0030028	None
1103	16-cc 2a II	CR18854	FBgn0285991	None
1104	16-cc 2a II	CR42862	FBgn0262109	None
1105	16-cc 2a II	CR43144	FBgn0262620	None
1106	16-cc 2a II	CR44417	FBgn0265590	None
1107	16-cc 2a II	CR45667	FBgn0267227	None
1108	16-cc 2a II	Cyp6v1	FBgn0031126	Metabolic	enzyme
1109	16-cc 2a II	Cyp6v1	FBgn0031126	Trans-membrane proteins
1110	16-cc 2a II	Cyp6v1	FBgn0031126	Metabolic vs2
1111	16-cc 2a II	D2hgdh	FBgn0023507	Human Disease	HuDis670
1112	16-cc 2a II	D2hgdh	FBgn0023507	Mitochondrial
1113	16-cc 2a II	D2hgdh	FBgn0023507	Metabolic vs2
1114	16-cc 2a II	dco	FBgn0002413	Kinases	Protein Kinase
1115	16-cc 2a II	dco	FBgn0002413	Major signaling pathways	Circadian Clock pathway	Core
1116	16-cc 2a II	dco	FBgn0002413	Major signaling pathways	HIPPO signaling pathway	other
1117	16-cc 2a II	Dhit	FBgn0028743	None
1118	16-cc 2a II	dl	FBgn0260632	Major signaling pathways	Toll pathway
1119	16-cc 2a II	dl	FBgn0260632	Spliceosome
1120	16-cc 2a II	dl	FBgn0260632	Transcription factor/DNA binding	DNA-binding with transcription factor activity	RHD|TIG	High	TFscore=1
1121	16-cc 2a II	dl	FBgn0260632	Conserved in bilaterians/lost in nematodes
1122	16-cc 2a II	DNApol-eta	FBgn0037141	Human Disease	HuDis670
1123	16-cc 2a II	dnc	FBgn0000479	Human Disease	HuDis670
1124	16-cc 2a II	dnc	FBgn0000479	Metabolic	enzyme
1125	16-cc 2a II	dnc	FBgn0000479	Metabolic vs2
1126	16-cc 2a II	dock	FBgn0010583	Major signaling pathways	EGFR and PVR RTK signaling pathway	other
1127	16-cc 2a II	dock	FBgn0010583	Metabolic	other
1128	16-cc 2a II	dock	FBgn0010583	Metabolic vs2
1129	16-cc 2a II	dpr6	FBgn0040823	None
1130	16-cc 2a II	Dsp1	FBgn0278608	Major signaling pathways	Imd pathway
1131	16-cc 2a II	Dsp1	FBgn0278608	Transcription factor/DNA binding	DNA-binding with transcription factor activity	HMG_box	High	TFscore=5
1132	16-cc 2a II	eag	FBgn0000535	Trans-membrane proteins
1133	16-cc 2a II	eag	FBgn0000535	Transporters	Ion Channels	The Voltage-gated Ion Channel (VIC) Superfamily
1134	16-cc 2a II	eag	FBgn0000535	Ion channel		Y
1135	16-cc 2a II	egg	FBgn0086908	Transcription factor/DNA binding	DNA-binding with transcription factor activity		Medium
1136	16-cc 2a II	egg	FBgn0086908	Methyltransferase				Source: GO and domain annotation
1137	16-cc 2a II	eIF4G2	FBgn0260634	Metabolic	other
1138	16-cc 2a II	eIF4G2	FBgn0260634	RNA-binding
1139	16-cc 2a II	eIF4G2	FBgn0260634	Metabolic vs2
1140	16-cc 2a II	endos	FBgn0061515	None
1141	16-cc 2a II	fal	FBgn0028380	Metabolic	enzyme
1142	16-cc 2a II	fal	FBgn0028380	Metabolic vs2
1143	16-cc 2a II	Fer1HCH	FBgn0015222	Metabolic	enzyme
1144	16-cc 2a II	Fer1HCH	FBgn0015222	Mitochondrial
1145	16-cc 2a II	Fer1HCH	FBgn0015222	Metabolic vs2
1146	16-cc 2a II	Fer2LCH	FBgn0015221	Mitochondrial
1147	16-cc 2a II	Fer2LCH	FBgn0015221	Metabolic vs2
1148	16-cc 2a II	ftz-f1	FBgn0001078	Major signaling pathways	Nuclear hormone receptor
1149	16-cc 2a II	ftz-f1	FBgn0001078	Receptors
1150	16-cc 2a II	ftz-f1	FBgn0001078	Transcription factor/DNA binding	DNA-binding with transcription factor activity	zf-C4	High	TFscore=1
1151	16-cc 2a II	Gapdh2	FBgn0001092	Metabolic	enzyme
1152	16-cc 2a II	Gapdh2	FBgn0001092	Mitochondrial
1153	16-cc 2a II	Gapdh2	FBgn0001092	Metabolic vs2
1154	16-cc 2a II	GLaz	FBgn0033799	Secreted proteins
1155	16-cc 2a II	GLaz	FBgn0033799	Conserved in bilaterians/lost in nematodes
1156	16-cc 2a II	GlyS	FBgn0266064	Autophagy-related
1157	16-cc 2a II	GlyS	FBgn0266064	Human Disease	HuDis670
1158	16-cc 2a II	GlyS	FBgn0266064	Metabolic	other
1159	16-cc 2a II	GlyS	FBgn0266064	Metabolic vs2
1160	16-cc 2a II	gpp	FBgn0264495	Metabolic	other
1161	16-cc 2a II	gpp	FBgn0264495	Methyltransferase				Source: GO annotation
1162	16-cc 2a II	gpp	FBgn0264495	Metabolic vs2
1163	16-cc 2a II	Gsc	FBgn0010323	Transcription factor/DNA binding	DNA-binding with transcription factor activity	Homeobox	High	TFscore=1
1164	16-cc 2a II	GstD3	FBgn0010039	Metabolic	enzyme
1165	16-cc 2a II	GstD3	FBgn0010039	Metabolic vs2
1166	16-cc 2a II	GstE11	FBgn0034354	None
1167	16-cc 2a II	GstO3	FBgn0035904	Autophagy-related
1168	16-cc 2a II	GstO3	FBgn0035904	Metabolic vs2
1169	16-cc 2a II	Hex-A	FBgn0001186	Kinases	Non-protein Kinase
1170	16-cc 2a II	Hex-A	FBgn0001186	Metabolic	enzyme
1171	16-cc 2a II	Hex-A	FBgn0001186	Metabolic vs2
1172	16-cc 2a II	His3.3B	FBgn0004828	Mitochondrial
1173	16-cc 2a II	hrg	FBgn0015949	RNA-binding
1174	16-cc 2a II	hrg	FBgn0015949	Spliceosome
1175	16-cc 2a II	hrg	FBgn0015949	Transcription factor/DNA binding	Maybe TF
1176	16-cc 2a II	Hs3st-A	FBgn0053147	Metabolic	enzyme
1177	16-cc 2a II	Hs3st-A	FBgn0053147	Trans-membrane proteins
1178	16-cc 2a II	Hs3st-A	FBgn0053147	Metabolic vs2
1179	16-cc 2a II	Hsc70-3	FBgn0001218	Chaperone and heat shock proteins
1180	16-cc 2a II	Hsc70-3	FBgn0001218	Mitochondrial
1181	16-cc 2a II	Hsc70-3	FBgn0001218	Secreted proteins
1182	16-cc 2a II	hwt	FBgn0264542	None
1183	16-cc 2a II	Imp	FBgn0285926	None
1184	16-cc 2a II	ImpL3	FBgn0001258	Human Disease	HuDis670
1185	16-cc 2a II	ImpL3	FBgn0001258	Metabolic	enzyme
1186	16-cc 2a II	ImpL3	FBgn0001258	Metabolic vs2
1187	16-cc 2a II	InR	FBgn0283499	Metabolic vs2
1188	16-cc 2a II	jim	FBgn0027339	Transcription factor/DNA binding	DNA-binding with transcription factor activity	zf-C2H2	Medium	TFscore=6
1189	16-cc 2a II	Karl	FBgn0030334	Trans-membrane proteins
1190	16-cc 2a II	KrT95D	FBgn0020647	None
1191	16-cc 2a II	kst	FBgn0004167	Cytoskeletal
1192	16-cc 2a II	l(1)G0469	FBgn0040153	Glycoproteins
1193	16-cc 2a II	l(2)01289	FBgn0010482	Mitochondrial
1194	16-cc 2a II	l(2)01289	FBgn0010482	Trans-membrane proteins
1195	16-cc 2a II	l(3)02640	FBgn0010786	Metabolic	enzyme
1196	16-cc 2a II	l(3)02640	FBgn0010786	Metabolic vs2
1197	16-cc 2a II	l(3)mbt	FBgn0002441	Transcription factor/DNA binding	DNA-binding with transcription factor activity		Medium
1198	16-cc 2a II	l(3)mbt	FBgn0002441	Conserved in bilaterians/lost in nematodes
1199	16-cc 2a II	mAChR-A	FBgn0000037	GPCRs
1200	16-cc 2a II	mAChR-A	FBgn0000037	Receptors
1201	16-cc 2a II	mAChR-A	FBgn0000037	Trans-membrane proteins
1202	16-cc 2a II	Mad	FBgn0011648	Major signaling pathways	TGF beta signaling pathway	TF
1203	16-cc 2a II	Mad	FBgn0011648	Receptors
1204	16-cc 2a II	Mad	FBgn0011648	Transcription factor/DNA binding	DNA-binding with transcription factor activity	MH1	High	TFscore=1
1205	16-cc 2a II	mlt	FBgn0265512	None
1206	16-cc 2a II	mol	FBgn0086711	Trans-membrane proteins
1207	16-cc 2a II	mxc	FBgn0260789	RNA-binding
1208	16-cc 2a II	mxc	FBgn0260789	Transcription factor/DNA binding	DNA-binding with transcription factor activity	AT_hook	Medium	TFscore=6
1209	16-cc 2a II	nAChRalpha3	FBgn0015519	Glycoproteins
1210	16-cc 2a II	nAChRalpha3	FBgn0015519	Trans-membrane proteins
1211	16-cc 2a II	nAChRalpha3	FBgn0015519	Transporters	Ion Channels	The Neurotransmitter Receptor, Cys loop, Ligand-gated Ion Channel (LIC) Family
1212	16-cc 2a II	nAChRalpha3	FBgn0015519	Ion channel		Y
1213	16-cc 2a II	Nelf-E	FBgn0017430	RNA-binding
1214	16-cc 2a II	Nelf-E	FBgn0017430	Transcription factor/DNA binding	Maybe TF
1215	16-cc 2a II	Nelf-E	FBgn0017430	Conserved in bilaterians/lost in nematodes
1216	16-cc 2a II	Nipped-B	FBgn0026401	Human Disease	HuDis670
1217	16-cc 2a II	Nlg2	FBgn0031866	Trans-membrane proteins
1218	16-cc 2a II	nmo	FBgn0011817	Kinases	Protein Kinase
1219	16-cc 2a II	nmo	FBgn0011817	Major signaling pathways	Circadian Clock pathway	NCore
1220	16-cc 2a II	Nna1	FBgn0265726	None
1221	16-cc 2a II	Nost	FBgn0259734	None
1222	16-cc 2a II	nudE	FBgn0036059	Cytoskeletal
1223	16-cc 2a II	Oda	FBgn0014184	Conserved in bilaterians/lost in nematodes
1224	16-cc 2a II	orb	FBgn0004882	RNA-binding
1225	16-cc 2a II	ovo	FBgn0003028	Cytoskeletal
1226	16-cc 2a II	ovo	FBgn0003028	Transcription factor/DNA binding	DNA-binding with transcription factor activity	zf-C2H2	High	TFscore=1
1227	16-cc 2a II	Parp	FBgn0010247	Autophagy-related
1228	16-cc 2a II	Parp	FBgn0010247	Spliceosome
1229	16-cc 2a II	Parp	FBgn0010247	Transcription factor/DNA binding	DNA-binding with transcription factor activity
1230	16-cc 2a II	Pcd	FBgn0024841	Mitochondrial
1231	16-cc 2a II	Pcd	FBgn0024841	Metabolic vs2
1232	16-cc 2a II	Pcyt1	FBgn0041342	Metabolic	enzyme
1233	16-cc 2a II	Pcyt1	FBgn0041342	Metabolic vs2
1234	16-cc 2a II	Pde9	FBgn0259171	Metabolic	enzyme
1235	16-cc 2a II	Pde9	FBgn0259171	Conserved in bilaterians/lost in nematodes
1236	16-cc 2a II	Pde9	FBgn0259171	Metabolic vs2
1237	16-cc 2a II	Pi3K68D	FBgn0015278	Autophagy-related
1238	16-cc 2a II	Pi3K68D	FBgn0015278	Kinases	Non-protein Kinase
1239	16-cc 2a II	Pi3K68D	FBgn0015278	Metabolic	enzyme
1240	16-cc 2a II	Pi3K68D	FBgn0015278	Metabolic vs2
1241	16-cc 2a II	piwi	FBgn0004872	RNA-binding
1242	16-cc 2a II	plum	FBgn0039431	Receptors
1243	16-cc 2a II	plum	FBgn0039431	Trans-membrane proteins
1244	16-cc 2a II	Prosap	FBgn0040752	None
1245	16-cc 2a II	Psc	FBgn0005624	Transcription factor/DNA binding	DNA-binding with transcription factor activity
1246	16-cc 2a II	Psc	FBgn0005624	Ubiquitin-related
1247	16-cc 2a II	psq	FBgn0263102	Transcription factor/DNA binding	DNA-binding with transcription factor activity	HTH_psq		TFscore=5
1248	16-cc 2a II	psq	FBgn0263102	Ubiquitin-related
1249	16-cc 2a II	px	FBgn0003175	None
1250	16-cc 2a II	qin	FBgn0263974	Conserved in bilaterians/lost in nematodes
1251	16-cc 2a II	qua	FBgn0003187	Cytoskeletal
1252	16-cc 2a II	Rab35	FBgn0031090	None
1253	16-cc 2a II	RapGAP1	FBgn0264895	None
1254	16-cc 2a II	Rbp9	FBgn0010263	RNA-binding
1255	16-cc 2a II	Rbp9	FBgn0010263	Spliceosome
1256	16-cc 2a II	ref(2)P	FBgn0003231	Mitochondrial
1257	16-cc 2a II	Reph	FBgn0021800	None
1258	16-cc 2a II	REPTOR-BP	FBgn0032202	Transcription factor/DNA binding	DNA-binding with transcription factor activity	bZIP	Medium	TFscore=6
1259	16-cc 2a II	REPTOR-BP	FBgn0032202	Conserved in bilaterians/lost in nematodes
1260	16-cc 2a II	rhi	FBgn0004400	Transcription factor/DNA binding	Chromatin regulation
1261	16-cc 2a II	RpS10a	FBgn0027494	Ribosome
1262	16-cc 2a II	RpS19b	FBgn0039129	Human Disease	HuDis670
1263	16-cc 2a II	RpS19b	FBgn0039129	Ribosome
1264	16-cc 2a II	rt	FBgn0003292	Human Disease	HuDis670
1265	16-cc 2a II	rt	FBgn0003292	Metabolic	enzyme
1266	16-cc 2a II	rt	FBgn0003292	Trans-membrane proteins
1267	16-cc 2a II	rt	FBgn0003292	Metabolic vs2
1268	16-cc 2a II	Rtnl1	FBgn0053113	Mitochondrial
1269	16-cc 2a II	Rtnl1	FBgn0053113	Trans-membrane proteins
1270	16-cc 2a II	rudhira	FBgn0266019	None
1271	16-cc 2a II	sbb	FBgn0285917	None
1272	16-cc 2a II	Sdc	FBgn0010415	Metabolic	other
1273	16-cc 2a II	Sdc	FBgn0010415	Receptors
1274	16-cc 2a II	Sdc	FBgn0010415	Secreted proteins
1275	16-cc 2a II	Sdc	FBgn0010415	Trans-membrane proteins
1276	16-cc 2a II	Sdc	FBgn0010415	Metabolic vs2
1277	16-cc 2a II	Sdc	FBgn0010415	Matrisome	Homologs/Orthologs to Mammalian Matrisome-Associated Genes	ECM-affiliated		Syndecan
1278	16-cc 2a II	Sema1a	FBgn0011259	Glycoproteins
1279	16-cc 2a II	Sema1a	FBgn0011259	Receptors
1280	16-cc 2a II	Sema1a	FBgn0011259	Trans-membrane proteins
1281	16-cc 2a II	Sema1a	FBgn0011259	Matrisome	Homologs/Orthologs to Mammalian Matrisome-Associated Genes	ECM-affiliated		Semaphorin
1282	16-cc 2a II	shep	FBgn0052423	RNA-binding
1283	16-cc 2a II	shg	FBgn0003391	Glycoproteins
1284	16-cc 2a II	shg	FBgn0003391	Receptors
1285	16-cc 2a II	shg	FBgn0003391	Trans-membrane proteins
1286	16-cc 2a II	shot	FBgn0013733	Cytoskeletal
1287	16-cc 2a II	shot	FBgn0013733	Mitochondrial
1288	16-cc 2a II	sina	FBgn0003410	None
1289	16-cc 2a II	SK	FBgn0029761	Receptors
1290	16-cc 2a II	SK	FBgn0029761	Trans-membrane proteins
1291	16-cc 2a II	SK	FBgn0029761	Transporters	Ion Channels	The Voltage-gated Ion Channel (VIC) Superfamily
1292	16-cc 2a II	SK	FBgn0029761	Ion channel		Y
1293	16-cc 2a II	sm	FBgn0003435	RNA-binding
1294	16-cc 2a II	SNF4Agamma	FBgn0264357	Autophagy-related
1295	16-cc 2a II	SNF4Agamma	FBgn0264357	Major signaling pathways	INSULIN signaling pathway	other
1296	16-cc 2a II	SNF4Agamma	FBgn0264357	Metabolic	other
1297	16-cc 2a II	SNF4Agamma	FBgn0264357	Metabolic vs2
1298	16-cc 2a II	Sodh-2	FBgn0022359	Human Disease	HuDis670
1299	16-cc 2a II	Sodh-2	FBgn0022359	Metabolic	enzyme
1300	16-cc 2a II	Sodh-2	FBgn0022359	Metabolic vs2
1301	16-cc 2a II	Spn	FBgn0010905	None
1302	16-cc 2a II	Spn27A	FBgn0028990	Glycoproteins
1303	16-cc 2a II	Spn27A	FBgn0028990	Major signaling pathways	Toll pathway
1304	16-cc 2a II	Spn27A	FBgn0028990	Secreted proteins
1305	16-cc 2a II	Spn27A	FBgn0028990	Matrisome	Homologs/Orthologs to Mammalian Matrisome-Associated Genes	ECM Regulators		Serpin
1306	16-cc 2a II	Src64B	FBgn0262733	Cytoskeletal
1307	16-cc 2a II	Src64B	FBgn0262733	Kinases	Protein Kinase
1308	16-cc 2a II	Src64B	FBgn0262733	Major signaling pathways	EGFR and PVR RTK signaling pathway	other
1309	16-cc 2a II	Src64B	FBgn0262733	Major signaling pathways	TNF alpha signaling pathway	other
1310	16-cc 2a II	stx	FBgn0052676	Ubiquitin-related
1311	16-cc 2a II	stx	FBgn0052676	Conserved in bilaterians/lost in nematodes
1312	16-cc 2a II	sunn	FBgn0052088	None
1313	16-cc 2a II	Swip-1	FBgn0032731	None
1314	16-cc 2a II	Syn1	FBgn0037130	Cytoskeletal
1315	16-cc 2a II	tacc	FBgn0026620	Conserved in bilaterians/lost in nematodes
1316	16-cc 2a II	Tao	FBgn0031030	Autophagy-related
1317	16-cc 2a II	Tao	FBgn0031030	Kinases	Protein Kinase
1318	16-cc 2a II	Tao	FBgn0031030	Receptors
1319	16-cc 2a II	Thor	FBgn0261560	Major signaling pathways	INSULIN signaling pathway	other
1320	16-cc 2a II	Thor	FBgn0261560	Metabolic	other
1321	16-cc 2a II	Thor	FBgn0261560	RNA-binding
1322	16-cc 2a II	Thor	FBgn0261560	Conserved in bilaterians/lost in nematodes
1323	16-cc 2a II	Thor	FBgn0261560	Metabolic vs2
1324	16-cc 2a II	Tina-1	FBgn0035083	Mitochondrial
1325	16-cc 2a II	Tpi	FBgn0086355	Human Disease	HuDis670
1326	16-cc 2a II	Tpi	FBgn0086355	Metabolic	enzyme
1327	16-cc 2a II	Tpi	FBgn0086355	Mitochondrial
1328	16-cc 2a II	Tpi	FBgn0086355	Metabolic vs2
1329	16-cc 2a II	TRAM	FBgn0040340	Trans-membrane proteins
1330	16-cc 2a II	Tre1	FBgn0046687	GPCRs
1331	16-cc 2a II	Tre1	FBgn0046687	Receptors
1332	16-cc 2a II	Tre1	FBgn0046687	Trans-membrane proteins
1333	16-cc 2a II	Tre1	FBgn0046687	Conserved in bilaterians/lost in nematodes
1334	16-cc 2a II	Trf2	FBgn0261793	Transcription factor/DNA binding	DNA-binding with transcription factor activity
1335	16-cc 2a II	trol	FBgn0284408	Metabolic vs2
1336	16-cc 2a II	trol	FBgn0284408	Matrisome	Homologs/Orthologs to Mammalian Core Matrisome Genes	Proteoglycans		Basement Membrane
1337	16-cc 2a II	tsh	FBgn0003866	Major signaling pathways	HIPPO signaling pathway	TF
1338	16-cc 2a II	tsh	FBgn0003866	Transcription factor/DNA binding	DNA-binding with transcription factor activity	zf-C2H2	High	TFscore=1
1339	16-cc 2a II	Tsp42Ea	FBgn0029508	Receptors
1340	16-cc 2a II	Tsp42Ea	FBgn0029508	Trans-membrane proteins
1341	16-cc 2a II	ttk	FBgn0003870	Major signaling pathways	FGFR signaling pathway	other
1342	16-cc 2a II	ttk	FBgn0003870	Transcription factor/DNA binding	DNA-binding with transcription factor activity	zf-C2H2	High	TFscore=1
1343	16-cc 2a II	ttk	FBgn0003870	Ubiquitin-related
1344	16-cc 2a II	tty	FBgn0015558	Trans-membrane proteins
1345	16-cc 2a II	tty	FBgn0015558	Ion channel		Y
1346	16-cc 2a II	UbcE2H	FBgn0029996	Ubiquitin-related
1347	16-cc 2a II	unc-13	FBgn0025726	None
1348	16-cc 2a II	Unr	FBgn0263352	RNA-binding
1349	16-cc 2a II	Unr	FBgn0263352	Transcription factor/DNA binding	DNA-binding with transcription factor activity
1350	16-cc 2a II	Unr	FBgn0263352	Conserved in bilaterians/lost in nematodes
1351	16-cc 2a II	vilya	FBgn0283545	None
1352	16-cc 2a II	wde	FBgn0027499	Conserved in bilaterians/lost in nematodes
1353	16-cc 2a II	Xrp1	FBgn0261113	Transcription factor/DNA binding	DNA-binding with transcription factor activity	AT_hook	Medium	TFscore=6
1354	16-cc 2ab	AGO3	FBgn0250816	RNA-binding
1355	16-cc 2ab	akirin	FBgn0082598	None
1356	16-cc 2ab	Atpalpha	FBgn0002921	Human Disease	HuDis670
1357	16-cc 2ab	Atpalpha	FBgn0002921	Mitochondrial
1358	16-cc 2ab	Atpalpha	FBgn0002921	Trans-membrane proteins
1359	16-cc 2ab	Atpalpha	FBgn0002921	Transporters	ATP-Dependent	The P-type ATPase (P-ATPase) Superfamily
1360	16-cc 2ab	baz	FBgn0000163	Cytoskeletal
1361	16-cc 2ab	BigH1	FBgn0038252	None
1362	16-cc 2ab	bip1	FBgn0026263	Trans-membrane proteins
1363	16-cc 2ab	bru1	FBgn0000114	RNA-binding
1364	16-cc 2ab	bru1	FBgn0000114	Spliceosome
1365	16-cc 2ab	C1GalTA	FBgn0032078	Metabolic	enzyme
1366	16-cc 2ab	C1GalTA	FBgn0032078	Trans-membrane proteins
1367	16-cc 2ab	C1GalTA	FBgn0032078	Metabolic vs2
1368	16-cc 2ab	Cad87A	FBgn0037963	Glycoproteins
1369	16-cc 2ab	Cad87A	FBgn0037963	Trans-membrane proteins
1370	16-cc 2ab	cdi	FBgn0004876	Kinases	Protein Kinase
1371	16-cc 2ab	CG10082	FBgn0034644	Kinases	Non-protein Kinase
1372	16-cc 2ab	CG10082	FBgn0034644	Metabolic vs2
1373	16-cc 2ab	CG10527	FBgn0034583	Mitochondrial
1374	16-cc 2ab	CG10527	FBgn0034583	Methyltransferase				Source: GO annotation
1375	16-cc 2ab	CG11596	FBgn0023522	Methyltransferase				Source: GO annotation
1376	16-cc 2ab	CG11596	FBgn0023522	Metabolic vs2
1377	16-cc 2ab	CG11899	FBgn0014427	Human Disease	HuDis670
1378	16-cc 2ab	CG11899	FBgn0014427	Metabolic	enzyme
1379	16-cc 2ab	CG11899	FBgn0014427	Metabolic vs2
1380	16-cc 2ab	CG12355	FBgn0040805	Mitochondrial
1381	16-cc 2ab	CG12355	FBgn0040805	Peroxisomal
1382	16-cc 2ab	CG12355	FBgn0040805	Trans-membrane proteins
1383	16-cc 2ab	CG12721	FBgn0030373	None
1384	16-cc 2ab	CG13631	FBgn0040600	None
1385	16-cc 2ab	CG13698	FBgn0036773	Trans-membrane proteins
1386	16-cc 2ab	CG13784	FBgn0031897	Trans-membrane proteins
1387	16-cc 2ab	CG14410	FBgn0030583	None
1388	16-cc 2ab	CG14441	FBgn0029895	Transcription factor/DNA binding	DNA-binding with transcription factor activity	zf-C2H2	Medium	TFscore=6
1389	16-cc 2ab	CG14647	FBgn0037244	Trans-membrane proteins
1390	16-cc 2ab	CG14647	FBgn0037244	Ubiquitin-related
1391	16-cc 2ab	CG14647	FBgn0037244	Conserved in bilaterians/lost in nematodes
1392	16-cc 2ab	CG14721	FBgn0037942	Human Disease	HuDis670
1393	16-cc 2ab	CG14721	FBgn0037942	Kinases	Non-protein Kinase
1394	16-cc 2ab	CG14721	FBgn0037942	Metabolic	enzyme
1395	16-cc 2ab	CG14721	FBgn0037942	Metabolic vs2
1396	16-cc 2ab	CG15093	FBgn0034390	Metabolic	enzyme
1397	16-cc 2ab	CG15093	FBgn0034390	Mitochondrial
1398	16-cc 2ab	CG15093	FBgn0034390	Metabolic vs2
1399	16-cc 2ab	CG15098	FBgn0034398	Trans-membrane proteins
1400	16-cc 2ab	CG15309	FBgn0030183	None
1401	16-cc 2ab	CG15628	FBgn0031632	None
1402	16-cc 2ab	CG1890	FBgn0039869	Chaperone and heat shock proteins
1403	16-cc 2ab	CG1910	FBgn0022349	None
1404	16-cc 2ab	CG2003	FBgn0039886	Trans-membrane proteins
1405	16-cc 2ab	CG2003	FBgn0039886	Transporters	Secondary Transporter	The Major Facilitator Superfamily (MFS)
1406	16-cc 2ab	CG2003	FBgn0039886	Metabolic vs2
1407	16-cc 2ab	CG30389	FBgn0050389	Trans-membrane proteins
1408	16-cc 2ab	CG30403	FBgn0050403	Transcription factor/DNA binding	DNA-binding with transcription factor activity	BESS	Medium	TFscore=6
1409	16-cc 2ab	CG32428	FBgn0052428	None
1410	16-cc 2ab	CG32625	FBgn0052625	None
1411	16-cc 2ab	CG33229	FBgn0053229	None
1412	16-cc 2ab	CG3655	FBgn0040397	Trans-membrane proteins
1413	16-cc 2ab	CG3831	FBgn0034804	Trans-membrane proteins
1414	16-cc 2ab	CG3961	FBgn0036821	Metabolic	enzyme
1415	16-cc 2ab	CG3961	FBgn0036821	Mitochondrial
1416	16-cc 2ab	CG3961	FBgn0036821	Peroxisomal
1417	16-cc 2ab	CG3961	FBgn0036821	Trans-membrane proteins
1418	16-cc 2ab	CG3961	FBgn0036821	Metabolic vs2
1419	16-cc 2ab	CG42240	FBgn0250869	None
1420	16-cc 2ab	CG42260	FBgn0259145	Trans-membrane proteins
1421	16-cc 2ab	CG42260	FBgn0259145	Transporters	Ion Channels	The Voltage-gated Ion Channel (VIC) Superfamily
1422	16-cc 2ab	CG42260	FBgn0259145	Ion channel		Y
1423	16-cc 2ab	CG43658	FBgn0263706	Conserved in bilaterians/lost in nematodes
1424	16-cc 2ab	CG44838	FBgn0266101	None
1425	16-cc 2ab	CG45071	FBgn0266441	Metabolic	other
1426	16-cc 2ab	CG45071	FBgn0266441	Transcription factor/DNA binding	DNA-binding with transcription factor activity
1427	16-cc 2ab	CG45071	FBgn0266441	Metabolic vs2
1428	16-cc 2ab	CG4842	FBgn0036620	Trans-membrane proteins
1429	16-cc 2ab	CG4842	FBgn0036620	Metabolic vs2
1430	16-cc 2ab	CG5059	FBgn0037007	Trans-membrane proteins
1431	16-cc 2ab	CG6175	FBgn0036152	None
1432	16-cc 2ab	CG6329	FBgn0033872	None
1433	16-cc 2ab	CG6767	FBgn0036030	Kinases	Non-protein Kinase
1434	16-cc 2ab	CG6767	FBgn0036030	Metabolic	enzyme
1435	16-cc 2ab	CG6767	FBgn0036030	Metabolic vs2
1436	16-cc 2ab	CG6770	FBgn0032400	None
1437	16-cc 2ab	CG7208	FBgn0038575	None
1438	16-cc 2ab	CG9331	FBgn0032889	Glycoproteins
1439	16-cc 2ab	CG9331	FBgn0032889	Mitochondrial
1440	16-cc 2ab	CG9821	Dmel	None
1441	16-cc 2ab	CG9992	FBgn0030744	None
1442	16-cc 2ab	chn	FBgn0015371	Transcription factor/DNA binding	DNA-binding with transcription factor activity	zf-C2H2	High	TFscore=1
1443	16-cc 2ab	Corp	FBgn0030028	None
1444	16-cc 2ab	CR45666	FBgn0267226	None
1445	16-cc 2ab	CR45667	FBgn0267227	None
1446	16-cc 2ab	Cyp6v1	FBgn0031126	Metabolic	enzyme
1447	16-cc 2ab	Cyp6v1	FBgn0031126	Trans-membrane proteins
1448	16-cc 2ab	Cyp6v1	FBgn0031126	Metabolic vs2
1449	16-cc 2ab	Cys	FBgn0004629	Glycoproteins
1450	16-cc 2ab	Cys	FBgn0004629	Secreted proteins
1451	16-cc 2ab	Cys	FBgn0004629	Matrisome	Homologs/Orthologs to Mammalian Matrisome-Associated Genes	ECM Regulators
1452	16-cc 2ab	dap	FBgn0010316	None
1453	16-cc 2ab	dco	FBgn0002413	Kinases	Protein Kinase
1454	16-cc 2ab	dco	FBgn0002413	Major signaling pathways	Circadian Clock pathway	Core
1455	16-cc 2ab	dco	FBgn0002413	Major signaling pathways	HIPPO signaling pathway	other
1456	16-cc 2ab	Dhit	FBgn0028743	None
1457	16-cc 2ab	Diap1	FBgn0260635	Ubiquitin-related
1458	16-cc 2ab	Diap1	FBgn0260635	Conserved in bilaterians/lost in nematodes
1459	16-cc 2ab	Dmtn	FBgn0037443	Trans-membrane proteins
1460	16-cc 2ab	DNApol-eta	FBgn0037141	Human Disease	HuDis670
1461	16-cc 2ab	dnc	FBgn0000479	Human Disease	HuDis670
1462	16-cc 2ab	dnc	FBgn0000479	Metabolic	enzyme
1463	16-cc 2ab	dnc	FBgn0000479	Metabolic vs2
1464	16-cc 2ab	dpr6	FBgn0040823	None
1465	16-cc 2ab	Dsp1	FBgn0278608	Major signaling pathways	Imd pathway
1466	16-cc 2ab	Dsp1	FBgn0278608	Transcription factor/DNA binding	DNA-binding with transcription factor activity	HMG_box	High	TFscore=5
1467	16-cc 2ab	Ect4	FBgn0262579	Trans-membrane proteins
1468	16-cc 2ab	elav	FBgn0260400	Metabolic	other
1469	16-cc 2ab	elav	FBgn0260400	RNA-binding
1470	16-cc 2ab	elav	FBgn0260400	Metabolic vs2
1471	16-cc 2ab	fax	FBgn0014163	Mitochondrial
1472	16-cc 2ab	Fer1HCH	FBgn0015222	Metabolic	enzyme
1473	16-cc 2ab	Fer1HCH	FBgn0015222	Mitochondrial
1474	16-cc 2ab	Fer1HCH	FBgn0015222	Metabolic vs2
1475	16-cc 2ab	Fer2LCH	FBgn0015221	Mitochondrial
1476	16-cc 2ab	Fer2LCH	FBgn0015221	Metabolic vs2
1477	16-cc 2ab	Fim	FBgn0024238	Cytoskeletal
1478	16-cc 2ab	fok	FBgn0263773	None
1479	16-cc 2ab	Gasz	FBgn0033273	Conserved in bilaterians/lost in nematodes
1480	16-cc 2ab	gb	FBgn0039487	Trans-membrane proteins
1481	16-cc 2ab	gb	FBgn0039487	Transporters	Secondary Transporter	The Amino Acid-Polyamine-Organocation (APC) Family
1482	16-cc 2ab	gb	FBgn0039487	Metabolic vs2
1483	16-cc 2ab	Ggt-1	FBgn0030932	Metabolic	enzyme
1484	16-cc 2ab	Ggt-1	FBgn0030932	Secreted proteins
1485	16-cc 2ab	Ggt-1	FBgn0030932	Trans-membrane proteins
1486	16-cc 2ab	Ggt-1	FBgn0030932	Metabolic vs2
1487	16-cc 2ab	GILT3	FBgn0039098	None
1488	16-cc 2ab	glec	FBgn0015229	Trans-membrane proteins
1489	16-cc 2ab	glob1	FBgn0027657	None
1490	16-cc 2ab	gpp	FBgn0264495	Metabolic	other
1491	16-cc 2ab	gpp	FBgn0264495	Methyltransferase				Source: GO annotation
1492	16-cc 2ab	gpp	FBgn0264495	Metabolic vs2
1493	16-cc 2ab	grk	FBgn0001137	Cytoskeletal
1494	16-cc 2ab	grk	FBgn0001137	Major signaling pathways	EGFR and PVR RTK signaling pathway	ligand
1495	16-cc 2ab	grk	FBgn0001137	Secreted proteins
1496	16-cc 2ab	grk	FBgn0001137	Trans-membrane proteins
1497	16-cc 2ab	grk	FBgn0001137	Matrisome	Homologs/Orthologs to Mammalian Matrisome-Associated Genes	Secreted Factors		EGFR Ligand
1498	16-cc 2ab	GstD3	FBgn0010039	Metabolic	enzyme
1499	16-cc 2ab	GstD3	FBgn0010039	Metabolic vs2
1500	16-cc 2ab	GstE1	FBgn0034335	Metabolic	enzyme
1501	16-cc 2ab	GstE1	FBgn0034335	Metabolic vs2
1502	16-cc 2ab	GstO3	FBgn0035904	Autophagy-related
1503	16-cc 2ab	GstO3	FBgn0035904	Metabolic vs2
1504	16-cc 2ab	hdc	FBgn0010113	None
1505	16-cc 2ab	His3.3B	FBgn0004828	Mitochondrial
1506	16-cc 2ab	Hnf4	FBgn0004914	Major signaling pathways	Nuclear hormone receptor
1507	16-cc 2ab	Hnf4	FBgn0004914	Metabolic	enzyme
1508	16-cc 2ab	Hnf4	FBgn0004914	Receptors
1509	16-cc 2ab	Hnf4	FBgn0004914	Transcription factor/DNA binding	DNA-binding with transcription factor activity	zf-C4	High	TFscore=5
1510	16-cc 2ab	Hnf4	FBgn0004914	Metabolic vs2
1511	16-cc 2ab	Hs3st-A	FBgn0053147	Metabolic	enzyme
1512	16-cc 2ab	Hs3st-A	FBgn0053147	Trans-membrane proteins
1513	16-cc 2ab	Hs3st-A	FBgn0053147	Metabolic vs2
1514	16-cc 2ab	hwt	FBgn0264542	None
1515	16-cc 2ab	Idgf4	FBgn0026415	Secreted proteins
1516	16-cc 2ab	Idgf4	FBgn0026415	Matrisome	Drosophila Matrisome Genes	Apical Matrix		Cuticle; Chitinase-like
1517	16-cc 2ab	InR	FBgn0283499	Metabolic vs2
1518	16-cc 2ab	Inx2	FBgn0027108	Mitochondrial
1519	16-cc 2ab	Inx2	FBgn0027108	Trans-membrane proteins
1520	16-cc 2ab	Inx2	FBgn0027108	Transporters	Ion Channels	The Gap Junction-forming Innexin (Innexin) Family
1521	16-cc 2ab	Inx2	FBgn0027108	Ion channel		Y
1522	16-cc 2ab	jigr1	FBgn0039350	Transcription factor/DNA binding	Maybe TF	MADF		TFscore=NA
1523	16-cc 2ab	kek1	FBgn0015399	Major signaling pathways	EGFR and PVR RTK signaling pathway	other
1524	16-cc 2ab	kek1	FBgn0015399	Receptors
1525	16-cc 2ab	kek1	FBgn0015399	Trans-membrane proteins
1526	16-cc 2ab	l(3)L1231	FBgn0086686	Trans-membrane proteins
1527	16-cc 2ab	magu	FBgn0262169	Secreted proteins
1528	16-cc 2ab	magu	FBgn0262169	Matrisome	Homologs/Orthologs to Mammalian Core Matrisome Genes	ECM Glycoproteins
1529	16-cc 2ab	Mes2	FBgn0037207	None
1530	16-cc 2ab	miple2	FBgn0029002	Secreted proteins
1531	16-cc 2ab	miple2	FBgn0029002	Matrisome	Drosophila Matrisome Genes	Secreted Factors
1532	16-cc 2ab	Mnt	FBgn0023215	Transcription factor/DNA binding	DNA-binding with transcription factor activity	HLH	Medium	TFscore=6
1533	16-cc 2ab	Mnt	FBgn0023215	Conserved in bilaterians/lost in nematodes
1534	16-cc 2ab	mol	FBgn0086711	Trans-membrane proteins
1535	16-cc 2ab	mrj	FBgn0034091	Chaperone and heat shock proteins
1536	16-cc 2ab	Msp300	FBgn0261836	Cytoskeletal
1537	16-cc 2ab	Msp300	FBgn0261836	Mitochondrial
1538	16-cc 2ab	Msp300	FBgn0261836	RNA-binding
1539	16-cc 2ab	Msp300	FBgn0261836	Trans-membrane proteins
1540	16-cc 2ab	mud	FBgn0002873	Receptors
1541	16-cc 2ab	mud	FBgn0002873	Trans-membrane proteins
1542	16-cc 2ab	Myc	FBgn0262656	Major signaling pathways	INSULIN signaling pathway	TF
1543	16-cc 2ab	Myc	FBgn0262656	Transcription factor/DNA binding	DNA-binding with transcription factor activity	HLH		TFscore=6
1544	16-cc 2ab	Myc	FBgn0262656	Conserved in bilaterians/lost in nematodes
1545	16-cc 2ab	Nipped-B	FBgn0026401	Human Disease	HuDis670
1546	16-cc 2ab	Nlg2	FBgn0031866	Trans-membrane proteins
1547	16-cc 2ab	Nost	FBgn0259734	None
1548	16-cc 2ab	Npc2a	FBgn0031381	Human Disease	HuDis670
1549	16-cc 2ab	Npc2a	FBgn0031381	Metabolic	other
1550	16-cc 2ab	Npc2a	FBgn0031381	Secreted proteins
1551	16-cc 2ab	Npc2a	FBgn0031381	Metabolic vs2
1552	16-cc 2ab	Oda	FBgn0014184	Conserved in bilaterians/lost in nematodes
1553	16-cc 2ab	orb	FBgn0004882	RNA-binding
1554	16-cc 2ab	par-1	FBgn0260934	Cytoskeletal
1555	16-cc 2ab	par-1	FBgn0260934	Kinases	Protein Kinase
1556	16-cc 2ab	par-1	FBgn0260934	Ubiquitin-related
1557	16-cc 2ab	pcs	FBgn0033988	None
1558	16-cc 2ab	Pdcd4	FBgn0030520	Conserved in bilaterians/lost in nematodes
1559	16-cc 2ab	Pde9	FBgn0259171	Metabolic	enzyme
1560	16-cc 2ab	Pde9	FBgn0259171	Conserved in bilaterians/lost in nematodes
1561	16-cc 2ab	Pde9	FBgn0259171	Metabolic vs2
1562	16-cc 2ab	pdgy	FBgn0027601	Metabolic	enzyme
1563	16-cc 2ab	pdgy	FBgn0027601	Mitochondrial
1564	16-cc 2ab	pdgy	FBgn0027601	Peroxisomal
1565	16-cc 2ab	pdgy	FBgn0027601	Metabolic vs2
1566	16-cc 2ab	piwi	FBgn0004872	RNA-binding
1567	16-cc 2ab	PRAS40	FBgn0267824	None
1568	16-cc 2ab	Prosap	FBgn0040752	None
1569	16-cc 2ab	Ptp10D	FBgn0004370	Glycoproteins
1570	16-cc 2ab	Ptp10D	FBgn0004370	Phosphatases	Protein Phosphatase
1571	16-cc 2ab	Ptp10D	FBgn0004370	Receptors
1572	16-cc 2ab	Ptp10D	FBgn0004370	Trans-membrane proteins
1573	16-cc 2ab	Ptpmeg2	FBgn0028341	Phosphatases	Protein Phosphatase
1574	16-cc 2ab	Ptpmeg2	FBgn0028341	Trans-membrane proteins
1575	16-cc 2ab	puc	FBgn0243512	Major signaling pathways	Imd pathway
1576	16-cc 2ab	puc	FBgn0243512	Major signaling pathways	Planar Cell Polarity pathway
1577	16-cc 2ab	puc	FBgn0243512	Major signaling pathways	TNF alpha signaling pathway	other
1578	16-cc 2ab	puc	FBgn0243512	Phosphatases	Protein Phosphatase
1579	16-cc 2ab	puc	FBgn0243512	Conserved in bilaterians/lost in nematodes
1580	16-cc 2ab	pyd	FBgn0262614	Kinases	Non-protein Kinase
1581	16-cc 2ab	pyd	FBgn0262614	Metabolic	enzyme
1582	16-cc 2ab	pyd	FBgn0262614	Metabolic vs2
1583	16-cc 2ab	QC	FBgn0052412	Secreted proteins
1584	16-cc 2ab	Rab35	FBgn0031090	None
1585	16-cc 2ab	Rbp6	FBgn0260943	RNA-binding
1586	16-cc 2ab	Rbp9	FBgn0010263	RNA-binding
1587	16-cc 2ab	Rbp9	FBgn0010263	Spliceosome
1588	16-cc 2ab	REPTOR	FBgn0039209	Transcription factor/DNA binding	DNA-binding with transcription factor activity	bZIP	Medium	TFscore=6
1589	16-cc 2ab	REPTOR	FBgn0039209	Conserved in bilaterians/lost in nematodes
1590	16-cc 2ab	RhoGAP18B	FBgn0261461	None
1591	16-cc 2ab	sbb	FBgn0285917	None
1592	16-cc 2ab	2021-09-04	FBgn0259923	Cytoskeletal
1593	16-cc 2ab	shot	FBgn0013733	Cytoskeletal
1594	16-cc 2ab	shot	FBgn0013733	Mitochondrial
1595	16-cc 2ab	SK	FBgn0029761	Receptors
1596	16-cc 2ab	SK	FBgn0029761	Trans-membrane proteins
1597	16-cc 2ab	SK	FBgn0029761	Transporters	Ion Channels	The Voltage-gated Ion Channel (VIC) Superfamily
1598	16-cc 2ab	SK	FBgn0029761	Ion channel		Y
1599	16-cc 2ab	Spn27A	FBgn0028990	Glycoproteins
1600	16-cc 2ab	Spn27A	FBgn0028990	Major signaling pathways	Toll pathway
1601	16-cc 2ab	Spn27A	FBgn0028990	Secreted proteins
1602	16-cc 2ab	Spn27A	FBgn0028990	Matrisome	Homologs/Orthologs to Mammalian Matrisome-Associated Genes	ECM Regulators		Serpin
1603	16-cc 2ab	spri	FBgn0085443	None
1604	16-cc 2ab	stai	FBgn0266521	Cytoskeletal
1605	16-cc 2ab	stil	FBgn0003527	None
1606	16-cc 2ab	stx	FBgn0052676	Ubiquitin-related
1607	16-cc 2ab	stx	FBgn0052676	Conserved in bilaterians/lost in nematodes
1608	16-cc 2ab	Syn1	FBgn0037130	Cytoskeletal
1609	16-cc 2ab	Syx1A	FBgn0013343	Receptors
1610	16-cc 2ab	Syx1A	FBgn0013343	Trans-membrane proteins
1611	16-cc 2ab	Tao	FBgn0031030	Autophagy-related
1612	16-cc 2ab	Tao	FBgn0031030	Kinases	Protein Kinase
1613	16-cc 2ab	Tao	FBgn0031030	Receptors
1614	16-cc 2ab	tna	FBgn0026160	Transcription factor/DNA binding	DNA-binding with transcription factor activity	zf-MIZ	Medium	TFscore=6
1615	16-cc 2ab	Tsp66E	FBgn0035936	Receptors
1616	16-cc 2ab	Tsp66E	FBgn0035936	Trans-membrane proteins
1617	16-cc 2ab	tty	FBgn0015558	Trans-membrane proteins
1618	16-cc 2ab	tty	FBgn0015558	Ion channel		Y
1619	16-cc 2ab	Unr	FBgn0263352	RNA-binding
1620	16-cc 2ab	Unr	FBgn0263352	Transcription factor/DNA binding	DNA-binding with transcription factor activity
1621	16-cc 2ab	Unr	FBgn0263352	Conserved in bilaterians/lost in nematodes
1622	16-cc 2ab	Vha26	FBgn0283535	Metabolic vs2
1623	16-cc 2ab	VhaAC39-1	FBgn0285910	Metabolic vs2
1624	16-cc 2ab	Wdr62	FBgn0031374	None
1625	16-cc 2b	aay	FBgn0023129	Human Disease	HuDis670
1626	16-cc 2b	aay	FBgn0023129	Metabolic	enzyme
1627	16-cc 2b	aay	FBgn0023129	Phosphatases	Protein Phosphatase
1628	16-cc 2b	aay	FBgn0023129	Metabolic vs2
1629	16-cc 2b	ade3	FBgn0000053	Metabolic	enzyme
1630	16-cc 2b	ade3	FBgn0000053	Metabolic vs2
1631	16-cc 2b	Aldh	FBgn0012036	Autophagy-related
1632	16-cc 2b	Aldh	FBgn0012036	Human Disease	HuDis670
1633	16-cc 2b	Aldh	FBgn0012036	Metabolic	enzyme
1634	16-cc 2b	Aldh	FBgn0012036	Mitochondrial
1635	16-cc 2b	Aldh	FBgn0012036	Metabolic vs2
1636	16-cc 2b	AOX3	FBgn0038349	Metabolic vs2
1637	16-cc 2b	bru1	FBgn0000114	RNA-binding
1638	16-cc 2b	bru1	FBgn0000114	Spliceosome
1639	16-cc 2b	Cdk4	FBgn0016131	Kinases	Protein Kinase
1640	16-cc 2b	CG10527	FBgn0034583	Mitochondrial
1641	16-cc 2b	CG10527	FBgn0034583	Methyltransferase				Source: GO annotation
1642	16-cc 2b	CG11739	FBgn0037239	Mitochondrial
1643	16-cc 2b	CG11739	FBgn0037239	Trans-membrane proteins
1644	16-cc 2b	CG11739	FBgn0037239	Transporters	Secondary Transporter	The Mitochondrial Tricarboxylate Carrier (MTC) Family
1645	16-cc 2b	CG11899	FBgn0014427	Human Disease	HuDis670
1646	16-cc 2b	CG11899	FBgn0014427	Metabolic	enzyme
1647	16-cc 2b	CG11899	FBgn0014427	Metabolic vs2
1648	16-cc 2b	CG12207	FBgn0038220	Conserved in bilaterians/lost in nematodes
1649	16-cc 2b	CG12262	FBgn0035811	Human Disease	HuDis670
1650	16-cc 2b	CG12262	FBgn0035811	Metabolic	enzyme
1651	16-cc 2b	CG12262	FBgn0035811	Mitochondrial
1652	16-cc 2b	CG12262	FBgn0035811	Metabolic vs2
1653	16-cc 2b	CG12355	FBgn0040805	Mitochondrial
1654	16-cc 2b	CG12355	FBgn0040805	Peroxisomal
1655	16-cc 2b	CG12355	FBgn0040805	Trans-membrane proteins
1656	16-cc 2b	CG13698	FBgn0036773	Trans-membrane proteins
1657	16-cc 2b	CG15047	FBgn0030938	Ubiquitin-related
1658	16-cc 2b	CG15093	FBgn0034390	Metabolic	enzyme
1659	16-cc 2b	CG15093	FBgn0034390	Mitochondrial
1660	16-cc 2b	CG15093	FBgn0034390	Metabolic vs2
1661	16-cc 2b	CG15098	FBgn0034398	Trans-membrane proteins
1662	16-cc 2b	CG15820	FBgn0035312	Peroxisomal
1663	16-cc 2b	CG15820	FBgn0035312	Conserved in bilaterians/lost in nematodes
1664	16-cc 2b	CG1665	FBgn0033451	Metabolic	other
1665	16-cc 2b	CG1665	FBgn0033451	Mitochondrial
1666	16-cc 2b	CG1665	FBgn0033451	Trans-membrane proteins
1667	16-cc 2b	CG1665	FBgn0033451	Metabolic vs2
1668	16-cc 2b	CG30285	FBgn0050285	Trans-membrane proteins
1669	16-cc 2b	CG30377	FBgn0050377	Trans-membrane proteins
1670	16-cc 2b	CG32428	FBgn0052428	None
1671	16-cc 2b	CG34401	FBgn0085430	None
1672	16-cc 2b	CG3770	FBgn0035085	Trans-membrane proteins
1673	16-cc 2b	CG3770	FBgn0035085	Conserved in bilaterians/lost in nematodes
1674	16-cc 2b	CG3831	FBgn0034804	Trans-membrane proteins
1675	16-cc 2b	CG43658	FBgn0263706	Conserved in bilaterians/lost in nematodes
1676	16-cc 2b	CG45071	FBgn0266441	Metabolic	other
1677	16-cc 2b	CG45071	FBgn0266441	Transcription factor/DNA binding	DNA-binding with transcription factor activity
1678	16-cc 2b	CG45071	FBgn0266441	Metabolic vs2
1679	16-cc 2b	CG4570	FBgn0037844	Transcription factor/DNA binding	DNA-binding with transcription factor activity		Medium
1680	16-cc 2b	CG4842	FBgn0036620	Trans-membrane proteins
1681	16-cc 2b	CG4842	FBgn0036620	Metabolic vs2
1682	16-cc 2b	CG6175	FBgn0036152	None
1683	16-cc 2b	CG6287	FBgn0032350	Human Disease	HuDis670
1684	16-cc 2b	CG6287	FBgn0032350	Metabolic	enzyme
1685	16-cc 2b	CG6287	FBgn0032350	Metabolic vs2
1686	16-cc 2b	CG6293	FBgn0037807	Trans-membrane proteins
1687	16-cc 2b	CG6293	FBgn0037807	Transporters	Secondary Transporter	The Nucleobase:Cation Symporter-2 (NCS2) Family
1688	16-cc 2b	CG6293	FBgn0037807	Metabolic vs2
1689	16-cc 2b	CG6767	FBgn0036030	Kinases	Non-protein Kinase
1690	16-cc 2b	CG6767	FBgn0036030	Metabolic	enzyme
1691	16-cc 2b	CG6767	FBgn0036030	Metabolic vs2
1692	16-cc 2b	CG7054	FBgn0038972	None
1693	16-cc 2b	CG7255	FBgn0036493	Spliceosome
1694	16-cc 2b	CG7255	FBgn0036493	Trans-membrane proteins
1695	16-cc 2b	CG7255	FBgn0036493	Transporters	Secondary Transporter	The Amino Acid-Polyamine-Organocation (APC) Family
1696	16-cc 2b	CG7255	FBgn0036493	Metabolic vs2
1697	16-cc 2b	CG9331	FBgn0032889	Glycoproteins
1698	16-cc 2b	CG9331	FBgn0032889	Mitochondrial
1699	16-cc 2b	CR45596	FBgn0267156	None
1700	16-cc 2b	cry	FBgn0025680	GPCRs
1701	16-cc 2b	cry	FBgn0025680	Major signaling pathways	Circadian Clock pathway	Core
1702	16-cc 2b	cry	FBgn0025680	Receptors
1703	16-cc 2b	cry	FBgn0025680	Trans-membrane proteins
1704	16-cc 2b	dap	FBgn0010316	None
1705	16-cc 2b	fax	FBgn0014163	Mitochondrial
1706	16-cc 2b	Fer1HCH	FBgn0015222	Metabolic	enzyme
1707	16-cc 2b	Fer1HCH	FBgn0015222	Mitochondrial
1708	16-cc 2b	Fer1HCH	FBgn0015222	Metabolic vs2
1709	16-cc 2b	fok	FBgn0263773	None
1710	16-cc 2b	gb	FBgn0039487	Trans-membrane proteins
1711	16-cc 2b	gb	FBgn0039487	Transporters	Secondary Transporter	The Amino Acid-Polyamine-Organocation (APC) Family
1712	16-cc 2b	gb	FBgn0039487	Metabolic vs2
1713	16-cc 2b	Ggt-1	FBgn0030932	Metabolic	enzyme
1714	16-cc 2b	Ggt-1	FBgn0030932	Secreted proteins
1715	16-cc 2b	Ggt-1	FBgn0030932	Trans-membrane proteins
1716	16-cc 2b	Ggt-1	FBgn0030932	Metabolic vs2
1717	16-cc 2b	GILT2	FBgn0039099	Glycoproteins
1718	16-cc 2b	GILT3	FBgn0039098	None
1719	16-cc 2b	glec	FBgn0015229	Trans-membrane proteins
1720	16-cc 2b	grk	FBgn0001137	Cytoskeletal
1721	16-cc 2b	grk	FBgn0001137	Major signaling pathways	EGFR and PVR RTK signaling pathway	ligand
1722	16-cc 2b	grk	FBgn0001137	Secreted proteins
1723	16-cc 2b	grk	FBgn0001137	Trans-membrane proteins
1724	16-cc 2b	grk	FBgn0001137	Matrisome	Homologs/Orthologs to Mammalian Matrisome-Associated Genes	Secreted Factors		EGFR Ligand
1725	16-cc 2b	Gs1	FBgn0001142	Metabolic	enzyme
1726	16-cc 2b	Gs1	FBgn0001142	Mitochondrial
1727	16-cc 2b	Gs1	FBgn0001142	Metabolic vs2
1728	16-cc 2b	GstE11	FBgn0034354	None
1729	16-cc 2b	Hex-A	FBgn0001186	Kinases	Non-protein Kinase
1730	16-cc 2b	Hex-A	FBgn0001186	Metabolic	enzyme
1731	16-cc 2b	Hex-A	FBgn0001186	Metabolic vs2
1732	16-cc 2b	Hnf4	FBgn0004914	Major signaling pathways	Nuclear hormone receptor
1733	16-cc 2b	Hnf4	FBgn0004914	Metabolic	enzyme
1734	16-cc 2b	Hnf4	FBgn0004914	Receptors
1735	16-cc 2b	Hnf4	FBgn0004914	Transcription factor/DNA binding	DNA-binding with transcription factor activity	zf-C4	High	TFscore=5
1736	16-cc 2b	Hnf4	FBgn0004914	Metabolic vs2
1737	16-cc 2b	hoip	FBgn0286786	None
1738	16-cc 2b	Hsromega	FBgn0001234	None
1739	16-cc 2b	Idgf4	FBgn0026415	Secreted proteins
1740	16-cc 2b	Idgf4	FBgn0026415	Matrisome	Drosophila Matrisome Genes	Apical Matrix		Cuticle; Chitinase-like
1741	16-cc 2b	Idgf6	FBgn0013763	Secreted proteins
1742	16-cc 2b	Idgf6	FBgn0013763	Matrisome	Drosophila Matrisome Genes	Apical Matrix		Chitinase-like
1743	16-cc 2b	InR	FBgn0283499	Metabolic vs2
1744	16-cc 2b	Jabba	FBgn0259682	Trans-membrane proteins
1745	16-cc 2b	Jheh1	FBgn0010053	Glycoproteins
1746	16-cc 2b	Jheh1	FBgn0010053	Human Disease	HuDis670
1747	16-cc 2b	Jheh1	FBgn0010053	Metabolic	enzyme
1748	16-cc 2b	Jheh1	FBgn0010053	Mitochondrial
1749	16-cc 2b	Jheh1	FBgn0010053	Trans-membrane proteins
1750	16-cc 2b	Jheh1	FBgn0010053	Metabolic vs2
1751	16-cc 2b	kay	FBgn0001297	Major signaling pathways	Imd pathway
1752	16-cc 2b	kay	FBgn0001297	Major signaling pathways	Planar Cell Polarity pathway
1753	16-cc 2b	kay	FBgn0001297	Major signaling pathways	TNF alpha signaling pathway	TF
1754	16-cc 2b	kay	FBgn0001297	Transcription factor/DNA binding	DNA-binding with transcription factor activity	bZIP	High	TFscore=1
1755	16-cc 2b	kay	FBgn0001297	Conserved in bilaterians/lost in nematodes
1756	16-cc 2b	lok	FBgn0019686	Human Disease	HuDis670
1757	16-cc 2b	lok	FBgn0019686	Kinases	Protein Kinase
1758	16-cc 2b	magu	FBgn0262169	Secreted proteins
1759	16-cc 2b	magu	FBgn0262169	Matrisome	Homologs/Orthologs to Mammalian Core Matrisome Genes	ECM Glycoproteins
1760	16-cc 2b	mnd	FBgn0002778	Major signaling pathways	Circadian Clock pathway	NCore
1761	16-cc 2b	mnd	FBgn0002778	Major signaling pathways	Toll pathway
1762	16-cc 2b	mnd	FBgn0002778	Trans-membrane proteins
1763	16-cc 2b	mnd	FBgn0002778	Transporters	Secondary Transporter	The Amino Acid-Polyamine-Organocation (APC) Family
1764	16-cc 2b	mnd	FBgn0002778	Metabolic vs2
1765	16-cc 2b	Myc	FBgn0262656	Major signaling pathways	INSULIN signaling pathway	TF
1766	16-cc 2b	Myc	FBgn0262656	Transcription factor/DNA binding	DNA-binding with transcription factor activity	HLH		TFscore=6
1767	16-cc 2b	Myc	FBgn0262656	Conserved in bilaterians/lost in nematodes
1768	16-cc 2b	NHP2	FBgn0029148	Human Disease	HuDis670
1769	16-cc 2b	NHP2	FBgn0029148	RNA-binding
1770	16-cc 2b	Nop56	FBgn0038964	Human Disease	HuDis670
1771	16-cc 2b	Npc2a	FBgn0031381	Human Disease	HuDis670
1772	16-cc 2b	Npc2a	FBgn0031381	Metabolic	other
1773	16-cc 2b	Npc2a	FBgn0031381	Secreted proteins
1774	16-cc 2b	Npc2a	FBgn0031381	Metabolic vs2
1775	16-cc 2b	Pdcd4	FBgn0030520	Conserved in bilaterians/lost in nematodes
1776	16-cc 2b	pdgy	FBgn0027601	Metabolic	enzyme
1777	16-cc 2b	pdgy	FBgn0027601	Mitochondrial
1778	16-cc 2b	pdgy	FBgn0027601	Peroxisomal
1779	16-cc 2b	pdgy	FBgn0027601	Metabolic vs2
1780	16-cc 2b	Pgm	FBgn0003076	Autophagy-related
1781	16-cc 2b	Pgm	FBgn0003076	Human Disease	HuDis670
1782	16-cc 2b	Pgm	FBgn0003076	Metabolic	enzyme
1783	16-cc 2b	Pgm	FBgn0003076	Metabolic vs2
1784	16-cc 2b	pre-rRNA-Psi:CR45856	FBgn0267516	None
1785	16-cc 2b	pyd	FBgn0262614	Kinases	Non-protein Kinase
1786	16-cc 2b	pyd	FBgn0262614	Metabolic	enzyme
1787	16-cc 2b	pyd	FBgn0262614	Metabolic vs2
1788	16-cc 2b	Rcc1	FBgn0002638	None
1789	16-cc 2b	retn	FBgn0004795	Transcription factor/DNA binding	DNA-binding with transcription factor activity	ARID	High	TFscore=5
1790	16-cc 2b	RpS20	FBgn0019936	Ribosome
1791	16-cc 2b	RpS20	FBgn0019936	RNA-binding
1792	16-cc 2b	RpS5b	FBgn0038277	Ribosome
1793	16-cc 2b	RpS5b	FBgn0038277	RNA-binding
1794	16-cc 2b	S	FBgn0003310	Major signaling pathways	EGFR and PVR RTK signaling pathway	other
1795	16-cc 2b	S	FBgn0003310	Trans-membrane proteins
1796	16-cc 2b	S	FBgn0003310	Methyltransferase				Source: domain annotation
1797	16-cc 2b	Samuel	FBgn0032330	Conserved in bilaterians/lost in nematodes
1798	16-cc 2b	skd	FBgn0003415	Transcription factor/DNA binding	Co-factor
1799	16-cc 2b	SpdS	FBgn0037723	Metabolic	enzyme
1800	16-cc 2b	SpdS	FBgn0037723	Peroxisomal
1801	16-cc 2b	SpdS	FBgn0037723	Methyltransferase				Source: domain annotation
1802	16-cc 2b	SpdS	FBgn0037723	Metabolic vs2
1803	16-cc 2b	spri	FBgn0085443	None
1804	16-cc 2b	stai	FBgn0266521	Cytoskeletal
1805	16-cc 2b	Syn1	FBgn0037130	Cytoskeletal
1806	16-cc 2b	Tao	FBgn0031030	Autophagy-related
1807	16-cc 2b	Tao	FBgn0031030	Kinases	Protein Kinase
1808	16-cc 2b	Tao	FBgn0031030	Receptors
1809	16-cc 2b	vig2	FBgn0046214	None
1810	16-cc 2b	Wdr62	FBgn0031374	None
1811	16-cc 2b	wisp	FBgn0260780	RNA-binding
1812	16-cc 2b	ZnT35C	FBgn0028516	Trans-membrane proteins
1813	16-cc 2b	ZnT35C	FBgn0028516	Transporters	Secondary Transporter	The Cation Diffusion Facilitator (CDF) Family
1814	16-cc 2b	zpg	FBgn0024177	Trans-membrane proteins
1815	16-cc 2b	zpg	FBgn0024177	Transporters	Ion Channels	The Gap Junction-forming Innexin (Innexin) Family
1816	16-cc 2b	zpg	FBgn0024177	Ion channel		Y
1817	16-cc 3	26-29-p	FBgn0250848	Glycoproteins
1818	16-cc 3	26-29-p	FBgn0250848	Mitochondrial
1819	16-cc 3	26-29-p	FBgn0250848	Matrisome	Homologs/Orthologs to Mammalian Matrisome-Associated Genes	ECM Regulators		Cathepsin
1820	16-cc 3	aay	FBgn0023129	Human Disease	HuDis670
1821	16-cc 3	aay	FBgn0023129	Metabolic	enzyme
1822	16-cc 3	aay	FBgn0023129	Phosphatases	Protein Phosphatase
1823	16-cc 3	aay	FBgn0023129	Metabolic vs2
1824	16-cc 3	ade3	FBgn0000053	Metabolic	enzyme
1825	16-cc 3	ade3	FBgn0000053	Metabolic vs2
1826	16-cc 3	Aldh	FBgn0012036	Autophagy-related
1827	16-cc 3	Aldh	FBgn0012036	Human Disease	HuDis670
1828	16-cc 3	Aldh	FBgn0012036	Metabolic	enzyme
1829	16-cc 3	Aldh	FBgn0012036	Mitochondrial
1830	16-cc 3	Aldh	FBgn0012036	Metabolic vs2
1831	16-cc 3	APC7	FBgn0029879	None
1832	16-cc 3	bru1	FBgn0000114	RNA-binding
1833	16-cc 3	bru1	FBgn0000114	Spliceosome
1834	16-cc 3	Cdk2	FBgn0004107	Kinases	Protein Kinase
1835	16-cc 3	Cdk4	FBgn0016131	Kinases	Protein Kinase
1836	16-cc 3	ced-6	FBgn0029092	None
1837	16-cc 3	CG10208	FBgn0039118	None
1838	16-cc 3	CG10863	FBgn0027552	Metabolic	enzyme
1839	16-cc 3	CG10863	FBgn0027552	Metabolic vs2
1840	16-cc 3	CG11267	FBgn0036334	Chaperone and heat shock proteins
1841	16-cc 3	CG11267	FBgn0036334	Mitochondrial
1842	16-cc 3	CG11674	FBgn0030551	Spliceosome
1843	16-cc 3	CG11674	FBgn0030551	Matrisome	Homologs/Orthologs to Mammalian Matrisome-Associated Genes	ECM Regulators		Cathepsin
1844	16-cc 3	CG11899	FBgn0014427	Human Disease	HuDis670
1845	16-cc 3	CG11899	FBgn0014427	Metabolic	enzyme
1846	16-cc 3	CG11899	FBgn0014427	Metabolic vs2
1847	16-cc 3	CG12177	FBgn0030510	None
1848	16-cc 3	CG12262	FBgn0035811	Human Disease	HuDis670
1849	16-cc 3	CG12262	FBgn0035811	Metabolic	enzyme
1850	16-cc 3	CG12262	FBgn0035811	Mitochondrial
1851	16-cc 3	CG12262	FBgn0035811	Metabolic vs2
1852	16-cc 3	CG12355	FBgn0040805	Mitochondrial
1853	16-cc 3	CG12355	FBgn0040805	Peroxisomal
1854	16-cc 3	CG12355	FBgn0040805	Trans-membrane proteins
1855	16-cc 3	CG14545	FBgn0040602	None
1856	16-cc 3	CG14647	FBgn0037244	Trans-membrane proteins
1857	16-cc 3	CG14647	FBgn0037244	Ubiquitin-related
1858	16-cc 3	CG14647	FBgn0037244	Conserved in bilaterians/lost in nematodes
1859	16-cc 3	CG15047	FBgn0030938	Ubiquitin-related
1860	16-cc 3	CG15093	FBgn0034390	Metabolic	enzyme
1861	16-cc 3	CG15093	FBgn0034390	Mitochondrial
1862	16-cc 3	CG15093	FBgn0034390	Metabolic vs2
1863	16-cc 3	CG15098	FBgn0034398	Trans-membrane proteins
1864	16-cc 3	CG15820	FBgn0035312	Peroxisomal
1865	16-cc 3	CG15820	FBgn0035312	Conserved in bilaterians/lost in nematodes
1866	16-cc 3	CG1665	FBgn0033451	Metabolic	other
1867	16-cc 3	CG1665	FBgn0033451	Mitochondrial
1868	16-cc 3	CG1665	FBgn0033451	Trans-membrane proteins
1869	16-cc 3	CG1665	FBgn0033451	Metabolic vs2
1870	16-cc 3	CG17029	FBgn0036551	Metabolic	enzyme
1871	16-cc 3	CG17029	FBgn0036551	Phosphatases	Non-protein Phosphatase
1872	16-cc 3	CG17029	FBgn0036551	Metabolic vs2
1873	16-cc 3	CG17919	FBgn0037433	Secreted proteins
1874	16-cc 3	CG18622	FBgn0038460	Trans-membrane proteins
1875	16-cc 3	CG1890	FBgn0039869	Chaperone and heat shock proteins
1876	16-cc 3	CG30377	FBgn0050377	Trans-membrane proteins
1877	16-cc 3	CG31937	FBgn0031360	Trans-membrane proteins
1878	16-cc 3	CG31937	FBgn0031360	Metabolic vs2
1879	16-cc 3	CG32473	FBgn0052473	Trans-membrane proteins
1880	16-cc 3	CG32625	FBgn0052625	None
1881	16-cc 3	CG3505	FBgn0038250	Glycoproteins
1882	16-cc 3	CG3770	FBgn0035085	Trans-membrane proteins
1883	16-cc 3	CG3770	FBgn0035085	Conserved in bilaterians/lost in nematodes
1884	16-cc 3	CG3831	FBgn0034804	Trans-membrane proteins
1885	16-cc 3	CG3902	FBgn0036824	Human Disease	HuDis670
1886	16-cc 3	CG3902	FBgn0036824	Metabolic	enzyme
1887	16-cc 3	CG3902	FBgn0036824	Mitochondrial
1888	16-cc 3	CG3902	FBgn0036824	Metabolic vs2
1889	16-cc 3	CG4570	FBgn0037844	Transcription factor/DNA binding	DNA-binding with transcription factor activity		Medium
1890	16-cc 3	CG5335	FBgn0034365	Matrisome	Homologs/Orthologs to Mammalian Matrisome-Associated Genes	ECM-affiliated		Galectin
1891	16-cc 3	CG6175	FBgn0036152	None
1892	16-cc 3	CG6287	FBgn0032350	Human Disease	HuDis670
1893	16-cc 3	CG6287	FBgn0032350	Metabolic	enzyme
1894	16-cc 3	CG6287	FBgn0032350	Metabolic vs2
1895	16-cc 3	CG6767	FBgn0036030	Kinases	Non-protein Kinase
1896	16-cc 3	CG6767	FBgn0036030	Metabolic	enzyme
1897	16-cc 3	CG6767	FBgn0036030	Metabolic vs2
1898	16-cc 3	CG8036	FBgn0037607	Autophagy-related
1899	16-cc 3	CG8036	FBgn0037607	Metabolic	enzyme
1900	16-cc 3	CG8036	FBgn0037607	Mitochondrial
1901	16-cc 3	CG8036	FBgn0037607	Metabolic vs2
1902	16-cc 3	CG8180	FBgn0034021	Glycoproteins
1903	16-cc 3	CG8180	FBgn0034021	Trans-membrane proteins
1904	16-cc 3	CG9752	FBgn0034614	None
1905	16-cc 3	CR43264	FBgn0262945	None
1906	16-cc 3	dhd	FBgn0011761	Metabolic	enzyme
1907	16-cc 3	dhd	FBgn0011761	Metabolic vs2
1908	16-cc 3	eEF2	FBgn0000559	RNA-binding
1909	16-cc 3	Eip55E	FBgn0000566	Human Disease	HuDis670
1910	16-cc 3	Eip55E	FBgn0000566	Metabolic	enzyme
1911	16-cc 3	Eip55E	FBgn0000566	Metabolic vs2
1912	16-cc 3	fabp	FBgn0037913	Mitochondrial
1913	16-cc 3	fabp	FBgn0037913	Transporters	Secondary Transporter	The Mitochondrial Carrier (MC) Family
1914	16-cc 3	fabp	FBgn0037913	Metabolic vs2
1915	16-cc 3	fok	FBgn0263773	None
1916	16-cc 3	fs(1)Ya	FBgn0000927	Transcription factor/DNA binding	DNA-binding with transcription factor activity		Medium
1917	16-cc 3	GILT2	FBgn0039099	Glycoproteins
1918	16-cc 3	GILT3	FBgn0039098	None
1919	16-cc 3	Gip	FBgn0011770	Metabolic	enzyme
1920	16-cc 3	Gip	FBgn0011770	Mitochondrial
1921	16-cc 3	Gip	FBgn0011770	Receptors
1922	16-cc 3	Gip	FBgn0011770	Metabolic vs2
1923	16-cc 3	gnu	FBgn0001120	None
1924	16-cc 3	GstD1	FBgn0001149	Metabolic	enzyme
1925	16-cc 3	GstD1	FBgn0001149	Metabolic vs2
1926	16-cc 3	GstO1	FBgn0035907	Metabolic vs2
1927	16-cc 3	GstT3	FBgn0031117	Metabolic	enzyme
1928	16-cc 3	GstT3	FBgn0031117	Metabolic vs2
1929	16-cc 3	hoip	FBgn0286786	None
1930	16-cc 3	Hsp83	FBgn0001233	Chaperone and heat shock proteins
1931	16-cc 3	Hsp83	FBgn0001233	Mitochondrial
1932	16-cc 3	Hsp83	FBgn0001233	Metabolic vs2
1933	16-cc 3	Hsromega	FBgn0001234	None
1934	16-cc 3	Idgf2	FBgn0020415	Secreted proteins
1935	16-cc 3	Idgf2	FBgn0020415	Matrisome	Drosophila Matrisome Genes	Apical Matrix		Chitinase-like
1936	16-cc 3	Idgf4	FBgn0026415	Secreted proteins
1937	16-cc 3	Idgf4	FBgn0026415	Matrisome	Drosophila Matrisome Genes	Apical Matrix		Cuticle; Chitinase-like
1938	16-cc 3	Idgf6	FBgn0013763	Secreted proteins
1939	16-cc 3	Idgf6	FBgn0013763	Matrisome	Drosophila Matrisome Genes	Apical Matrix		Chitinase-like
1940	16-cc 3	Inos	FBgn0025885	Metabolic	enzyme
1941	16-cc 3	Inos	FBgn0025885	Metabolic vs2
1942	16-cc 3	Jabba	FBgn0259682	Trans-membrane proteins
1943	16-cc 3	Jheh1	FBgn0010053	Glycoproteins
1944	16-cc 3	Jheh1	FBgn0010053	Human Disease	HuDis670
1945	16-cc 3	Jheh1	FBgn0010053	Metabolic	enzyme
1946	16-cc 3	Jheh1	FBgn0010053	Mitochondrial
1947	16-cc 3	Jheh1	FBgn0010053	Trans-membrane proteins
1948	16-cc 3	Jheh1	FBgn0010053	Metabolic vs2
1949	16-cc 3	LamC	FBgn0010397	Human Disease	HuDis670
1950	16-cc 3	LamC	FBgn0010397	Mitochondrial
1951	16-cc 3	Mcm3	FBgn0284442	None
1952	16-cc 3	Mcm7	FBgn0020633	None
1953	16-cc 3	mnd	FBgn0002778	Major signaling pathways	Circadian Clock pathway	NCore
1954	16-cc 3	mnd	FBgn0002778	Major signaling pathways	Toll pathway
1955	16-cc 3	mnd	FBgn0002778	Trans-membrane proteins
1956	16-cc 3	mnd	FBgn0002778	Transporters	Secondary Transporter	The Amino Acid-Polyamine-Organocation (APC) Family
1957	16-cc 3	mnd	FBgn0002778	Metabolic vs2
1958	16-cc 3	mRRF1	FBgn0035980	Mitochondrial
1959	16-cc 3	NHP2	FBgn0029148	Human Disease	HuDis670
1960	16-cc 3	NHP2	FBgn0029148	RNA-binding
1961	16-cc 3	Nop56	FBgn0038964	Human Disease	HuDis670
1962	16-cc 3	Npc2a	FBgn0031381	Human Disease	HuDis670
1963	16-cc 3	Npc2a	FBgn0031381	Metabolic	other
1964	16-cc 3	Npc2a	FBgn0031381	Secreted proteins
1965	16-cc 3	Npc2a	FBgn0031381	Metabolic vs2
1966	16-cc 3	osk	FBgn0003015	Cytoskeletal
1967	16-cc 3	PCNA	FBgn0005655	Metabolic	enzyme
1968	16-cc 3	PCNA	FBgn0005655	Metabolic vs2
1969	16-cc 3	pgc	FBgn0016053	None
1970	16-cc 3	Pgm	FBgn0003076	Autophagy-related
1971	16-cc 3	Pgm	FBgn0003076	Human Disease	HuDis670
1972	16-cc 3	Pgm	FBgn0003076	Metabolic	enzyme
1973	16-cc 3	Pgm	FBgn0003076	Metabolic vs2
1974	16-cc 3	Phf7	FBgn0031091	None
1975	16-cc 3	pre-rRNA-Psi:CR45856	FBgn0267516	None
1976	16-cc 3	Prip	FBgn0033635	Trans-membrane proteins
1977	16-cc 3	Prip	FBgn0033635	Transporters	Ion Channels	The Major Intrinsic Protein (MIP) Family
1978	16-cc 3	Prip	FBgn0033635	Ion channel		Y
1979	16-cc 3	r-l	FBgn0003257	Human Disease	HuDis670
1980	16-cc 3	r-l	FBgn0003257	Metabolic	enzyme
1981	16-cc 3	r-l	FBgn0003257	Metabolic vs2
1982	16-cc 3	Rcc1	FBgn0002638	None
1983	16-cc 3	rdx	FBgn0264493	Ubiquitin-related
1984	16-cc 3	regucalcin	FBgn0030362	Glycoproteins
1985	16-cc 3	regucalcin	FBgn0030362	Mitochondrial
1986	16-cc 3	regucalcin	FBgn0030362	Secreted proteins
1987	16-cc 3	regucalcin	FBgn0030362	Conserved in bilaterians/lost in nematodes
1988	16-cc 3	regucalcin	FBgn0030362	Metabolic vs2
1989	16-cc 3	RpS20	FBgn0019936	Ribosome
1990	16-cc 3	RpS20	FBgn0019936	RNA-binding
1991	16-cc 3	RpS3A	FBgn0017545	Mitochondrial
1992	16-cc 3	RpS3A	FBgn0017545	Ribosome
1993	16-cc 3	RpS5b	FBgn0038277	Ribosome
1994	16-cc 3	RpS5b	FBgn0038277	RNA-binding
1995	16-cc 3	SmydA-1	FBgn0033917	Methyltransferase				Source: FlyBase gene group
1996	16-cc 3	Sod3	FBgn0033631	Glycoproteins
1997	16-cc 3	Sod3	FBgn0033631	Secreted proteins
[truncated: 5,001 more rows]
