# Supplementary material for: A single-cell atlas reveals unanticipated cell type complexity in Drosophila ovaries
Source: HighWire-hosted journal article supplement (doi:10.1101/gr.274340.120), 2021-08-13
Supplement: Supplemental_Text.docx [file Supplemental_Text.docx]

# Supplemental Text

## Comparison of five independent scRNA-seq studies

Two recent studies have performed scRNA-seq analyses of *Drosophila* adult ovaries (Jevitt et al. 2020, Rust et al. 2020). Each study had a different focus and approach. We focused on the stem cell compartment and early stages of oogenesis. We analyzed 15,227 transcriptomes from 5 replicates. We first separated transcriptomes by major cell groups in the ovary: GCs, epithelial FCs and somatic cells of the germarium including stalk and polar cells. We further subclustered each group to uncover biologically relevant clusters based on previous knowledge. Thanks to stepwise clustering, we were able to identify 9 distinct stages of GC differentiation and distinguish anterior and posterior terminal FC transcriptomes as early as stage 5 of oogenesis. In total, we obtained 34 clusters.

Similarly, Rust *et al*. focused on the stem cell compartment and early-to-mid stages of oogenesis, and analyzed 14,173 transcriptomes from 3 replicates. Rust *et al.* obtained 26 clusters using clustering in CellFindR, an adaptation of Seurat. CellFindR clusters the transcriptomes iteratively - first on the entire dataset, and further on each cluster, producing a hierarchical tree of clusters. They relied on Monocle for further analyses of GSC and FSC differentiation.

Jevitt *et al.* sequenced the entire ovary and connected tissues, including muscle sheath and oviduct. They analyzed 7053 high quality transcriptomes from a single replicate and used an additional replicate for validation of clustering. For analyses, Jevitt *et al.* relied on clustering using Seurat to obtain 32 clusters. Because FCs are by far the most abundant cell type in the ovary, 22 clusters corresponded to epithelial FCs, and only two corresponded to GCs and one contained TFs, CCs and ECs. In addition to stages described in our study, they characterized also FCs from late stages of oogenesis, corpus luteum, oviduct and other tissues. To describe gene expression dynamics during GSC differentiation they relied on Monocle (Qiu et al. 2017). Furthermore, using Monocle they characterized FSC differentiation into stalk and polar cells, and explored the terminal and main body FC dichotomy of epithelial FCs.

Additional two studies performed scRNA-seq solely on somatic cells of the germarium (Shi et al. 2020; Tu et al. 2020). Both studies relied on Gal4-driven GFP expression for target cell isolation. Tu *et al*. analyzed ECs and FSCs/pre-FCs, and identified four distinct EC subtypes (named IGS1-4), while cluster IGS5 corresponded to FSC/pre-FC population. Shi *et al*. identified two EC subtypes (aEC and pEC) and included also a FC cluster in their analyses.

To compare the studies, we integrated all the datasets and created a UMAP (Supplemental Figure S8A). Most clusters aligned very well to the corresponding clusters from other studies (Supplemental Figure S8B-H). For example, GCs from all studies formed three clusters - with clusters representing early stages of differentiation in one group (Supplemental Figure S8B, lower left) and later stages (Supplemental Figure S8B, on top). Somatic cells of germarium from ours, Rust *et al*., and Jevitt *et al*. were all displayed together on the UMAP (Supplemental Figure S8C). A large fraction of cells from Shi *et al.* and Tu *et al*. also clustered in the same region on the UMAP, but others were intermixed with all stages of FCs (Supplemental Figure S8C-H). Cells from follicle cell lineages also aligned very well, the FSC and pre-FC containing clusters were clustered together, while polar cells from all three studies formed a separate cluster (Supplemental Figure S8D). Epithelial FCs from stage 2-4/5 follicles were all clustered closely together, with only a few cells spreading towards slightly later stage FCs (Supplemental Figure S8E). We did not observe a good segregation of stage 5/6-7 AT, PT and MBFCs from the three studies (Supplemental Figure S8F), and observed also that the integration of FCs of all datasets is imperfect (Supplemental Figure S8A). Integration was even poorer among Stage 8-10 FCs (Supplemental Figure S8G, H). Thus, the batch effect correction has not achieved full integration of the datasets (Supplemental Figure S8A).

Therefore, to better compare all studies, we compared the cluster markers between all datasets. To enable fair comparison between studies, we merged all clusters from our study into a single dataset instead of keeping groups isolated. Thus, markers for cell groups are computed in comparison to all cell types instead of isolated cluster groups (for example, we recover markers distinguishing GC clusters from each other but not from other cell types unless we merge all three cluster groups). Unfortunately, we were unable to perform the same analyses with datasets from Shi *et al*. and Tu *et al*., since they contain only a few cell types.

We computed markers for each cluster from individual datasets using identical parameters and selected the top 50 markers using adjusted p-value as selection criteria. Next, we computed marker overlap between the clusters and the statistical significance of the overlap (Supplemental Figure S9). The largest and most significant overlap was, indeed, observed between the clusters that are supposed to correspond to each other. For example, our germ cell clusters shared most markers with germ cells clusters from Rust *et al*. and Jevitt *et al*. EC clusters and early FC lineage clusters were in a good agreement between our study and Rust *et al*. IGS2-5 clusters from Tu *et al*. also showed some overlap with EC cluster and FSC and/or pre-FC clusters from our study and Rust *et al*. IGS1 cluster from Tu *et al*. had a very strong overlap with aEC cluster from Shi *et al*., but did not show strong overlap with EC clusters from ours and Rust *et al*. studies. The overlap between our and Rust *et al*. datasets was stronger than with Shi *et al*. which could be at least partially explained by the fact that marker computation for Shi *et al*. and Tu *et al*. were done primarily against the EC population, thus, pan-EC specific genes cannot be selected while they could be identified in ours and Rust *et al*. studies. pEC and FC clusters from Shi *et al*. showed the strongest similarity to clusters containing Vitellogenic MBFCs (Stage 9-10A) from Jevitt *et al*. Therefore, it is plausible that Shi *et al*. have included some FCs in their pEC cluster as well. Many epithelial FCs clusters showed the strongest and most significant overlap with corresponding clusters from the other two studies. Altogether, the three studies sequencing entire ovaries (ours, Rust *et al*. and Jevitt *et al*.) showed the highest similarity compared to the other two (Shi *et al*. and Tu *et al*.). This could be because we were unable to detect pan-EC markers in the Shi *et al*. and Tu *et al*. studies due absence of other cell types because sample preparation.

Since the aims and cell selection strategies were shared between ours, Rust *et al*., and Jevitt *et al*. studies, we performed in-depth marker comparison between the three studies. Rust *et al*. and Jevitt *et al*., both identified a list of markers that distinguish their clusters or cluster groups from each other. To determine how reproducible the ovarian scRNA-seq experiments are, we assessed Jevitt *et al.* and Rust *et al.* marker gene expression in our dataset. We plotted their expression in our dataset and shaded the expected expression pattern in grey (Figure S10). Marker genes provided by Rust *et al*., were expressed in expected cell types in our dataset (Figure S10Ai), with the exception of Sox14 which in addition to the expected expression in a subset of FCs, was expressed also in a few germarium soma clusters. Markers from Jevitt *et al*., also largely corresponded to the expected cell types. However, a large fraction were expressed in late stage follicle cells and other tissues that are not present in our dataset, therefore, we did not observe specific expression in our clusters (Figure S10Aii).

In Jevitt *et al.* GCs were split in 2 clusters, and pseudotime analyses provided early stage (before 16-cell cyst formation) and late stage (after 16-cell cyst formation) enriched genes. The gene expression fits the suggested pattern well, with a slight shift towards later stages, suggesting that Jevitt *et al.* 'early' markers are expressed also in 16-cell cysts in region 2a or 2b, and late marker genes are upregulated in region 2b or 3 of the germarium (Figure S10Bi). Rust *et al.* obtained three GC clusters - 'GSC', 'undifferentiated' and 'older' GCs. Their GSC markers were well expressed in our GSC/CB/2-cc cluster, 'undifferentiated' in 4-cell and 8-cell cysts, and 'older' in 16-cell cysts (Figure S10Bii). The markers from Rust *et al.* pseudotime analyses, were also in close accordance with our data with only slight shifts in stages (Figure S10Biii). GSC marker gene visualization by Rust *et al*. revealed that the expression of those genes was not restricted solely to GSCs and extended further posterior into region 1 of germarium, suggesting that their 'GSC' cluster may contain cysts in addition to GSCs, similar to our study. Altogether, the analyses of gene expression dynamics during GC differentiation are in close concordance between ours and the two recent studies.

Next, we visualized markers of the germarial somatic cells from Rust *et al*. Most of the TF and CC markers were well expressed in our TF/CC cluster, except *Tsp42Ek* which was barely detectable in our dataset (Figure S10Ci). Rust *et al.* clustering produced three EC subtypes - anterior, central and posterior similar to our study. Of 32 markers provided to distinguish between the EC subtypes, 17 were expressed in accordance with our data/clustering (Figure S10Ciii, in bold), and 15 were either expressed at similar levels in all three EC cluster, or in cluster combinations different to what was reported in Rust *et al.*, with most discrepancies observed among cEC and pEC markers (Figure S10Ciii). Therefore, the overall trend of anterior to posterior gradient of EC transcription profiles was identified in both studies, but the exact cluster boundaries and a fraction of markers identified were different between the studies.

Rust *et al.* performed pseudotime analyses using Monocle to identify FSCs and their markers. All proposed FSC markers were expressed in ECs as well, and we observed similar results (Figure S510ii). The majority of putative FSC marker genes were, indeed, enriched in the earliest differentiation steps according to our FSC differentiation pseudotime analyses (Figure S10Cvi). Thus, FSC differentiation pseudotime analyses were highly comparable between both studies. Importantly, neither study identified highly specific FSC markers, likely due to low FSC number in the datasets or because FSC and neighboring cell gene expression profiles are highly similar.

Rust *et al.* identified polar and stalk cells by clustering, and their markers were highly specific to polar and pre-stalk/stalk cell clusters in our dataset (Figure S10Civ). Monocle pseudotime analyses successfully identified polar and stalk cell enriched genes in Jevitt *et al.* The polar cell enriched genes were highly expressed in polar cell cluster, with a few somewhat expressed also in pre-stalk/stalk lineage (Figure S10Cv), and stalk cell enriched genes were expressed in the pre-stalk/stalk lineage, with exception of CG43134 which was barely detectable in the cell types of interest (Figure S10Cv). Altogether, the stalk and polar cell markers were in concordance between ours and other studies, and marker identification using Seurat yielded highly specific markers.

The largest cell population in all studies were epithelial follicle cells, which we subclustered into 17 subtypes according to their gene expression profiles, and the subtypes corresponded to different stages of oogenesis and different anatomical positions within the follicle. Jevitt *et al.* provided markers for mitotic (stage 2-5/6) and endocycling FCs, and pseudotime analyses of main body vs. terminal FC differentiation branches. The markers of mitotic FCs were, indeed, enriched in FCs up to stage 6, while endocycling FC markers were expressed starting from stage 8 follicles, with exception of *peb*, which was expressed slightly earlier as well (Figure S10Di). A large fraction of markers identified in the pseudotime analyses displayed ubiquitous expression and were only slightly enriched in the expected clusters (Figure S10Diii), and, therefore, cannot serve as reliable markers. Rust *et al.* provided 11 epithelial follicle cell clusters and their marker expression corresponded very well to the expected clusters in our dataset (Figure S10Dii). Similarly, as for stalk and polar cells, epithelial FC markers identified using Seurat were in concordance between the independent studies, while markers identified using Monocle pseudotime analyses had broader expression patterns.

To match transcriptomes to cell types or differentiation stages *in vivo*, Jevitt *et al.* and Rust *et al.* relied on marker gene visualization using GFP insertions and Gal4 driver lines (GFP or Gal4 inserted downstream the marker gene promoter) or antibody stainings, which provide a proxy to gene expression *in situ*, however, it can be skewed by promoter accessibility, translation regulation and protein perdurance. Our previous studies show that *Gal4* driver line expression from a specific promoter often is sparse and broader compared to endogenous mRNA expression (Slaidina et al. 2020), therefore, we relied solely on *in situ* visualization of marker mRNAs using HCR. Since scRNA-seq measures the mRNA levels, direct visualization of mRNA enables the most accurate cluster assignments in space and time.

Our study provided the highest clustering granularity. This allowed us to identify specific markers for AT, PT and MBFCs as early as at stage 5-6 follicles, as well as stage specific markers. Markers for such cell categories were missed in the other two studies likely due to different bioinformatic approaches.

## Supplemental methods

### Fly husbandry

*w1118* flies were used for all stainings. *w1118; P[His2AV]62A* (Clarkson and Saint 1999) (BDSC #5941) flies crossed to *w1118* were used for all scRNA-seq experiments. Flies were raised on medium containing yeast, molasses and cornmeal, and kept at 25oC. Adult females were fattened on yeast for 24-48 hours prior to dissections.

### Ovary dissociation methods

Method A: For dissociation, anterior tips of ovaries were incubated in dissociation solution (0.5% Type I Collagenase (Thermo Fisher Scientific #17018029), 1% Trypsin 1:250 (Thermo Fisher Scientific #27250018) in DPBS) for 15 minutes with gentle rotation. The suspension was vigorously pipetted multiple times during the dissociation to enhance the dissociation efficiency. Enzymatic dissociation was stopped by adding Schneider cell culture media (Thermo Fisher Scientific # 21720-001) with 10% fetal bovine serum (Invitrogen #10082-147) (S-FBS). Starting from this step, all plastic materials – pipet tips, tubes, filters – were coated with S-FBS. Cell suspension was filtered through a custom-made ~40-micron cell strainer. The strainer was built by securing nylon mesh (Component Supply #U-CMN-40) in a cap of a 0.2 ml PCR tube and cutting the bottom of the tube and the cap (Slaidina et al. 2020). Upon filtering, dissociated cells were purified by fluorescence activated cell sorting (FACS) using a 100-micron nozzle on Sony SY3200 Cell Sorter. Cell suspension was centrifuged for 5 minutes at 250 rcf at RT, and resuspended in S-FBS.

Method B: For dissociation, anterior tips of ovaries we transferred to a 1.5 ml tube and were incubated in dissociation solution (0.25 mg/ml Type I Collagenase, 0.4 mg/ml elastase (Worthington Biochemical #LS002290) in Cell Dissociation Buffer (Thermo Fisher Scientific #13151014)) for 30 minutes with gentle rotation. The suspension was vigorously pipetted every 5 minutes during the dissociation to enhance the dissociation efficiency. Enzymatic dissociation was stopped by adding Schneider cell culture media with fetal bovine serum (S-FBS). Starting from this step, all plastic materials – pipet tips, tubes, filters – were coated with S-FBS. Cell suspension was filtered through a 70-micron filter (Miltenyi Biotec #130-095-823), and 30 micron filter (Miltenyi Biotec #130-041-407). Cell suspension was centrifuged for 5 minutes at 3500 rcf at 4oC. Cells were resuspended in 0.04% ultrapure BSA (Thermo Fisher Scientific #AM2616) in DBPS.

### Library preparation and sequencing

For scRNA-seq library preparation we used 10x Genomics Chromium Single Cell 3’ reagent Kits v2 for Method A (samples 1 and 2), and v3 for Method B (samples 3, 4 and 5) following the manufacturer's protocol. Sample 1 and 2 libraries were sequenced on paired-end 26/98 Illumina HiSeq 4000, and sample 3, 4, and 5 libraries on paired-end 28/91 NovaSeq 6000 runs.

### 10x Genomics data preprocessing

Per-read per-sample FASTQ files were generated using the Illumina bcl2fastq Conversion software (v2.20) to convert BCL base call files outputted by the sequencing instrument into the FASTQ format.

The 10x Genomics analysis software, Cell Ranger (v2.1.0 for samples 1 and 2, and v3.0.0 for samples 3,4 and 5), specifically the “cellranger count” pipeline, was used to process the FASTQ files in order to align reads to the *Drosophila melanogaster* reference genome (dm6) (Santos et al. 2015) and generate gene-barcode expression matrices. The output of multiple samples from the “cellranger count” pipeline were aggregated using the “cellranger aggr” pipeline of Cell Ranger, normalizing the combined output to the same sequencing depth and recomputing the gene-barcode matrices and expression analysis accordingly for the aggregated data.

## Quality Control and Filtering

We used two methods for sample preparation. Rearing of the animals, genetic backgrounds and dissections were identical in both methods, but we used different concentrations and combinations of enzymes for cell dissociation. Furthermore, in method A (samples 1 and 2), we used FACS to obtain cell suspension devoid of large debris and cell aggregates. In method B (samples 3-5), we relied on sequential filtering through the 70-micron and 30-micron filters. Finally, the libraries were prepared using 10X Genomics Chromium kit v2 in method A, and v3 in method B. The third generation (v3) kit has increased transcript capture rate and allows capturing higher number of transcripts per cell. Sample 1 and 2 were prepared and sequenced independently on different days, while samples 3, 4, and 5 were all processed and sequenced in parallel on the same day. Because of lower number of cells/transcriptomes captured, the samples 1 and 2 (1955 and 1052 cells) were sequenced to higher saturation (78 and 81%) than samples 3, 4, and 5 (7192, 7794, 8559 cells, and 26-29% sequencing saturation). As a result, the highest numbers of transcripts and genes were detected in sample 2 and 1, despite presumably higher transcript capture rate with v3 kit. We observed strikingly higher mitochondrial read fraction in samples 3, 4 and 5, a hallmark of damaged cells. It is unclear whether this is caused by increased sensitivity of the v3 kit, harsher cell dissociation conditions, or it is a phenomenon of a single experiment. Nevertheless, we filtered out damaged cells using 5% mitochondrial read fraction as a cut off. Similarly, we filtered out potential doublets using sample specific cutoffs for transcripts and genes detected per cell (sample 1 - 40,000 transcripts, 4000 genes; sample 2 - 75,000 transcripts, 5500 genes; sample 3 - 4000 genes, 25,000 transcripts; sample 4 - 3500 genes, 25,000 transcripts; samples 5 - 3500 genes, 25,000 transcripts). After selecting high quality transcriptomes, our dataset contained high quality transcriptomes of 15227 ovarian cells.

### scRNA-seq data analysis

Gene expression is log-normalized using a scale factor of 10.000 molecules for each cell, and further standardized for each gene across all cells (z-score transformed) (Stuart et al., 2019). Plots indicating gene expression show the z-score transformed expression. scRNA-seq datasets were integrated (aligned) using Seurat v3 (Stuart et al. 2019). We followed the Seurat v3 guidelines for identification of variable genes, dimensionality reduction and cell clustering.

To find markers, we used Wilcox statistical test built in Seurat 3 (Stuart et al. 2019). To select markers for visualization using HCR, we assessed their expression levels in cluster of interest and other clusters (Supplemental Fig. S2). We assured that GC markers were absent or expressed at very low levels in ECs or early FC lineages, and vice versa. Transcriptional signatures consisted of all positive cluster markers computed with 0.25 log fold change threshold. We used *pheatmap* package to generate heatmaps; gene expression levels were scaled by row. For all marker gene heatmaps, if a gene was assigned as a marker to multiple clusters, it was visualized in heatmaps only once, together with the markers of the first cluster according to our cluster order. For example, a marker for 4-cc and 8-cc, was visualized together with 4-cc markers.

## Manual splitting of FC clusters

Upon clustering of FCs, we obtained 15 clusters, with boundaries roughly corresponding to stage and anatomical position boundaries with two exceptions. First, a single cluster contained the anterior terminal cells of stages 5, 6, and 7. Because the transcriptional signatures of St5-6 and St7 are clearly distinct (Figure 4C), and *CycB* expression distinguished the stages 5-6 and 7, we manually subdivided this cluster into AT St5-6 and AT S7. Similarly, a single cluster contained posterior terminal cell of stages 6 and 7, and we manually split the cluster in two - PT St6 and PT St7. While other clusters largely contained cells of a distinct stage and type, some did extend over the FC subtype and/or stage boundaries. For example, the cluster MB St6 contain some PT St6 cells, and MB St9 contain some PT St9 cells. Cluster AT St8-9 contains a number of cell types - stretch cells, border cells and centripetal cells. However, the border cell and centripetal cell number is very low, as can be seen by their marker *slbo* expression (Figure S4A). Assessing gene expression patterns in feature plots in Figure S4A allows examination of exact gene expression profiles independently of clustering.

## Monocle pseudotime analyses

We used Monocle 2 for pseudotime analyses of FSC differentiation (Qiu et al. 2017) using standard workflow. We analyzed transcriptomes only from FSC/pre-FC, pre-stalk, stalk and polar cell cluster, and randomly selected 50 cells from St2-4 I and 50 cells from St2-4 II cluster from samples 3, 4 and 5. Clusters St2-4 I and St2-4 II contain many more cells, and we selected only a small fraction such that the cell number is similar to other clusters and the analyses are not overwhelmed by cells with the epithelial fate. These sample were processed in parallel on the same day, and thus, we were able to avoid possible batch effects in our analyses.

### RNA *in situ* hybridization and immunofluorescence

All steps were done in using RNase free reagents and supplies with gentle rotation, except for steps at 37oC. Specimens were fixed in 0.1% Tween 20 (Tw), 4% Paraformaldehyde (PFA) (Electron Microscopy Sciences #15713) in DPBS for 20 minutes at RT, washed twice with 0.1% Tw in DPBS at room temperature (RT), dehydrated with sequential washes with 25%, 50%, 75% and 100% ethanol in DPBS on ice 5 minutes each. Samples were stored at -20oC at least overnight (up to 7 days). Samples were rehydrated with sequential washes with 100%, 75%, 50% and 25% ethanol in DPBS on ice, permeated for 2 hours in 1% Triton X- 100 (Tx) DPBS at RT, post-fixed in 0.1% Tw, 4% PFA in DPBS for 20 minutes at RT, washed twice with 0.1% Tw in DPBS for 5 minutes on ice, washed with 0.1% Tw 0.5× DPBS 2.5×SSC (Thermo Fisher Scientific #AM9770) for 5 minutes on ice, washed twice with 5×SSCT (0.1% Tw in 5×SSC) for 5 minutes on ice, incubated in probe hybridization buffer for 5 minutes on ice, pre-hybridized in probe hybridization buffer for 30 minutes at 37 oC, and hybridized in probe solution overnight (16 – 24 hours) at 37oC. Probe solution was prepared by adding probes to pre-warmed probe hybridization solution. Probe concentrations were determined empirically, and ranged 4-8 pmol of each probe in 1 ml. After hybridization, specimens were washed 4 times with probe wash buffer for 15 minutes each at 37oC, and twice with 5×SSCT for 5 minutes each at RT. Specimens were equilibrated in amplification buffer for 5 minutes at RT. Hairpin solutions were prepared by heating 30 pmol of each hairpin for 90 seconds at 95oC and cooling at RT in a the dark for 30 minutes, and subsequently adding the snap-cooled hairpins to 500 μl of amplification buffer at RT. Specimens were incubated in hairpin solution overnight (~16 hours) at RT, and washed multiple times with 5×SSCT – twice for 5 minutes, twice for 30 minutes and once for 5 minutes. If samples were not subjected to immunofluorescence staining, Dapi was added to the first 30 minute wash, and incubated in mounting media after completing all washes. For immunofluorescence samples were blocked in 0.1% Tw, 5% normal goat serum (NGS) (Jackson ImmunoResearch #005-000-121) in PBS at RT for 2 hours. Primary antibody was diluted in 0.1% Tw, 5% NGS in PBS and incubated for 2h at RT or 4 oC overnight. Subsequently, specimens were washed in 0.1% Tw in PBS times for 20 minutes in RT and in 0.1% Tw, 5% NGS in PBS twice for 30 minutes. Secondary antibody and Dapi (10 μg/ml for mounting in Vectashield, and 100 μg/ml for mounting in Slowfade Diamond) was diluted in 0.1% Tw, 5% NGS in PBS and incubated for 2h at RT or 4 oC overnight. Subsequently, specimens were washed in 0.1% Tw in PBS four times for 20 minutes in RT. Finally, specimens were equilibrated in Slowfade Diamond (Thermo Fisher Scientific #S36963) or Vectashield (Vector Labs Inc #H-1000) mounting medium at 4 oC overnight (or longer) and mounted in Slowfade Diamond or Vectashield mounting media. Primary antibody - anti--Spectrin (DSHB #3A9, concentrated) dilution 1:200, anti-pERK (Phospho-p44/42MAPK from Cell Signaling Technology) dilution 1:100, guinea pig anti-pMad (from Dr. Edward Laufer) dilution 1:500. Secondary antibodies were procured from Jackson ImmunoResearch Laboratories, Inc.

### Imaging

Imaging was performed using Zeiss LSM 800 and Zeiss LSM 780 confocal microscopes using 40× oil NA 1.3 objectives.

## Marker gene descriptions

List of marker genes used in this study with brief function annotations.

| gene | symbol | gene name | known/predicted function | annotation symbol |
| --- | --- | --- | --- | --- |
| AdamTS-A | AdamTS-A | ADAM metallopeptidase with thrombospondin type 1 motif A | secreted matrix metalloprotease involved in cell migration | CG14869 |
| Amph | Amph | Amphiphysin | phospholipid binding | CG8604 |
| Asph | Asph | Aspartyl beta-hydroxylase | peptide-aspartate beta-dioxygenase | CG8421 |
| bam | bam | bag of marbles | GC differentiation regulator | CG10422 |
| bond | bond | james bond | very long chain fatty acid elongase | CG6921 |
| cas | cas | castor | transcription factor | CG2102 |
| CG10073 | CG10073 | - | -- | CG10073 |
| CG10311 | CG10311 | - | -- | CG10311 |
| CG10924* | Pepck1 | Phosphoenolpyruvate carboxykinase 1 | enzyme in carbohydrate biosynthesis; gluconeogenesis | CG17725 |
| CG10924* | Pepck2 | Phosphoenolpyruvate carboxykinase 2 | - | CG10924 |
| CG1136 | CG1136 | - | -- | CG1136 |
| CG15398* | Trf5 | TBP-related factor 5 | transcription regulator | CG15398 |
| CG15546 | CG15546 | - | -- | CG15546 |
| CG15628 | CG15628 | - | -- | CG15628 |
| CG17270 | CG17270 | - | -- | CG17270 |
| CG2887 | CG2887 | - | -- | CG2887 |
| CG31431 | CG31431 | - | -- | CG31431 |
| CG31808 | CG31808 | - | -- | CG31808 |
| CG34377 | CG34377 | - | -- | CG34377 |
| CG3961 | CG3961 | - | long-chain fatty acid-CoA ligase | CG3961 |
| CG5002 | CG5002 | - | sulfate transmembrane transporter | CG5002 |
| CG6044 | CG6044 | - | -- | CG6044 |
| CG6628 | CG6628 | - | -- | CG6628 |
| CG7255 | CG7255 | - | amino acid transmembrane transporter | CG7255 |
| CG8303 | CG8303 | - | catalyzes the reduction of C16 or C18 fatty acyl-CoA to fatty alcohols | CG8303 |
| cry | cry | cryptochrome | G protein-coupled photoreceptor, regulates circadian rhythm | CG3772 |
| ct | ct | cut | transcription factor | CG11387 |
| dpp | dpp | decapentaplegic | TGFβ signaling pathway (BMP) ligand | CG9885 |
| en | en | engrailed | transcription factor | CG9015 |
| eya | eya | eyes absent | transcription cofactor | CG9554 |
| Fas3 | Fas3 | Fasciclin 3 | cell adhesion molecule | CG5803 |
| fax | fax | failed axon connections | -- | CG4609 |
| H15 | H15 | H15 | transcription factor | CG6604 |
| hh | hh | hedgehog | Hh signaling pathway ligand | CG4637 |
| Hk | Hk | Hyperkinetic | beta-subunit of Sh K[+] channels | CG43388 |
| HP6 | HP6 | Heterochromatin protein 6 | telomere capping | CG15636 |
| if | if | inflated | integrin alpha subunit | CG9623 |
| ImpL2 | ImpL2 | Ecdysone-inducible gene L2 | insulin binding protein, negative regulator of PI3K signaling | CG15009 |
| kar | kar | karmoisin | amino acid transmembrane transporter | CG12286 |
| LamC | LamC | Lamin C | type V intermediate filament | CG10119 |
| laza | laza | lazaro | phosphatidate phosphatase involved in phototransduction | CG11440 |
| laza | laza | lazaro | phosphatidate phosphatase | CG11440 |
| Lmx1a | Lmx1a | LIM homeobox transcription factor 1 alpha | transcription factor | CG32105 |
| magu | magu | magu | secreted protein that binds glypicans and regulates BMP signaling | CG2264 |
| mid | mid | midline | transcription factor | CG6634 |
| mirr | mirr | mirror | transcription factor | CG10601 |
| mnd | mnd | minidiscs | putative amino acid/polyamine transporter involved in leucine import | CG3297 |
| NetA | NetA | Netrin-A | cell surface protein/ECM component | CG18657 |
| Nlg2 | Nlg2 | Neuroligin 2 | transmembrane protein involved in synaptic growth and regulation | CG13772 |
| Notum | Notum | Notum | Hh and Wnt signaling pathway regulator, glycophosphatidylinositol anchor cleavage | CG13076 |
| Orc1 | Orc1 | Origin recognition complex subunit 1 | replication initiation | CG10667 |
| peb | peb | pebbled | transcription regulator | CG12212 |
| ptc | ptc | patched | 12-pass transmembrane protein involved in Hh signaling regulation | CG2411 |
| sim | sim | single-minded | transcription factor | CG7771 |
| slbo | slbo | slow border cells | transcriptional activator | CG4354 |
| slif | slif | slimfast | amino acid transmembrane transporter | CG11128 |
| Spn42Dd | Spn42Dd | Serpin 42Dd | serine protease inhibitor | CG9456 |
| stg | stg | string | Cdc25 | CG1395 |
| tj | tj | traffic jam | Maf transcription factor | CG10034 |
| upd1 | upd1 | unpaired 1 | JAK/STAT signaling pathway ligand | CG5993 |
| upd3 | upd3 | unpaired 3 | JAK/STAT signaling pathway ligand | CG33542 |
| vas | vas | vasa | DEAD-box RNA helicase | CG46283 |
| Wnt4 | Wnt4 | Wnt oncogene analog 4 | Wnt signaling ligand | CG4698 |
| Wnt6 | Wnt6 | Wnt oncogene analog 6 | Wnt signaling ligand | CG4969 |
| wun2 | wun2 | wunen-2 | lipid phosphate phosphatase | CG8805 |
| Yp2 | Yp2 | Yolk protein 2 | yolk protein | CG2979 |

* annotation for CG10924 and CG15398 has recently changed.
